# Supplementary material for: The Venom Composition of the Snake Tribe Philodryadini: ‘Omic’ Techniques Reveal Intergeneric Variability among South American Racers
Source: MDPI journal article supplement (doi:10.3390/toxins15070415), 2023-06-27
Supplement: s1 [file s1]

**Table S1.** Number of reads obtained after sequencing by Illumina of the mRNA present in the Philodryadini venom glands and the number of contigs generated after *De novo* assembly.

| Snake Code | Species                                | Merged reads | % of Merged* | Number of Contigs generated |
|------------|----------------------------------------|--------------|--------------|-----------------------------|
| SB0512     | <i>Chlorosoma laticeps</i>             | 13.240.744   | 85.49%       | 204.864                     |
| SB0307     | <i>Philodryas nattereri</i>            | 15.939.987   | 90.31%       | 263.673                     |
| SB0132     | <i>Philodryas olfersii latirostris</i> | 13.401.460   | 91.04%       | 162.859                     |
| SB0001     | <i>Philodryas olfersii</i>             | 2.403.169    | 98.26%       | 57.270                      |
| SB0026     | <i>Philodryas olfersii</i>             | 3.413.445    | 98.60%       | 82.665                      |
| SB0235     | <i>Philodryas patagoniensis</i>        | 23.939.713   | 87.12%       | 183.351                     |
| SB0183     | <i>Philodryas agassizii</i>            | 13.705.159   | 85.30%       | 213.881                     |
| SB0559     | <i>Chlorosoma viridissimum</i>         | 16.716.391   | 84.49%       | 180.929                     |
| SB1590     | <i>Xenoxybelis argenteus</i>           | 8.515.040    | 82.90%       | 171.648                     |
| SB1881     | <i>Philodryas mattogrossensis</i>      | 7.508.732    | 82.41%       | 239.553                     |

\*The paired reads were merged based on their 3' overlaps using PEAR version 0.9.6 (Zhang et al. 2014).
