# Supplementary material for: The Venom Composition of the Snake Tribe Philodryadini: ‘Omic’ Techniques Reveal Intergeneric Variability among South American Racers
Source: MDPI journal article supplement (doi:10.3390/toxins15070415), 2023-06-27
Supplement: s1 [file s1]

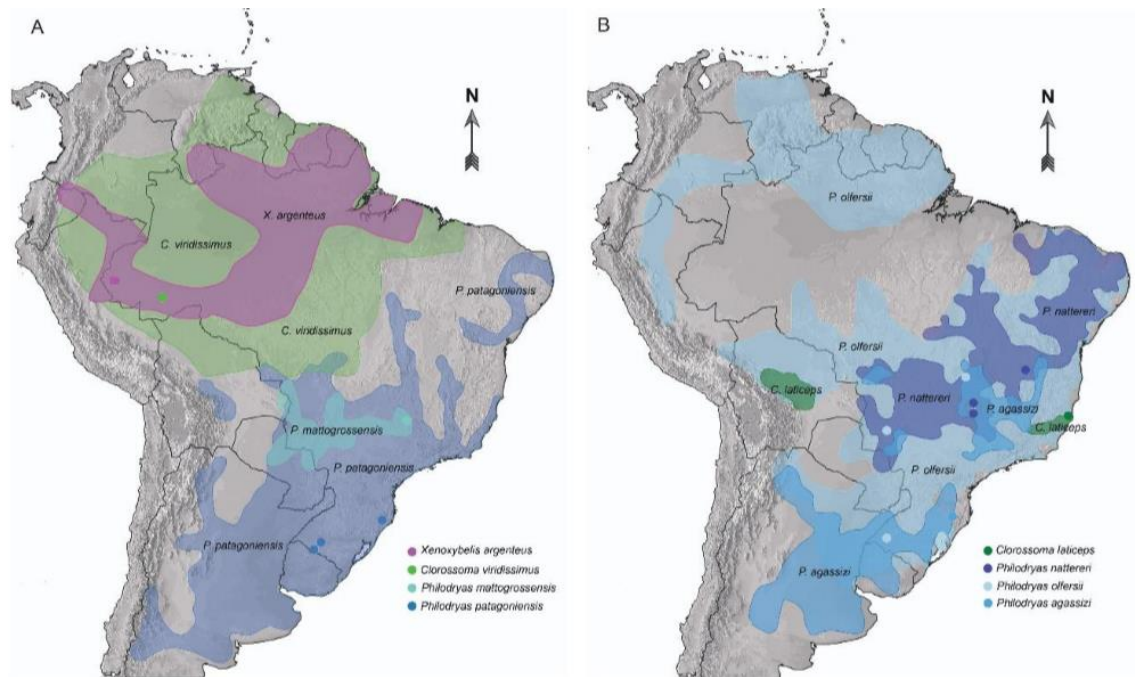

**Figure S1.** Geographical distribution of snakes 8 species [120] from the South American tribe Philodryadini (genus *Philodryas*, *Chlorosoma* and *Xenoxylbelis*) collected between 2016 and 2021 in Brazil. Each shaded area corresponds to the distribution of each species and sampled localities are shown as dots.

#### Reference

120. Nogueira, C.C.; Argôlo, A.J.S.; Arzamendia, V.; Azevedo, J.A.; Barbo, F.E.; Bérnils, R.S.; Bolochio, B.E.; Borges-Martins, M.; Brasil-Godinho, M.; Braz, H.; et al. Atlas of Brazilian snakes: verified point-locality maps to mitigate the Wallacean shortfall in a megadiverse snake fauna. *South Am. J. Herpetol.* **2019**, *14*, 1–274. DOI: 10.2994/SAJH-D-19-00120.1
