# Supplementary material for: The Venom Composition of the Snake Tribe Philodryadini: ‘Omic’ Techniques Reveal Intergeneric Variability among South American Racers
Source: Toxins (Basel). 2023 Jun 27;15(7):415. doi: 10.3390/toxins15070415 (PMC10467154; doi:10.3390/toxins15070415)
Supplement: Supplementary file 1 [file toxins-15-00415-s001.zip]

Archive with 6 entries (6 files):
- Supplementary_Figure_S1.pdf
- Supplementary_Table_S1.pdf
- Supplementary_Table_S2_transcriptome_annotation.xlsx
- Supplementary_Table_S3_rsem_expression.xlsx
- Supplementary_Table_S4_proteomic_analyses.xlsx
- Supplementary_Table_S5 _identification_peptides_sdspage.xlsx
