# Supplementary material for: The Venom Composition of the Snake Tribe Philodryadini: ‘Omic’ Techniques Reveal Intergeneric Variability among South American Racers
Source: Toxins (Basel). 2023 Jun 27;15(7):415. doi: 10.3390/toxins15070415 (PMC10467154; doi:10.3390/toxins15070415)
Supplement: Supplementary file 1 [file toxins-15-00415-s001.zip › Supplementary_Table_S2_transcriptome_annotation.xlsx]

## Sheet: P. OLFERSII
Table S2. Identification and annotation of transcripts of putative toxins from the venom glands of Philodryadini snakes.
Philodryas olfersii
Toxin group	Sequence code	Annotation	Nucleotide sequence	Amino acid sequence	BLAST identification	Accession number	Identity %
5' nucleotidase (NUCL)	SB0001_POLFNUCL001	Putative percursor of snake venom 5' nucleotidase	ATGCAGAGCCCGAGGCGAGGGCGCGGGACTCGGGGTTGCCCTGGAAGCGCCCCTTCGGCGACGCGGCGGCTCCTCGTCGGAGCCGTCTGGGTTTGCGCCGCGCTCTCGGTTGCCGCCGGCTCCTTCGAGCTCACCATTCTGCATACCAACGACGTCCACGCCCGCGTAGAGGAAACCAGCCGGGACGCGGGCAAATGCTCCCGGCGGGACTGCTACGGGGGCGTCGCGCGCCGGGCCGCCAAGATCCAGGAGATCCGCGCCTCGCATCGCCACGTCTTGCTCCTGGACGCCGGGGATCAGTACCAGGGCACCATCTGGTTCAGCTACTACAAAGGGCGCGAAGTGGTGCAATTCATGAATATCCTGCGCTACGACGCGATGGCTCTAGGAAATCATGAA…	MQSPRRGRGTRGCPGSAPSATRRLLVGAVWVCAALSVAAGSFELTILHTNDVHARVEETSRDAGKCSRRDCYGGVARRAAKIQEIRASHRHVLLLDAGDQYQGTIWFSYYKGREVVQFMNILRYDAMALGNHEFDNGLDGLLDPLLKHVKFPILSANIRPKGPIASNISGYILPYKILNVGSEKVGIIGYTTKETPVLSNPGPYLEFRDEVEELQIHANKLTTLGVNKIIALGHSGFKEDRRIAQKVKGVDVVVGGHTNTFLYTGSPPSNEVAAGNYPFMELSDDGRQVPVVQAYAFGKYLGYLNVVFDDKGNVMKASGNPILLNKDIPEDPAVKAEVDKMSIQLKNYSSQEIGKTIVYLNGTTHACRFQECNLGNLICDAVVYNNLRHPDDDEWNHVS…	5' nucleotidase, partial [Spilotes sulphureus]	AXL95273.1	89.63
C-type lectin (CTL)	SB0001_POLFCTL008	Putative percursor of snake venom C-type lectin	ATGGGGCGATTCACCCTTCTGACCCTCGGCTTGCTGGTCGTGGCTTTCTCCCTTAATGGAATTGGAGCTGATCACCCTTGCCCCATGGGCTGGTCCTCCTTTGAACACTTTTGCTACAAGTTCTTCAAACTACGGAAGACCTGGCAAGAGGCAGAGACGTTCTGCGTCCAAGAGCAGAATGGCAGCCATCTCGCCTCCATCCAAAGCTGGGCAGAGTCAGCTTACGTGGCCAGGCTGGTCTTCAGAAATATGCCCTTCTCCGATGTCTTGATCGGACTGAAGGATCTAGAGAAAAATCGCACCTGGGAATGGAGTGATGGCTCCAACTTCAGTTACACATCCTGGCAAATAAGCAAACCTAACAATGGTGATGATAAGGAGTACTGCGTTGCGCTAGCC…	MGRFTLLTLGLLVVAFSLNGIGADHPCPMGWSSFEHFCYKFFKLRKTWQEAETFCVQEQNGSHLASIQSWAESAYVARLVFRNMPFSDVLIGLKDLEKNRTWEWSDGSNFSYTSWQISKPNNGDDKEYCVALAKWSGYRGWKDVNCESKSFFICKLQPKSDGSN	C-type lectin lectoxin-Lei1-like [Thamnophis elegans]	XP_032094206.1	59.63
	SB0001_POLFCTL006	Putative percursor of snake venom C-type lectin	ATGGGGAGATTCATCTTTGTGAACCTGGGCTTGCTGGTTGTGGCTTTCTCCCTAAGGGGATCTGAAGCGGATTGTCCATCTGGTTGGTCCTCCTATGATAAGTATTGTTACAAGGTCTTTGATGAACGCAAGAATTGGGACGAAGCAGAGAGTTTCTGCATGGAGCAGAAGACGGGCAGCCATCTGGCCTCCATCCTTAGCAGTGAAGAAGGATCTTATGTGGCCAATCTGGCCTTCAAACGCGTGAAGCACCCTTCTATGTGGATCGGACTGAGTAATATATGGAACCAATGTAGCTGGCAGTGGAGTGATGGCTCCAGCCTCGGTTACGAAGCCTGGGTTGAAGGACCCGATTGTGTTATGATGCGTTTACAGCCAGGTTTTATCGACTGGTACAGT…	MGRFIFVNLGLLVVAFSLRGSEADCPSGWSSYDKYCYKVFDERKNWDEAESFCMEQKTGSHLASILSSEEGSYVANLAFKRVKHPSMWIGLSNIWNQCSWQWSDGSSLGYEAWVEGPDCVMMRLQPGFIDWYSVECKSTLPFTCKFLAKREDPAPE	RecName: Full=Snaclec subunit B; AltName: Full=C-type lectin subunit B; Flags: Precursor [Philodryas olfersii]	Q09GK0.1	99.36
	SB0001_POLFCTL004	Putative percursor of snake venom C-type lectin	ATGGGGCGATTCATCTTTGTGAGTCTCGGCTTGCTGGTTCTGGCTTTTTCCCTGAGTGGAATTGGAGCTGATCAACATTGTCCCTCTGGTTGGTTCTCCCACAATGTGTCTTGCTACAAGCTCATCAACGATTGGAAGACCTGGGACGAAGCGCAGAGGTTCTGCATGGACGAGCAGGAAAACGGCCAACTCGCCTCCATCAACGATGTGGGAGAGTCAGTGAAGTTGTCCGATGAGATCTCCAAAACATGGAGTATTATTGATGTCTGGATTGGATTGAGGCTTTCAAAGAGAAAAAGCATCTGGGAGTGGATTGATGGCTCCAGCGTGACCCAGACACGCTGGGAAGAAGGAGAACCCAACAACTTTTTGAAGAAGGAGTTCTGTGTTGTACTGACA…	MGRFIFVSLGLLVLAFSLSGIGADQHCPSGWFSHNVSCYKLINDWKTWDEAQRFCMDEQENGQLASINDVGESVKLSDEISKTWSIIDVWIGLRLSKRKSIWEWIDGSSVTQTRWEEGEPNNFLKKEFCVVLTSRSRYLKWNDKDCNRRHRFLCKF	RecName: Full=C-type lectin lectoxin-Phi1; Short=CTL; Flags: Precursor [Philodryas olfersii]	A7X406.1	99.36
	SB0001_POLFCTL003	Putative percursor of snake venom C-type lectin	ATGGGGAGATTCATCTTTGTGAACCTGGGCTTGCTGGTTGTGGCTTTCTCCCTAAGGGGATCTGAAGCTTGTTGTCCCTGCGGTTGGTCCTCCTACGATAAGTATTGCTACAAGGTCTTTGATAAACGCAAGAATTGGGACGATGCCGAGAGGTTCTGCATGGAGCAGGGGAAAGGCGGCCACCTGGCCGCTCTCGGAAGCCTCGAAGAGGGAAAATTTGTGGGCAAACTCGCCTTTAAAAAATTAAAGGAACACCCGACCTATGTCTGGATCGGACTGAGGGCTCAAGGCCAAGGACAGCAATGCAGCTCGAGGTGGAGTGATGGCTCCAGGATCCTTTATGAAAACTGGCATCCATTACAATCCAAAAAATGTATTGCGTTGTCAAAATGGACGGAG…	MGRFIFVNLGLLVVAFSLRGSEACCPCGWSSYDKYCYKVFDKRKNWDDAERFCMEQGKGGHLAALGSLEEGKFVGKLAFKKLKEHPTYVWIGLRAQGQGQQCSSRWSDGSRILYENWHPLQSKKCIALSKWTEYLKWYNHICDFTLPFICKFLAEPDDPE	RecName: Full=Snaclec subunit A; AltName: Full=C-type lectin subunit A; Flags: Precursor [Philodryas olfersii]	Q09GJ8.1	99.38
	SB0001_POLFCTL002	Putative percursor of snake venom C-type lectin	ATGGGGCGATTCATCTTTATGAGCCTCGGCTTGCTGGTTCTGGCTTTTTCCCTGAGTGGAATTGGAGCTGATCAACGTTGTCCCTCTGGTTGGTCCTCCCACAATGTGTCTTGCTACAAGTTCTTCGACGACTGGATGACCTGGGACGAAGCGCAGAGGTTCTGCATGGACGAGCAGGAAAACGGCCAACTCGCCTCCATCAAAGATCTAGAAGAGGCAGTGAAGTTGTCCTACCTGATCTCCAAAGCAAGGAGTATTTTTGATGTCTGGATTGGACTGAGGTTTTCAAAGAGAAAAAGCATCTGGGAGTGGATTGATGGCTCCAGCGTGACCCAGACACGCTGGGAAGAAGGAAAACCCAACAACGTTTTGAAGAAGGAGTTCTGTGCTATACTGACA…	MGRFIFMSLGLLVLAFSLSGIGADQRCPSGWSSHNVSCYKFFDDWMTWDEAQRFCMDEQENGQLASIKDLEEAVKLSYLISKARSIFDVWIGLRFSKRKSIWEWIDGSSVTQTRWEEGKPNNVLKKEFCAILTSRSHYLKWNNTNCRGWHPFVCKFQPPREASGC	RecName: Full=C-type lectin lectoxin-Phi1; Short=CTL; Flags: Precursor [Philodryas olfersii]	A7X406.1	80.13
C-type Natriuretic Peptide (CNP)	SB0001_POLFCNP001	Putative percursor of snake venom C-type Natriuretic Peptide	ATGTTCGCCTCCCGTCTGGCGGCCGGCGGGCTGCTCTTGCTGGCCCTGCTGGCTCTGGCCCTCGACGGCAAGCCGGCGCCCCCGCAGCCGCTGCGCAAGGCTCCGGCGGGCGGTACGACGGCGTGGCGGCGGGAGCTGACGGAGCAGCCGGAGGGGGCGTCGCGGCCCGCGGCTGGAGGAGGCGGCGGCGGCGGCCGCAGCGGCTCCAAGGCGGCCAATGCGGCCCCGACGGCACCGAAGAGCAAAGCGGCGGCGGCGGCGGCGGCGGCGGCGCGGCTGATGCGGGATTTGCGCCCCGACAGCAAGCAGGCGCGGGCCGCCTGGGGCCGGATGGTGCACCCCGAGCACCACGCAGGAGGCGGCGGCGGCGGCGGCGGCGGAGGAGCCTCGCGTCGCCTG…	MFASRLAAGGLLLLALLALALDGKPAPPQPLRKAPAGGTTAWRRELTEQPEGASRPAAGGGGGGGRSGSKAANAAPTAPKSKAAAAAAAAARLMRDLRPDSKQARAAWGRMVHPEHHAGGGGGGGGGGASRRLKGVAKKGLGKGCFGLKLDRIGSMSGLGC	RecName: Full=C-type natriuretic peptide; Short=CNP; Flags: Precursor [Philodryas olfersii]	Q09GK2.1	97.56
Cystatin-C (CYS)	SB0001_POLFCYS002	Putative percursor of snake venom Cystatin-C	ATGGCTTTGTCGCGGGGGCTTTTGGCGTGCGCTTTACTCCTGCTCAGTTGTGTCTGCAAACAGGCGCTCGGGACCAGGCTCCTCGGGGGACTGGAGGATGCTTCCCTGGAGGAGCCGGGCGTCCGTACGGCCCTCCAATTTGCCGTGAACGAATACAACAGAGGAAGCAACGATATGTACCATAGTCGCGTATCCGAAGTGATCCGAGCCCAAAAACAGATTGTCAGCGGAATTAAGTATTACTTCACTGTTATGATTGGACGTACTGTTTGCCGTAAGGAAGCATCTGATCTTGAAAATTGTGCATTTCATAGCACACCTAAACTGGCACAGACAATGACTTGCACTTTTGAGGTTTACAATGTTCCTTGGAGAAACACCATTTCCCTGGAAAAAAGT…	MALSRGLLACALLLLSCVCKQALGTRLLGGLEDASLEEPGVRTALQFAVNEYNRGSNDMYHSRVSEVIRAQKQIVSGIKYYFTVMIGRTVCRKEASDLENCAFHSTPKLAQTMTCTFEVYNVPWRNTISLEKSSCA	Cystatin-C, partial [Ophiophagus hannah]	ETE66625.1	80.74
	SB0001_POLFCYS001	Putative percursor of snake venom Cystatin-C	ATGCACTCCCGGCTGCCGATCCCGGCTCCCCTCGGCCTGCTCTGCGCCCTCCTGCTGCTGCTGCCCTCGGGGGTGCCGGCGATGATCCCCGGGGGTCTCTCCCCCAGATCCGTCGCGGACCCGGAAGTCCAGCAAGCCGCCGCCTTCGCCGTGGAGGAATACAACGCGCGCAGCTCCAACGCCAACTACTTCAAGGACTTGCGCGTTGTGGACGCGCAGTCCCAGGTAGTCGCAGGGGTGAAATATTATCTGACGATGGAGTTGGTGAAAACCCAGTGTGAAAAGACCGCTGGCAAACGGAAGGTGTACAAAGAGATCCAGAACTGTGAACTCCCTCCAGGGGCTCAGCAGGAGAAACTAACTTGCCACTTCCAAATCTGGAGTCGTCCATGGCTGGGA…	MHSRLPIPAPLGLLCALLLLLPSGVPAMIPGGLSPRSVADPEVQQAAAFAVEEYNARSSNANYFKDLRVVDAQSQVVAGVKYYLTMELVKTQCEKTAGKRKVYKEIQNCELPPGAQQEKLTCHFQIWSRPWLGKTELTKMSCN	RecName: Full=Cystatin; Flags: Precursor	E3P6P4.1	85.34
Cysteine-rich secretory protein (CRISP)	SB0001_POLFCRISP001	Putative percursor of snake venom Cysteine-rich secretory protein	ATGATTGTCTTCATCTTGCTAAGTCTTGCTGCAGTGCTGCAACAGTCTTTTGGACTTGTTGATTTTAATTCTGAGTCACCCAGGAGGCCAGAAATACAAAGGGTGATTGTTGACACGCACAATTCTTACAGAAGAACAGTCAGTCCAACTGCTAGCAACATGCTAAGAATGGAATGGTATGCTGAAGCTGCTGCAAATGCAGAACGTTGGGCGTCTCTATGTGCTTATGATCACAGCCAAAATTCTGACAGAGTTCTTGATGGAATACAATGTGGTGAAAATATATACATGTCAAGTAATCCCAGGTCATGGACTGAAATAATGCAGTCTTGGTATGATGAATACAAAAATTTTGACTTTGGCTATGGAGCAAACCCACCAGGTTCTGTTATTGGCCAT…	MIVFILLSLAAVLQQSFGLVDFNSESPRRPEIQRVIVDTHNSYRRTVSPTASNMLRMEWYAEAAANAERWASLCAYDHSQNSDRVLDGIQCGENIYMSSNPRSWTEIMQSWYDEYKNFDFGYGANPPGSVIGHYTQIVWYKSYRIGCAAYYCPSSLYNYFYVCQYCPAGNFAGRTATPYNSGPTCGDCPSACDNGLCTNPCSEKNEFTNCNELVQQSSCQDDWIKSNCAATCFCKNKII	RecName: Full=Cysteine-rich venom protein; Short=CRVP; AltName: Full=CRISP-PHI1; AltName: Full=CRISP-PHI2; AltName: Full=Cysteine-rich secretory protein; Flags: Precursor [Philodryas olfersii]	Q09GJ9.1	100.00
Hyaluronidase (HYAL)	SB0001_POLFHYAL001	Putative percursor of snake venom Hyaluronidase	ATGTGTCATCTATGGATTAAATGCCTGGCAACTTGGATATTACTGAAGAGATTTAATGGAGTTCATGTTATGCAGACCAAAGCTCCAATGTATCCTAATGAACCTTTCATTGTGTTCTGGAATGCACCTACCACCCAATGTCAGATGCGCTATAAGGTGGATTTAGACCTCAAGATTTTTCACGTTGTACCAAATGCCAATGAGTCTTTGAGTGGGTCTGCTGTGACAATATTTTATCCTACCCAGTTGGGGCTCTATCCCCATATTGATGACCATGGACATTTCCTCCATGGGATTATACCGCAAAATGAAAGCCTCACCAAACATCTCAATAAAACAAAATCGGATATCAACCGTATGATCCCACTGAAGACATTTCATGGACTTGGAGTCATCGAC…	MCHLWIKCLATWILLKRFNGVHVMQTKAPMYPNEPFIVFWNAPTTQCQMRYKVDLDLKIFHVVPNANESLSGSAVTIFYPTQLGLYPHIDDHGHFLHGIIPQNESLTKHLNKTKSDINRMIPLKTFHGLGVIDWENWRPQWDRNWGTKNVYRTRSIQFAKELHPNLTEVAIKRLAKQEYEKAGKSFMRDTLLVAEDMRPDGYWGYYLYPDCYNYDYKKNPDQYTGRCPNIEISRNDQLLWLWRDSTALFPSIYLEIILRSSANALKFVHHRLKESMRIASMARKDYALPVFVYARPFYAYTFEPLTEEDLVTTIGETAAMGAAGMVFWGSMQYASTSESCQKVKEYMNGAFGRYIINVTTAAKICSHVLCKKKGRCVRKHSDSNAFLHLFPESFSIMIH…	hyaluronidase [Pantherophis guttatus]	XP_034277309.1	91.95
Kunitz-type protein (KUNZ)	SB0001_POLFKUNZ001	Putative percursor of snake venom Kunitz-type protein	ATGTGGGCCAGGGTCCTTCTCCTGGGGGTGCTCCTCTCCCTCCTTGCTGACCTCCATGCTGCCAGTGGTGGAGATGCTGGGGGTCAAAAGACCTGGAATCCTCGGATCAGCGACTGTGAGCTCCCTCCAGAGAAAGGTCCCTGTAATAATTTAGAACTTCGCTGGTTCTACAACTTAAAGTCCAAGAGATGCGAACGTTTCTTCTATGGAGGCTGCTATGGAAATGCTAACAACTTCAAGGAGATCAATGAATGTGACCGCCGTTGTGTCTCCCCAGATGTCAACAAGCCTGGCATCTGCACCAAGCCAATTAGTCCCGATGACAAAATTTGTGGCAAATTCTGCTCCAACGATGCCAGCTGTCCGAGCACTCAGCGCTGCTGTGCAACGTCTTGTGGA…	MWARVLLLGVLLSLLADLHAASGGDAGGQKTWNPRISDCELPPEKGPCNNLELRWFYNLKSKRCERFFYGGCYGNANNFKEINECDRRCVSPDVNKPGICTKPISPDDKICGKFCSNDASCPSTQRCCATSCGQQCQLSEGENSGYCPLLIRPPSNKDSPLCFRNCTRDHECNVGFSRPWKKCCPFGDRKICVEDVEEHPGVCPRRVEVQSFVPCNHTCGDDHDCPLTEKCCFTGCSRGCLPSVRSDRCQLPQDQGSCSKELQRFYYDPEKKRCLSFVYRGCEGNSNNFETKELCEKACGKISKEVCKLPADSGPCLGLSIQYYYNWNTKKCETFTYGLCKGNDNRFSTKLECQMVCEGFDQQQQPKE	papilin-like [Pseudonaja textilis]	XP_026580479.1	74.44
Ku-wap-fusin protein (KUWAP)	SB0001_POLFKUWAP001	Putative percursor of snake venom Ku-wap-fusin protein	ATGCAGCCTGAGTGTGGGGCAAACGGCTTCACCATGTCTTCTGGAGGTCTTCTTCTCCTGCTGGGACTCCTCACCCTCTGGGCAGAGCTGACCCCCGTCTCCGGCCAGGACCGGCCAGAGCTTTGTTACCTTCCGGCGGACACTGGACCATGTAAAGCCAAATTTCCTCGCTTCTACTACAGCTCGGCTTCAAATAAATGCCAAGAGTTTATTTATGGTGGGTGCCAGGGCAATGCCAACAATTTTGAGACCAAAGATGAATGCCACTTCACCTGTGTTGAAAAGCCTGGTGTGTGTCGCAAGGCCCCTCCAGGCACAAGCACTATTTGTATTGTGAACTGTGAAAATGACTGGAAATGCCCCGGGAAGCAGAAGTGCTGCAGTTACGCTTGCATGGTT…	MQPECGANGFTMSSGGLLLLLGLLTLWAELTPVSGQDRPELCYLPADTGPCKAKFPRFYYSSASNKCQEFIYGGCQGNANNFETKDECHFTCVEKPGVCRKAPPGTSTICIVNCENDWKCPGKQKCCSYACMVDCMDPI	kunitz/BPTI-like toxin [Pantherophis guttatus]	XP_034280079.1	88.28
Phospholipase A2 inhibitor (iPLA)	SB0001_POLFiPLA001	Putative percursor of snake venom Phospholipase A2 inhibitor	ATGAAGCATCTTCTTATTTTCACTGCTTTGATAATTACAGCAACTGATGCTCAACTGATCTGCACATGTTCTGCGCCAACGATTGGACCACCGTGCAGCGCGGAAAATACTTGTACTACCCCAAAGGGACAATGTTATTCAATTCAGAGGCAAATTGCTACCGAGAAAGATAAGTCAGCCGATGGAGCAAGTAAAGGCTGCCAAGAAGACAAAGATCCTAAGGTCTGCAACGAAGGGGTTGTGTTCATTTCGACTGAGAATATTTTTTATCTGCTGAGCAATGTTACATGCTGTGACAAAAATGAATGCAACAAAGATGTCGTTGTAGAACTTCCAAAAGTTTCCACTCTTACGACTCTTTCCAGCAAAAAACTGGTTTGCCCATCATGCTTTACTTTG…	MKHLLIFTALIITATDAQLICTCSAPTIGPPCSAENTCTTPKGQCYSIQRQIATEKDKSADGASKGCQEDKDPKVCNEGVVFISTENIFYLLSNVTCCDKNECNKDVVVELPKVSTLTTLSSKKLVCPSCFTLDKKECDAKQMNCSEGQDKCFTIIGTITKGETPPKNFIAKGCAAQSAILKNGTTLTFGDAAYKLDAVEVVEAKGGVSQISSCLSLAILLPSVLWFLLDSSLY	phospholipase A2 inhibitor and Ly6/PLAUR domain-containing protein-like [Notechis scutatus]	XP_026537221.1	61.18
Phospholipase B (PLB)	SB0001_POLFPLB001	Putative percursor of snake venom Phospholipase B	ATGGTCCGCTACGGCATCGCCTCCTCCCCGGACAATCGCCGCCTGCGATGCTGGAGCTGGTACTGGGGGGTACTTTTACTTCTCTGGGCCGTGGCAGAAACTCGAGCAGATCTCCACTATGCTACTGTATATTGGTTGGAAGCTGAAAAATCTTTCCAAGTTAGGGATGTATTAGACAAGAATGGTGATGCTTATGGCTATTACAATGACACTGTACAATCTACTGGATGGGGGATACTTGAGATCAAAGCAGGCTACGGTAATCAGCCCGTAAGCAATGAAATACTCATGTACGCTGCAGGTTTCTTGGAAGGCTACCTCACTGCTTCACGTATGAGTGACCATGTTGCAAATCTATATCATCAGCTGATTAAGAATGTCATCATTGAACAAAAAGTA…	MVRYGIASSPDNRRLRCWSWYWGVLLLLWAVAETRADLHYATVYWLEAEKSFQVRDVLDKNGDAYGYYNDTVQSTGWGILEIKAGYGNQPVSNEILMYAAGFLEGYLTASRMSDHVANLYHQLIKNVIIEQKVKDFMKKQDEWTRQQIKNNKDDPFWRNAGYIIAQLDGLYMGNVEWAKRQKRTPLTDFEISFLNAIGDLLDLIPALISDSRNNDFLSLREISRMYQWDMGHCSALIKVLPGYENIYFAHSSWFTYAATLRIYKHWDFRIIDPQTKTGRASFSSYPGFLVSLDDFYILGSGLIMLQTTNSVFNLSLLKQVVPESLFAWQRVRIANMMADSGKSWAQTFEKENSGTYNNQYMILDIKKIKLQRSIDDGTLYIIEQVPNLVKYSDQTDILR…	phospholipase B, partial [Spilotes sulphureus]	AXL95274.1	94.03
Snake venom Endogenous Matrix-Metalloproteinase 9 (seMMP-9)	SB0001_POLFSeMMP004	Putative percursor of snake venom endogenous Matrix Metalloproteinase 9	ATGAGACTCCCAGTCCCGGCCTCCCTCCTCCTCCTCCTGGCGCTCCTGCCGCTGCCCTGTCCGTGGGCCGCCCCGACGGCGGAAGGGAAGGGCCCCGTAGTCATCACCTTCCCCGGGGACGCCGTCAGCCACCTGACGGACCGGGACTTGGCCGCCCGCTACCTCCAGCGTTACGGGTACCTGACGACGACCAACCCCGGGGGGCAGGTGAAGCTGGAGACCCCCCTCAAGGCCATGCAGAAACAGCTGGGCTTGCCGGAAACGGGGGAGCTGGACGCCCCCACCCTCACGGCCATGCGAGCGCCCCGCTGCGGAGTCCCGGACGTGGGTCGCTTCCAGACCTTCGAGGGCGACCTCAAGTGGGACCACACGGACCTCACTTACCGGGTGGTCAACTAT…	MRLPVPASLLLLLALLPLPCPWAAPTAEGKGPVVITFPGDAVSHLTDRDLAARYLQRYGYLTTTNPGGQVKLETPLKAMQKQLGLPETGELDAPTLTAMRAPRCGVPDVGRFQTFEGDLKWDHTDLTYRVVNYSPDLDGSIIEDAFARAFKVWSEVTPLTFTHQQEGEEVDILIQFGTREHGDGYPFDGKDGLLAHAFPPGKDRFSGDAHFDDDEFWTLGTGIVVKTHFGNANGAVCHFPFIFEGKSYSSCTTEGREDGLPWCATTPDYDRDEKYGFCPSELLFTYDGNSDGEKCVFPFVFEGKSYQGCTTDGRTDGYRWCATTANFDEDKKYGFCPNRDTAVIGGNSQGEPCSFPFKFLGQTYSSCTTEGRTDGKLWCATTSDYDADKKWGLCPDQGY…	matrix metalloproteinase-9 [Pantherophis guttatus]	XP_034280049.1	89.15
	SB0001_POLFSeMMP001	Putative percursor of snake venom endogenous Matrix Metalloproteinase 9	ATGAGACTCCCAGTCCCGGCCTCCCTCCTCCTCCTCCTGGCGCTCCTGCCGCTGCCCTGTCCGTGGGCCGCCCCGACGGCGGAAGGGAAGGGCCCCGTAGTCATCACCTTCCCCGGGGACGCCGTCAGCCACCTGACGGACCGGGAGCTGGCCGCCCGCTACCTCCAGCGTTACGGGTACCTGACGACGACCAACCCCGGGGGGCAGGTGAAGCTGGAGACCCCCCTCAAGGCCATGCAGAAACAGCTGGGCTTGCCGGAAACGGGGGAGCTGGACGCCCCCACCCTCACGGCCATGCGAGCGCCCCGCTGCGGAGTCCCGGACGTGGGTCGCTTCCAGACCTTCGAGGGCGACCTCAAGTGGGACCACACGGACCTCACTTACCGGGTGGTCAACTAT…	MRLPVPASLLLLLALLPLPCPWAAPTAEGKGPVVITFPGDAVSHLTDRELAARYLQRYGYLTTTNPGGQVKLETPLKAMQKQLGLPETGELDAPTLTAMRAPRCGVPDVGRFQTFEGDLKWDHTDLTYRVVNYSPDLDGSIIEDAFARAFKVWSEVTPLTFTHQQEGEEVDILIQFGTREHGDGYPFDGKDGLLAHAFPPGKDRFSGDAHFDDDEFWTLGTGIVVKTHFGNANGAVCHFPFIFEGKSYSSCTTEGREDGLPWCATTPDYDRDEKYGFCPSELLFTYDGNSDGEKCVFPFVFEGKSYQGCTTDGRTDGYRWCATTANFDEDKKYGFCPNRDTAVIGGNSQGEPCSFPFKFLGQTYSSCTTEGRTDGKLWCATTSDYDADKKWGLCPDQGY…	matrix metalloproteinase-9 [Pantherophis guttatus]	XP_034280049.1	89.30
	SB0026_POLFSeMMP001	Putative percursor of snake venom endogenous Matrix Metalloproteinase 9	ATGAGACTCCCAGTCCCGGCCTCCCTCCTCCTCCTCCTGGCGCTCCTGCCGCTGCCTTGTCCGTGGGCCGCCCCGACGGAGGAAGGGAAGGGCCCCGTAGTCATCACCTTCCCCGGGGACGCCGTCAGCCACCTGACGGACCGGGAGCTGGCCGCCCGCTACCTCCAGCGTTACGGGTACCTGACGACGACCAACCCCGGGGGGCAGGTGAAGCTGGAGACCCCCCTCAAGGCCATGCAGAAACAGCTGGGCTTGCCGGAAACGGGGGAGCTGGACGCCCCCACCCTCACGGCCATGCGAGCGCCCCGCTGCGGAGTCCCGGACGTGGGTCGCTTCCAGACCTTCGAGGGCAACCTCAAGTGGGACCACACGGACCTCACTTACCGGGTGGTCAACTAT…	MRLPVPASLLLLLALLPLPCPWAAPTEEGKGPVVITFPGDAVSHLTDRELAARYLQRYGYLTTTNPGGQVKLETPLKAMQKQLGLPETGELDAPTLTAMRAPRCGVPDVGRFQTFEGNLKWDHTDLTYRVVNYSPDLDGSIIEDAFARAFKVWSEVTPLTFTRQQEGEEVDILIQFGTREHGDGYPFDGKDGLLAHAFPPGKDRFSGDAHFDDDEFWTLGTGIVVKTHFGNANGAVCRFPFIFEGKSYSSCTTEGREDGLPWCATTPDYDRDEKYGFCPSELLFTYDGNSDGEKCVFPFVFEGKSYQGCTTDGRTDGYRWCATTANFDEDKKYGFCPNRDTAVIGGNSQGEPCSFPFKFLGQTYSSCTTEGRTDGKLWCATTSDYDADKKWGLCPDQGY…	matrix metalloproteinase-9 [Pantherophis guttatus]	XP_034280049.1	89.60
Snake Venom Metalloproteinase P-III Class (SVMP P-III)	SB0001_POLFSVMPIII008	Putative percursor of snake venom Metalloproteinase P-III Class	ATGATCCAAGTTCTCTTGGTTACTATATACTTAGTGGTTTTTCCATATCAAGGGAGCTCTATAATCCTGGAATCCGGGAATGTTAATGATTATGAAGTAGTGTATCCACAAAAAGTGCCTGTATTGCCCAAAGGAGGACTTCAGAATGCTGAGCCAGAGACCGAGTATGAAGATACAATGCAATATGAATTTCAAGTGAATGGAGAGCCAGTGGTCCTTCACCTAGAAAGAAATAAAGGACTTTTTTCAGAAGATTACAGTGAAACTCATTATTCCCCTGATGGCAGTGAAATTACAACCACCCCTCCAGTTGGGGATCACTGCTATTATCATGGACACATCAAGAATGAAGCTGACTCAACTGCAGTCATCAGTGCATGTGACGGCTTGAAAGGACAT…	MIQVLLVTIYLVVFPYQGSSIILESGNVNDYEVVYPQKVPVLPKGGLQNAEPETEYEDTMQYEFQVNGEPVVLHLERNKGLFSEDYSETHYSPDGSEITTTPPVGDHCYYHGHIKNEADSTAVISACDGLKGHFKHQGETYFIEPLKLSNSEAHAVYKYDSLEKEGETHKTCGVTQTTWKLDEPIEKSITPEEQNAYLDAPKYIEFFIVVDNGMFRKYSSDLTAIRTRVYETVNIVNTIYRAMDIHVALIGLEIWSNRDKITVQTAANVTLDLFGTWRETDLLQRRRNDNAQLITSIDFNGPTVGLGYVGTFCRPKHSSAIVQDHSALTSLMASTMAHEMGHNLGINHDTNACHCSSNACVMSPTISSVPYYQFSSCSIQEHRSYLTRAQPQCILNKPL…	snake venom metalloprotease [Philodryas olfersii]	ACS74987.1	99.35
	SB0001_POLFSVMPIII007	Putative percursor of snake venom Metalloproteinase P-III Class	ATGATTCAAGCTCTCTTGGTAACTATATGCTTAGTGGTTTTTCCATATCAAGGGAGTTCTATAATCCTGGAATCCGGGAATGTTAATGATTATGAAGTAGTATATCCACAAAAAGTGCCTGTGTTGCCCAAAGGAGGACTTCAGAATGCTGAGCCAGAGACCAAGTATGAAGATACAATGCAATATGAATTTCAAGTGAATGGAGAGCCAGTGGTCCTTCACCTAGAAAGAAATAAAGGACTTTTTTCAGAAGATTACAGTGAAACTCATTATTCCCCTGATGGCAGAGAAATTACAACCACCCCTCCAGTTCAGGATCACTGCTATTATCATGGACACATCCAGAATGAAGCTGACTCAACTGCAGTCATCAGTGCATGCAATGGTTTGAAAGGACAT…	MIQALLVTICLVVFPYQGSSIILESGNVNDYEVVYPQKVPVLPKGGLQNAEPETKYEDTMQYEFQVNGEPVVLHLERNKGLFSEDYSETHYSPDGREITTTPPVQDHCYYHGHIQNEADSTAVISACNGLKGHFKHQGETYFIEPLKLSNSEAHAVYKYDSLEKEDETHKTCGVTQTTWELDEPIEKISQVSITPEEQKAYLDAQKYIEFFIVVDNRMFRKYSSNFTVISRRVYEIVNTLNTIYRALKIYVALIGLEIWSNGDQIKLQTNSTETLKLFGEWREKDLIPRKRNDYAQLLTDIYFDEATLGEAYLGTLCQSKKSVAVVMDHTHSTSIMASTMAHELGHNLGIRHDRQFCNCNFNRCIMSPSVSYQPIIQFSNCSIQDHRRYLIRRQPQCIL…	venom metalloprotease precursor [Philodryas chamissonis]	AJB84503.1	78.54
	SB0001_POLFSVMPIII006	Putative percursor of snake venom Metalloproteinase P-III Class	ATGATCCAAGCTCTCTTGATTACTATATGCTTAGCGGTTTTTCCATATCAAGGGAGCTCTATAAAACTGGAATCTGGGAATGTTAATAATTATGAAGTAGTGTATCCACAAAAAGTGTCTGTATTGCCCAAAGGAGGACTTCAGAATGCTGAGCCAGAGACCAAGTATGAAGATGCAATGCAATATGAATTTCAAGTGAATGGAGAGCCAGTGGTCCTTCACCTAGAAAGAAATATAGGACTTTTTTCAGAAGATTACAGTGAAACTCATTATTCTCCTGATGGCAGAGAAATTACAACCACCCCTCCAGTTTGGAATCACTGCTATTATCATGGACGCATCCAGAATGAAGCTGACTCAACTGCAGTGATCAGTGCATGTGACGGCTTGAAAGGACAT…	MIQALLITICLAVFPYQGSSIKLESGNVNNYEVVYPQKVSVLPKGGLQNAEPETKYEDAMQYEFQVNGEPVVLHLERNIGLFSEDYSETHYSPDGREITTTPPVWNHCYYHGRIQNEADSTAVISACDGLKGHFKHQGETYFIEPLKLSNSEAHAVYKYDSLEKEDETHKTCGVTQTIWELDEPTEKISQVSIIPKEQNTYLDAKKYIEFFIVVDNGMFRKYSSDLTVIRTRVYEIVNTVNTIYRPLDIHVALIGLEIWSNQDQINVQADEQVTLNLFGEWRKTNLLPRKRNDNAQLLTSIDFNGPTIGYAYVGSICEPKKSSATVQDHTDSTRLIASTVAHELGHNLGIHHDTNACCNACVMSPGIGNVPYYQFSSCSIQEHRSYLTRDQPQCILNKP…	venom metalloprotease precursor [Philodryas chamissonis]	AJB84503.1	84.55
	SB0001_POLFSVMPIII005	Putative percursor of snake venom Metalloproteinase P-III Class	ATGATCCAAGCTCTCTTGGTTACTATATGCTTAGCGGTTTTTCCATATCAAGGGAGCTCTATAAAACTGGAATCCGGGAATGTTAATGATTATGAAGTAGTGTATCCACAAAAAACGCCTATATGGCCCAGAGGAGGACTTCAGAATGCTGAGCCAGAGACCGAGTATGAAGATGCAATGCAATATGAATTTCAAGTGAATGGAGAGCCAGTGGTCCTTCACCTAGAAAGAAATAAAGGACTTTTTTCGGAAGATTACAGTGAAACTCATTATTCTCCTGATGGCAGAGAAATTACAACCACCCCTCCAGTTCAGAATCACTGCTATTATCATGGACACATCCAGAATGAAGCTGACTCAACTGCAGTCATCAGTGCATGTGACGGCTTGAAAGGACAT…	MIQALLVTICLAVFPYQGSSIKLESGNVNDYEVVYPQKTPIWPRGGLQNAEPETEYEDAMQYEFQVNGEPVVLHLERNKGLFSEDYSETHYSPDGREITTTPPVQNHCYYHGHIQNEADSTAVISACDGLKGHFKHQGETYFIEPLKLSDSEAHAVYKYDSLEKEDETHKTCGVTQTTWKLDEPIEKSITPEEQNAYLDAKKYIEFFIIVDNGMFRKYTGNYTAIRTRVYEIVNIVNTMFKVLNIHVALIGLEIWSNQDQSPVQSNSTATLELFGEWREKKLIPRKRNDNAQLITSIVFDEDTLGEAYIASFCHSRGSVAVVQDYSALTSLMATVMAHELGHNLGMDHDTINCACNFSQCIMFPSASNVPSYQFSSCSIQEHRRYLSRYRPQCILNKPL…	venom metalloprotease precursor [Philodryas chamissonis]	AJB84503.1	79.71
	SB0001_POLFSVMPIII004	Putative percursor of snake venom Metalloproteinase P-III Class	ATGATCCAAGTTCTCTTGGTTACTATATACTTAGTGGTTTTTCCATATCAAGGGAGCTCTATAATCCTGGAATCCGGGAATGTTAATGATTATGAAGTAGTGTATCCACAAAAAGTGCCTGTATTGCCCAAAGGAGGACTTCAGAATGCTGAGCCAGAGACCGAGTATGAAGATACAATGCAATATGAATTTCAAGTGAATGGAGAGCCAGTGGTCCTTCACCTAGAAAGAAATAAAGGACTTTTTTCAGAAGATTACAGTGAAACTCATTATTCCCCTGATGGCAGTGAAATTACAACCACCCCTCCAGTTGGGGATCACTGCTATTATCATGGACACATCAAGAATGAAGCTGACTCAACTGCAGTCATCAGTGCATGTGACGGCTTGAAAGGACAT…	MIQVLLVTIYLVVFPYQGSSIILESGNVNDYEVVYPQKVPVLPKGGLQNAEPETEYEDTMQYEFQVNGEPVVLHLERNKGLFSEDYSETHYSPDGSEITTTPPVGDHCYYHGHIKNEADSTAVISACDGLKGHFKHQGETYFIEPLKLSNSEAHAVYKYDSLEKEGETHKTCGVTQTTWKLDEPIEKSITPEEQNAYLDAPKYIEFFIVVDNGMFRKYSSDLTAIRTRVYETVNIVNTIYRAMDIHVALIGLEIWSNRDKITVQTAANVTLDLFGTWRETDLLQRRRNDNAQLITSIDFNGPTVGLGYVGTFCRPKHSSAIVQDHSALTSLMASTMAHEMGHNLGINHDTNACHCSSNACVMSPTISSVPYYQFSSCSIQEHRSYLTRAQPQCILNKPL…	snake venom metalloprotease [Philodryas olfersii]	ACS74987.1	100.00
	SB0001_POLFSVMPIII003	Putative percursor of snake venom Metalloproteinase P-III Class	ATGATCCAAGCTCTCTTGATAACTATATGCTTAGCGGTTTTTCCATATCAAGGGAGTTCTATAATCCTGGAATCCGGGAATGTTAATGATTATGAAGTAGTATATCCACAAAAAGTGCCTGTGTTGCCCAAAGGAGGACTTCAGAATGCTGAGCCAGAGACCAAGTATGAAGATACAATGCAGTATGAATTTCAAGTGAATGGAGAGCCAGTGGTCCTTCACCTAGAAAGAAATAAAGGACTTTTTTCAGAAGATTACAGTGAAACTCATTATTCCCCTGATGGCAGAGAAATTACAACCACTCCTCCAGTTCGGGAACACTGCTATTATCATGGACACATTCAGAATGATGCTGACTCAACTGCAGTCATCAGTGCATGTGACGGCGTGAAAGGACAT…	MIQALLITICLAVFPYQGSSIILESGNVNDYEVVYPQKVPVLPKGGLQNAEPETKYEDTMQYEFQVNGEPVVLHLERNKGLFSEDYSETHYSPDGREITTTPPVREHCYYHGHIQNDADSTAVISACDGVKGHFKHQGETYFIEPLKLSDSEAHAVYKYENVEKEDETHKTCGVTETTWESDEPIEKSPQLVVTPEQLRYLQAPKYIELCIVVDNVMFRKYTGNYTVIRTRVYEIVNSLNMIYRSLNIHAALTGLEFWSNQDQINVQADASVTLDLFGEWRKTNLLPRRRNDNAQLLTGINFNGPTLGLGYVGTLCKPKFSSAIVMDHNKMAVFIASAMAHEMGHNLGINHDRNSCTCGSNSCIMSPTLSFEPLYRFSNCSIQEHREYLIRDLPQCILN…	snake venom metalloproteinase 24, partial [Borikenophis portoricensis]	AXL96574.1	77.72
	SB0001_POLFSVMPIII002	Putative percursor of snake venom Metalloproteinase P-III Class	ATGATCCAAGCTCTCTTGATAACTATATGCTTAGCGGTTTTTCCATATCAAGGGAACTCGATAATCCTGGAATTCGGGAATGTTAATGATTATGAAGTAGTATATCCACAAAAAGTGCCTGTATTGCCAAAAGGAGGACTTCAGAATGCTGAGCCAGAGAGCAAGTATGAAGATACAATACAATATGAATTTCAAGTGAATGGAGAGCCAGTGGTCCTTCACCTAGAAAGAAATAAAGGACTTTTTTCAGAAGATTACAGTGAAACTCATTATTCCCCTGATGGCAGAGAAATTACAACCACCCCTCCAGTTCAGGAACACTGCTATTATCATGGTTACATTCAGAATGATGCTGACTCAACTGCAGTCATCAGTGCATGCGACGGCTTGAAAGGACAT…	MIQALLITICLAVFPYQGNSIILEFGNVNDYEVVYPQKVPVLPKGGLQNAEPESKYEDTIQYEFQVNGEPVVLHLERNKGLFSEDYSETHYSPDGREITTTPPVQEHCYYHGYIQNDADSTAVISACDGLKGHFKHQGETYFIEPLKPFSNSEAHAVYKYDSLEKEDETHKTCGVTQTTWESDEPIESPQLMVTPEQLRYLNARKYIELFIVVDNVMFRKYTGNLAAIRTRVYEIVNSLNMIYRALNIHVALIGIEIWSIQDQINVQSAVNVTLDLFGAWRETVLLPRRNHDNAQLLTGINFDGQTVGFGYVGGLCLRKQSAAIVQDHSKIASLVATTMAHEMGHNLGINHDTASCTCQPNTCIMSAILGFQPSYQFSSCSYQEHQRYLIRVLPQCILN…	snake venom metalloprotease [Philodryas olfersii]	ACS74986.1	99.68
	SB0001_POLFSVMPIII001	Putative percursor of snake venom Metalloproteinase P-III Class	ATGATCCAAGCTCTCTTGGTAACTATAAGCTTAGTGGTTTTTCCATGTCAAGGGAACTCGATAAAACTGGAATCCGGGAATGTTAATGATTATGAAGTAGTGTATCCACAAAAAACGCCTATATGGCCCAGAGGAGGATTTCAGAATGCTGAGCCAGAGACCAAGTATGAAGATACAATGCAGTATGAATTTCAAGTGAATGGAGAGCCAGTGGTCCTTCATCTAGAAAGAAATAAAGGACTTTTTTCAGAAGATTACAGTGAAACTCATTATTCCCCTGATGGCAGAGAAATTACAACCACCCCTCCAGTTGGGAATCACTGCTATTATCATGGACACATCCAGAATGAAGCTGACTTAACTGCAGTCATCAGTGCATGTGACGGCTTGAAAGGACAT…	MIQALLVTISLVVFPCQGNSIKLESGNVNDYEVVYPQKTPIWPRGGFQNAEPETKYEDTMQYEFQVNGEPVVLHLERNKGLFSEDYSETHYSPDGREITTTPPVGNHCYYHGHIQNEADLTAVISACDGLKGHFKHQGETYFIEPLKLSNSEAHAVYKYDSLEKEGETHKTCGVTQTTWELDEPIEKSPQVPFTPKEQNTYLNAKKYIEFFIAVDNGMFRKYSSNLTAIRTRVYEIVNIVNTIYRPLNIHVALIGLVIWSNRDRINVQSAANVTLDLFGTWRETDLLQRRRNDNAQLITSIDFDGPTVGLGYVGTLCRPKHSSAIVQDHSDLTSLMASTMAHELGHNLGINHDTSACQCSSNACVMSPTIGSVPYYQFSSCSIQEHRSYLTRAQPQCIL…	venom metalloprotease precursor [Philodryas chamissonis]	AJB84503.1	91.16
Snake Venom Serinoproteinase (SVSP)	SB0001_POLFSVSP002	Putative percursor of snake venom Serinoproteinase	ATGGCGCTGATCGGAGTGCTTGCAAACCTTCTGATACTATGCCTTTCTTACGCAAGAACCGCTCCTGATCGGATCATTGGAGGCTTGGAATGTAACCAAAATGAACATCGTTCCCTTGTACTCTTATATAACTCTGGAGGGTTTTTCTGCTCTGGGACCTTGATTAACCACGAATGGGTGCTCACTGCTGCACACTGCAACAGAGAAAATATCCAGATAAAGCTTGGTGTGCATAACATACATGTACCCAATGAGGATGAGCAGATAAGAGTCCCGAAGGAGAAGGTGTGTTGTCTCGGTACCATGAACTGTACCCAATGGAACCAGGACATCATGTTGATCAGGCTGAACAGTTCTGTTAACTATAGTACACACATCGCACCGCTCAGCTTGCCCTCC…	MALIGVLANLLILCLSYARTAPDRIIGGLECNQNEHRSLVLLYNSGGFFCSGTLINHEWVLTAAHCNRENIQIKLGVHNIHVPNEDEQIRVPKEKVCCLGTMNCTQWNQDIMLIRLNSSVNYSTHIAPLSLPSNPPSVGSVCRVMGWGTITSPEVTYPEVPHCVNIQILHKELCEAAYPILLGNSNILCAGKLLGDKDSCKGDSGGPLICNGQIQGIVSWGGFPCAQILEPGVYTKVFDYIDWIQDIMAGNANVICPGDNF	RecName: Full=Snake venom serine protease; Short=SVSP; Flags: Precursor [Philodryas olfersii]	Q09GK1.1	100.00
	SB0001_POLFSVSP001	Putative percursor of snake venom Serinoproteinase	ATGGCGCTGATCGGAGTGCTAGCAAACCTTCTGATACTATGCCTTTCTTACGCAAGAACCGCTCCTGATCGGATCATTGGAGGCTTGGAATGTAACCAAAATGAACATCGTTCCCTTGTACTCTTATATAACTCTGGAGGGTTTTTCTGCTCTGGGACCTTGATTAACCACGAATGGGTGCTCACTGCTGCACACTGCAACAGAGAAAATATCCAGATAAAGCTTGGTGTGCATAACATACATGTACCCAATGAGGATGAGCAGATAAGAGTCCCGAAGGAGAAGGTGTGTTGTCTCGGTACCATGAACTGTACCCAAATGAACCAGGACATCATGTTGATCAGGCTGAACAGTTCTGTTAACAATAGTCCACACATCGCACCGCTCAGCTTGCCCTCC…	MALIGVLANLLILCLSYARTAPDRIIGGLECNQNEHRSLVLLYNSGGFFCSGTLINHEWVLTAAHCNRENIQIKLGVHNIHVPNEDEQIRVPKEKVCCLGTMNCTQMNQDIMLIRLNSSVNNSPHIAPLSLPSNPPSMGSDCRVMGWGTITSPEVTYPEVPHCVNIQILYNEVCEAAYPILSGKSNILCAGELEGGKDSCKGDSGGPLICNGQIQGIVSWGHFHCGQVLEPGVYTKVFDYIDWIQGIMAGNANVICPGENVSE	RecName: Full=Snake venom serine protease; Short=SVSP; Flags: Precursor [Philodryas olfersii]	Q09GK1.1	92.69
Vascular Endothelial Growth Factor (VEGF)	SB0001_POLFVEGF001	Putative percursor of snake venom vascular endothelial growth factor	ATGAACTTTCTGCTCACTTGGATCCACTGGGGGTTGGCGGCGCTGCTTTATTTCCACAACGCCAAGGTGTTGCAGGCTGCTCCTGCCCAGGGAGATGGAGAGAGGCAACAAGGTGAAGTTATCTCATTTATGAAGGTCTATGAGCGCAGTGCCTGCAGGGCAATTGAGACCATGGTAGATATTTTCCAGGAGTATCCTGATGAGGTGGAATACATCTTCAAGCCATCCTGTGTGGCCCTGATGAGATGTGCAGGATGCTGTAATGATGAAGCACTAGAATGTGTGCCTACAGAGGTGTACAATGTCACAATGGAGATCATGAAACTCAAACACTTTCAGAGCCAGCATATACATCCGATGAGCTTCCTGCAGCACAGTAGATGTGAATGCAGACCAAAG…	MNFLLTWIHWGLAALLYFHNAKVLQAAPAQGDGERQQGEVISFMKVYERSACRAIETMVDIFQEYPDEVEYIFKPSCVALMRCAGCCNDEALECVPTEVYNVTMEIMKLKHFQSQHIHPMSFLQHSRCECRPKKEVRIRQENHCEPCSERRKHLYKQDPLTCKCSCKFTDSRCKSKQLELNERTCRCEKPRR	vascular endothelial growth factor 1, partial [Borikenophis portoricensis]	AXL96597.1	97.40
Waprin Protein (WAP)	SB0001_POLFWAP003	Putative percursor of snake venom Waprin	ATGAAACCTTGGATTCTCCTCCTCCTAGCTGGTCTCCTCATTCTTTCAACTCAGCTAACAACAGCAAAGACCACCAAACAACTTCGCCTTCCAAAAGTCAAGCCAGGCGAGTGTCCCAAAGTCAAAATCCCTCCTGACTACCCTTGTAACCAATACTGTGTCTGGGACTTCGATTGCGAAGGGAATAAGAAATGCTGCCCAGTTGGATGCGCCAAGGAGTGTTTCCCCCCAGGACCACTCTGA	MKPWILLLLAGLLILSTQLTTAKTTKQLRLPKVKPGECPKVKIPPDYPCNQYCVWDFDCEGNKKCCPVGCAKECFPPGPL	RecName: Full=Waprin-Phi3; Flags: Precursor [Philodryas olfersii]	A7X4M7.1	100.00
	SB0001_POLFWAP002	Putative percursor of snake venom Waprin protein	ATGACGCTCAGGAGAGGCAGCTGCCCCCTCCTCCTCTTCTCCCTGGTGGGTCTCCTCACGACCTGTGCTCAGGAGCCCGACGCGGCTGGACAGAACACCACAGCGGTCGCGGAGAAAGCTGGCACCTGTCCCCAGGCAGAGTTGGAGATGCCCGATAGGAACTGCACCGAGGCGTGCCAGTCCGATGCCGGCTGCGAGGAGAACAAGAAGTGCTGCCGGACAGGATGTGGGACTTCCTGCCAAATCCCAGACGAGAAACCCGGGTCCTGCCCAAATGTGGACATGCCCATCCCGCCTCTGGGTCTTTGCAAAACCACGTGTAGTAAGGATTCAGACTGTTCAGAGACGAAGAAATGCTGCAAAAATGGCTGCGGGTTTATGACTTGTACAACGGCCAGG…	MTLRRGSCPLLLFSLVGLLTTCAQEPDAAGQNTTAVAEKAGTCPQAELEMPDRNCTEACQSDAGCEENKKCCRTGCGTSCQIPDEKPGSCPNVDMPIPPLGLCKTTCSKDSDCSETKKCCKNGCGFMTCTTARP	RecName: Full=Waprin-Phi1; Flags: Precursor [Philodryas olfersii]	A7X4K1.1	99.25
	SB0001_POLFWAP001	Putative percursor of snake venom Waprin protein	ATGAAACCTTGGGTTCTACTTCTCCTAGCTGGTCTCCTCATTCTTTCAACTCAACAGACATCGGCAAAGCCCAAAAGAAGTCATTACGAAATAGTCAAACCGGGTGAGTGTCCCATGTTCAAAATCTCTCCTGACCTTCCATGTGACCAAAACTGTCAGTGGGACTCTAACTGCAAAGGGAATATGAAATGCTGCCCGATGGGATGTGCCAGGGTCTGTTTTCCCCCAGGACCACTCTGA	MKPWVLLLLAGLLILSTQQTSAKPKRSHYEIVKPGECPMFKISPDLPCDQNCQWDSNCKGNMKCCPMGCARVCFPPGPL	RecName: Full=Waprin-Phi3; Flags: Precursor [Philodryas olfersii]	A7X4K1.1	68.75

## Sheet: P. AGASSIZII
Table S2. Identification and annotation of transcripts of putative toxins from the venom glands of Philodryadini snakes.
Philodryas agassizii
Toxin group	Sequence code	Annotation	Nucleotide sequence	Amino acid sequence	BLAST identification	Accession number	Identity %
C-type Lectin (CTL)	SB0183_PASZCTL009	Putative percursor of snake venom C-type Lectin	ATGGGGCGATTCATCTTTGTGAGTCTCGGCTTGCTGGTTCTGGCTTTTTCCCTGAGTGGAATTGGAGCTGATCAACGTTGTCCCTCCGGTTGGTTCTCCCACAATGTGTCTTGCTACAAGCTCATCAACGATGTGGAAGAGGCAGTGAAGTTGTCCGACGAGATCTCCAAAACATGGAGTATTATTGATGTCTGGATTGGATTGAGGTTTTCAAAGAGAAAAAGCATCTGGGAGTGGAGTGATGGCTCCAATGTGACCCAGACACGCTGGGAAGAAGGAGAACCCAACAACTTTTTGAAGAATGAGTTCTGTGTTGTACTGACAGTCAGATCACGATATCTCAAATGGAACGATAAGGACTGCAATCGCCGGCATCGTTTTCTCTGCAAGTTCTAG	MGRFIFVSLGLLVLAFSLSGIGADQRCPSGWFSHNVSCYKLINDVEEAVKLSDEISKTWSIIDVWIGLRFSKRKSIWEWSDGSNVTQTRWEEGEPNNFLKNEFCVVLTVRSRYLKWNDKDCNRRHRFLCKF	RecName: Full=C-type lectin lectoxin-Phi1; Short=CTL; Flags: Precursor [Philodryas olfersii]	A7X406.1	79.49
	SB0183_PASZCTL008	Putative percursor of snake venom C-type Lectin	ATGGGGCGATTCATCCTTCTGACCCTCGGCTTGCTGGTCGTGGCTTTCTCCCTTAATGGAATTGGAGCTGATCACCCTTGCCCCACGGGCTGGTCCTCCTTTGAACACTTTTGCTACAAGTTCTTCAAACTACGGAAGACCTGGGAAGAGGCAGAGACGTTCTGCGTCCAAGAGCAGAATGGCAGCCATCTCATCTCCATCCAAAGCTGGGCAGAGTCAGCTTACGTGGCCAGGCTGGTCTCCAGAAATACGCTCTTCTCCATTGTCTGGATCGGACTGAAGGATCCAGAGAAAAATGGCACCTGGGAATGGAGTGATGGCTCCAACTTCAGTTACACATCCTGGCAAATAAGGCAACCTAACAATGGTGATGATAAGGACTACTGCGTTGTGCTATCC…	MGRFILLTLGLLVVAFSLNGIGADHPCPTGWSSFEHFCYKFFKLRKTWEEAETFCVQEQNGSHLISIQSWAESAYVARLVSRNTLFSIVWIGLKDPEKNGTWEWSDGSNFSYTSWQIRQPNNGDDKDYCVVLSRWSGYLGWKVVNCESRSFFVCKFQPKSDGST	RecName: Full=C-type lectin lectoxin-Lei1; Short=CTL; Flags: Precursor [Leioheterodon madagascariensis]	A7X401.1	63.87
	SB0183_PASZCTL007	Putative percursor of snake venom C-type Lectin	ATGGGGCGATTCATCTTTGTGAGTCTCGGCTTGCTGGTTCTGGCTTTTTCCCTGAGTGGAATTGGAGCTGATCAACGTTGTCCCTCCGGTTGGTTCTCCCACAATGTGTCTTGCTACAAGCTCATCAACAATTGGAAGACCTGGGACGAAGCGCAGAGGTTCTGCATGGACGAGCAGGAAAACGGCCAACTGGCCTCCATCAACGATGTGGAAGAGGCAGTGAAGTTGTCCGACGAGATCTCCAAAACATGGAGTATTATTGATGTCTGGATTGGATTGAGGTTTTCAAAGAGAAAAAGCATCTGGGAGTGGAGTGATGGCTCCAATGTGACCCAGACACGCTGGGAAGAAGGAGAACCCAACAACTTTTTGAAGAATGAGTTCTGTGTTGTACTGACA…	MGRFIFVSLGLLVLAFSLSGIGADQRCPSGWFSHNVSCYKLINNWKTWDEAQRFCMDEQENGQLASINDVEEAVKLSDEISKTWSIIDVWIGLRFSKRKSIWEWSDGSNVTQTRWEEGEPNNFLKNEFCVVLTVRSRYLKWNDKDCNRRHRFLCKF	RecName: Full=C-type lectin lectoxin-Phi1; Short=CTL; Flags: Precursor [Philodryas olfersii]	A7X406.1	94.87
	SB0183_PASZCTL006	Putative percursor of snake venom C-type Lectin	ATGGGGCGATTCATCTTTATGAGCCTCGGCTTGCTGGTTCTGGCTTTTTCCCTGAGTGGAATTGGAGCCGATCAACGTTGTCCCTCCGGTTGGTCCTCCCACAATGTGTCTTGCTACAAGTTCTTCGACGACTGGATGACCTGGGACGAAGCGCAGAGGTTCTGCATGGACGAGCAGGAAAACGGCCAACTCGCCTCCATCAAAGATCTAGAAGAGGCAGTGAAGTTGTCCTACCTGATCTCCAAAGCAAGGAGTATTTTCGATGTCTGGATTGGATTGAGGCTTTCAAAGAGAAAAGGCATCTGGGAGTGGATTGATGGCTCCAATGTGACCCAGACACGCTGGGAAGAAGGAGAACCCAACAACGTTTTGAAGAAGGAGTTCTGTGCTATACTGACA…	MGRFIFMSLGLLVLAFSLSGIGADQRCPSGWSSHNVSCYKFFDDWMTWDEAQRFCMDEQENGQLASIKDLEEAVKLSYLISKARSIFDVWIGLRLSKRKGIWEWIDGSNVTQTRWEEGEPNNVLKKEFCAILTSRSHYLKWNNTNCRDWHPFVCKFQPPREASGC	RecName: Full=C-type lectin lectoxin-Phi1; Short=CTL; Flags: Precursor [Philodryas olfersii]	A7X406.1	81.41
	SB0183_PASZCTL005	Putative percursor of snake venom C-type Lectin	ATGGGGCGATTCATCTTTATGAGCCTCGGCTTGCTGGTTCTGGCTTTTTCCCTGAGTGGAATTGGAGCCGATCAACGTTGTCCCTCCGGTTGGTCCTCCCACAATGTGTCTTGCTACAAGTTCTTCGACGACTGGATGACCTGGGACGAAGCGCAGAGTACTAACATGCATGAATTTAACTCAAGAGCTGTTCAAGAGCTGCAGACTCCAAGGTTCTGCATGGACGAGCAGGAAAACGGCCAACTCGCCTCCATCAAAGATCTAGAAGAGGCAGTGAAGTTGTCCTACCTGATCTCCAAAGCAAGGAGTATTTTCGATGTCTGGATTGGATTGAGGCTTTCAAAGAGAAAAGGCATCTGGGAGTGGATTGATGGCTCCAATGTGACCCAGACACGCTGG…	MGRFIFMSLGLLVLAFSLSGIGADQRCPSGWSSHNVSCYKFFDDWMTWDEAQSTNMHEFNSRAVQELQTPRFCMDEQENGQLASIKDLEEAVKLSYLISKARSIFDVWIGLRLSKRKGIWEWIDGSNVTQTRWEEGEPNNVLKKEFCAILTSRSHYLKWNNTNCRDWHPFVCKFQPPREASGC	RecName: Full=C-type lectin lectoxin-Phi1; Short=CTL; Flags: Precursor [Philodryas olfersii]	A7X406.1	72.99
	SB0183_PASZCTL004	Putative percursor of snake venom C-type Lectin	ATGGAGCGATTCATCTTTGGAGTCTTGCTGGCTGTGGCCCTCTCCCTAACTGGAACTGGAGCTGATCCTCAATGTCCCTCCGGTTGGCCCTCCTATAATGGGCATTGCTACAAAGTCTTCAAACAATTCAAAAGCTGGGGCGACGCAGAGATGTTCTGCAGTCGAGAGGAGGAAGGGGGCCATCTCGCCTCCATCCAAAGCAAGCCAGAGGCAGATTTTGTGGCCAAGGTGGTCTCCCGCCATGTTCTCCTTTTCAGTGTCTGGATCGGGCTGAGTGCGCAATGGAAACAACGCATCTGGAGGTGGAGTGATGGCTCCAGCTTCCGCTACAAATCCTGGGCACTAGGAGAACCCAACAACTTTCTTTGGAACGAGTACTGCGTTGTGCTGGCGAGCCTG…	MERFIFGVLLAVALSLTGTGADPQCPSGWPSYNGHCYKVFKQFKSWGDAEMFCSREEEGGHLASIQSKPEADFVAKVVSRHVLLFSVWIGLSAQWKQRIWRWSDGSSFRYKSWALGEPNNFLWNEYCVVLASLSGYRRWNDQSCGSKHYFICKFQPQGEGSTW	RecName: Full=C-type lectin lectoxin-Lio1; Short=CTL; Flags: Precursor [Erythrolamprus poecilogyrus]	A7X3Z4.1	69.94
	SB0183_PASZCTL003	Putative percursor of snake venom C-type Lectin	ATGGGACGATTCATCCTTCTGACCCTCGGCTTGCTGGTCGTGGCTTTCTCCCTAAATGGAGCCAAAGGCTGTTGTTGTCCCCAAGATTGGCTCCCCATGAATGGGTTTTGCTACAAGGTCTTCAATGACCTCAAGACCTGGAACGACGCCGAGATGTTCTGCAGGAAACACAAGCCAGGATGCCACCTCGCCTCCATCAATGACAGTGAAGAGTCATATGACTTGGCTGAATATGTTTCCGACTATCTCAGAAGTGGCGGAAATGTCTGGATTGGATTGAGTGACCAAGAGCAACAAGGCAATTGGCAGTGGACAGACAGATCCAATAGCAGGTACCTGACGTGGAAGCAAGGAGAGCCCAACAACAAAGGGAACAAGGAATATTGCGTTGAGCTTTGG…	MGRFILLTLGLLVVAFSLNGAKGCCCPQDWLPMNGFCYKVFNDLKTWNDAEMFCRKHKPGCHLASINDSEESYDLAEYVSDYLRSGGNVWIGLSDQEQQGNWQWTDRSNSRYLTWKQGEPNNKGNKEYCVELWSPLGYKQWNDENCASTRAYLCKCRF	C-type lectin 3, partial [Ahaetulla prasina]	AXL96600.1	81.01
	SB0183_PASZCTL002	Putative percursor of snake venom C-type Lectin	ATGGGACGATTCATCCTTCTGACCCTCGGCTTGCTGGTCGTGGCTTTCTCCCTAAATGGAGCCAAAGGCTGTTGTTGTCCCCAAGATTGGCTCCCCATGAATGGGTTTTGCTACAAGGTCTTCAATGACCTCAAGACCTGGAACGACGCCGAGATGTTCTGCAGAAAACACAAGCCAGGCTGCCACCTCGCCTCCATCAATGACAGTGAAGAGTCATATGACTTGGCTGAATATGTTTCCGACTATCTCAGCAGTGGCGGAAATGTCTGGATTGGATTGAGTGACCAAGAGCAACAAGGCAATTGGCAGTGGACAGACAGATCCAATAGCAGGTACCTGACGTGGAAGCAAGGAGAGCCCAACAACAAAGGGAACAAGGAATATTGTGTTGAGCTTTGG…	MGRFILLTLGLLVVAFSLNGAKGCCCPQDWLPMNGFCYKVFNDLKTWNDAEMFCRKHKPGCHLASINDSEESYDLAEYVSDYLSSGGNVWIGLSDQEQQGNWQWTDRSNSRYLTWKQGEPNNKGNKEYCVELWRLSGYKQWNDENCASTRAYLCKCRF	C-type lectin 3, partial [Ahaetulla prasina]	AXL96600.1	82.28
	SB0183_PASZCTL001	Putative percursor of snake venom C-type Lectin	ATGGAGCGATTCATCTTTGGAGTCTTGCTGGCTGTGGCCCTCTCCCTAACTGGAACTGGAGCTGATCCTCAATGTCCCTCCGGTTGGTCCTCCTATAATGGGCATTGCTATAAAGTCTTCAAACAATTCAAAAGCTGGGGCGACGCAGAGATGTTCTGCAATCGAGAGGAGGAAGGGGGCCATCTCGCCTCCATCCAAAGCAAGCCAGAGGCAGATTTTGTGGCCAAGCTGGTCTCCCGCCATGTCCTCCTTTTCAATGTCTGGATCGGGCTGAGTGCGCAATGGAAACAACGCATCTGGAGGTGGAGTGATGGCTCCAGCTTCCGCTACAAATCCTGGGCACTAGGAGAACCCAACAACTTTCTTTGGAACGAGTACTGCGTTGTGCTGGCGAGCCTG…	MERFIFGVLLAVALSLTGTGADPQCPSGWSSYNGHCYKVFKQFKSWGDAEMFCNREEEGGHLASIQSKPEADFVAKLVSRHVLLFNVWIGLSAQWKQRIWRWSDGSSFRYKSWALGEPNNFLWNEYCVVLASLSGYRRWNDQSCGSKHYFICKFQPQGEGSTW	RecName: Full=C-type lectin lectoxin-Lio1; Short=CTL; Flags: Precursor [Erythrolamprus poecilogyrus]	A7X3Z4.1	71.78
C-type Natriuretic Peptide (CNP)	SB0183_PASZCNP001	Putative percursor of snake venom C-type natriuretic peptide	ATGTTCGCCTCCCGTCTGGCGGCCGGCGGGCTGCTCTTGCTGGCCCTGCTGGCTCTGGCCCTCGACGGCAAGCCGGCGCCCCCGCAGCCGCTGCGCAAGGCTCCGGCGGGTGGCACGACGGCGTGGCGGCGGGAGCTGACGGAGCAGCCGGAGGGGGCGTCGCGTCCCGCGGCTGGAGGCGGCGGCCGCAGCGGCTCCAAGGCGGCCAATGCGGCCCCGACGGCACCGAAGAGCAAAGGGGGGGCGGCGGCGGCGGCGGCGGCGCGGCTGATGCGGGATTTGCGCCCCGACAGCAAGCAGGCGCGGGCCGCCTGGGGCCGGATGGTGCACCCCGAGCATCACGCAGGAGGCGGCGGCGGCGGTGGAGGCGGCGGCGGCGGCGGAGCCTCGCGTCGTCTG…	MFASRLAAGGLLLLALLALALDGKPAPPQPLRKAPAGGTTAWRRELTEQPEGASRPAAGGGGRSGSKAANAAPTAPKSKGGAAAAAAARLMRDLRPDSKQARAAWGRMVHPEHHAGGGGGGGGGGGGGASRRLKGVAKKGLGKGCFGLKLDRIGSMSGLGC	RecName: Full=C-type natriuretic peptide; Short=CNP; Flags: Precursor [Philodryas olfersii]	Q09GK2.1	95.81
Cysteine-rich secretory protein (CRISP)	SB0183_PASZCRISP001	Putative percursor of snake venom Cysteine-rich secretory protein	ATGATTGTCTTCATCTTGCTAAGTCTTGCTGCAGTGCTGCAACAGTCTTTTGGACTTGTTGATTTTGATTCTGAGTCACCCAGGAGACCAGAAATACAAAGGGTGATTGTTGACACGCACAATTCTTACAGAAGAACTGTCAGTCCAACTGCTAGCAACATGCTAAGAATGGAATGGTATGCTGAAGCTGCTGCAAATGCAGAACGTTGGGCGTCTCTATGTGCTTATGGTCACAGCCAAAATTCTGACAGAGTTCTTGATGGAATACAATGTGGTGAAAATATATACATGTCAAGTAATCCCAGGTCATGGACTGAAATAATGCAGTTGTGGTATGATGAATACAAAAATTTCATCTTTGGCGTTGGAGCAAATCCACCAGGTTCTGTTATAGGCCAT…	MIVFILLSLAAVLQQSFGLVDFDSESPRRPEIQRVIVDTHNSYRRTVSPTASNMLRMEWYAEAAANAERWASLCAYGHSQNSDRVLDGIQCGENIYMSSNPRSWTEIMQLWYDEYKNFIFGVGANPPGSVIGHYTQIVWYKSYRVGCAAYYCPSSLYNYFYVCQYCPAGNFAGRTATPYNSGPTCGDCPSACDNGLCTNPCTKKNEFTNCNDLVQQSSCQDDWIKSNCAATCFCKNKII	RecName: Full=Cysteine-rich venom protein; Short=CRVP; AltName: Full=CRISP-PHI1; AltName: Full=CRISP-PHI2; AltName: Full=Cysteine-rich secretory protein; Flags: Precursor [Philodryas olfersii]	Q09GJ9.1	96.23
Kunitz-type protein (KUNZ)	SB0183_PASZKUNZ002	Putative percursor of snake venom Kunitz-type protein	ATGTGGGCCAGGGTCCTTCTCCTGGGGGTGCTCCTCTCCCTCCTTGCTGACCTCCATGCTGCCAGTGGTGGAGATGCTGGGGGTCAAAAGACCTGGAATCCTCGGAACAAGGTTTGCAAACTCCCAGCAGATTCAGGACCTTGTGAAGGATATTCAAAACAGTATTATTACAACTGGAAGACCAAAAAGTGTGAAACATTTGTTTATGGATTATGTGGTGGCAACGACAATCGCTTCTCCACAAAACTGGAATGCCAAATGGTCTGTGGTGGATTCGGGCAAATGCAACCCTCTACGGCCTGA	MWARVLLLGVLLSLLADLHAASGGDAGGQKTWNPRNKVCKLPADSGPCEGYSKQYYYNWKTKKCETFVYGLCGGNDNRFSTKLECQMVCGGFGQMQPSTA	hypothetical protein L345_15738, partial [Ophiophagus hannah]	ETE58538.1	55.21
Ku-wap-fusin protein (KUWAP)	SB0183_PASZKUWAP003	Putative percursor of snake venom Ku-wap-fusin protein	ATGTGGGCCAGGGTCCTTCTCCTGGGGGTGCTCCTCTCCCTCCTTGCTGACCTCCATGCTGCCAGTGGTGGAGATGCTGGGGGTCAAAAGACCTGGAATCCTCCGAACAACGACTGTGAGCTCCCTCCAGAGAAAGGTCCCTGTAACAATTTAGAACTTCGCTGGTTCTACAACTCAAAGTCCAAGAGATGCGAACGTTTCTTCTATGGAGGCTGCTATGGAAATGCTAACAACTTCAAGGAGATCAATGAATGTGACCGCCGTTGTGTCTCCCCAGATATCAACAAGCCTGGCATCTGTACCAAGCCAATTAGTCCCAATGACAAAATTTGTGGCAAATTCTGCTCCAACGATGCCAGCTGCCCGGGCACTCAGCGCTGCTGTGCAACGTCTTGTGGG…	MWARVLLLGVLLSLLADLHAASGGDAGGQKTWNPPNNDCELPPEKGPCNNLELRWFYNSKSKRCERFFYGGCYGNANNFKEINECDRRCVSPDINKPGICTKPISPNDKICGKFCSNDASCPGTQRCCATSCGQQCQLPEGENSGYCPLLIRPPSNKGSPLCFGNCTRDQECNVRSSPPWKKCCPFGDRKICVEEVEEHPGVCPRRVEVQPFVPCNHTCGDDHDCPLTEKCCFTGCSRGCLPSVRSDRCQLPQDQGSCSKELQRFYYDPEKKRCISFVYCGCEGNSNNFETKELCEKACGKISKEVCKLPADSGPCLGYSIQYYYNWKTKKCETFVYGLCRGNDNRFSTKLECQMVCEGFDQQQQQQPKE	papilin-like [Pseudonaja textilis]	XP_026580479.1	77.56
	SB0183_PASZKUWAP001	Putative percursor of snake venom Ku-wap-fusin protein	ATGTGGGCCAGGGTCCTTCTCCTGGGGGTGCTCCTCTCCCTCCTTGCTGACCTCCATGCTGCCAGTGGTGGAGATGCTGGGGGTCAAAAGACCTGGAATCCTCCGAACAACGACTGTGAGCTCCCTCCAGAGAAAGGTCCCTGTAACAATTTAGAACTTCGCTGGTTCTACAACTCAAAGTCCAAGAGATGCGAACGTTTCTTCTATGGAGGCTGCTATGGAAATGCTAACAACTTCAAGGAGATCAATGAATGTGACCGCCGTTGTGTCTCCCCAGATATCAACAAGCCTGGCATCTGTACCAAGCCAATTAGTCCCAATGACAAAATTTGTGGCAAATTCTGCTCCAACGATGCCAGCTGCCCGGGCACTCAGCGCTGCTGTGCAACGTCTTGTGGG…	MWARVLLLGVLLSLLADLHAASGGDAGGQKTWNPPNNDCELPPEKGPCNNLELRWFYNSKSKRCERFFYGGCYGNANNFKEINECDRRCVSPDINKPGICTKPISPNDKICGKFCSNDASCPGTQRCCATSCGQQCQLPEGENSGYCPLLIRPPSNKGSPLCFGNCTRDQECNVRSSPPWKKCCPFGDRKICVEEVEEHPGVCPRRVEVQPFVPCNHTCGDDHDCPLTEKCCFTGCSRGCLPSVRSDRCQLPQDQGSCSKELQRFYYDPEKKKCISFVYRGCEGNSNNFETKELCEKACGKISKEVCKLPADSGPCLGYSIQYYYNWKTKKCETFVYGLCRGNDNRFSTKLECQMVCEGFGKEQE	papilin-like [Pseudonaja textilis]	XP_026580479.1	77.90
	SB0183_PASZKUWAP002	Putative percursor of snake venom Ku-wap-fusin protein	ATGCAGCCCGAGTGTGGGGAAGACGGCTTCACCATGTCTTCTGGAGGTCTTCTTCTCCTGCTGGGACTCCTCACCCTCTGGGCAGAGCTGACCCCCGTCTCCAGCCAGGACCGGCCAGAGCTCTGTTACCTTCCGGTGGACACTGGACCATGTAAAGCCAAATTTCCTCGCTTCTACTACAACTCGGCTTCAAATAAATGCCAAGAGTTTATTTATGGTGGATGCCAGGGCAATGCCAACAATTTTGAGACCAAAGATGAATGCCACTTCACCTGTGTTGAAAAGCCTGGTGTGTGTCGCAAGGCCCCTCCAGGCACAAGCACTATTTGTATTGTGAACTGTAAAAATGACTGGAAATGCCCCGGGAGGCAGAAGTGCTGCAGTTATGCTTGCATGGTT…	MQPECGEDGFTMSSGGLLLLLGLLTLWAELTPVSSQDRPELCYLPVDTGPCKAKFPRFYYNSASNKCQEFIYGGCQGNANNFETKDECHFTCVEKPGVCRKAPPGTSTICIVNCKNDWKCPGRQKCCSYACMVDCMDPI	kunitz/BPTI-like toxin [Pantherophis guttatus]	XP_034280079.1	86.72
Phospholipase A2 inhibitor (iPLA)	SB0183_PASZiPLA001	Putative percursor of snake venom phospholipase A2 inhibitor	ATGAAGCATCTTCTTATTTTCACTGCTTTGATAATTACAGCAACTGATGCTGAACTGACCTGCGCATGTTCTGAACCAACGACTGGACCAGCATGCGTCGCGGCAAATACTTGTACTATCCCAAAGGGACAATGTTATTCAATTCAGAGGCAAATTGCTACCGAGAAAGATAAGTCAGCCAATGGAACAAGTAAAGGCTGCCAAGAAGACAAAGATCCTAAGGTCTGCAATGAAGGGGTTGTATTCATTTCGACTGAGAATGTTTTTTATCTGCTGAGCAATGTTACATGCTGTGACAAAAATGAATGCAACAAAGATGTCGTTGTAGAACTTCCAGAAGTTTCAACCCTTACGACTCTTTCCAGCAAAAAGCTGGTTTGCCCATCATGCTTTACTTCG…	MKHLLIFTALIITATDAELTCACSEPTTGPACVAANTCTIPKGQCYSIQRQIATEKDKSANGTSKGCQEDKDPKVCNEGVVFISTENVFYLLSNVTCCDKNECNKDVVVELPEVSTLTTLSSKKLVCPSCFTSDKKECDAKQMNCSEGQDKCFTIIGTITKGGKTSDFIAKGCAAQSAILKNGTTLTFGDASYKLNTVEVVEAKGGVSQISSCLSFAILLPSILWFLLDSSLY	phospholipase A2 inhibitor and Ly6/PLAUR domain-containing protein-like [Pseudonaja textilis]	XP_026571254.1	63.29
Phospholipase B (PLB)	SB0183_PASZPLB001	Putative percursor of snake venom Phospholipase B	ATGGTCGGCTACGGCATCGCCGCCTCCTCGGACAATCGCCGCCTGCGATGCTGGAGCTGGTACTGGGGGGGACTTTTACTTCTCTGGGCCGTGGCAGAAACTCGAGCAGATCTCCACTATGCTACTGTATATTGGTTGGAAGCTGAAAAATCTTTCCAAGTTAGGGATGTATTAGACAAGAATGGTGATGCTTATGGCTATTACAATGACACTGTACAATCTACTGGATGGGGGATACTTGAGATCAAAGCAGGCTACGGTAACCAGCCCGTAAGCAATGAAATACTCATGTACGCTGCAGGTTTCTTGGAAGGCTACCTCACTGCTTCACGTATGAGTGACCATGTTGCAAATCTATATCATCAGCTGATTAAGAATGTCATCATTGAACAAAAAGTA…	MVGYGIAASSDNRRLRCWSWYWGGLLLLWAVAETRADLHYATVYWLEAEKSFQVRDVLDKNGDAYGYYNDTVQSTGWGILEIKAGYGNQPVSNEILMYAAGFLEGYLTASRMSDHVANLYHQLIKNVIIEQKVKDFMKKQDEWTRQQIKNNKDDPFWRNAGYIIAQLDGLYMGNVEWAKRQKRTPLTDFEISFLNAIGDLLDLIPALISDSRNNDFLSLREISRMYQWDMGHCSALIKVLPGYENIYFAHSSWFTYAATLRIYKHWDFRIIDPQTKTGRASFSSYPGFLVSLDDFYILGSGLIMLQTTNSVFNLSLLKQVVPESLFAWERVRIANMMADSGKSWAQTFEKENSGTYNNQYMILDTKKVKLQRSIDDGTLYIIEQVPNLVKYSDQTDILR…	phospholipase B1, partial [Borikenophis portoricensis]	AXL96594.1	94.94
Snake Venom Coagulation Factor X (FAXV)	SB0183_PASZFAXV001	Putative percursor of snake venom coagulation factor X	ATGGCTCCTCAGCTACTCCTCTGTCTGATCCTCACTTTTCTGTGGAGTCTCCCAAAGGCTGAAAGTAATGTATTCTTAAAAAGCAAACTGGCAAATAGATTTTTGCAAAGAACGAAACGAGCTAATTCAATATTTGAGGAATTTAAACCAGGAAACATTGAAAGGGAATGCATTGAAGAGAGATGCTCAAAAGAAGAAGCCAGGGAGGCATTTGAAGATCAAGAGAAAACTGAGAACTTCTGGAATGTTTATGTTGATGACGATCAGTGTTTATCAAACCCCTGTCATTATGGTGGGACATGCAAAGACGGCATTGGTAGCTATACCTGTACCTGTTTGGCTGGCTATCAAGGGAAAAACTGTGAATATCTCATACACAAGTCCTGCAGATTGAACAAC…	MAPQLLLCLILTFLWSLPKAESNVFLKSKLANRFLQRTKRANSIFEEFKPGNIERECIEERCSKEEAREAFEDQEKTENFWNVYVDDDQCLSNPCHYGGTCKDGIGSYTCTCLAGYQGKNCEYLIHKSCRLNNGDCWHFCKLDQNEIQCSCAEGYILGDDGQSCVAGVEFPCGKITKARNKREASLPNFPEDFPDAYDEIDEDRFVETPTDFSSLVPTVQSQNETLQSISDDDSDHQGRVINGTDCKLGDCPWQALLINEIGDGFCGGTILSPIYVLTAAHCMNQTKYINVVVGEVDISRKTTGRLLAVDKIYVHQKFVLATYDYDIAIIQLKTPIQFSENVIPACLPTADFANQVLMKQDLGTVSGFGRTKERGRTSNTLKVVKLPYVDRHVCKLSSN…	coagulation factor X [Protobothrops mucrosquamatus]	XP_015674811.1	88.64
Snake venom Endogenous Matrix-Metalloproteinase 9 (seMMP-9)	SB0183_PASZSeMMP003	Putative percursor of snake venom endogenous matrix-metalloproteinase-9	ATGAGACTCCCGGTGCCGGCCTCCCTCCTCCTCCTCCTGGCGCTCCTGCCGCTGCCCTGTCCGTGGGCCGCCCCGACGGAGGAAGGGAAGGGCCCCGTAGTCATCACCTTCCCCGGGGACGCCGTCAGCCACCTGACGGACCGGGAGCTGGCCGCCCGCTACCTCCAGCGTTACGGGTACCTGACGACGACCAACCCCGGGGGGCAGGTGAAGCTGGAGACCCCCCTCAAGGCCATGCAGAAACGGCTGGGCTTGCCCGAAACAGGGGAGCTGGACGCCCCCACCCTGACGGCCATACGAGCGCCCCGCTGCGGAGTCCCGGACGTGGGTCGCTTCCAGACCTTCGAGGGCGACCTCAAGTGGGACCACACGGACCTCACTTACCGGGTGGTCAACTAT…	MRLPVPASLLLLLALLPLPCPWAAPTEEGKGPVVITFPGDAVSHLTDRELAARYLQRYGYLTTTNPGGQVKLETPLKAMQKRLGLPETGELDAPTLTAIRAPRCGVPDVGRFQTFEGDLKWDHTDLTYRVVNYSPDLDGSIIEDAFVRAFKVWSDVTPLTFTRRQEGEVDILIQFGTREHGDGYPFDGKDGFLAHAFPPGKDRFSGDAHFDDDEFWTLGTGVVVKTHFGNANGAVCHFPFIFEGKSYSSCTTEGREDGLPWCATTPNYDQDKKYGFCPNRDTAVIGGNSQGEPCSFPFKFLGQTYSSCTTDGRTDGRLWCATTSDFDEDKKWGFCPDQGYSLFLVAAHEFGHALGLEHSSIQEALMYPSYTYLADFQLHSDDIAGIQYLYGRGSGPQPT…
	SB0183_PASZSeMMP002	Putative percursor of snake venom endogenous matrix-metalloproteinase-9	ATGAGACTCCCGGTGCCGGCCTCCCTCCTCCTCCTCCTGGCGCTCCTGCCGCTGCCCTGTCCGTGGGCCGCCCCGACGGAGGAAGGGAAGGGCCCCGTAGTCATCACCTTCCCCGGGGACGCCGTCAGCCACCTGACGGACCGGGAGCTGGCCGCCCGCTACCTCCAGCGTTACGGGTACCTGACGACGACCAACCCCGGGGGGCAGGTGAAGCTGGAGACCCCCCTCAAGGCCATGCAGAAACGGCTGGGCTTGCCCGAAACAGGGGAGCTGGACGCCCCCACCCTGACGGCCATACGAGCGCCCCGCTGCGGAGTCCCGGACGTGGGTCGCTTCCAGACCTTCGAGGGCGACCTCAAGTGGGACCACACGGACCTCACTTACCGGGTGGTCAACTAT…	MRLPVPASLLLLLALLPLPCPWAAPTEEGKGPVVITFPGDAVSHLTDRELAARYLQRYGYLTTTNPGGQVKLETPLKAMQKRLGLPETGELDAPTLTAIRAPRCGVPDVGRFQTFEGDLKWDHTDLTYRVVNYSPDLDGSIIEDAFVRAFKVWSDVTPLTFTRRQEGEVDILIQFGTREHGDGYPFDGKDGFLAHAFPPGKDRFSGDAHFDDDEFWTLGTGVVVKTHFGNANGAVCHFPFIFEGKSYSSCTTEGREDGLPWCATTPNYDQDKKYGFCPSELLFTYGGNGDREKCVFPFVFEGKSYQGCTTDGRTDGYRWCATTANFDQDKKYGFCPNRDTAVIGGNSQGEPCSFPFKFLGQTYSSCTTDGRTDGRLWCATTSDFDEDKKWGFCPDQGYS…	matrix metalloproteinase-9 [Pantherophis guttatus]	XP_034280049.1	87.65
	SB0183_PASZSeMMP001	Putative percursor of snake venom endogenous matrix-metalloproteinase-9	ATGAGACTCCCGGTGCCGGCCTCCCTCCTCCTCCTCCTGGCGCTCCTGCCGCTGCCCTGTCCGTGGGCCGCCCCGACGGAGGAAGGGAAGGGCCCCGTAGTCATCACCTTCCCCGGGGACGCCGTCAGCCACCTGACGGACCGGGAGCTGGCCGCCCGCTACCTCCAGCGTTACGGGTACCTGACGACGACCAACCCCGGGGGGCAGGTGAAGCTGGAGACCCCCCTCAAGGCCATGCAGAAACGGCTGGGCTTGCCCGAAACAGGGGAGCTGGACGCCCCCACCCTGACGGCCATACGAGCGCCCCGCTGCGGAGTCCCGGACGTGGGTCGCTTCCAGACCTTCGAGGGCGACCTCAAGTGGGACCACACGGACCTCACTTACCGGGTGGTCAACTAT…	MRLPVPASLLLLLALLPLPCPWAAPTEEGKGPVVITFPGDAVSHLTDRELAARYLQRYGYLTTTNPGGQVKLETPLKAMQKRLGLPETGELDAPTLTAIRAPRCGVPDVGRFQTFEGDLKWDHTDLTYRVVNYSPDLDGSIIEDAFVRAFKVWSDVTPLTFTRRQEGEVDILIQFGTREHGDGYPFDGKDGFLAHAFPPGKDRFSGDAHFDDDEFWTLGTGVVVKTHFGNANGAVCHFPFIFEGKSYSSCTTEGREDGLPWCATTPNYDQDKKYGFCPSELLFTYGGNGDREKCVFPFVFEGKSYQGCTTDGRTDGYRWCATTANFDQDKKYGFCPNRDTAVIGGNSQGEPCSFPFRFLGQTYSSCTTDGRTDGKLWCATTSDFDEDKKWGFCPDQGYS…	matrix metalloproteinase-9 [Pantherophis guttatus]	XP_034280049.1	87.50
Snake Venom Metalloproteinase P-III Class (SVMP P-III)	SB0183_PASZSVMPIII006	Putative percursor of snake venom metalloproteinase P-III Class	ATGATCCAAGCTCTCTTGGTTACTATATGCTTAGTGGTTTTTCCATATCAAGGGAGCTCTATAAAACTGGAATCTGGGAATGTTAATGATTATGAAGTAGTGTATCCACAAAAAGTGCCTGTATTGCCCAAAGGAGGACTTCAGAATGCTGAGCCAGAGACCAAGTATGAAGATGCAATGCAATATGAATTTCAAGTGAATGGAGAGCCAGTGGTCCTTCACCTAGAAAGAAATATAGGACTTTTTTCGGAAGATTACAGTGAAACTCATTATTCTCCTGATGGCAGAGAAATTACAACCACCCCTCCAGTTCAGAATCACTGCTATTATCATGGACGCATCCAGAATGAAGCTGACTCAACTGCAGTAATCAGTGCATGTGATGGCTTGAAAGGACAC…	MIQALLVTICLVVFPYQGSSIKLESGNVNDYEVVYPQKVPVLPKGGLQNAEPETKYEDAMQYEFQVNGEPVVLHLERNIGLFSEDYSETHYSPDGREITTTPPVQNHCYYHGRIQNEADSTAVISACDGLKGHFKHQGETYFIEPLKLSNSEAHAVYKYDTLEKEDETHKICGVTQTTWELDEPIEKISQVSIIPKEQNAYLDAPKYIEFFIAVDNGMFRKYSSNLTSIRTRVYEIVNIVNTIYRALNIHVALIGLEIWSNKDQIDVQSDEHKTLKSFGEWRKTNLLPRKRNDNAQLLTSIDLNGRTIGYGYVGSICQPKHSSAIVQDHTDLTSFMATTVAHELGHNLGINHDTNACCNSNACVMSPEIGDVPYYQFSSCSIQEHQNYLTRDQPQCILN…	venom metalloprotease precursor [Philodryas chamissonis]	AJB84503.1	86.02
	SB0183_PASZSVMPIII005	Putative percursor of snake venom metalloproteinase P-III Class	ATGATCCAAGCTCTCTTGGTAACTATATGCTTAGCGGTTTTTCCATATCAAGGGAGCTCTATAATCCTGGAATTCGGGAATGTTAATGATTATGAAGTAGTGTATCCACAAAAACTGCCTGTATTGCCCAAAGGAGGACTTCAGAATGCTGAGCCAGAGAGCAAGTATGAAGATACAATACAATATGAATTTCAAGTGAATGGAGAGCCAGTGGTCCTTCACCTAGAAAGAAATAAAGGACTTTTTTCAGAAGATTACAGTGAAACTCATTATTCCCCTGATGGCAGAGAAATTACAACCACTCCTCCAGTTCAGGAACACTGCTATTATCATGGTTACATTCAGAATGATGCTGACTCAACTGCAGTCATCAGTGCATGCAACGGCTTGAAAGGACAT…	MIQALLVTICLAVFPYQGSSIILEFGNVNDYEVVYPQKLPVLPKGGLQNAEPESKYEDTIQYEFQVNGEPVVLHLERNKGLFSEDYSETHYSPDGREITTTPPVQEHCYYHGYIQNDADSTAVISACNGLKGHFKHQGETYFIEPLKLSNSEAHAVYKYGSLEKEDETHKTCGVTQTTWESDEPIESPQLMVTPEQLRYLNARKYIELYIVVDNVMFRKYTGNLAAIRTRVYEIVNTLNMIYRALNFHVALIGIEIWSIQDQINVQSTVNVTLDLFGAWRETVLLPRRNHDNAQLLTGINFDGQTVGFGYVGGLCLQKQSAAIVQDHSKIASLVATTMAHEMGHNLGINHDTDSCTCQPNTCIMSAILGFEPSYQFSSCSIQEHQRYLIRTLPQCILNR…	snake venom metalloprotease [Philodryas olfersii]	ACS74986.1	94.81
	SB0183_PASZSVMPIII004	Putative percursor of snake venom metalloproteinase P-III Class	ATGATCCAAGTTCTCTTGGTAACTATAAGCTTAGTGGTTTTTCCATGTCAAGGGAGCTCTATAAAACTGGAATCCGGGAAGGTTAATGATTATGAAGTAGTGTATCCACAAAAAGTGCCTGTATTGCCCAAAGGAGGACTTCAGAATGCTGAGCCAGAGACTGAGTATGAAGATACAATGCAATATGAATTTCAAGTGAATGGAGAGCCAGTGGTCCTTCACCTAGAAAGAAATAAAGGACTTTTTTCAGAAGATTACAGTGAAACTCATTATTCCCCTGATGGCAGAGAAATTACAACCACCCCTCCAGTTCAGAATCACTGCTATTATCATGGACACATACAGAATGAAGCTGACTCAACTGCAGTCATCAGTGCATGCAATGGTTTGAAAGGACAT…	MIQVLLVTISLVVFPCQGSSIKLESGKVNDYEVVYPQKVPVLPKGGLQNAEPETEYEDTMQYEFQVNGEPVVLHLERNKGLFSEDYSETHYSPDGREITTTPPVQNHCYYHGHIQNEADSTAVISACNGLKGHFKHQGETYFIEPLKLSNSEAHAVYKYGSLEKEDETHKTCGVTQTTWESDEPIESPQLMVTPEQLRYLNARKYIELYIVVDNVMFRKYTGNLAAIRTRVYEIVNTLNMIYRALNFHVALIGIEIWSIQDQINVQSTVNVTLDLFGAWRETVLLPRRNHDNAQLLTGINFDGQTVGFGYVGGLCLQKQSAAIVQDHSKIASLVATTMAHEMGHNLGINHDTDSCTCQPNTCIMSAILGFEPSYQFSSCSIQEHQRYLIRTLPQCILNR…	snake venom metalloprotease [Philodryas olfersii]	ACS74986.1	92.87
	SB0183_PASZSVMPIII003	Putative percursor of snake venom metalloproteinase P-III Class	ATGATCCAAGTTCTCTTGGTAACTATAAGCTTAGTGGTTTTTCCATGTCAAGGGAGCTCTATAAAACTGGAATCCGGGAATGTTAATGATTATGAAGTAGTGTATCCACAAAAAGTGCCTGTATTGCCCAAAGGAGGACTTCAGAATGCTGAGCCAGAGACTGAGTATGAAGATACAATACAATATGAATTTCAAGTGAATGGAGAGCCAGTGGTCCTTCACCTAGAAAGAAATAAAGGACTTTTTTCAGAAGATTACAGTGAAACTCATTATTCCCCTGATGGCAGAGAAATTACAACCACCCCTCCAGTTCAGAATCACTGCTATTATCATGGACACATACAGAATGAAGCTGACTCAACTGCAGTCATCAGTGCATGCAATGGTTTGAAAGGACAT…	MIQVLLVTISLVVFPCQGSSIKLESGNVNDYEVVYPQKVPVLPKGGLQNAEPETEYEDTIQYEFQVNGEPVVLHLERNKGLFSEDYSETHYSPDGREITTTPPVQNHCYYHGHIQNEADSTAVISACNGLKGHFKHQGETYFIEPLKLSNSEAHAVYKYGSLEKEDETHKTCGVTQTTWELDEPIEKISQVSITPEEQNTYLDAPKYIEFFIAVDNGMFRKYSSDLTAIRTRVYEIVNIINMIYRALNIHVALIGLEIWSNRDQINVQSAANVTLDLFGEWRETDLLPRRRNDNAQLITSIDFDGPTVGLGYVGTLCQPKHSSAIVQDHSDLTSLMASTMAHELGHNLGIHHDTNACQCSSNACVMSPIIGDVPYYQFSSCSIQEHRRYLSTYQPQCIL…	venom metalloprotease precursor [Philodryas chamissonis]	AJB84503.1	91.16
	SB0183_PASZSVMPIII002	Putative percursor of snake venom metalloproteinase P-III Class	ATGATCCAAGTACTCTTGGTAACTATATGCTTAGTGGTTTTTCCATATCAAGGGAGCTCTATGAAACTGAAATCCGGGAATGTTAATGATTATGAAGTAGTGTATCCACAAAAAGTGCCTGTATTGCCCAAAGGAGGACTTCAGAATGCTGAGCCAGAGACCGAGTATGAAGATACAATGCAATATGAATTTCAAGTGAATGGAGAGCCAGTGATCCTTCACCTAAAAAGAAATAAAGGACTTTTTTCAGAAGATTACAGTGAAACTCATTATTCCCCTGATGGCAGAGAAATTACAACCACCCCTCCAGTTTGGAATCACTGCTATTATCATGGACACATAAAGAATGAAGCTGACTCAACTGCAGTTATCAGTGCATGTGACGGCTTGAAAGGACAT…	MIQVLLVTICLVVFPYQGSSMKLKSGNVNDYEVVYPQKVPVLPKGGLQNAEPETEYEDTMQYEFQVNGEPVILHLKRNKGLFSEDYSETHYSPDGREITTTPPVWNHCYYHGHIKNEADSTAVISACDGLKGHFKHQGETYIIEPLKLSNSEAHAVYKYDSLEKEDETHKTCGVTQTTWELDEPIEKISQVSITPEEQNTYLDAPKYIEFFIVVDNGMFRKYSSDLTAIRTRVYEIVNIVNTIYRVLNIHLALIGLEIWSNRDKINVQSAANVTLDLFGTWRETDLLPRRRNDNAHLITSIDFDGPTVGLGYVGSFCEPKHSSAIVQDHSDLTSLMATTMAHEMGHNLGINHDTNACCNSNACVMSPELSDVPYYQFSFCSIQEHRRYLTRAQPQCILN…	snake venom metalloprotease [Philodryas olfersii]	ACS74987.1	90.18
	SB0183_PASZSVMPIII001	Putative percursor of snake venom metalloproteinase P-III Class	ATGATCCAAGTACTCTTGGTAACTATATGCTTAGTGGTTTTTCCATATCAAGGGAGCTCTATGAAACTGAAATCCGGGAATGTTAATGATTATGAAGTAGTGTATCCACAAAAAGTGCCTGTATTGCCCAAAGGAGGACTTCAGAATGCTGAGCCAGAGACCGAGTATGAAGATACAATGCAATATGAATTTCAAGTGAATGGAGAGCCAGTGATCCTTCACCTAAAAAGAAATAAAGGACTTTTTTCAGAAGATTACAGTGAAACTCATTATTCCCCTGATGGCAGAGAAATTACAACCACCCCTCCAGTTTGGAATCACTGCTATTATCATGGACACATAAAGAATGAAGCTGACTCAACTGCAGTTATCAGTGCATGTGACGGCTTGAAAGGACAT…	MIQVLLVTICLVVFPYQGSSMKLKSGNVNDYEVVYPQKVPVLPKGGLQNAEPETEYEDTMQYEFQVNGEPVILHLKRNKGLFSEDYSETHYSPDGREITTTPPVWNHCYYHGHIKNEADSTAVISACDGLKGHFKHQGETYIIEPLKLSNSEAHAVYKYDSLEKEDETHKTCGVTQTTWELDEPIEKISQVSITPEEQNTYLDAKKYIEFFIVVDNGMFRKYSSDLTAIRTRVYEIVNIVNTIYRVLNIHVALIGLEIWSNRDKINVQSAANVTLDLFGTWRETDLLPRRRNDNAQLITSIDFNGPTVGLGYVGSFCQPKHSSAIVQDHSALTGLMASTMAHEMGHNLGINHDTNACQCSSNACVMSPTIGNVPNYQFSSCSIQEHRRYLTRAQPQCIL…	snake venom metalloprotease [Philodryas olfersii]	ACS74987.1	91.49
Snake Venom Serinoproteinase (SVSP)	SB0183_PASZSVSP001	Putative percursor of snake venom serinoproteinase	ATGGCACTGATAGGAGTGCTAGCAAACCTTCTGATACTATGTCTTTCTTACGCAAGAACCGCTCCTGATCGGATCATTGGCGGCTTGGAATGTAACCAAAATGAACATCGTTCCCTTGTACTCTTGTATAACTCTGGAGGGTTTTTCTGCTCTGGGACCTTGATTAACCACGAATGGGTGCTCACCGCTGCACACTGCAACAGAGAAAATATCCAGATAAAGCTTGGTGTGCATAACATACATGTACCCAATGAGGATGAGCAGATAAGAGTCCCAAAGGAGAAGTTGTGTTGTCTCGGTACCAATAACTGTACCCAATTTAACCAGGACATCATGTTGATCAGGCTGAACAGTTCTGTTAACAATAGTCCACACATCGCACCGCTCAGCTTGCCCTCC…	MALIGVLANLLILCLSYARTAPDRIIGGLECNQNEHRSLVLLYNSGGFFCSGTLINHEWVLTAAHCNRENIQIKLGVHNIHVPNEDEQIRVPKEKLCCLGTNNCTQFNQDIMLIRLNSSVNNSPHIAPLSLPSNPPSVGSVCRVMGWGTITSPEVTYPEVPHCVNIQILHKEVCEAAYPILLGNSNVLCAGELLGEKDSCKGDSGGPLICNGQIQGIVSWGRFPCGQILEPGVYTKVFDYIDWIQSIMAGNANLICPGDNF	RecName: Full=Snake venom serine protease; Short=SVSP; Flags: Precursor [Philodryas olfersii]	Q09GK1.1	95.02
Three-Finger Toxin (3FTX)	SB0183_PASZ3FTX002	Putative percursor of snake venom Three-finger toxin	ATGAAAACTCTGCTGCTGTCTTTGGTGGTGGTGGCATTCGTGTACCTGGACTCAGGGTACACCATTACATGTAATTCATGCTCTGGAGCACTTTGTATGACTTTTCAGAATTGTCCAGATGCAACGGCATGTTATAGAAAAGTGTCTGGTCTATTTGGACAGAATGTCGTCAAGGGATGTGCTGCTAATTGCACTTATCCAGCAGCCGGTGAGAAAATTGAATATTGCACAAAAGACAGGTGCAACTAG	MKTLLLSLVVVAFVYLDSGYTITCNSCSGALCMTFQNCPDATACYRKVSGLFGQNVVKGCAANCTYPAAGEKIEYCTKDRCN	three-finger toxin [Helicops leopardinus]	UMW88048.1	74.39
	SB0183_PASZ3FTX001	Putative percursor of snake venom Three-finger toxin	ATGAAAACTCTGCTGCTGTCCTTGGTGGTGGTGGCATTCGTGTACCTGGACTCAGGACACACCATTAAATGTCGCTCATGCAACACAATGATTTGTATTCGCTCTGAGGATTGTCCAGATGCAATGGCATGCTATACAAAGAGGTCTGGTCTATTCAGAGAGAAGGTTGTCAAGGGATGTGCTACTAATTGCACTTATCCAGCAGCCGGTGAGACAATTCAATACTGTGTTGGAGACAACTGCAACTAG	MKTLLLSLVVVAFVYLDSGHTIKCRSCNTMICIRSEDCPDAMACYTKRSGLFREKVVKGCATNCTYPAAGETIQYCVGDNCN	three-finger toxin [Helicops leopardinus]	UMW88050.1	75.61
Waprin Protein (WAP)	SB0183_PASZWAP002	Putative percursor of snake venom Waprin protein	ATGAAGCCTTGGATTCTACTTCTCCTAGCTGGTCTCCTCATTCTTTCAACTCAACAGACATCGGCAAAGCCCAAAAGAGGTCGTTCCGAAATAGTCAAACCGGGTGAGTGTCCCATGTTCAAAATCTCTCCTGACCTTCCATGTGACCAAAACTGTCAGTGGGACTCTAACTGTGAAGGGAATATGAAATGCTGCCCGATGGGATGTGCCAAGGTCTGTTTCCCCCCAGGACCACTCTGA	MKPWILLLLAGLLILSTQQTSAKPKRGRSEIVKPGECPMFKISPDLPCDQNCQWDSNCEGNMKCCPMGCAKVCFPPGPL	RecName: Full=Waprin-Phi3; Flags: Precursor [Philodryas olfersii]	A7X4M7.1	73.75
	SB0183_PASZWAP001	Putative percursor of snake venom Waprin protein	ATGACGCTCAGGAGAGGCAGCTGCCCCTTCTTCCTCTTCTCCCTGGTGGGTCTCCTCACGACCTGTGCTCAGGAGCCCGACGACGCGGCTGGACAGAACACCACAGTGGTCGCAGAGAAAGCTGGCACCTGTCCCCAGCCAGAGTTGGAGATGCCCAATGGGAACTGCACCAAGGAGTGCCAATCCGATGCCGGCTGCGAGGAGAACAAGAAGTGCTGCTGGACAGGATGTGGGACTTCCTGCCAAATCCCAGACGGGAAACCCGGGTCCTGCCCAAATGTGGACGTGCCCATCCCGCCTCTGGGTCTTTGCCAAACCACGTGTAGTAACGATTCACACTGTTCAGGGACGAGGAAATGCTGCAAAAATGGCTGCGGGTATATGACTTGTACAACGGCC…	MTLRRGSCPFFLFSLVGLLTTCAQEPDDAAGQNTTVVAEKAGTCPQPELEMPNGNCTKECQSDAGCEENKKCCWTGCGTSCQIPDGKPGSCPNVDVPIPPLGLCQTTCSNDSHCSGTRKCCKNGCGYMTCTTARP	RecName: Full=Waprin-Phi1; Flags: Precursor [Philodryas olfersii]	A7X4K1.1	86.67

## Sheet: P. PATAGONIENSIS
Table S2. Identification and annotation of transcripts of putative toxins from the venom glands of Philodryadini snakes.
Philodryas patagoniensis
Toxin group	Sequence code	Annotation	Nucleotide sequence	Amino acid sequence	BLAST identification	Accession number	Identity %
5' nucleotidase (NUCL)	SB0235_PPATNUCL002	Putative percursor of snake venom 5' nucleotidase	ATGCAGAGCCCGAGGCGAGGGCGCGGGACTCGGGGTTGCCCTGGAAGCGCCCCTTCGGCGACGCGGCGGCTCCTCGTCGGAGCCGTCTGGGTTTGCGCCGCGCTCTCGGTTGCCGCCGGCTCCTTCGAGCTCACCATTCTGCATACCAACGACGTCCACGCCCGCGTAGAGGAAACCAGCCGGGACGCGGGTAAATGCGCCCGGCAGGATTGCTACGGGGGCGTCGCGCGCCGGGCCGCCAAGATCAAGGAGATCCGCGCCTCGCATCGCCACGTCTTGCTCCTGGACGCCGGGGATCAGTACCAGGGCACCATCTGGTTCAGCTACTACAAAGGGCGCGAAGTGGTGCAATTCATGAATACCCTGCGCTACGACGCGATGGCTCTAGGAAATCATGAA…	MQSPRRGRGTRGCPGSAPSATRRLLVGAVWVCAALSVAAGSFELTILHTNDVHARVEETSRDAGKCARQDCYGGVARRAAKIKEIRASHRHVLLLDAGDQYQGTIWFSYYKGREVVQFMNTLRYDAMALGNHEFDNGLDGLLDPLLKHVKFPILSANIRPKGPIASNISGYILPYKIINVGSEKVGIIGYTTKETPVLSNPGPYLEFRDEVEELQIHANKLTTLGVNKIIALGHSGFKEDRRIAQKVKGVDVVVGGHTNTFLYTGSPPSNEVAAGNYPFMELSDDGRQVPVVQAYAFGKYLGYLNVVFDDKGNVMKASGNPILLNKDIPEDPAVKAEVDKMSIQLKNYSSQEIGKTIVYLNGTTHACRFQECNLGNLICDAVVYNNLRHPDDDEWNHVS…	5' nucleotidase, partial [Spilotes sulphureus]	AXL95273.1	89.97
Acetylcholinesterase (AChE)	SB0235_PPATAChE002	Putative percursor of snake venom Acetylcholinesterase	ATGCCCTCCCGCCAGCCTGGCAAGATGCCTGTGCCGTGGCCTTGGTGGCTCCAGCTCCTCCTCTGCGTCCCACCCTCCATAGCGGTCTTGCCTGGCCCGGCAGAGGAGCTGAAAGTGGCCACCCAGACGGGCTGGGTGCGTGGCAAGCGGGTGCCCGTTCTGGACGGGCACATCTCGGCCTTCCTGGGCATCCCCTTTGCGGAGCCTCCCGTGGGCAGAATGCGCTTCCTGCGCCCTGAGCCCATCAAGCCCTGGCAGCACGTCCTCGACGCCACGGCCTACCAGCACGCCTGCTACCAGATGGTGGACAACACCTACCCGGGCTTCCACGGCACGGAGATGTGGAACCCCAACCGGGAGATGAGCGAAGACTGCCTCTACCTCAACATCTGGGTGCCC…	MPSRQPGKMPVPWPWWLQLLLCVPPSIAVLPGPAEELKVATQTGWVRGKRVPVLDGHISAFLGIPFAEPPVGRMRFLRPEPIKPWQHVLDATAYQHACYQMVDNTYPGFHGTEMWNPNREMSEDCLYLNIWVPSPRPKNISVLVWIYGGGFYSGSASLDVYDGRFLTYTQNVILVSLSYRVGAFGFLGLLGSQEAPGNMGLLDQRLALQWIQNNIQHFGGNPKAVTIFGESAGAASVGMHLLSAQSRALFQRAILQSGAPNAPWATVTPAESRRRATLLGKQVGCHFTNDSELVSCLRSKTPQQLIDEEWSVLPYKSTFRFPFVPVIDGDFFPDTPEAMLGTGNFKETEVLLGVVKDEGSYFLIYGVPGFSKDNSSLISRDDFLEGVRMGVPDANDIAT…	acetylcholinesterase isoform X1 [Crotalus tigris]	XP_039180804.1	93.43
	SB0235_PPATAChE001	Putative percursor of snake venom Acetylcholinesterase	ATGCCCTCCCGCCAGCCTGGCAAGATGCCTGTGCCGTGGCCTTGGTGGCTCCAGCTCCTCCTCTGCGTCCCACCCTCCATAGCGGTCTTGCCTGGCCCGGCAGAGGAGCTGAAAGTGGCCACCCAGACGGGCTGGGTGCGTGGCAAGCGGGTGCCCGTTCTGGACGGGCACATCTCGGCCTTCCTGGGCATCCCCTTTGCGGAGCCTCCCGTGGGCAGAATGCGCTTCCTGCGCCCTGAGCCCATCAAGCCCTGGCAGCACGTCCTCGACGCCACGGCCTACCAGCACGCCTGCTACCAGATGGTGGACAACACCTACCCGGGCTTCCACGGCACGGAGATGTGGAACCCCAACCGGGAGATGAGCGAAGACTGCCTCTACCTCAACATCTGGGTGCCC…	MPSRQPGKMPVPWPWWLQLLLCVPPSIAVLPGPAEELKVATQTGWVRGKRVPVLDGHISAFLGIPFAEPPVGRMRFLRPEPIKPWQHVLDATAYQHACYQMVDNTYPGFHGTEMWNPNREMSEDCLYLNIWVPSPRPKNISVLVWIYGGGFYSGSASLDVYDGRFLTYTQNVILVSLSYRVGAFGFLGLLGSQEAPGNMGLLDQRLALQWIQNNIQHFGGNPKAVTIFGESAGAASVGMHLLSAQSRALFQRAILQSGAPNAPWATVTPAESRRRATLLGKQVGCHFTNDSELVSCLRSKTPQQLIDEEWSVLPYKSTFRFPFVPVIDGDFFPDTPEAMLGTGNFKETEVLLGVVKDEGSYFLIYGVPGFSKDNSSLISRDDFLEGVRMGVPDANDIAT…	acetylcholinesterase isoform X1 [Crotalus tigris]	XP_039180804.1	91.87
C-type Lectin (CTL)	SB0235_PPATCTL014	Putative percursor of snake venom C-type lectin	ATGGGGAGATTCATCTTTGTGAACCTGGGCTTGCTGGTGGTGACTTTCTCCCTAAGGGGATCTGGAGCGGATTGCCCCTCTGGTTGGTCCTCCTATGATAAGTATTGTTACAAGGTCTTTGATGAACGCAAGAATTGGGACGAAGCAGAGCAATGTAGCTGGCAGTGGAGTGATGGCTCCAACCTCGGTTACGAAGCCTGGGTTGAAGAACCCGATTGTGTTATGATGCGTTTACAGCCAGGTTTTATCGACTGGTACAGTGTAGAGTGCAAAAGCACATTACCTTTCACCTGCAAGTTCCTGGCAAAGCGTGAGGATCCAGCTCCAGAGTGA	MGRFIFVNLGLLVVTFSLRGSGADCPSGWSSYDKYCYKVFDERKNWDEAEQCSWQWSDGSNLGYEAWVEEPDCVMMRLQPGFIDWYSVECKSTLPFTCKFLAKREDPAPE	c-type lectin-like protein precursor beta subunit [Philodryas chamissonis]	AJB84507.1	67.31
	SB0235_PPATCTL013	Putative percursor of snake venom C-type lectin	ATGGGGCGATTCATCTTTATGAGCCTCGGCTTGCTGGTTCTGGCTTTTTCCCTGAGTGGAATTGGAGCCGATCAACGTTGTCCCTCCAGTTGGTCCTCCCACAATGTGTCTTGCTACAAGTTCTTCGACGACTGGATGACCTGGGACGAAGCGCAGAGGTTCTGCATGGACGAGCAGGAAAACGGCCAACTCGCCTCCATCAAAGATCTAGAAGAGGCAGTGAAGTTGTCCTACCTGATCTCCAAAGCAAGGAGTATTTTTGATGTCTGGATTGGACTGAGGCTTTCAAAGAGAAAAAGCATCTGGGAGTGGAGTGATGGCTCCAGCGTGACCCAGACACGCTGGGAAGAAGGAGAACCCAACAACGTTTTGAAGAAGGAGTTCTGTGCTATACTGACA…	MGRFIFMSLGLLVLAFSLSGIGADQRCPSSWSSHNVSCYKFFDDWMTWDEAQRFCMDEQENGQLASIKDLEEAVKLSYLISKARSIFDVWIGLRLSKRKSIWEWSDGSSVTQTRWEEGEPNNVLKKEFCAILTSRSHYLKWNNTNCRDWHPFVCKFQPPREARGC	RecName: Full=C-type lectin lectoxin-Phi1; Short=CTL; Flags: Precursor [Philodryas olfersii]	A7X406.1	80.13
	SB0235_PPATCTL011	Putative percursor of snake venom C-type lectin	ATGGAGCGATTCATCTTTGGAGTCTTGCTGGCTGTGGCCCTCTCCCCAAGTGGAACCGGAGCTGATCCCCAATGTCCCGCCGGTTGGTCCTCCTATAATGGGCATTGCTACAAAGTCTTCAAACAATTCAAAAGCTGGGCCGATGCAGAGATGTTCTGCAGTCGAGAGGAGGAAGGGGGCCATCTCGCCTCCATCCAAAGCAAGCCAGAGGCAGCTTTCGTGGCCAAGCTGGTCTCCCGCCATGTCCTCCTTTTCAGTGTCTGGATCGGGCTGAGTGCGCAATGGAAACAACGCATCTGGAGGTGGAGTGATGGCTCCAGCTTCCGCTACAAATCCTGGGCACTAGGAGAACCCAACAACTTTCTTTGGAACGAGTACTGCGTTGTGCTGGCGAGCCTG…	MERFIFGVLLAVALSPSGTGADPQCPAGWSSYNGHCYKVFKQFKSWADAEMFCSREEEGGHLASIQSKPEAAFVAKLVSRHVLLFSVWIGLSAQWKQRIWRWSDGSSFRYKSWALGEPNNFLWNEYCVVLASLSGYRRWNDQSCGSKHYFLCKFQPQGEGSTW	RecName: Full=C-type lectin lectoxin-Lio1; Short=CTL; Flags: Precursor [Erythrolamprus poecilogyrus]	A7X3Z4.1	70.55
	SB0235_PPATCTL010	Putative percursor of snake venom C-type lectin	ATGGGGCGATTCATCTTTGTGAGTCTCGGCTTGCTGGTTCTGGCTTTTTCCCTGAGTGGAATTGGAGCTGATCAACATTGTCCCTCCGGTTGGTTCTCCCACAATGTGTCTTGCTACAAGCTCATCAACGATTGGAAGACCTGGGACGAAGCGCAGAGGTTCTGCATGGACGAGCAGGAAAATGGCCAACTCGCCTCCATCAACGATGTGGGAGAGGCAGTGAAGTTGTCCGACGAGATCTCCAAAACATGGAGTATTATTGATGTCTGGATTGGATTGAGGCTTTCAAAGAGAAAAGGCATCTGGGAGTGGAGTAATGGCTCCAATGTGACCCAGACACGCTGGGAAGAAGGAGAACCCAACAACTTTTTGAAGAATGAGTTCTGTGTTGTACTGACA…	MGRFIFVSLGLLVLAFSLSGIGADQHCPSGWFSHNVSCYKLINDWKTWDEAQRFCMDEQENGQLASINDVGEAVKLSDEISKTWSIIDVWIGLRLSKRKGIWEWSNGSNVTQTRWEEGEPNNFLKNEFCVVLTVRSHYLKWNDKDCNRRHRFLCKF	RecName: Full=C-type lectin lectoxin-Phi1; Short=CTL; Flags: Precursor [Philodryas olfersii]	A7X406.1	95.51
	SB0235_PPATCTL009	Putative percursor of snake venom C-type lectin	ATGGGGCGATTCATCTTTGTGAGTCTCGGCTTGCTGGTTCTGGCTTTTTCCCTGAGTGGAATTGGAGCCGATCAACATTGTCCCTCCGGTTGGTTCTCCCACAATGTGTCTTGCTACAAGCTCATCAACGATTGGAAGACCTGGGACGAAGCGCAGAGGTTCTGCATGGATGAACAGGAAAACGGCCAACTCGCCTCCATCAACGATGTGGGAGAGGCAGTGAAGTTGTCCGACGAGATCTCCAAAACATGGAGTATTATTGATGTCTGGATTGGATTGAGGCTTTCAAAGAGAAAAGGTATCTGGGAGTGGAGTAATGGCTCCAATGTGACCCAGACACGCTGGGAAGAAGGAGAACCCAACAACTTTTTGAAGAATGAGTTCTGTGTTGTACTGACA…	MGRFIFVSLGLLVLAFSLSGIGADQHCPSGWFSHNVSCYKLINDWKTWDEAQRFCMDEQENGQLASINDVGEAVKLSDEISKTWSIIDVWIGLRLSKRKGIWEWSNGSNVTQTRWEEGEPNNFLKNEFCVVLTVRSHYLKWNDKDCNRRHRFLCKF	RecName: Full=C-type lectin lectoxin-Phi1; Short=CTL; Flags: Precursor [Philodryas olfersii]	A7X406.1	95.51
	SB0235_PPATCTL007	Putative percursor of snake venom C-type lectin	ATGGGGCGATTCATCCTTCTGACCCTCGGCTTGCTGGTCGTGGCTTTCTCCCTTAATGGAATTGGAGCTGATCACCCTTGCCCTACGGGCTGGTCCTCCTTTGAACACTTTTGCTACAAGTTCTTCAAACTACGGAAGACCTGGGAAGAGGCAGAGACGTTCTGCGTCCAAGAGCAGAATGGCAGCCATCTCGTCTCCATCCAAAGCTGGACAGAGTCAGCCTACGTGGCCAGGCTGGTCTCCAGAAATACGCTCTTCTCCATTGTCTGGATCGGACTGAAGGATTCAGAGAAAAATGGCACCTGGGAATGGAGTGATGGCTCCAACTTCAGTTACACATCCTGGCAAATAAGGCAACCTAACAATGGTGATGATAAGGACTACTGCGTTGTGCTATCC…	MGRFILLTLGLLVVAFSLNGIGADHPCPTGWSSFEHFCYKFFKLRKTWEEAETFCVQEQNGSHLVSIQSWTESAYVARLVSRNTLFSIVWIGLKDSEKNGTWEWSDGSNFSYTSWQIRQPNNGDDKDYCVVLSRWSGFLGWKVVNCESRSFFVCKFQPKSDGST	RecName: Full=C-type lectin lectoxin-Lei1; Short=CTL; Flags: Precursor [Leioheterodon madagascariensis]	A7X401.1	61.94
	SB0235_PPATCTL006	Putative percursor of snake venom C-type lectin	ATGGGGAGATTCATCTTTGTGAACCTGGGCTTGCTGGTCGTGGCTTTCTCCCTAAGGGGATCTGGAGCGGATTGCCCCTCTGGTTGGTCCTCCTATGATAAGTATTGTTACAAGGTCTTTGATGAACGCAAGAATTGGGACGAAGCAGAGAGGTTCTGCATGGAGCAGAAGATGGGCAGCCATCTGGCCTCCATTCTTAGCAGTGAAGAAGGATCTTATGTGGCCAATCTGGCCTTCAAACGTGTGAAGCACCCTTCTATGTGGATCGGACTGAGTAATATATGGAATCAATGTAGCTGGCAGTGGAGTGATGGCTCCAACCTCGGTTACGAAGCCTGGGTTGAAGAACCCGATTGTGTTATGATGCGTTTACAGCCAGGTTTTATCGACTGGTACAGT…	MGRFIFVNLGLLVVAFSLRGSGADCPSGWSSYDKYCYKVFDERKNWDEAERFCMEQKMGSHLASILSSEEGSYVANLAFKRVKHPSMWIGLSNIWNQCSWQWSDGSNLGYEAWVEEPDCVMMRLQPGFIDWYSVECKSTLPFTCKFLAKREDPAPE	c-type lectin-like protein precursor beta subunit [Philodryas chamissonis]	AJB84507.1	96.15
	SB0235_PPATCTL004	Putative percursor of snake venom C-type lectin	ATGGGGAGATTCATCTTTGTGAACCTGGGCTTGCTGGTGGTGACTTTCTCCCTAAGGGGATCTGGAGCGGATTGCCCCTCTGGTTGGTCCTCCTATGATAAGTATTGTTACAAGGTCTTTGATGAACGCAAGAATTGGGACGAAGCAGAGAGGTTCTGCATGGAGCAGAAGGCGGGCAGCCATCTGGCCTCCATCCTTAGCAGTGAAGAAGGATCTTATGTGGCCAATCTGGCCTTCAAACGCGTGAAGCACCCTTCTATGTGGATCGGACTGAGTAATATATGGAATCAATGTAGCTGGCAGTGGAGTGATGGCTCCAACCTCGGTTACGAAGCCTGGGTTGAAGAACCCGATTGTGTTATGATGCGTTTACAGCCAGGTTTTATCGACTGGTACAGT…	MGRFIFVNLGLLVVTFSLRGSGADCPSGWSSYDKYCYKVFDERKNWDEAERFCMEQKAGSHLASILSSEEGSYVANLAFKRVKHPSMWIGLSNIWNQCSWQWSDGSNLGYEAWVEEPDCVMMRLQPGFIDWYSVECKSTLPFTCKFLAKREDPAPE	c-type lectin-like protein precursor beta subunit [Philodryas chamissonis]	AJB84507.1	95.51
	SB0235_PPATCTL001	Putative percursor of snake venom C-type lectin	ATGGGGCGATTCATCTTTGTGAACCTGGGCTTGCTGGTCGTGGCTTTCTCCCTAAGGGGATCTGAAGCTTGTTGTCCCTGCGGTTGGTCCTCCTATGATAAGTATTGCTACAAGGCCTTCGATAAACGCAAGAATTGGGACGATGCCGAGAGGTTCTGCAATGAGCAGGGGAAAAGCGGTCATCTGGCCTCTGTCGGAAGCCTTGAAGAGGGAAAATTTGTGGGCAAACTCGTGTTTAAAAAATTAAAGGAACACCCAACCCATGTCTGGATCGGACTGAGGGCTCAAGGCCAAGGACAGCAATGCAGCTCGAGGTGGAGTGATGGCTCCAGGATCCTTTATGAAAACTGGCATCCATTACAATCCAGAAAATGCATTGCGTTGTCAAAATGGACGGAC…	MGRFIFVNLGLLVVAFSLRGSEACCPCGWSSYDKYCYKAFDKRKNWDDAERFCNEQGKSGHLASVGSLEEGKFVGKLVFKKLKEHPTHVWIGLRAQGQGQQCSSRWSDGSRILYENWHPLQSRKCIALSKWTDYLKWYNHNCDFTLPFICKFLAEPDDPE	RecName: Full=Snaclec subunit A; AltName: Full=C-type lectin subunit A; Flags: Precursor [Philodryas olfersii]	Q09GJ8.1	93.12
C-type Natriuretic Peptide (CNP)	SB0235_PPATCNP002	Putative percursor of snake venom C-type Natriuretic Peptide	ATGTTCGCCTCCCGTCTGGCGGCCGGCGGGCTGCTCTTGCTGGCCCTGCTGGCTCTGGCCCTCGACGGCAAGCCGGCGCCCTCGCAGCCGCTGCGCAAGGCTCCGGCGGGCGGCACGACGGCGTGGCGGCGGGAGCTGACGGAGCAGCCGGAGGGGGCGTCGCGTCCCGCGGCTGGAGGCGGCGGCCGCAGCGGTTCCAAGGCGGCCAATGCAGCCCCGACGGCACCGAAGAGCAAAGGGGCGGCGGCGGCGGCGGCGGCGGCGCGGCTGATGCGGGATTTGCGCCCCGACAGCAAGCAGGCGCGGGCCGCCTGGGGCCGGATGGTGCACCCTGAGCACCACGCAGGAGGCGGCGGCGGTGGAGGCGGTGGCGGCGGAGGAGCCTCGCGTCGTCTGAAG…	MFASRLAAGGLLLLALLALALDGKPAPSQPLRKAPAGGTTAWRRELTEQPEGASRPAAGGGGRSGSKAANAAPTAPKSKGAAAAAAAARLMRDLRPDSKQARAAWGRMVHPEHHAGGGGGGGGGGGGASRRLKGVAKKGLGKGCFGLKLDRIGSMSGLGC	natriuretic peptide precursor [Philodryas chamissonis]	AJB84508.1	95.15
	SB0235_PPATCNP001	Putative percursor of snake venom C-type Natriuretic Peptide	ATGTTCGCCTCCCGTCTGGCGGCCGGCGGGCTGCTCTTGCTGGCCCTGCTGGCTCTGGCCCTCGACGGCAAGCCGGCGCCCTCGCAGCCGCTGCGCAAGGCTCCGGCGGGCGGCACGACGGCGTGGCGGCGGGAGCTGACGGAGCAGCCGGAGGGGGCGTCGCGTCCCGCGGCTGGAGGCGGCGGCCGCAGCGGTTCCAAGGCGGCCAATGCAGCCCCGACGGCACCGAAGAGCAAAGGGGCGGCGGCGGCGGCGGCGGCGCGGCTGATGCGGGATTTGCGCCCCGACAGCAAGCAGGCGCGGGCCGCCTGGGGCCGGATGGTGCACCCCGAGCACCACGCAGGAGGCGGCGGCGGTGGAGGCGGCGGCGGAGGAGCCTCGCGTCGTCTGAAGGGGGTG…	MFASRLAAGGLLLLALLALALDGKPAPSQPLRKAPAGGTTAWRRELTEQPEGASRPAAGGGGRSGSKAANAAPTAPKSKGAAAAAAARLMRDLRPDSKQARAAWGRMVHPEHHAGGGGGGGGGGGASRRLKGVAKKGLGKGCFGLKLDRIGSMSGLGC	RecName: Full=C-type natriuretic peptide; Short=CNP; Flags: Precursor [Philodryas olfersii]	Q09GK2.1	95.12
Cystatin-C (CYS)	SB0235_PPATCYS001	Putative percursor of snake venom Cystatin-C	ATGGCCTTGTCGCGGGGGCTTTTGGTGTGCGGCTTACTCTTGCTCAGTTGTGTCTGCAAGCAGGCGCTCGGGACCAGGCTCCTCGGGGGACTGGAGGATGCTTCCCCGGACGAACCGGGCGTCCGTACGGCCCTTCAATTTGCCATGAACGAATACAACAGAGGAAGCAACGATATGTATCATAGTCGCGTATCCGAAGTGGTCCGAGCCCAAAAACAGATTGTCAGCGGAATTAAGTATTACTTCACTGTTACGATTGGACGTACTGTTTGCCGTAAGGGAGCATCTGACCTTGAAAATTGTGCATTTCATAGCACACCTAAACTGGCACAGACAATGACTTGCACTTTTGAGGTTTACAATGTTCCTTGGAGAAACATCATTTCCCTGGAAAAAAGT…	MALSRGLLVCGLLLLSCVCKQALGTRLLGGLEDASPDEPGVRTALQFAMNEYNRGSNDMYHSRVSEVVRAQKQIVSGIKYYFTVTIGRTVCRKGASDLENCAFHSTPKLAQTMTCTFEVYNVPWRNIISLEKSSCT	Cystatin-C, partial [Ophiophagus hannah]	ETE66625.1	83.82
Cysteine-rich secretory protein (CRISP)	SB0235_PPATCRISP001	Putative percursor of snake venom Cysteine-rich secretory protein	ATGATTGTCTTCATCTTGCTAAGTCTTGCTGCAGTGCTGCAACAGTCTTTTGGACTTGTTGATTTTGATTCTGAGTCACCCAGGAGACCAGAAATACAAAGGGTGATTGTTGACACGCACAATTCTTACAGAAGAACTGTCAGTCCAACTGCTAGCAACATGCTAAGAATGGAATGGTATGCTGAAGCTGCTGCAAATGCAGAACGTTGGGCGTCTCTATGTGCTTATGATCACAGCCAAAATTCTGACAGAGTTCTTGATGGAATACAATGTGGTGAAAATATATACATGTCAAGTAATCCCAGGTCATGGACTGAAATAATGCAGTTGTGGTATGATGAATACAAAAATTTCATCTTTGGCGTTGGAGCAAATCCACCAGGTTCTGTTATAGGCCAT…	MIVFILLSLAAVLQQSFGLVDFDSESPRRPEIQRVIVDTHNSYRRTVSPTASNMLRMEWYAEAAANAERWASLCAYDHSQNSDRVLDGIQCGENIYMSSNPRSWTEIMQLWYDEYKNFIFGVGANPPGSVIGHYTQIVWYKSYRVGCAAYYCPSSLYNYFYVCQYCPAGNFAGRTATPYNSGPTCGDCPSACDNGLCTNPCSKKNEFTNCNDLVQQSSCQDDWIKLNCAATCFCKNKII	RecName: Full=Cysteine-rich venom protein; Short=CRVP; AltName: Full=CRISP-PHI1; AltName: Full=CRISP-PHI2; AltName: Full=Cysteine-rich secretory protein; Flags: Precursor [Philodryas olfersii]	Q09GJ9.1	96.65
Kunitz-type protein (KUNZ)	SB0235_PPATKUNZ003	Putative percursor of snake venom Kunitz-type protein	ATGTGGGCCAGGGTCCTTCTCCTGGGGGTGCTCCTCTCCCTCCTTGCTGACCTCCATGCTGCCAGTGGTGGAGATGCTGGGGGTCAAAAGACCTGGAATCCTCGGAACAAGGTTTGCAAACTCCCAGCAGATTCAGGTCCTTGTGAAGGATATTCAAAACAGTATTATTACAACTGGAAGACCAAAAAGTGTGAAACATTTGTTTATGGATTATGTGGTGGCAACGACAATCGCTTCTCCACAAAACTGGAGTGCCAAATGGTCTGTGAAGGATTCGACCAACAGCAACAGCCCAAAGAATGA	MWARVLLLGVLLSLLADLHAASGGDAGGQKTWNPRNKVCKLPADSGPCEGYSKQYYYNWKTKKCETFVYGLCGGNDNRFSTKLECQMVCEGFDQQQQPKE	hypothetical protein L345_15738, partial [Ophiophagus hannah]	ETE58538.1	57.30
	SB0235_PPATKUNZ002	Putative percursor of snake venom Kunitz-type protein	ATGTGGGCCAGGGTCCTTCTCCTGGGGGTGCTCCTCTCCCTCCTTGCTGACCTCCATGCTGCCAGTGGTGGAGATGCTGGGGGTCAAAAGACCTGGAATCCTCGGAACAAGGTTTGCAAACTCCCAGCAGATTCAGGTCCTTGTGAAGGATATTCAAAACAGTATTATTACAACTGGAAGACCAAAAAGTGTGAAACATTTGTTTATGGATTATGTGGTGGCAACGACAATCGCTTCTCCACAAAACTGGAGTGCCAAATGGTCTGTGGTGGATTCGGGCAAATGCAACCCTCTACGGCCTGA	MWARVLLLGVLLSLLADLHAASGGDAGGQKTWNPRNKVCKLPADSGPCEGYSKQYYYNWKTKKCETFVYGLCGGNDNRFSTKLECQMVCGGFGQMQPSTA	hypothetical protein L345_15738, partial [Ophiophagus hannah]	ETE58538.1	55.21
Ku-wap-fusin protein (KUWAP)	SB0235_PPATKUWAP001	Putative percursor of snake venom Ku-wap-fusin protein	ATGCAGCCCGAGTGTGGGGCAGACGGCTTCACCATGTCTTCTGGAGGTCTTCTTCTCCTGCTGGGACTCCTCACCCTCTGGGCAGAGCTGACCCCTGTCTCCGGCCAGGACCGGCCAGAGCTCTGTTACCTTCCGGCGGACACTGGACCATGTAAAGCCAAATTTCCTCGCTTCTACTACAACTCGGCTTCAAATAAATGTCAAGAGTTTATTTATGGTGGATGCCAGGGCAATGCCAACAATTTTGAGACCAAAGATGAATGCCACTTCACCTGTGTTGAAAAGCCTGGTGTGTGTCGCAAGGCCCCTCCAGGCACAAGCACTATTTGTATTGTGAACTGTGAAAATGACTGGAAATGCCCCGGGAGGCAGAAGTGCTGCAGTTATGCTTGCATGATT…	MQPECGADGFTMSSGGLLLLLGLLTLWAELTPVSGQDRPELCYLPADTGPCKAKFPRFYYNSASNKCQEFIYGGCQGNANNFETKDECHFTCVEKPGVCRKAPPGTSTICIVNCENDWKCPGRQKCCSYACMIDCMDPI	kunitz/BPTI-like toxin [Pantherophis guttatus]	XP_034280079.1	89.06
Phospholipase A2 inhibitor (iPLA)	SB0235_PPATiPLA001	Putative percursor of snake venom Phospholipase A2 inhibitor	ATGAAGCATCTTCTTATTTTCACTGCTTTGATAATTACAGCAACTGATGCTCAACTGACCTGCGCATGTTCTGACCCAACGACTGGACCAGCGTGCGTCGCGGCAAATACTTGTACTATCCCAAAGGGACAATGTTATTCAATTCAGAGGCAAATTGCTACCGAGAAAGATAAGTCAGCCAATGGAACAAGTAAAGGCTGCCAAGAAGACAAAGATCCTAAGATCTGCAATGAAGGGGTTGTGTTCATTTCGACTGAGAATGATTTTTATCTGCTGAGCAATGTTACATGCTGTGACAAAAATGAATGCAACAAAGAAGTTGTTGTAGAACTTCCAGAAGTTTCAACCCTTACGACTCTTTCCAGCAAAAAGCTGGTTTGCCCATCATGCTTTACTTCG…	MKHLLIFTALIITATDAQLTCACSDPTTGPACVAANTCTIPKGQCYSIQRQIATEKDKSANGTSKGCQEDKDPKICNEGVVFISTENDFYLLSNVTCCDKNECNKEVVVELPEVSTLTTLSSKKLVCPSCFTSDKKECDAKQMNCSEGQDKCFTIIGTITKGGKTSDFIAKGCAAQSAILKNGTTLTFGDATYKLNTVEVVEAKGGVSQISSCLSFAILLPSILWFLLDSSLY	phospholipase A2 inhibitor and Ly6/PLAUR domain-containing protein-like [Pseudonaja textilis]	XP_026571254.1	62.03
Phospholipase B (PLB)	SB0235_PPATPLB002	Putative percursor of snake venom Phospholipase B	ATGGTCCGCTACGGCATCGCCGCCTCCTCGGACAATCGCCGCCTGCGATGCTGGAGCTGGTACTGGGGGGGACTTTTACTTCTCTGGGCCGTGGCAGAAACTCGAGCAGATCTCCACTATGCTACTGTATATTGGTTGGAAGCTGAAAAATCTTTCCAAGTTAGGGATGTATTAGACAAGAATGGTGATGCTTATGGCTATTACAATGACACTGTACAATCTACTGGATGGGGGATACTTGAGATCAAAGCAGGCTACGGTAATCAGCCCGTAAGCAATGAAATACTCATGTATGCTGCAGGTTTCTTGGAAGGCTACCTCACTGCTTCACGTATGAGTGACCATGTTGCAAATCTATATCATCAGCTGATTAAGAATGTCATCATTGAACAAAAAGTA…	MVRYGIAASSDNRRLRCWSWYWGGLLLLWAVAETRADLHYATVYWLEAEKSFQVRDVLDKNGDAYGYYNDTVQSTGWGILEIKAGYGNQPVSNEILMYAAGFLEGYLTASRMSDHVANLYHQLIKNVIIEQKVKDFMKKQDEWTRQQIKNNKDDPFWRNAGYIIAQLDGLYMGNVEWAKRQKRTPLTDFEISFLNAIGDLLDLIPALISDSRNNDFFSLREISRMYQWDMGHCSALIKVLPGYENIYFAHSSWFTYAATLRIYKHWDFRIIDPQTKTGRASFSSYPGFLVSLDDFYILGSGLIMLQTTNSVFNLSLLKQVVPESLFAWERVRIANMMADSGKSWAQTFEKENSGTYNNQYMILDTKKVKLQRSIDDGTLYIIEQVPNLVKYSDQTDILR…	phospholipase B-like 1 [Pantherophis guttatus]	XP_034259424.1	94.03
	SB0235_PPATPLB001	Putative percursor of snake venom Phospholipase B	ATGGTCCGCTACGGCATCGCCGCCTCCTCGGACAATCGCCGCCTGCGATGCTGGAGCTGGTACTGGGGGGGACTTTTACTTCTCTGGGCCGTGGCAGAAACTCGAGCAGATCTCCACTATGCTACTGTATATTGGTTGGAAGCTGAAAAATCTTTCCAAGTTAGGGATGTATTAGACAAGAATGGTGATGCTTATGGCTATTACAATGACACTGTACAATCTACTGGATGGGGGATACTTGAGATCAAAGCAGGCTACGGTAATCAGCCCGTAAGCAATGAAATACTCATGTATGCTGCAGGTTTCTTGGAAGGCTACCTCACTGCTTCACGTATGAGTGACCATGTTGCAAATCTATATCATCAGCTGATTAAGAATGTCATCATTGAACAAAAAGTA…	MVRYGIAASSDNRRLRCWSWYWGGLLLLWAVAETRADLHYATVYWLEAEKSFQVRDVLDKNGDAYGYYNDTVQSTGWGILEIKAGYGNQPVSNEILMYAAGFLEGYLTASRMSDHVANLYHQLIKNVIIEQKVKDFMKKQDEWTRQQIKNNKDDPFWRNAGYIIAQLDGLYMGNVEWAKRQKRTPLTDFEISFLNAIGDLLDLIPALISDSRNNDFFSLREISRMYQWDMGHCSALIKVLPGYENIYFAHSSWFTYAATLRIYKHWDFRIIDPQTKTGRASFSSYPGFLVSLDDFYILGSGLIMLQTTNSVFNLSLLKQVVPESLFAWERVRIANMMADSGKSWAQTFEKKYSDQTDILRKGYWPSYNIPFHKVIYNMSGYREYVQKYGLDFSYEMAPR…	phospholipase B-like 1 [Pantherophis guttatus]	XP_034259424.1	87.52
Snake Venom Acid Lipase (SVLIPA)	SB0235_PPATSVLIPA003	Putative percursor of snake venom Acid Lipase	ATGTGGCTGCTAATAATTGCAGTGAGCTTGTTCCAAGGCCTGGTAAATTCATCAGTGCTTGAGAGAAGAAAAAGAGGCGTGGATCCAGAAACCTCCATGAACATTAGTGAAATTATTTTATTCAGAGGATATCCCAGTGAGGAATATGAGGTGGTGACAGATGATGGATATATCCTAAGTATTAATAGAATTCCTTATGGAAAAATAAGTCAGAAAACCAAGGAACGGAGACCAGCTGTGTTTCTGCAACATGGCTTTCTTGCTGATGGCAGTAACTGGGTGACCAACCTAGACTACAACAGCCTGGGTTTTGTGCTGGCTGACGCTGGTTTTGATGTTTGGTTAGGGAACAGCAGAGGAAACACTTGGTCCCGAAAACACACCACCTATACCACAAAG…	MWLLIIAVSLFQGLVNSSVLERRKRGVDPETSMNISEIILFRGYPSEEYEVVTDDGYILSINRIPYGKISQKTKERRPAVFLQHGFLADGSNWVTNLDYNSLGFVLADAGFDVWLGNSRGNTWSRKHTTYTTKQKEFWMFSFDEMAKYDLPASINFVLNKTGQEQLFYVGHSQGTAIGFIAFSAFPELAKKINMFFGLAPAMTAMFSSGPLAKLGELPELLLKEIFGTKEFFPQNALIKWLATKVCSRVLLDDLCGNVFFLVCGFNEKNLNMSRVDVYTTHCPAGTSVQNMIHLSQLIKSGEMRAFDWGSRKENMAHYNQPTPPPYKLKGMLVPTAIWTGGHDFLADKKDVAMLITMIPNLIYHKEIPDWEHLDFIWGLDAPERMFRDMIEMMRKAQYAH	putative lysosomal acid lipase/cholesteryl ester hydrolase [Pseudonaja textilis]	XP_026566277.1	88.25
	SB0235_PPATSVLIPA002	Putative percursor of snake venom Acid Lipase	ATGTGGCTGCTAATAATTGCAGTGAGCTTGTTCCAAGGCCTGGTAAATTCATCAGTGCTTGAGAGAAGAAAAAGAGGTGTGAATCCAGAAACATCCATGAACATTAGTGAAATTATTTTATTCAGAGGATATCCCAGTGAGGAATATGAGGTGGTGACAGATGATGGATATTTTCTAAGTATTAATAGAATTCCTTATGGAAAAATAAGTCAGAAAACCAAGGAACGGAGACCAGCTGTGTTTCTGCAACATGGCTTACTTGCTGATGGCAGTACCTGGGTGACCAACCTAGACTACAACAGCCTGGGTTTTGTGCTGGCTGACGCTGGTTTTGATGTTTGGTTAGGGAACAGCAGAGGAAACACTTGGTCCCGAAAACACATCAACTATACCACAAAG…	MWLLIIAVSLFQGLVNSSVLERRKRGVNPETSMNISEIILFRGYPSEEYEVVTDDGYFLSINRIPYGKISQKTKERRPAVFLQHGLLADGSTWVTNLDYNSLGFVLADAGFDVWLGNSRGNTWSRKHINYTTKQKEFWMFSFDEMAKYDLPASINFVLNKTGQEQLFYVGHSQGTTIGFIAFSAFPELAKKINMFFGLAPVMTAMFSSGALAKLGELPELLLKEIFGTKEFFPQNALIKWLATQVCDHVLLDDLCGNIFFLLCGFNEKNLNMSRVDVYTTHCPAGTSVQNMLHWQQVVKSGEMRAFDWRSRKENMAHYNQPTPPPYKLKGMLVPTAIWTGGHDLLADKKDVAMLITMIPNLIYHKEIPDWEHLDFIWGLDAPERMFRDMIEMMRKAQYAH	putative lysosomal acid lipase/cholesteryl ester hydrolase [Pseudonaja textilis]	XP_026566277.1	89.75
	SB0235_PPATSVLIPA001	Putative percursor of snake venom Acid Lipase	ATGTGGCTGCTAATAATTGCAGTGAGCTTGTTCCAAGGCCTGGTAAATTCATCAGTGCTTGAGAGAAGAAAAAGAGGCGTGGATCCAGAAACCTCCATGAACATTAGTGAAATTATTTTATTCAGAGGATATCCCAGTGAGGAATATGAGGTGGTGACAGATGATGGATATATCCTAAGTATTAATAGAATTCCTTATGGAAAAATAAGTCAGAAAACCAAGGAACGGAGACCAGCTGTGTTTCTGCAACATGGCTTTCTTGCTGATGGCAGTAACTGGGTGACCAACCTAGACTACAACAGCCTGGGTTTTGTGCTGGCTGACGCTGGTTTTGATGTTTGGTTAGGGAACAGCAGAGGAAACACTTGGTCCCGAAAACACACCACCTATACCACAAAG…	MWLLIIAVSLFQGLVNSSVLERRKRGVDPETSMNISEIILFRGYPSEEYEVVTDDGYILSINRIPYGKISQKTKERRPAVFLQHGFLADGSNWVTNLDYNSLGFVLADAGFDVWLGNSRGNTWSRKHTTYTTKQKEFWMFSFDEMAKYDLPASINFVLNKTGQEQLFYVGHSQGTTIGFIAFSAFPELAKKINMFFGLAPVMTAMFSSGALAKLGELPELLLKEIFGTKEFFPQNALIKWLATQVCDHVLLDDLCGNIFFLLCGFNEKNLNMSRVDVYTTHCPAGTSVQNMLHWQQVVKSGEMRAFDWRSRKENMAHYNQPTPPPYKLKGMLVPTAIWTGGHDFLADKKDVAMLITMIPNLIYHKEIPDWEHLDFIWGLDAPERMFRDMIEMMRKAQYAH	putative lysosomal acid lipase/cholesteryl ester hydrolase [Pseudonaja textilis]	XP_026566277.1	89.50
Snake venom Endogenous Matrix-Metalloproteinase 9 (seMMP-9)	SB0235_PPATSeMMP002	Putative percursor of snake venom endogenous matrix-metalloproteinase-9	ATGAGACTCCCGGTGCCGGCCTCCCTCCTCCTCCTCCTGGCGCTCCTGCCGCTGCCCTGTCCGTGGGCCGCCCCGACGGAGGAAGGGAAGGGCCCCGTTGTCATCACCTTCCCCGGGGACGCCGTCAGCCACCTGACGGACCGGGAGCTGGCCGCCCGCTACCTCCAGCGTTACGGGTACCTGACGACGACCCACCCCGGGGGGCAGGTGAAGCTGGAGACCCCCCTCAAGGCCATGCAGAAACAGCTGGGCTTGCCGGAAACAGGGGAGCTGGACGCCCCCACCCTCACGGCCATACGAGCGCCCCGCTGCGGAGTCCCGGACGTGGGTCGCTTCCAGACCTTCGAGGGCGACCTCAGGTGGGACCACACGGACATCACTTATCGGGTGGTCAACTAT…	MRLPVPASLLLLLALLPLPCPWAAPTEEGKGPVVITFPGDAVSHLTDRELAARYLQRYGYLTTTHPGGQVKLETPLKAMQKQLGLPETGELDAPTLTAIRAPRCGVPDVGRFQTFEGDLRWDHTDITYRVVNYSPDLDGSIIEDAFVRAFKVWSDVTPLTFTRRQDGEVDILIQFGTKEHGDGYPFDGKDGLLAHAFPPGKDRFSGDAHFDDDEFWTLGTGVVVKTHFGNANGALCHFPFIFEGKSYSSCTTEGREDGLPWCATTPDYDQDKKYGFCPSELLFTYDGNGDGEKCVFPFVFEGKSYQGCTTDGRTDGYRWCATTANFDQDKKYGFCPNRDTAVIGGNSQGEPCSFPFKFLGQTYSSCTADGRTDRRLWCATTSDFDADKKWGFCPDQGYS…	matrix metalloproteinase-9 [Pantherophis guttatus]	XP_034280049.1	87.76
	SB0235_PPATSeMMP001	Putative percursor of snake venom endogenous matrix-metalloproteinase-9	ATGAGACTCCCGGTGCCGGCCTCCCTCCTCCTCCTCCTGGCGCTCCTGCCGCTGCCCTGTCCGTGGGCCGCCCCGACGGAGGAAGGGAAGGGCCCCGTTGTCATCACCTTCCCCGGGGACGCCGTCAGCCACCTGACGGACCGGGAGCTGGCCGCCCGCTACCTCCAGCGTTACGGGTACCTGACGACGACCCACCCCGGGGGGCAGGTGAAGCTGGAGACCCCCCTCAAGGCCATGCAGAAACAGCTGGGCTTGCCGGAAACAGGGGAGCTGGACGCCCCCACCCTGACGGCCATACGAGCGCCCCGCTGCGGAGTCCCGGACGTGGGTCGCTTCCAGACCTTCGAGGGCGACCTCAAGTGGGACCACACGGACATCACTTACCGGGTGGTCAACTAT…	MRLPVPASLLLLLALLPLPCPWAAPTEEGKGPVVITFPGDAVSHLTDRELAARYLQRYGYLTTTHPGGQVKLETPLKAMQKQLGLPETGELDAPTLTAIRAPRCGVPDVGRFQTFEGDLKWDHTDITYRVVNYSPDLDGSIIEDAFARAFKVWSDVTPLTFTRRQDGEVDILIQFGTKEHGDGYPFDGKDGLLAHAFPPGKDQFSGDAHFDDDEFWTLGTGVVVKTHFGNANGALCHFPFIFEGKSYSSCTTEGREDGLPWCATTPDYDQDKKYGFCPSELLFTYDGNGDGEKCVFPFVFEGKSYQGCTTDGRTDGYRWCATTANFDQDKKYGFCPNRDTAVIGGNSQGEPCSFPFKFLGQTYSSCTTDGRTDRRLWCATTSDFDADKKWGFCPDQGYS…	matrix metalloproteinase-9 [Pantherophis guttatus]	XP_034280049.1	87.70
Snake Venom Metalloproteinase P-III Class (SVMP P-III)	SB0235_PPATSVMPIII011	Putative percursor of snake venom metalloproteinase P-III Class	ATGATCCAAGCTCTCTTGGTTACTATATGTTTAGTGGTTTTTCCATATCAAGGGAGCTCTATAAAACTGGAATCCGGGAATGTTAATGATTATGAAGTAGTGTATCCACAAAAAGTGCCTGTATTGCCGAAAGGAGGACTTCAGAATGCTGAGCCAGAGACCGAGTATGAAGATGCAATGCAATATGAATTTCAAGTGAATGGAGAGCCAGTGGTCCTTCACCTAGAAAAAAATAAAGGACTTTTTTCGGAAGATTACAGTGAAACTCATTATTCTCCTGATGGCAGAGAAATTACAACCACCCCTCCAGTTCAGAATCACTGCTATTATCATGGACGCATCCAGAATGAAGCTGACTCAACTGCAGTAATCAGTGCATGTGACGGCCTGAAAGGACAC…	MIQALLVTICLVVFPYQGSSIKLESGNVNDYEVVYPQKVPVLPKGGLQNAEPETEYEDAMQYEFQVNGEPVVLHLEKNKGLFSEDYSETHYSPDGREITTTPPVQNHCYYHGRIQNEADSTAVISACDGLKGHFKHQGETYFIEPLKLSNSEAHAVYKYDSLEKEDEIHKTCGVTQTTWELDEPIEKISQITPEEQNTYLDAKKYIEFFIVVDNRMFRNYSGDLTAIRTRVYEIVNIVNTMYRVLNIYVALIGLEIWSNRDQIHVQSNSSATLEFFGEWREKKLIPRKRNDNAQLITSIVFDEKTLGEAYLASLCFPRESVAVVQDYSNLTSLMAIVMAHELGHNLGMNHDTINCSCNFNPCIMFPSASKVPYYQFSSCSIQEHRRYLSRYQPQCILNK…	venom metalloprotease precursor [Philodryas chamissonis]	AJB84503.1	80.52
	SB0235_PPATSVMPIII010	Putative percursor of snake venom metalloproteinase P-III Class	ATGATCCAAGCTCTCTTGGTTACTATATGTTTAGTGGTTTTTCCATATCAAGGGAGCTCTATAAAACTGGAATCCGGGAATGTTAATGATTATGAAGTAGTGTATCCACAAAAAGTGCCTGTATTGCCGAAAGGAGGACTTCAGAATGCTGAGCCAGAGACCGAGTATGAAGATGCAATGCAATATGAATTTCAAGTGAATGGAGAGCCAGTGGTCCTTCACCTAGAAAAAAATAAAGGACTTTTTTCGGAAGATTACAGTGAAACTCATTATTCTCCTGATGGCAGAGAAATTACAACCACCCCTCCAGTTCAGAATCACTGCTATTATCATGGACGCATCCAGAATGAAGCTGACTCAACTGCAGTAATCAGTGCATGTGACGGCCTGAAAGGACAC…	MIQALLVTICLVVFPYQGSSIKLESGNVNDYEVVYPQKVPVLPKGGLQNAEPETEYEDAMQYEFQVNGEPVVLHLEKNKGLFSEDYSETHYSPDGREITTTPPVQNHCYYHGRIQNEADSTAVISACDGLKGHFKHQGETYFIEPLKLSNSEAHAVYKYDSLEKEDEIHKTCGVTQTTWELDEPIEKISQITPEEQNTYLDAKKYIEFFIVVDNRMFRNYSGDLTAIRTRVYEIVNIVNTMYRVLNIYVALIGLEIWSNRDQIHVQSNSSATLEFFGEWREKKLIPRKRNDNAQLITSIVFDEKTLGEAYLASLCFPRESVAVVQDYSNLTSLMAIVMAHELGHNLGMNHDTINCSCNFNPCIMFPSASKVPYYQFSSCSIQKHRRYLSRYQPQCILNK…	venom metalloprotease precursor [Philodryas chamissonis]	AJB84503.1	85.43
	SB0235_PPATSVMPIII009	Putative percursor of snake venom metalloproteinase P-III Class	ATGATCCAAGCTCTCTTGGTAACTATATGCTTAGTGGTTTTTCCATATCAAGGGAGCTCTATAATCCTGGAATCCGGGAATGTTAATGATTATGAAGTAGTGTATCCACAAAAAGTGCCTGCATTGCCCAAAGGAGGACTTCAGAATGCTGAGCCAGAGACCGAGTATGAAGATACAATGAAATATGAATTTCAAGTGAATGGAGAGCCAGTGGTCCTTCACCTAGAAAGAAATAAAGGACTTTTTTCGGAAGATTACAGTGAAACTCATTATTCCCCTGATGGCAGAGAAATTACAACCAGCCCTCCGGTTCAGGAACACTGCTATTATCATGGTTACATTCAGAATGATGCCGACTCAACTGCAGTCATCAGTGCATGCAATGGTTTGAAAGGACAT…	MIQALLVTICLVVFPYQGSSIILESGNVNDYEVVYPQKVPALPKGGLQNAEPETEYEDTMKYEFQVNGEPVVLHLERNKGLFSEDYSETHYSPDGREITTSPPVQEHCYYHGYIQNDADSTAVISACNGLKGHFKHQGETYLIEPLKLSNSEAHAVYKYENVEKEDETHKTCGVTQTTWESDEPIEKSPQLVVTPEQLRYLQAPKYIELFIVVDNVMFRKYTGNLTAIRTRVYEIVNTLNMIYRVLNIHVALIGLEIWSNQDKINVQSAANITLDLFGEWRETDLLPRRRNDNAQLLTGINLGGLTLGLGYVGALCLSKQSTAIVQDHSKIASLVASTMAHEMGHNLGINHDTASCTCQPNTCIMSAILGFKPSYQFSSCSYQEHQRYLIKELPECILN…	snake venom metalloproteinase 5, partial [Borikenophis portoricensis]	AXL96555.1	82.33
	SB0235_PPATSVMPIII008	Putative percursor of snake venom metalloproteinase P-III Class	ATGATCCAAGCTCTCTTGGTAACTATAAGCTTAGTGGTTTTTCCATGTCAAGGGAACTCGATAAAACTGGAATCCGGGAATGTTAATGATTATGAAGTAGTGTATCCACAAAAAACGCCTATATGGCCCAGAGGAGGACTTCAGAATGCTGAGCCAGAGACCGAATATGAAGATGCAATGCAATTTGAATTTCACGTGAATGGAGAGCCAGTGGTCCTTCACCTAGAAAGAAATAAAGGACTTTTTTCAGAAGATTACAGTGAAACTCATTATTCCCCTGATGGCAGAGAAATTACAACCACCCCTCCAGTTCAGGATCACTGCTATTATCATGGACACATCAAGAATGAAGCTGACTCAACTGCAGTCATCAGTGCATGCAATGGTTTGAAAGGACAT…	MIQALLVTISLVVFPCQGNSIKLESGNVNDYEVVYPQKTPIWPRGGLQNAEPETEYEDAMQFEFHVNGEPVVLHLERNKGLFSEDYSETHYSPDGREITTTPPVQDHCYYHGHIKNEADSTAVISACNGLKGHFKHQGETYFIEPLKLSNSEAHAVYKYDSLEKEDETHKTCGVTQTTWELDEPIEKISQVSITPEEQNTYLNAKKYIEFFIAVDNGMFRKYSSNLTAIRTRVYETVNTLNTIYRTLNIHVALIGLDIWSNRDQINVQSAANVTLDLFGTWRQTVLLPRRRNDNAQLITSIDFDGPTVGLGYVGTLCRPKHSSAIVQDHSDLTSLMASTMAHELGHNLGINHDTNACQCSSNACVMSPTIGSVPYYQFSSCSIQEHRRYLTRAQPQCIL…	venom metalloprotease precursor [Philodryas chamissonis]	AJB84503.1	93.13
	SB0235_PPATSVMPIII007	Putative percursor of snake venom metalloproteinase P-III Class	ATGATCCAAGCTCTCTTGGTTACTATATGCTTAGTGGTTTTTCCATATCAAGGGAACTCGATAAAACTGGAATCCGGGAATGTTAATGATTATGAAGTAGTGTATCCACAAAAAACGCCTATATGGCCCAGAGGAGGACTTCAGAATGCTGAGCCAGAGACCGAGTATGAAGATGCAATGCAATATGAATTTCAAGTGAATGGAGAGCCAGTGGTCCTTCACCTAGAAAGAAATAAAGGACTTTTTTCAGAAGATTACAGTGAAACTCATTATTCCCCTGATGGCAGAAAAATTACAACAAGCCCTCCAGTTAAGGATCACTGCTATTATCATGGACACATCCAGAATGAAGCTGACTCAACTGCAGTCATCAGTGCATGCAATGGTTTGAAAGGACAT…	MIQALLVTICLVVFPYQGNSIKLESGNVNDYEVVYPQKTPIWPRGGLQNAEPETEYEDAMQYEFQVNGEPVVLHLERNKGLFSEDYSETHYSPDGRKITTSPPVKDHCYYHGHIQNEADSTAVISACNGLKGHFTRQGETYFIEPLKLSNSEAHAVYKYDSLEKEDETHKTCGVTQTTWELDEPIEKISQVSITPEEQNAYLDAQKYIEFFIVVDNRMFRKYSSNFTVISRRVYEIVNTLNTICRALKIHVALTGLEIWSNGDQIKMQKNSTETLKLFGEWREKDLLPRKRNDYTQLLTDIYFDEATLGEAHFGTLCQSRKSAAVVVDHTHSPGIMASTMAHELGHNLGIRHDRKSCNCNFYRCIMFPSVSYEPIIQFSNCSIQDYRRYLIKRQPQCIL…	venom metalloprotease precursor [Philodryas chamissonis]	AJB84503.1	75.93
	SB0235_PPATSVMPIII006	Putative percursor of snake venom metalloproteinase P-III Class	ATGATCCAAGCTCTCTTGGTTACTATATGTTTAGTGGTTTTTCCATATCAAGGGAGCTCTATAAAACTGGAATCCGGGAATGTTAATGATTATGAAGTAGTGTATCCACAAAAAGTGCCTGTATTGCCGAAAGGAGGACTTCAGAATGCTGAGCCAGAGACCGAGTATGAAGATGCAATGCAATATGAATTTCAAGTGAATGGAGAGCCAGTGGTCCTTCACCTAGAAAAAAATAAAGGACTTTTTTCGGAAGATTACAGTGAAACTCATTATTCTCCTGATGGCAGAGAAATTACAACCACCCCTCCAGTTCAGAATCACTGCTATTATCATGGACGCATCCAGAATGAAGCTGACTCAACTGCAGTAATCAGTGCATGTGACGGCCTGAAAGGACAC…	MIQALLVTICLVVFPYQGSSIKLESGNVNDYEVVYPQKVPVLPKGGLQNAEPETEYEDAMQYEFQVNGEPVVLHLEKNKGLFSEDYSETHYSPDGREITTTPPVQNHCYYHGRIQNEADSTAVISACDGLKGHFKHQGETYFIEPLKLSNSEAHAVYKYDSLEKEDEIHKTCGVTQTTWELDEPIEKISQITPEEQNTYLDAKKYIEFFIVVDNRMFRNYSGDLTAIRTRVYEIVNIVNTMYRVLNIYVALIGLEIWSNRDQIHVQSNSSATLEFFGEWREKKLIPRKRNDNAQLITSIVFDEKTLGEAYLASLCFPRESVAVVQDYSNLTSLMAIVMAHELGHNLGMNHDTINCSCNFNPCIMFPSASKVPYYQFSSCSIQEHRRYLSRYQPQCILNK…	venom metalloprotease precursor [Philodryas chamissonis]	AJB84503.1	76.26
	SB0235_PPATSVMPIII005	Putative percursor of snake venom metalloproteinase P-III Class	ATGATCCAAGCTCTCTTGGTAACTATATGCTTAGCGGTTTTTCCATATCAAGGGAGCTCTATAATCCTGGAATTCGGGAATGTTAATGATTATGAAGTAGTGTATCCACAAAAAGTGCCTGTATTGCCCAAAGGAGGACTTCAGAATGCTGAGCCAGAGAGCAAGTATGAAGATACAATACAATATGAATTTCAAGTGAATGGAGAGCCAGTGGTCCTTCACCTAGAAAGAAATAAAGGACTTTTTGCAGAAGATTACAGTGAAACTCATTATTCCCCTGATGGCAGAGAAATTACAACCACCCCTCCAGTTCAGGATCACTGCTATTATCATGGTTACATTCAGAATGATGCTGACTCAACTGCAGTCATCAGTGCATGCAATGGTTTGAAAGGACAT…	MIQALLVTICLAVFPYQGSSIILEFGNVNDYEVVYPQKVPVLPKGGLQNAEPESKYEDTIQYEFQVNGEPVVLHLERNKGLFAEDYSETHYSPDGREITTTPPVQDHCYYHGYIQNDADSTAVISACNGLKGHFKHQGETYFIEPLKLSNSEAHAVYKYGSLEKEDEIHKTCGVTQTTWESDEPIESPQLMVTPEQLRYLNARKYIELYIVVDNVMFRKYTGNLAAIRTRVYEIVNTLNMIYRVLNIYVALIGIEIWSIQDQINVQSTVNVTLDLFGAWRETVLLPRRNHDNAQLLTGINFDGQTVGFGYVGGLCLQKQSAAIVQDHSKIASLVATTMAHEMGHNLGINHDTASCTCQPNTCIMSAILGFEPSYQFSSCSIQEHQRYLIRTLPQCILNR…	snake venom metalloprotease [Philodryas olfersii]	ACS74986.1	94.98
	SB0235_PPATSVMPIII004	Putative percursor of snake venom metalloproteinase P-III Class	ATGATCCAAGCTCTCTTGGTAACTATATGCTTAGTGGTTTTTCCATATCAAGGAAGCTCTACAATCCTGAAATCTGGAAAAGTTAAAGATTATGAAATAGTGTATCCACAAAAAGTCCTTCCATTGTCCACAAGAGGAACTGAGTGGCGTGAGGAAAAGAACAAATATGAAGACACCGTGAAATATGAATTTAAAGTGAATGGAGAGCCAGTGGTCCTTAACCTAGAAAAAAATAAACGACTTTTTTCCAAAGATTACACTGAGACTCATTATTCCCCTGATGGCAGAGAAATTACAACAAGCCCTCCAATTGAGGATCACTGCTATTATCATGGTTCCATTCAGAATGATGCCGACTCAACTGCAGTCATCAGTGCTTGTGACGGCTTGAATGGGTAT…	MIQALLVTICLVVFPYQGSSTILKSGKVKDYEIVYPQKVLPLSTRGTEWREEKNKYEDTVKYEFKVNGEPVVLNLEKNKRLFSKDYTETHYSPDGREITTSPPIEDHCYYHGSIQNDADSTAVISACDGLNGYFKNNGEMYLIEPLKPSDNEAHAVYKYESLEKEDETPKKCGAIYSSGKSDEPIKKTSKLFSTPEEKEEYLESKKYIELYIVADNLIYRKYNHNITTIRMRVFEILNYVNLFYKPLNIHVAMIGLEIWSDEDKIVISASSKSTVTFFAAWRHSDLLPRKKNDNAQLLTGMSFDGHVLGIAYVGQMCNYLESVGVIQDNNNKAELVASTMTHEMGHNLGMDHDTDSCTCKTGPCIMKAAIGFYPPLQFSSCSLWDYENYVMSENAQCIL…	metalloproteinase [Dispholidus typus]	QGC85372.1	77.58
	SB0235_PPATSVMPIII003	Putative percursor of snake venom metalloproteinase P-III Class	ATGATCCAAGTACTCTTGGTAACTATATGCTTAGTGGTTTTTCCATATCAAGGGAACTCTATGAAACTGAAATCCGGGAATGTTAATGATTATGAAGTAGTGTATCCACAAAAAACGCCTATATGGCCCAGAGGAGGACTTCAGAATGCTGAGCCAGAGACTGAGTATGAAGATGCAATGCAATATGAATTTCACGTGAATGGAGAGCCAGTGGTCCTTCACCTAAAAAGAAATAAAGGACTTTTTTCAGAAGATTACAGTGAAACTCATTATTCCCCTGATGGCAGAGAAATTACAACCACCCCTCCAGTTTGGAATCACTGCTATTATCATGGACACATACAGAATGAAGCTGACTCAACTGCAGTCATCAGTGCATGTGACGGCTTGAAAGGACAT…	MIQVLLVTICLVVFPYQGNSMKLKSGNVNDYEVVYPQKTPIWPRGGLQNAEPETEYEDAMQYEFHVNGEPVVLHLKRNKGLFSEDYSETHYSPDGREITTTPPVWNHCYYHGHIQNEADSTAVISACDGLKGHFKHQGETYFIEPLKLSNSEAHAVYKYDSLEKEDETHKTCGVTQTTWELDEPIEKISQVSITPEEQNTYLDAPKYIEFFIVVDNGMFRKYSSNLTAIRTRVYETVNTLNTIYRVLNIHVALIGVEIWSNRDKINVQSAANVTLDLFGTWRETDLLPRRRNDNAQLITSIDFNGPTVGLGYVGTFCRPKHSSAIVQDHSALTSLMASTMAHEMGHNLGINHDTNACQCSSNACVMSPTIGNVPNYQFSSCSIQEHRRYLTRAQPQCIL…	snake venom metalloprotease [Philodryas olfersii]	ACS74988.1	91.33
	SB0235_PPATSVMPIII002	Putative percursor of snake venom metalloproteinase P-III Class	ATGATCCAAGCTCTCTTGGTAACTATATGCTTAGCAGTTTTTCCATATCAAGGGAGTTCTATAATCCTGGAAGCTGGGAAAGTTAACGATTATGAAGTAGTATATCCACAAAAAATCCCTGCATTGGCCAGAAGCAGAATTGAGCGACGTGAGCAAAAGATGAAGTATGAAGATACCATGAAATATGAATTTAAAGTGAATGGAGAGCCAGTGGTCCTTCACTTAGAAAAAAATAGAGGACTTTTTTCCAAAGATTACACTGAGACTCATTATTCCCCTGATGGCAGAGAAATTACAACAAGCCCTCCAGTTGAGGATCACTGCTATTATCATGGTTACATTCAGAATAATGCCGACTCAACTGCAGTCATCAGTGCATGCGACGGCTTGAATGGGTAT…	MIQALLVTICLAVFPYQGSSIILEAGKVNDYEVVYPQKIPALARSRIERREQKMKYEDTMKYEFKVNGEPVVLHLEKNRGLFSKDYTETHYSPDGREITTSPPVEDHCYYHGYIQNNADSTAVISACDGLNGYFKNNGEMYLIEPLKTSDNEAHAVYKYESLEKEDEIPKTCGAIHSSGKSDESIKKTSKLFSSPKEKEEYLESKKYVELYIVADNLIFRKYDRNITTIRTRVSQILNYVNQFYKPLNIHMALIGLEIWSDEDKIVINASSESTVTFFAAWRHSDLLPRKKNDNAQLLTGVHFNGQTLGIAFIGGMCNFWLSVGVIQDNNNQAVLTASIMTHEMGHNLGMQHDTDSCTCNKEPCIMEPAIDFYPPLQFSSCSLWYYEKYVMSENAQCIL…	metalloproteinase [Dispholidus typus]	QGC85372.1	76.13
	SB0235_PPATSVMPIII001	Putative percursor of snake venom metalloproteinase P-III Class	ATGATCCAAGCTCTCTTGGTTACTATATGTTTAGTGGTTTTTCCATATCAAGGGAGCTCTATAAAACTGGAATCCGGGAATGTTAATGATTATGAAGTAGTGTATCCACAAAAAGTGCCTGTATTGCCGAAAGGAGGACTTCAGAATGCTGAGCCAGAGACCGAGTATGAAGATGCAATGCAATATGAATTTCAAGTGAATGGAGAGCCAGTGGTCCTTCACCTAGAAAAAAATAAAGGACTTTTTTCGGAAGATTACAGTGAAACTCATTATTCTCCTGATGGCAGAGAAATTACAACCACCCCTCCAGTTCAGAATCACTGCTATTATCATGGACGCATCCAGAATGAAGCTGACTCAACTGCAGTAATCAGTGCATGTGACGGCCTGAAAGGACAC…	MIQALLVTICLVVFPYQGSSIKLESGNVNDYEVVYPQKVPVLPKGGLQNAEPETEYEDAMQYEFQVNGEPVVLHLEKNKGLFSEDYSETHYSPDGREITTTPPVQNHCYYHGRIQNEADSTAVISACDGLKGHFKHQGETYFIEPLKLSNSEAHAVYKYDSLEKEDEIHKTCGVTQTTWELDEPIEKISQITPEEQNTYLDAKKYIEFFIVVDNRMFRNYSGDLTAIRTRVYEIVNIVNTMYRVLNIYVALIGLEIWSNRDQIHVQSNSSATLEFFGEWREKKLIPRKRNDNAQLITSIVFDEKTLGEAYLASLCFPRESVAVVQDYSNLTSLMAIVMAHELGHNLGMNHDTINCSCNFNRCIMFPSASKVPYYQFSSCSIQEHRRYLSRYQPQCILNK…	venom metalloprotease precursor [Philodryas chamissonis]	AJB84503.1	80.16
Snake Venom Serinoproteinase (SVSP)	SB0235_PPATSVSP002	Putative percursor of snake venom serinoproteinase	ATGGCGCTGATCGGAGTGCTAGCAAACCTTCTGATACTATGCCTTTCTTACGCAAGAACCGCTCCTGATCAGATCATTGGCGGCTTGGAATGTAACCAAAATGAACATCGTTCCCTTGTACTCTTGTATAACTCTGGAGGGTTTTTCTGCTCTGGGACCTTGATTAACCACGAATGGGTGCTCACCGCTGCACACTGCAACAGAGAAAATATCCATATAATGCTTGGTATGCATAGCATACATGTACCCAATGAGGATGAGCAGATAAGAGTCCCGAAGGAGAAGGTGTGTTGTCTCGGTACCAAGAACTGTACCCAATGGAACCAGGACATCATGTTGATCAGGCTGAACAGTTCTGTTAACAATAGTCCACACATCGCACCACTCAGCTTGCCCTCC…	MALIGVLANLLILCLSYARTAPDQIIGGLECNQNEHRSLVLLYNSGGFFCSGTLINHEWVLTAAHCNRENIHIMLGMHSIHVPNEDEQIRVPKEKVCCLGTKNCTQWNQDIMLIRLNSSVNNSPHIAPLSLPSNPPRVGSVCRVMGWGTITSPKVTYPKVPHCVNIQILHKQVCEAAYPILLWNNNVLCAGELLGEKDSCKGDSGGPLICNGQIQGIVSWGHFNCGQILEPGVYTKVFDYLDWIQGIMAGNANVICPGDNF	RecName: Full=Snake venom serine protease; Short=SVSP; Flags: Precursor [Philodryas olfersii]	Q09GK1.1	91.19
	SB0235_PPATSVSP001	Putative percursor of snake venom serinoproteinase	ATGGCGCTGATCGGAGTGCTAGCAAACCTTCTGATACTATGCCTTTCTTACGCAAGAACCGCTCCTGATCGGATCATTGGCGGCTTGGAATGTAACCAAAATGAACATCGTTCCCTTGTACTCTTGTATAACTCTGGAGGGTTTTTCTGCTCTGGGACCTTGATTAACCACGAATGGGTGCTCACCGCTGCACACTGCAACAGCGAAAATATCCAGATAAAGCTTGGTATGCATAACATGCATGTACCCAATGAGGATGAGCAGATAAGAGTCCCGAAGGAGAAGGTGTGTTGTCTCGGTGCCAATAACTGTACCCAATGGAACCAAGACATCATGTTGATCAGGCTGAACAGTTCTGTTAACAATAGTCCACACATCGCACCGCTCAGCTTGCCCTCC…	MALIGVLANLLILCLSYARTAPDRIIGGLECNQNEHRSLVLLYNSGGFFCSGTLINHEWVLTAAHCNSENIQIKLGMHNMHVPNEDEQIRVPKEKVCCLGANNCTQWNQDIMLIRLNSSVNNSPHIAPLSLPSNPPRVGSVCRVMGWGTITSPEVTYPEVPHCVNIQILHKEVCEASYPILLGNNNVLCAGELLGEKDSCKGDSGGPLICNGQIQGIVSWGHFNCGQILEPGVYTKVFDYIDWIQGIMVGNANVICPGENISE	RecName: Full=Snake venom serine protease; Short=SVSP; Flags: Precursor [Philodryas olfersii]	Q09GK1.1	91.95
Vascular Endothelial Growth Factor (VEGF)	SB0235_PPATVEGF001	Putative percursor of snake venom vascular endothelial growth factor	ATGAACTTTCTGCTCACTTGGATCCACTGGGGGTTGGCGGCGCTGCTTTATTTCCACAACGCCAAGGTGTTGCAGGCTGCTCCTGCCCAGGTGGATGGAGAGAGGCAACAAGGTGAAGTTATCTCGTTTATGAAGGTCTATGAGCGCAGTGCCTGCAGGGCAATTGAGACCATGGTAGATATTTTCCAGGAGTATCCTGATGAGGTGGAATACATCTTCAAGCCATCCTGTGTGGCCCTGATGAGATGTGCAGGATGCTGTAATGATGAAGCACTAGAATGTGTGCCTACAGAGGTGTACAATGTCACAATGGAGATCATGAAACTCAAACACTTTCAGAGCCAGCATATACATCCGATGAGCTTCCTGCAGCACAGTAGATGTGAATGCAGACCAAAG…	MNFLLTWIHWGLAALLYFHNAKVLQAAPAQVDGERQQGEVISFMKVYERSACRAIETMVDIFQEYPDEVEYIFKPSCVALMRCAGCCNDEALECVPTEVYNVTMEIMKLKHFQSQHIHPMSFLQHSRCECRPKKEVRIRQEKKSKRGKGKGQKRKRKRGRYKPQNFHCEPCSERRKHLYKQDPLTCKCSCKFTDSRCKSKQLELNERTCRFVS	vascular endothelial growth factor A isoform X1 [Thamnophis elegans]	XP_032072240.1	94.76
Waprin Protein (WAP)	SB0235_PPATWAP004	Putative percursor of snake venom Waprin protein	ATGAAACCTTGGATTCTACTTCTCCTAGCTGGTCTCCTCATTCTTTCAACTCAACAGACATCGGCAAAGCCCGAAAGAAGTTGTTCCGAAATAGTCAAACCGGGTGAGTGTCCCATGTTCAAAATCTCTCCTGACCTTCCATGTGACCAAAACTGTCAGTGGGACTCTAACTGTGAAGGGAATATGAAATGTTGCCCGATGGGATGTGCCAAGGTCTGTTTCCCCCCAGGACCACTCTGA	MKPWILLLLAGLLILSTQQTSAKPERSCSEIVKPGECPMFKISPDLPCDQNCQWDSNCEGNMKCCPMGCAKVCFPPGPL	waprin-Phi3-like isoform X2 [Pseudonaja textilis]	XP_026579255.1	64.79
	SB0235_PPATWAP003	Putative percursor of snake venom Waprin protein	ATGAAACCTTGGATTCTACTTCTCCTAGCTGGTCTCCTCATTCTTTCAACTCAACAGACATCGGCAAAGCCCGAAAGAAGTTGTTCCGAAATAGTCAAACCGGGTGAGTGTCCCATGTTCAAAATCTCTCCTGACCTTCCATGTGACCAAAACTGTCAGTGGGACTCTAACTGTGAAGGGAATATGAAATGCTGCCCGATGGGATGTGCCAAGGTCTGTTTCCCCCCAGGACCTCTGAGCCCCAAGATCTGA	MKPWILLLLAGLLILSTQQTSAKPERSCSEIVKPGECPMFKISPDLPCDQNCQWDSNCEGNMKCCPMGCAKVCFPPGPLSPKI	waprin-Phi3-like isoform X2 [Pseudonaja textilis]	XP_026579255.1	64.79
	SB0235_PPATWAP002	Putative percursor of snake venom Waprin protein	ATGAAACCTTGGATTCTTCTCCTCCTGGCTGGTCTCCTCATTCTTTCAACTCAGCTAACAACAGCAAAGACCACCAAACAACTTCGCCTTCCAAAAGTCAAGCCAGGCCAGTGTCCCAAAGTCAAAATCCCTCCTGACTACCCTTGTAACCAATACTGTGTCTGGGACTCCGACTGCAAAGGGAATAAGAAATGTTGCCCAGTTGGATGCGCCAAGGAGTGTTTCCCCCCAGGACCTCTGAGCCCCAAGATCTGA	MKPWILLLLAGLLILSTQLTTAKTTKQLRLPKVKPGQCPKVKIPPDYPCNQYCVWDSDCKGNKKCCPVGCAKECFPPGPLSPKI	RecName: Full=Waprin-Phi3; Flags: Precursor [Philodryas olfersii]	A7X4M7.1	96.25
	SB0235_PPATWAP001	Putative percursor of snake venom Waprin protein	ATGACGCTCAGGAGAGGCAGCTGCCCCTTCTTCCTCTTCTCCCTGGTGGGTCTCCTCACCACCTGTGCTCAGGAGCCCGACGACGCGGCTGGACAGAACACCACAGTGGTCGCAGAGAAAGCTGGCACCTGTCCCCAGCCAGAGTTGGAGATGTCCAATGGGAACTGCACCGAGGAGTGCCAATCCGATGCCGGCTGCGAGGAGAACAAGAAGTGCTGCTGGACAGGATGTGGGACTTCCTGCCAAATCCCAGACGGGAAACCCGGGTCCTGCCCAAATGTGGACGTGCCCATCCCGCCTCTGGGTCTTTGCCAAACCACGTGTAGTAACGATTCACACTGTTCAGGGACGAGGAAATGCTGCAAAAATGGCTGCGGGTATATGACTTGTACCACGGCC…	MTLRRGSCPFFLFSLVGLLTTCAQEPDDAAGQNTTVVAEKAGTCPQPELEMSNGNCTEECQSDAGCEENKKCCWTGCGTSCQIPDGKPGSCPNVDVPIPPLGLCQTTCSNDSHCSGTRKCCKNGCGYMTCTTARP	RecName: Full=Waprin-Phi1; Flags: Precursor [Philodryas olfersii]	A7X4K1.1	86.67

## Sheet: P. NATTERERI
Table S2. Identification and annotation of transcripts of putative toxins from the venom glands of Philodryadini snakes.
Philodryas nattereri
Toxin group	Sequence code	Annotation	Nucleotide sequence	Amino acid sequence	BLAST identification	Accession number	Identity %
Cobra Venom Factor (CVF)	SB0307_PNATCVF001	Putative percursor of snake venom Cobra Venom Factor	ATGAATTCAGCAGGAGGCATGCTTGTCACTCCAACTATAAATATTCCTGCAAAAGAACTGAATAAGGAGTCTAGGCAAAATCAGTATGTGGTTGTGCAAGTAACTGGTCCTGAAGTGAGATTGGAAAAAGTGGTTCTCCTTTCTTACCAGAGTGGCTTTGTGTTCATCCAGACAGATAAAGGCATCTATACACCAGGCTCTCCAGTGCGATATCGTGTTTTTTCTATGGATCACAACATGCACAGGATGGACAAAACTGTGATTGTCGAGTTTCAGACTCCACAAAACATTGTTGTCAGTTCTAATCCAATCAATCCATCTTCACCCTTGATCCGGCCTTACAATTTACCAGAACTTGTCAGTTTTGGGACATGGAAGGCTGTGGCCAAATATGAAAAT…	MNSAGGMLVTPTINIPAKELNKESRQNQYVVVQVTGPEVRLEKVVLLSYQSGFVFIQTDKGIYTPGSPVRYRVFSMDHNMHRMDKTVIVEFQTPQNIVVSSNPINPSSPLIRPYNLPELVSFGTWKAVAKYENSPEESYTAYFDVREYVLPSFEVRLQPSEKFLYIDGNKNFHVSITARYLYGKKVEGVAFVLFGVKIDGDKMSIPESLTRIPIIDGDGDATLEGHKLRSRFQNLNKLVGHTLYVSVTVITESGSDMVVTEQSGIHIVTSPYQIYFTKTPKYFKPGMPYELTVYVTNPDGSPAANVPVIGTSEAIRSEGTTLSDGTAKLILNTPLNTQNLPITVRTNHGDLLRERQATKSMTATAYQTQGGSGNYLHVAITSIEIKPGDNLPVNFNVRG…	cobra venom factor, partial [Spilotes sulphureus]	AXL95279.1	92.85
C-type Lectin (CTL)	SB0307_PNATCTL007	Putative percursor of snake venom C-type lectin	ATGGGGCGATTCATCCTTCTGACCCTCGGCTTGCTGGTCGTGGCTTTCTCCCTAAATGGAATTGGAGCTGATCACCCTTGCCCCACGGACTGGTCCTCCTTTGAACACTTTTGCTACAAGTTCTTCAAACTACGGAAGACCTGGGAAGAGGCAGAGACGTTCTGCGTCCAAGAGCAGAATGGCAGCCATCTCGCCTCCATCCAAAGCTGGACAGAGTCAGCTTACGTGGCCAGGCTGGTCTCCATAAATATGCCCTTCTCCGATGTCTGGATCGGACTGAAGTGTCCAGAGAAAAATTGCACCTGGGAATGGAGTGATGGCTCCAACTTCACTTACACATCCTGGCAAATAAGCAAACCTAACAATGGTGGTGATAAGGAGTACTGCGTTGCGCTAGCC…	MGRFILLTLGLLVVAFSLNGIGADHPCPTDWSSFEHFCYKFFKLRKTWEEAETFCVQEQNGSHLASIQSWTESAYVARLVSINMPFSDVWIGLKCPEKNCTWEWSDGSNFTYTSWQISKPNNGGDKEYCVALAKWSGYLGWKDINCETKSFFICKLQPKSDGSN	RecName: Full=C-type lectin lectoxin-Lei1; Short=CTL; Flags: Precursor [Leioheterodon madagascariensis]	A7X401.1	61.54
	SB0307_PNATCTL006	Putative percursor of snake venom C-type lectin	ATGGGGCGATTCAGCTTTCTGACCTTTGGCTTGCTGGTCATGGCTTTCTCCCTAAATGGAGCCAAAGGCTGTTGTTGTCCCCAAGACTGGCTCCCCATGAATGGGTTTTGCTACAAGGTCTTCGAGCCCCAAAAGAACTGGACCGATGCCAAGATGTTCTGCAGAAAACACAAGCCAGGCTGCCACCTCGCCTCCATCCATGACAGTGAAGAGTCAGATGACTTGGGTGAATATGTTTCTGACTATCTCAGAAGTGACGGAAATGTCTGGATTGGATTGAGTGACCCACAGAAACAACGCAATTGGCAGTGGACAGACAGATCCAATAGCAGGTACCTGACGTGGAAGCAAGGAGAGCCCAACAACAATGGGAACAATGAATATTGTGTTGAGCTTTGG…	MGRFSFLTFGLLVMAFSLNGAKGCCCPQDWLPMNGFCYKVFEPQKNWTDAKMFCRKHKPGCHLASIHDSEESDDLGEYVSDYLRSDGNVWIGLSDPQKQRNWQWTDRSNSRYLTWKQGEPNNNGNNEYCVELWSPSGYQKWNDENCASTRAFLCKCRF	C-type lectin 3, partial [Ahaetulla prasina]	AXL96600.1	81.65
	SB0307_PNATCTL005	Putative percursor of snake venom C-type lectin	ATGGGGAGATTCATCTTTGTGAACCTGGGCTTGCTGGTCGTGGCTTTCTCCCTAAGGGGATCTGAAGCTTGTTGTCCCTGCGGTTGGTCCTCCTATGATAAGTATTGCTACAAGGTCTTCGATAAACGCAAGAATTGGGACGATGCCGAGAGGTTCTGCATGGAGCAGGGGAAAGGCGGCCATCTGGCCTCTCTCGGAAGCCTTGAAGAGGGAAAATTTGTGGGCAAACTCGCCTTTAAAAAATTAAAGGAACACCCGACCTATGTCTGGACCGGACTGAGGGCTCAAGGCCAAGGCCAGCAATGCAGCTCGAGGTGGAGTGATGGCTCCAGGATCCTTTATGAAAACTGGCATCCATTACAATCCAGAAAATGCATTGCGTTGTCTAAATGGACGGAG…	MGRFIFVNLGLLVVAFSLRGSEACCPCGWSSYDKYCYKVFDKRKNWDDAERFCMEQGKGGHLASLGSLEEGKFVGKLAFKKLKEHPTYVWTGLRAQGQGQQCSSRWSDGSRILYENWHPLQSRKCIALSKWTEYLKWYNHICDFTLPFICKFLAEPDDPE	RecName: Full=Snaclec subunit A; AltName: Full=C-type lectin subunit A; Flags: Precursor [Philodryas olfersii]	Q09GJ8.1	97.50
	SB0307_PNATCTL004	Putative percursor of snake venom C-type lectin	ATGGGGAGATTCATCTTTGTGAAACTGGGCTTGCTGGTCGTGGCTTTCTCCCTAAGGGGATCTGGAGCGGATTGTCCCTCTGGTTGGTCCTCCTATGATAAGTATTGTTACAAGGTCTTTGATGAACGCAAGAATTGGGACGAAGCAGAGAGGTTCTGCATGGAGCACAAGACAGGCAGCCATCTGGCCTCCATCCTTAGCAGTGAAGAAGGATCTTATGTGGCCAATCTGGCCTTCAAACGTGTGAAGCACCCTTCTATGTGGATCGGACTGAGTAATATATGGAATCAATGTAGCTGGCAGTGGAGTGATGGCTCCAGCCTCGGTTACGAAGCCTGGGTTGAAGGACCCGATTGTGTTATGATGCGTTTACAGCCAGGTTTTATCGAGTGGTACAGT…	MGRFIFVKLGLLVVAFSLRGSGADCPSGWSSYDKYCYKVFDERKNWDEAERFCMEHKTGSHLASILSSEEGSYVANLAFKRVKHPSMWIGLSNIWNQCSWQWSDGSSLGYEAWVEGPDCVMMRLQPGFIEWYSVECKSTLPFTCKFLAKREDPAPE	c-type lectin-like protein precursor beta subunit [Philodryas chamissonis]	AJB84507.1	97.44
C-type Natriuretic Peptide (CNP)	SB0307_PNATCNP003	Putative percursor of snake venom C-type Natriuretic Peptide	ATGTTCGCCTCCCGTCTGGCGGCCGGCGGGCTGCTCTTGCTGGCCCTGCTGGCTCTGGCCCTCGACGGCAAGCCGGCGCCGCTGCGGAAGGCGCCCGCGGGCGGCGCGAGCGCGTTGACGGGGGTGCGGAGGGAGCAGCCGGAGCGGTCGGAGGGGCCCTCGGCTGCCGGAGGAGGAGGAGGAGGAGGCGGCGGCCGCGGCGGCTCCAAGGCGGCCAATGCGGCCCCGACGGCACCGAAGAGCAAAGGGGCGGCGGCGGCGGCGGCGGCGGCGGCGCGGCTGATGCGGGATTTGCGCCCCGACAGCAAGCAGGCGCGGGCCGCCTGGGGCCGGATGGTGCACCCCGAGCACCACGCAGGAGGCGGCGGCGGCGGTGGAGGCGGCGGCGGCGGCGGCGGG…	MFASRLAAGGLLLLALLALALDGKPAPLRKAPAGGASALTGVRREQPERSEGPSAAGGGGGGGGGRGGSKAANAAPTAPKSKGAAAAAAAAARLMRDLRPDSKQARAAWGRMVHPEHHAGGGGGGGGGGGGGGASRRLKGVAKKGLGKGCFGLKLDRIGSMSGLGC	natriuretic peptide [Calliophis bivirgatus]	QSI84022.1	71.14
	SB0307_PNATCNP001	Putative percursor of snake venom C-type Natriuretic Peptide	ATGTTCGCCTCCCGTCTGGCGGCCGGCGGGCTGCTCTTGCTGGCCCTGCTGGCTCTGGCCCTCGACGGCAAGCCGGCGCCCTCGCAGCCGCTGCGCAAGGCTCCGGCGGGCGGCACGACGGCGTTGCGGCGGGAGCTGACGGAGCAGCCGGAGGGGTCCTCGGGTCCCGCGGCTGGAGGAGGAGGAGGAGGAGGAGGCGGCGGCCGCGGCGGCTCCAAGGCGGCCAATGCGGCCCCGACGGCACCGAAGAGCAAAGGGGCGGCGGCGGCGGCGGCGGCGGCGGCGCGGCTGATGCGGGATTTGCGCCCCGACAGCAAGCAGGCGCGGGCCGCCTGGGGCCGGATGGTGCACCCCGAGCACCACGCAGGAGGCGGCGGCGGCGGTGGAGGCGGCGGCGGC…	MFASRLAAGGLLLLALLALALDGKPAPSQPLRKAPAGGTTALRRELTEQPEGSSGPAAGGGGGGGGGGRGGSKAANAAPTAPKSKGAAAAAAAAARLMRDLRPDSKQARAAWGRMVHPEHHAGGGGGGGGGGGGGGASRRLKGVAKKGLGKGCFGLKLDRIGSMSGLGC	natriuretic peptide precursor [Philodryas chamissonis]	AJB84508.1	90.59
Cystatin-C (CYS)	SB0307_PNATCYS001	Putative percursor of snake venom Cystatin-C	ATGGCTTTGTCGTGGTGGCTTTTGGTGTGCGGCTTACTCTTGCGCAGTTGTGTCTGCAAGCAGGCGACCGGGACCAGGCTCCTCGGGGGACTGGAGGATGCTTCCCCGGAGGACCCGGACGTCCATAAGGCCCTTCAATTTGCCATGAACGAATACAACAGAGGAAGCAACGATATGTATCATAGTCGCGTATCCGAAGTGGTGCGAGCCCAAAAACAGATTGTCAGCGGAATTAAGTATTACTTCACTGTTACGATTGGACGTACTGTTTGCCGTAAGGGAGCAGCTGACCTTGAAAATTGTGCATTTCATAGCACACCTAAACTGGCACAGACAATGACTTGCACTTTTGAAGTTTACAATATTCCTTGGAGAAACATCATTTCCCTGGAAAAAAGT…	MALSWWLLVCGLLLRSCVCKQATGTRLLGGLEDASPEDPDVHKALQFAMNEYNRGSNDMYHSRVSEVVRAQKQIVSGIKYYFTVTIGRTVCRKGAADLENCAFHSTPKLAQTMTCTFEVYNIPWRNIISLEKSSCT	Cystatin-C, partial [Ophiophagus hannah]	ETE66625.1	80.15
Cysteine-rich secretory protein (CRISP)	SB0307_PNATCRISP001	Putative percursor of snake venom Cystatin-C	ATGATTGTCTTGCTAAGTCTTGCTGCAGTGCTGCAACAGTCTTTTGGACTTGTTGATTTTAATTCTGAGTCACCCAGGAGACCAGAAGTACAAAGGGTGATTGTTGACACGCACAATTCTTACAGAAGATCTGTCAGTCCAACTGCTAGCAACATGCTAAGAATGGAATGGTATGCTGAAGCTGCTGCAAACGCAGAACGTTGGGCGTCTCTATGTGTTTATGATCACAGCCAAAATTCTGACAGAGTTCTTGATGGAATACAATGTGGTGAAAATATATACAAGTCAAGTAATCCCAGGGCATGGACTGAAATAATGCAGTCTTGGTATGATGAATACAAAAATTTTGACTTTGGCTATGGAGCAAACCCACCAGGTTCTGTTATTGGCCATTATACT…	MIVLLSLAAVLQQSFGLVDFNSESPRRPEVQRVIVDTHNSYRRSVSPTASNMLRMEWYAEAAANAERWASLCVYDHSQNSDRVLDGIQCGENIYKSSNPRAWTEIMQSWYDEYKNFDFGYGANPPGSVIGHYTQIVWYKSYRIGCAAYYCPSSLYNYFYVCQYCPAGNMAGKTATPYNSGPTCGDCPSACDNGLCTNPCKRENMYTNCNELVQQNSCQGDWMKSYCPATCFCKNKII	RecName: Full=Cysteine-rich venom protein; Short=CRVP; AltName: Full=CRISP-PHI1; AltName: Full=CRISP-PHI2; AltName: Full=Cysteine-rich secretory protein; Flags: Precursor [Philodryas olfersii]	Q09GJ9.1	91.56
Phospholipase A2 inhibitor (iPLA)	SB0307_PNATiPLA001	Putative percursor of snake venom phospholipase A2 inhibitor	ATGAAGCATCTTCTTATTTTCACTGCTTTGATAATTACAGCAACTGATGCTCAACTGACCTGCACATGTTCTGCGCCAACGACTGGACCAACGTGCGGCGAGGCAAATACTTGTACTATCCCAAAGGGTCAATGTTATTCAATTCAGAGGCAAATTATTATCGAGAAAGATAAGCCAGTCAAAGCAGCAAATAAAGGTTGCCAGGAAGAAAAAGATCCTAATGTCTGCAATGACAAAGGGGTTGTGTTCATTTCGACCGAAAATGTTTTTTATCTGCTGAGCAATGTTACATGCTGTGACAAAAATGATTGCAACAAAGATGACGTTGTAGATGTTTCAAAGCTTAACAATACTCTTTCCAGCAAAAAGCTGGTTTGCCCATCATGCTTTAATTTGGGT…	MKHLLIFTALIITATDAQLTCTCSAPTTGPTCGEANTCTIPKGQCYSIQRQIIIEKDKPVKAANKGCQEEKDPNVCNDKGVVFISTENVFYLLSNVTCCDKNDCNKDDVVDVSKLNNTLSSKKLVCPSCFNLGKKTCDGTEQMNCREGQDKCFTIIGTISKGETEPKDFAAKGCAAQSAILKNGTTLTFGDASYKLNTVNLVEAKSGVSQISSCLSFAILLPSVLWFLLDSSLY	phospholipase A2 inhibitor and Ly6/PLAUR domain-containing protein-like [Pseudonaja textilis]	XP_026571254.1	62.34
Phospholipase B (PLB)	SB0307_PNATPLB001	Putative percursor of snake venom Phospholipase B	ATGGTCCGCTACGGCATCGCCTCCTCCTCGGACAATCGCCGCCTGCGATGCTGGAGCTGGTACTGGGGGGGACTTTTACTTCTCTGGGCCGTGGCAGGAACTCGAGCAGATCTCCACTATGCTACTGTATATTGGTTGGAAGCTGAAAAATCTTTCCAAGTTAGGGATGTATTAGACAAGAATGGCGATGCTTATGGTTATTACAATGACACTGTACAATCTACTGGATGGGGGATACTTGAGATCAAAGCAGGCTACGGTAATCAGCCCGTAAACAATGAAATACTCATGTACGCTGCAGGTTTCTTGGAAGGCTACCTCACTGCTTCACGTATGAGTGACCATGTTGCAAATCTATATCATCAGCTGATTAAGAATGTCATCATTGAACAAAAAGTA…	MVRYGIASSSDNRRLRCWSWYWGGLLLLWAVAGTRADLHYATVYWLEAEKSFQVRDVLDKNGDAYGYYNDTVQSTGWGILEIKAGYGNQPVNNEILMYAAGFLEGYLTASRMSDHVANLYHQLIKNVIIEQKVKDFMKKQDEWTRQQIKNNKDDPFWRNAGYIIAQLDGLYMGNVEWAKRQKRTPLTDFEISFLNAIGDLLDLIPALISDSRTNDFLSLREISRMYQWDMGHCSALIKVLPGYENIYFAHSSWFTYAATLRIYKHWDFRIIDPQTKTGRASFSSYPGFLVSLDDFYILGSGMIMLQTTNSVFNLSLLKQVVPESLFAWERVRIANMMADSGKSWAQTFEKENSGTYNNQYMILDTKKIKLQRSIDDGTLYIIEQVPNLVKYSDQTDILR…	phospholipase B-like 1 [Pantherophis guttatus]	XP_034259424.1	94.21
Snake Venom Acid Lipase (SVLIPA)	SB0307_PNATSVLIPA001	Putative percursor of snake venom Acid Lipase	ATGTGGCTGCTAATAATTGCAGTGAGCTTGTTCCAAGGCCTGGTAAATTCATCAGTGCTTGAGAGAAGAAAAAGAAGTGTGAATCCAGAAACCTCCATGAACATTAGTGAAATTATTTTATTCAGAGGATATCCCAGTGAGGAATATGAGGTGGTGACAGATGATGGATATTTCCTAAGTATTAATAGAATTCCTTATGGAAAAATAAGTCAGAAAACCAAGGAACGGAGACCAGCTGTGTTTCTGCAACATGGCTTCCTTGCTGATGGCAGTAACTGGGTGACCAATCTAGACTACAACAGCCTGGGTTTTGTGCTGGCTGACGCTGGTTTTGATGTTTGGTTAGGGAACAGCAGAGGAAACACTTGGTCCCGAAAACACATCAACTATACCACAAAG…	MWLLIIAVSLFQGLVNSSVLERRKRSVNPETSMNISEIILFRGYPSEEYEVVTDDGYFLSINRIPYGKISQKTKERRPAVFLQHGFLADGSNWVTNLDYNSLGFVLADAGFDVWLGNSRGNTWSRKHINYTTKQKEFWMFSFDEMAKYDLPASINFVLNKTGQEQLFYVGHSQGTIIGFIAFAAFPELAKKINIFFGLAPAMTAMFSSGPLAKLGELPELLIKEIFGTKEFFPQNALIKWLATKVCSRVLLDDLCGNVFFLVCGFNEKNLNMSRVDVYTTHCPAGTSVQNMLHFSQVVKSGEMRAFDWGSRKENMAHYNQSTPPPYKMKGMLVRTAIWTGGHDILADKKDVAVLMTMIPNLIYHKEIPDWEHLDFIWGLDAPQRMFRDMIEMMRKAHYAH	putative lysosomal acid lipase/cholesteryl ester hydrolase [Pseudonaja textilis]	XP_026566277.1	89.00
Snake venom Endogenous Matrix-Metalloproteinase 9 (seMMP-9)	SB0307_PNATSeMMP003	Putative percursor of snake venom endogenous matrix-metalloproteinase-9	ATGAGACGCCCAGTCCCGGCCTCCCTCCTCCTCCTGGCGCTCCTGCCGCTGCCCTGTCCGTGGGCCGCCCCGACCGAAGGGAAGGGCCCCCTAGTCATCACCTTCCCCGGGGACGCCGTCAGCCACCTGACGGACCGGGAGCTGGCCGCCCGCTACCTCCAGCGTTACGGGTACCTGACGACGACCAACCCCGGGGGGCAGGTGAAGCTGGAGACCCCCCTCAAGGCCATGCAGAAACGGCTGGGCTTGCCGGAAACGGGGGAGCTGGACGCCCCCACCCTCACGGCCATGCGAGCGCCCCGCTGCGGAGTCCCGGACGTGGGTCGCTTCCAGACCTTCGAGGGCGACCTCAAGTGGGACCACACGGACCTCACTTACCGGGTGGTCAACCATACCCCT…	MRRPVPASLLLLALLPLPCPWAAPTEGKGPLVITFPGDAVSHLTDRELAARYLQRYGYLTTTNPGGQVKLETPLKAMQKRLGLPETGELDAPTLTAMRAPRCGVPDVGRFQTFEGDLKWDHTDLTYRVVNHTPDLDASIIEDAFARAFKVWSEVTPLTFTQRQEGEVDILIQFGTREHGDGYPFDGKDELLAHAFPPGKDRFSGDVHFDDDEFWTLGTGIVVKTHFGNANGAVCHFPFIFEGKSYSSCTTEGREDGLPWCATTPDYDQDKKYGFCPSELLFTYDGNSDGEKCVFPFVFEGKSYQGCTTDGRTDGYRWCATTANFDEDKKYGFCPNRDTAVIGGNSQGEPCSFPFKFLGQTYSSCTTEGRTDGKLWCATTSDYDADKKWGLCPDQGYSLF…	matrix metalloproteinase-9 [Pantherophis guttatus]	XP_034280049.1	88.23
	SB0307_PNATSeMMP001	Putative percursor of snake venom endogenous matrix-metalloproteinase-9	ATGAGACGCCCAGTCCCGGCCTCCCTCCTCCTCCTGGCGCTCCTGCCGCTGCCCTGTCCGTGGGCCGCCCCGACCGAAGGGAAGGGCCCCCTAGTCATCACCTTCCCCGGGGACGCCGTCAGCCACCTGACGGACCGGGAGCTGGCCGCCCGCTACCTCCAGCGTTACGGGTACCTGACGACGACCAACCCCGGGGGGCAGGTGAAGCTGGAGACCCCCCTCAAGGCCATGCAGAAACGGCTGGGCTTGCCGGAAACGGGGGAGCTGGACGCCCCCACCCTCACGGCCATGCGAGCGCCCCGCTGCGGAGTCCCGGACGTGGGTCGCTTCCAGACCTTCGAGGGCGACCTCAAGTGGGACCACACGGACCTCACTTACCGGGTGGTCAACCATACCCCT…	MRRPVPASLLLLALLPLPCPWAAPTEGKGPLVITFPGDAVSHLTDRELAARYLQRYGYLTTTNPGGQVKLETPLKAMQKRLGLPETGELDAPTLTAMRAPRCGVPDVGRFQTFEGDLKWDHTDLTYRVVNHTPDLDASIIEDAFARAFKVWSEVTPLTFTQRQEGEVDILIQFGTREHGDGYPFDGKDELLAHAFPPGKDRFSGDVHFDDDEFWTLGTGIVVKTHFGNANGAVCHFPFIFEGKSYSSCTTEGREDGLPWCATTPDYDQDKKYGFCPSELLFTYDGNSDGEKCVFPFVFEGKSYQGCTTDGRTDGYRWCATTANFDEDKKYGFCPNRDTAVIGGNSQGEPCSFPFKFLGQTYSSCTTEGRTDGKLWCATTSDYDADKKWGLCPDQGYSLF…	matrix metalloproteinase-9 [Pantherophis guttatus]	XP_034280049.1	88.38
Snake Venom Metalloproteinase P-III Class (SVMP P-III)	SB0307_PNATSVMP007	Putative percursor of snake venom metalloproteinase P-III Class	ATGATCCAAGCTCTCTTGGTAACTATATGCTTAGCGGTTTTTCCATATCAAGGGAGTTCTATAATCCTGGAATCCGGGAATGTTAATGATTATGAAGTAGTATATCCACAAAAAGTGCCTGTATTGCCCAAAGGAGGACTTCAGAATGCTGAGCCAGAGACCAAGTATGAAGATACAATGCAATTTGAATTTCAAGTGAATGGAGAGCCAGTGGTCCTTCACCTAAAAAGAAATAAAGGACTTTTTTCAAAAGATTACAGTGAAACTCATTATTCCCCTGATGGCAGAGAAATTACAACCACCCCTCCAGTTCAGGAACACTGCTATTATCATGGACACATTCAGAATGAAGCTGACTCAACTGCAGTCATCAGTGCATGTGACGGCGTGAAAGGACAT…	MIQALLVTICLAVFPYQGSSIILESGNVNDYEVVYPQKVPVLPKGGLQNAEPETKYEDTMQFEFQVNGEPVVLHLKRNKGLFSKDYSETHYSPDGREITTTPPVQEHCYYHGHIQNEADSTAVISACDGVKGHFKHQGETYFIEPLKLSNSEAHAVYKYENVEKEDETHKTCGVTQTTWESDEPIEKSPQLVVTPEQLRYLQAPKYIELCIVVDNVMFRKYTGNYTVIRTRVYEIVNTLNMIYRSLNIHVALTGVEFWSNQDQINVQADASVTLDLFGEWRKTNLLPRRRNDNAQLLTGINFNGPTLGLGYVGTLCKPKFSSAIVMDHNKMAVFIASAMAHEMGHNLGINHDRNSCICGSNSCIMSPTLSFEPLYRFSNCSYQEHQSYLIRALPQCILN…	snake venom metalloproteinase 24, partial [Borikenophis portoricensis]	AXL96574.1	76.91
	SB0307_PNATSVMPIII006	Putative percursor of snake venom metalloproteinase P-III Class	ATGACCCAAGCTCTCTTGGTTACTATATGTTTAGCGGTTTTTCCATATCAAGGGAGCTCTATAAAACTGGAATCCGGGAATGTTAATGATTATGAAGTAGTGTATCCACAAAAAGTGCCTGTATTGCCCAAAGGAGGACTTCAGAATGCTGAACCAGAGAAATTTCTCTGCCATCAGGGGAATAATGAATTTCAAGTGAATGGAGAGCCAGTGGTCCTTCATCTAGAAAGAAATAAAGGACTTTTTTCAGAAGATTACAGTGAAACTCATTATTCCCCTGATGGCAGAGAAATTACAACCACCCCTCCAGTTCAGGATCACTGCTATTATCATGGACACATCCAGAATGAAGCTGACTCAACTGCAGTCATCAGTGCATGTGATGGCTTGAAAGGACAT…	MTQALLVTICLAVFPYQGSSIKLESGNVNDYEVVYPQKVPVLPKGGLQNAEPEKFLCHQGNNEFQVNGEPVVLHLERNKGLFSEDYSETHYSPDGREITTTPPVQDHCYYHGHIQNEADSTAVISACDGLKGHFKHQGETYFIEPLKLSNSEAHAVYKYDSLEKEDETHKTCGVTQTTWESDEPIEKISQVSITPEEQNAYLDAKKYIEFFIVVDNGMFRKYSSNLTAIRTRVYEIVNIVNTIYRALNIHVALIGLEIWSFRDKINVQSASNVTLDLFGEWRKTHLLPRNSNDNAQLITSIDFDGPTVGLGYVGTLCRLKHSSAIVQDHSDLTSIMASTMAHEMGHNLGINHDTNGCQCSSNACVMSPTIGSVPYYQFSSCSIQEHRRYLIRAIPQCIL…	venom metalloprotease precursor [Philodryas chamissonis]	AJB84503.1	91.98
	SB0307_PNATSVMPIII005	Putative percursor of snake venom metalloproteinase P-III Class	ATGATCCAAGCTCTCTTGGTAACTATATGCTTAGCGGTTTTTCCATATCAAGGGAGTTCTATAATCCTGGAATCCGGGAATGTTAATGATTATGAAGTAGTATATCCACAAAAAGTGCCTGTATTGCCCAAAGGAGGACTTCAGAATGCTGAGCCAGAGACCAAGTATGAAGATACAATGCAATTTGAATTTCAAGTGAATGGAGAGCCAGTGGTCCTTCACCTAAAAAGAAATAAAGGACTTTTTTCAAAAGATTACAGTGAAACTCATTATTCCCCTGATGGCAGAGAAATTACAACCACCCCTCCAGTTCAGGAACACTGCTATTATCATGGACACATTCAGAATGAAGCTGACTCAACTGCAGTCATCAGTGCATGTGACGGCGTGAAAGGACAT…	MIQALLVTICLAVFPYQGSSIILESGNVNDYEVVYPQKVPVLPKGGLQNAEPETKYEDTMQFEFQVNGEPVVLHLKRNKGLFSKDYSETHYSPDGREITTTPPVQEHCYYHGHIQNEADSTAVISACDGVKGHFKHQGETYFIEPLKLSNSEAHAVYKYENVEKEDETHKTCGVTQTTWESDEPIEKSPQLVVTPEQLRYLQAPKYIELCIVVDNVMFRKYTGNYTVIRTRVYEIVNTLNMIYRSLNIHVALTGVEFWSNQDQINVQADASVTLDLFGEWRKTNLLPRRRNDNAQLLTGINFNGPTLGLGYVGTLCKPKFSSAIVMDHNKMAVFIASAMAHEMGHNLGINHDRNSCICGSNSCIMSPTLSFEPLYRFSNCSYQEHQSYLIRALPQCILN…	snake venom metalloproteinase 24, partial [Borikenophis portoricensis]	AXL96574.1	76.91
	SB0307_PNATSVMPIII004	Putative percursor of snake venom metalloproteinase P-III Class	ATGATCCAAGCTCTCTTGGTAACTATAAGCTTAGTGGTTTTTCCATGTCAAGGGAACTCGATAAAACTGGAATCCGGGAATGTTAATGATTATGAAGTAGTGTATCCACAAAAAGTGCCTGTATTGCCCAAAGGAGGACTTCAGAATGCTGAGCCAGAGACTGAGTATGAAGATGCAATGCAATATGAATTTCAAGTGAATGGAGAGCCAGTGGTCCTTCATCTAGAAAGAAATAAAGGACTTTTTTCAGAAGATTACAGTGAAACTCATTATTCCCCTGATGGCAGAGAAATTACAACCACCCCTCCAGTTCAGGATCACTGCTATTATCATGGACACATCCAGAATGAAGCTGACTCAACTGCAGTCATCAGTGCATGTGATGGCTTGAAAGGACAT…	MIQALLVTISLVVFPCQGNSIKLESGNVNDYEVVYPQKVPVLPKGGLQNAEPETEYEDAMQYEFQVNGEPVVLHLERNKGLFSEDYSETHYSPDGREITTTPPVQDHCYYHGHIQNEADSTAVISACDGLKGHFKHQGETYFIEPLKLSNSEAHAVYKYDSLEKEDETHKTCGVTQTTWESDEPIEKISQVSITPEEQNAYLDAKKYIEFFIVVDNGMFRKYSSNLTAIRTRVYEIVNIVNTIYRALNIHVALIGLEIWSFRDKINVQSASNVTLDLFGEWRKTHLLPRNSNDNAQLITSIDFDGPTVGLGYVGTLCRLKHSSAIVQDHSDLTSIMASTMAHEMGHNLGINHDTNGCQCSSNACVMSPTIGSVPYYQFSSCSIQEHRRYLIRAIPQCIL…	venom metalloprotease precursor [Philodryas chamissonis]	AJB84503.1	93.94
	SB0307_PNATSVMPIII002	Putative percursor of snake venom metalloproteinase P-III Class	ATGATCCAAGTTCTCTTGATTACTATATACTTAGTGGTTTTTCCATATCAAGGGAGCTCTATAATCCTGGAATCCGGGAATGTTAATGATTATGAAGTAGTATATCCACAAAAAACGCCTATATGGCCCAGAGGAGGACTTCAGAATGCTGAGCCAGAGACCGAGTATGAAGATACAATGCAATATGAATTTCAAGTGAATGGAGAGCCAGTGGTCCTTCGCCTAGAAAGAAATAAAGGACTTTTTTCAGAAGATTACAGTGAAACTCATTATTCCCCTGATGGCAGAGAAATTACAACCACCCCTCCAGTTCAGAATCATTGCTATTATCATGGACACATCCAGAATGAAGCTGACTCAACTGCAGTCATCAGTGCATGTGACGGCTTGAAAGGACAT…	MIQVLLITIYLVVFPYQGSSIILESGNVNDYEVVYPQKTPIWPRGGLQNAEPETEYEDTMQYEFQVNGEPVVLRLERNKGLFSEDYSETHYSPDGREITTTPPVQNHCYYHGHIQNEADSTAVISACDGLKGHFKYQGETYFIEPLKLSNSEAHAVYKYDSLEKEDETHKTCGVTQTTWELDQPIEKISQVSITPEEQNTYLDAKKYIEFFIVVDNGMFRKYSSNLTAIRTRVYEIVNTLNTIYRPLNIHVALIGIEFWSNRDKINVQTAANVTLDLFGTWRETDLLPRRRNDNAQLITSIDFNGSTVGLGYVGTFCRPKHSSAIVQDHSDLTSIMASTMAHEMGHNLGINHDTNACHCSSNACVMSPEIGNVPHYQFSSCSIQEHRRYLTRAQPQCIL…	snake venom metalloprotease [Philodryas olfersii]	ACS74988.1	91.06
	SB0307_PNATSVMPIII001	Putative percursor of snake venom metalloproteinase P-III Class	ATGACCCAAGCTCTCTTGGTTACTATATGTTTAGCGGTTTTTCCATATCAAGGGAGCTCTATAAAACTGGAATCCGGGAATGTTAATGATTATGAAGTAGTGTATCCACAAAAAGTGCCTGTATTGCCCAAAGGAGGACTTCAGAATGCTGAACCAGAGACCAAGTATGAAGATGCAATACAATATGAATTTCAAGTGAATGGAGAGCCAGTGGTCCTTCACCTAGAAAGAAATAAAGGACTTTTTTCAGAAGATTACAGTGAAACTCATTATTCCCCTGATGGCAGAAAAATTACAACAAGCCCTCCTGTTCAGGATCACTGCTATTATCATGGACACATCCAGAATGAAGCTGACTCAACTGCAGTCATCAGTGCATGCAATGGTTTGAAAGGACAT…	MTQALLVTICLAVFPYQGSSIKLESGNVNDYEVVYPQKVPVLPKGGLQNAEPETKYEDAIQYEFQVNGEPVVLHLERNKGLFSEDYSETHYSPDGRKITTSPPVQDHCYYHGHIQNEADSTAVISACNGLKGHFKHQGETYFIEPLKLSNSEAHAVYKYDSLEKEDETHKTCGVTQTTWELDEPIEKISQVSITPEEQNTYLDAQKYIEFFIVVDNRMFRKYSRNFTVISRRVYEIVNTLNTIYRALKIHVALIGLEIWSNGDQIKMQTNSTETLKLFGEWREKDLIPRKRNDYAQLITDIYFDEATLGEAYIGSLCQSRKSVAVVMDHTHRTSIMASTMSHELGHNLGIRHDRKFCSCNLNRCIMSPSVSYQPSIWFSNCSIQDHRRYLIRRHPQCIL…	venom metalloprotease precursor [Philodryas chamissonis]	AJB84503.1	77.07
Snake Venom Serinoproteinase (SVSP)	SB0307_PNATSVSP002	Putative percursor of snake venom serinoproteinase	ATGGCACTGATCGGAGTGCTAGCAAGCCTTCTGATCCTACAGTTTTCTTACGAGTCTGGCTATGATGAATTCCGAAGAAGCAGCTGGGGCAACAGTACGGTAAACACCACTGCCAAAGAGTCTGGCTATGATGAAACCCGAAGAAGCAGCTGGGACAGCAGTATGGTAAATACCACTCCCATAGAAATAAACCCTCCTGTTGAAGTGGTAGGAGGTTTTGAATGTTCTGGAAGAGAACATCGTTCCCTTGTACTCTTATATAACTCTGCAGGGTTTTTCTGCTCTGGGACCTTGATTAACCACGAATGGGTGCTCACCGCTGCACACTGCAACAGGGAAAATATCCAGATAAAGCTTGGTGTGCATAACATACATATACACAATGAGGAAGAGCAGATA…	MALIGVLASLLILQFSYESGYDEFRRSSWGNSTVNTTAKESGYDETRRSSWDSSMVNTTPIEINPPVEVVGGFECSGREHRSLVLLYNSAGFFCSGTLINHEWVLTAAHCNRENIQIKLGVHNIHIHNEEEQIRVPKEKVCCLGTKNCTQWNQDIMLIRLNSSVNNSEYIAPISLPSNPPIMGSDCQVMGWGTITSPEVTYPEVPHCVIIQILHNEVCQAAYPILSGKSNILCAGKLEGGKDSCKGDSGGPLICNGQIQGIVSWGRFPCARVLDPGVYTKVFDYIDWIQGIMAGNASVICP	serine protease precursor [Philodryas chamissonis]	AJB84504.1	75.75
	SB0307_PNATSVSP001	Putative percursor of snake venom serinoproteinase	ATGGCGCTGATCGGCGTGCTAGCAAACCTTCTGATACTATGCCTTTCTTACGCAAGAACCCCTCCTGATCGGATCATTGGAGGCTTGGAATGTAACCAAAATGAACATCGTTCCCTTGTACTCTTATATAACTCTGCTGGGTTTTTCTGCTCTGGGACCTTGATTAACCACGAATGGGTGCTCACCGCTGCACACTGCAACAGTGAAAATTTCCAGATAAAGCTTGGTGTGCATAACATACATGTACCCAATGAGGATGAGCAGACAAGAGTCCCAAAGGAGAAGTTGTGTTGTCTCAGTACCAAGAACTGTACCCAATGGAATCAAGACATCATGTTGATCAGGCTGAACAGTTCTGTTAACAATAGTCCACACATCGCACCGCTCAGCTTGCCCTCC…	MALIGVLANLLILCLSYARTPPDRIIGGLECNQNEHRSLVLLYNSAGFFCSGTLINHEWVLTAAHCNSENFQIKLGVHNIHVPNEDEQTRVPKEKLCCLSTKNCTQWNQDIMLIRLNSSVNNSPHIAPLSLPSNPPSVGSDCRVMGWGTITSPEVTYPGVPHCVNIQIFHNEVCEASYPNLSGNSNILCAGELEGGKDSCKGDSGGPLICNGQIQGIVSWGHFHCGQVLEPGVYTKVFDYIDWIQGIMAGNANVICPNENFSE	RecName: Full=Snake venom serine protease; Short=SVSP; Flags: Precursor [Philodryas olfersii]	Q09GK1.1	89.27
Waprin Protein (WAP)	SB0307_PNATWAP002	Putative percursor of snake venom Waprin protein	ATGACGCTCAGGAGAGGCAGCTGCCCCCTCCTCCTCTTCTCCCTGGTGGGTCTCCTCACGACCTGTGCTCAGGAGCCTGACGCGGCTGGACAGAACACCACAGTGGCCGCAGAGAAAGCTGGCACCTGTCCCCAGGCAGAGTTGGAGATGCCCAACAGGAACTGCACGGAGGGATGCCAGTCCGATGCCGGCTGCGAGGGGAACAAGAAGTGCTGCCGGACAGGATGTGGGACTTCCTGCCAAATCCCAGACGAGAAACCCGGGTCCTGCCCAAATGTGGACGTGCCCATCCCACCTCTGGGTCTTTGCCAAACCACGTGTAGTATGGATTCAGACTGTTCAGGGACGAAGAAATGCTGCAAAAATGGCTGCGGGTTTATGACTTGTACAACGGCCAGG…	MTLRRGSCPLLLFSLVGLLTTCAQEPDAAGQNTTVAAEKAGTCPQAELEMPNRNCTEGCQSDAGCEGNKKCCRTGCGTSCQIPDEKPGSCPNVDVPIPPLGLCQTTCSMDSDCSGTKKCCKNGCGFMTCTTARP	RecName: Full=Waprin-Phi1; Flags: Precursor [Philodryas olfersii]	A7X4K1.1	93.28
	SB0307_PNATWAP001	Putative percursor of snake venom Waprin protein	ATGAAACCTTGGATTCTACTTCTCCTAGCTGGTCTCCTCATTCTTTCAACTCAACAGACATCGGCAAAGCCCAAAAGAAGTCATTACGAAATAGTCAAACCGGGTGAGTGTCCCATGTTCAAAATCTCTCCTGACCATCCATGTGACCAAAACTGTCAGTGGGACTCTAACTGCGAAGGGAATATGAAATGCTGCCCGGTGGGATGTGCCAGGGTCTGTTTCCCCCCAGGACCACTCTGA	MKPWILLLLAGLLILSTQQTSAKPKRSHYEIVKPGECPMFKISPDHPCDQNCQWDSNCEGNMKCCPVGCARVCFPPGPL	waprin-Phi3-like isoform X2 [Pseudonaja textilis]	XP_026579255.1	67.61

## Sheet: P. MATTOGROSSENSIS
Table S2. Identification and annotation of transcripts of putative toxins from the venom glands of Philodryadini snakes.
Philodryas mattogrossensis
Toxin group	Sequence code	Annotation	Nucleotide sequence	Amino acid sequence	BLAST identification	Accession number	Identity %
C-type Lectin (CTL)	SB1881_PMATCTL001	Putative percursor of snake venom C-type lectin	ATGGGGCGATTCATCTTTGTGAACCTGGGCTTGCTGGTCGTGGCTTTCTCCCTAAGGGGATCTGAAGCATGTTGTCCCTGCGGTTGGTCCTCCTATGATAAGTATTGCTACAAGGTCTTCGATAAACGCAAGAATTGGGACGATGCCGAGAGGTTCTGCATGGAGCAGGGGAAAGGAGGCCATCTGGCCTCTCTCGGAAGCCTTGAAGAGGGAAAATTTGTCAGCAAACTCACCTTTAAAAAATTGAAGGAACACCCGACCTATGTCTGGATCGGACTGAGGGCTCAAGGCCAAGGACAGCAATGCAGCTCGAGGTGGAGTGATGGCTCCAGGATCCTTTATGAAAACTGGCATCCATTACAATCCAGAAAATGTATTGCGTTGTCAAAATGGACGGAG…	MGRFIFVNLGLLVVAFSLRGSEACCPCGWSSYDKYCYKVFDKRKNWDDAERFCMEQGKGGHLASLGSLEEGKFVSKLTFKKLKEHPTYVWIGLRAQGQGQQCSSRWSDGSRILYENWHPLQSRKCIALSKWTEYLKWYNHICDFTLPFICKFLAEPDDPE	RecName: Full=Snaclec subunit A; AltName: Full=C-type lectin subunit A; Flags: Precursor [Philodryas olfersii]	Q09GJ8.1	96.88
	SB1881_PMATCTL002	Putative percursor of snake venom C-type lectin	ATGGGGAGATTCATCTTTGTGAACCTGGGCTTGCTGGTTGTGGTTTTCTCCCTAAGGGGATCTGGAGCAGATTGTCCCTCTGGTTGGTCCTCCTATGATAAGTATTGTTACAAGGTCTTTGATGAACTCAAGAATTGGGACGAAGCAGAGAGGTTCTGCATGGAGCAGAAGACGGGCAGCCATCTGGCCTCCATCCTTAGCAGTGAAGAAGGATCTTATGTGGCCAATCTGGCCTTCAAACGTGTGAAGCATCCTTCGATGTGGATCGGACTGAGTAATATATGGAATCAATGTAGCTGGCAGTGGAGTGATGGCTCCAGCCTCGGTTACGAAGCCTGGGTTGAAGGACCCGATTGTGTTATGATGCGTTTACAGCCAGGTTTTATCGAGTGGTACAGT…	MGRFIFVNLGLLVVVFSLRGSGADCPSGWSSYDKYCYKVFDELKNWDEAERFCMEQKTGSHLASILSSEEGSYVANLAFKRVKHPSMWIGLSNIWNQCSWQWSDGSSLGYEAWVEGPDCVMMRLQPGFIEWYSVECKSTLPFTCKFLAKREDPASE	c-type lectin-like protein precursor beta subunit [Philodryas chamissonis]	AJB84507.1	96.79
	SB1881_PMATCTL003	Putative percursor of snake venom C-type lectin	ATGGGGCGATTCATCCTTCTGACCCTCGGCTTGCTGGTCGTGGCTTTCTCTCTTAATGGAATTGGAGCTGATCACCCTTGCCCCACGGGCTGGTCCTCCTTTGAGCACTTTTGCTACAAGCTCTTCAAACGACGGGAGACCTGGCAAGAAGCAGAGACGTTATGCGTCCAAAGGCAGAATGGCAGCCATCTCACCTCCATCCAAAGCTGGAGAGAGTCAGCTTACATGGCCAGGCTGGTTTCCAGAAATATGCCCTTCTCCGATGTCTGGATCGGACTGAAGGATTCAGAGACAAATGGCACCTGGGAATGGAGTGATGGCTCCAACATCAGTTACACATCCTGGCAAATAAGGCAACCTAACAATGGTGATGATAAGGAGTACTGCGTCGTGCTATCC…	MGRFILLTLGLLVVAFSLNGIGADHPCPTGWSSFEHFCYKLFKRRETWQEAETLCVQRQNGSHLTSIQSWRESAYMARLVSRNMPFSDVWIGLKDSETNGTWEWSDGSNISYTSWQIRQPNNGDDKEYCVVLSRWSAYLGWKVVNCESRSFFVCKFQPKSDGST	C-type lectin lectoxin-Lei1-like [Thamnophis elegans]	XP_032094206.1	58.39
	SB1881_PMATCTL004	Putative percursor of snake venom C-type lectin	ATGGGGCGATTCATCTTTATGAGTCTCGGCTTGCTGGTTCTGGCTTTTTCCCTGAGTGGAATTGGAGCCGATCAACGTTGTCCCTCTGGTTGGTCCTCCCACAATGTGTCTTGCTACAAGTTCTTCGACGACTGGATGACCTGGGACGAAGCGCAGAGGTTCTGCATGGACGAGCAGGAAAACGGCCAACTCGCCTCCATCAAAGATCTAGAAGAGGCAGTGAAGTTGTCCTACCTGATCTCCAAAGCAAGGAGTATTTTTGATGTCTGGATTGGGCTGAGGTTTTCAAAGAGAAAAAGCATCTGGGAGTGGAGTGATGGCTCCAGTGTGACCCAGACACGCTGGGAAGAAGGAAAACCCAACAACGTTTTGAAGAAGGAGTTCTGTACTATACTGACA…	MGRFIFMSLGLLVLAFSLSGIGADQRCPSGWSSHNVSCYKFFDDWMTWDEAQRFCMDEQENGQLASIKDLEEAVKLSYLISKARSIFDVWIGLRFSKRKSIWEWSDGSSVTQTRWEEGKPNNVLKKEFCTILTSRSHYLKWNNMKCRDWHPFICKFQPRKEASGC	RecName: Full=C-type lectin lectoxin-Phi1; Short=CTL; Flags: Precursor [Philodryas olfersii]	A7X406.1	79.49
	SB1881_PMATCTL005	Putative percursor of snake venom C-type lectin	ATGGGATTCTTCTTGTACATTGGCCTCTGTTGTCTCGGAAGCTTGATCATCAATCCTTTTTTGGGAGCTAAGGCTGCATCATGCCCCAGGGACTGGTTGAAGAAACAAGGGAACTGCTATGGATATTTTGATGAAAAACTAAATTGGGATGATGCTGAGCTTGAGTGCCAGAGCTATGGCCCTGGATGTCATCTTGCCTCTATCCTCAGCGCCCAAGAGGCTGCACTAGTGTCTGTATACGTCAGAGACAAACAGGGAACACTTAGCAATGTCTGGATGGGACTCTATGATATCACTGGGAAAAGGCGATGGAGATGGGCTGATGAATCCACCTTCAACTACAAAGCCTGGATGGTACACCAGCCAGACAACGTTAATGGGAATGAAAACTGTGCGGAG…	MGFFLYIGLCCLGSLIINPFLGAKAASCPRDWLKKQGNCYGYFDEKLNWDDAELECQSYGPGCHLASILSAQEAALVSVYVRDKQGTLSNVWMGLYDITGKRRWRWADESTFNYKAWMVHQPDNVNGNENCAELTCSSGFKTWNDRSCSSPNPYICKYQL	C-type lectin 6, partial [Borikenophis portoricensis]	AXL96590.1	86.25
	SB1881_PMATCTL006	Putative percursor of snake venom C-type lectin	ATGCTTCTCATCACGTCCTTCATCTTTGGTCTCTTGGGCAGCCTTACCTGGGCAGGTCCACGTGGTCGGACTGTCTGTCCTTCGGGCACCTTTGCCTATAAAGACGGAAGCGAGTGGAATTGCTACAAGTTCTATGAAGATCGGTTCAACTTTGACGATGCTGAGGAAGAGTGTCAGTTCAAATGGAAAGGTCATTTAGCATCTTTCAGATCATACAAGCAGGCAAAATCCATTGGTGCCTATGTCACTAAAGAAAACAGAGAGAGTGATTATGTCTGGATTGGGCTCCAACGAGATATAAATTCTACTTTGGCTAATGGATGGCGCTGGAAGGATGGATCGCGATCCAAGTTTGCCAGGTGGAGCATTGGTGAACCCAACAAGCTGATTTGCAATGCG…	MLLITSFIFGLLGSLTWAGPRGRTVCPSGTFAYKDGSEWNCYKFYEDRFNFDDAEEECQFKWKGHLASFRSYKQAKSIGAYVTKENRESDYVWIGLQRDINSTLANGWRWKDGSRSKFARWSIGEPNKLICNAACVALYPPSGHLTWSDLDCIRELPFLCKWKPT	C-type lectin 3, partial [Spilotes sulphureus]	AXL95269.1	77.58
	SB1881_PMATCTL007	Putative percursor of snake venom C-type lectin	ATGGGACATCAGACCTTCTGGGGATTCTGCCTCTTGGCCTGCGTGGCGGTGACCTCCTTGGTGGAAGGCTTCCTGGATCGAGCCAAGTGTCCTGAAGAAGCCATTTATTATCGACAGCGATGCTTTCAACCAGTATATAGGTCCCTCTCCTGGGACGAGGCAGAGATTGAGTGCCAGCACCTGAAGAGTGGAGGCCACCTGGCCACTTTTCGGACTGCTGCTGAGGAAAAAATTGTCTCCTCCCACATCAGGCGCTCCAGCACTGCCACAGATGTCTGGATTGGGATGCATGCAGTGCAAACACCCATGAAACTCATCTGGCAATGGATTGATGGAACCACCTACACCCCAGGAAGCCTCCTCTGGGACAGCAGAGCCCCCAGCACCACAATTTCCAGC…	MGHQTFWGFCLLACVAVTSLVEGFLDRAKCPEEAIYYRQRCFQPVYRSLSWDEAEIECQHLKSGGHLATFRTAAEEKIVSSHIRRSSTATDVWIGMHAVQTPMKLIWQWIDGTTYTPGSLLWDSRAPSTTISSAQCVSLSNIHSPGTSARWIQRTCHTTLPFICKYRASA	putative C-type lectin protein [Naja naja]	KAG8138547.1	77.51
	SB1881_PMATCTL009	Putative percursor of snake venom C-type lectin	ATGGGGCGATTCATCTTTGTGAGTCTCGGCTTGCTGGTTCTGGCTTTTTCCCTGAGTGGAATTGGAGCCGATCAACATTGTCCCTTTGGTTGGTTCTCCCACAATGTGTCTTGCTACAAGCTCATCAACGATTGGAAGACCTGGGATGAAGCGCAGAGGTTCTGCATGGAAGAGCAGGAAAATGCCCAACTCGCCTCCATCAACGATGTGGGAGAGTCAGTGAAGTTGTCCGATGAGATCTCCAAAACATGGAGTATTATTGATGTCTGGATTGGATTGAGGCTTTCAAAGAGAAAAGGTATCTGGGAGTGGAGTGATGGCTCCAACATGACCCAGACACGCTGGGAAGAAGGAGAACCCAACAACTTTTTGAAGAAGGAGTTCTGTGTTGTACTGACA…	MGRFIFVSLGLLVLAFSLSGIGADQHCPFGWFSHNVSCYKLINDWKTWDEAQRFCMEEQENAQLASINDVGESVKLSDEISKTWSIIDVWIGLRLSKRKGIWEWSDGSNMTQTRWEEGEPNNFLKKEFCVVLTSRSRYLRWNDKDCNLRHRFLCKFQPRREASG	RecName: Full=C-type lectin lectoxin-Phi1; Short=CTL; Flags: Precursor [Philodryas olfersii]	A7X406.1	94.87
	SB1881_PMATCTL010	Putative percursor of snake venom C-type lectin	ATGTGGTCCTGGTTATTTATCTGCACCTTTCTGGGCATCACTTCCATGCATGATGTCTCTGCCCAGACCTGTCTTTGTGCCCAGGGTTCGTGTGCAAGTGGCTGGGTGCAGTATAAGTCTGCCTGCTACAAGGTTGTGAAGCAGCGATACACCTGGACTGAAGCTGAGATATCTTGTCAGAGTTCCATTCCGAGCTCCCACTTGGCCTCCATCCATAGCATGGAAGAAAATGATTTCATTTATCATTTGATGGGCAAACCAGTGCACTACAGCGAAGGACAGGCCTACTGGATTGGTGCACATGACTCATTCAAGGAGGGAACCTTTGTGTGGACAGATGGTTCAAGATTTGATTTCAACTCATTTCCTTCTGAACAACCTGATGGATTGTCAGGAGAA…	MWSWLFICTFLGITSMHDVSAQTCLCAQGSCASGWVQYKSACYKVVKQRYTWTEAEISCQSSIPSSHLASIHSMEENDFIYHLMGKPVHYSEGQAYWIGAHDSFKEGTFVWTDGSRFDFNSFPSEQPDGLSGEHYLGSWFIRNGKISWNDYANSWRFLSVCKYYLANSGCSLFEKK	snaclec purpureotin subunit beta-like [Pantherophis guttatus]	XP_034276182.1	89.47
C-type Natriuretic Peptide (CNP)	SB1881_PMATCNP001	Putative percursor of snake venom C-type Natriuretic Peptide	ATGTTCGCCTCCCGTCTGGCGGCCGGCGGGCTGCTCTTGCTGGCCCTGCTGGCCCTGGCCCTCGACGGCAAGCCGGCGGCCCCGCAGCCGCTGCGCAAGGCTCCGGCGGGCGGCACGACGGCGTGGCGGCGGGAGCTGACGGAGCAGCCGGAGGGGGCGTCGCGGCCCGCGGCTGGAGGAGGAGGAGGAGGAGGAGGAGGAGGAGGCGGCGGCCGCAGCGGCTCCAAGGCGGCCAACGCAGCCCCGACGGCACCGAAGAGCAAAGGGGCGGCGGCGGCGGCGGCGGCGGCGGCGCGGCTGATGCGGGATTTGCGCCCCGACAGCAAGCAGGCGCGGGCCGCCTGGGGCCGGATGGTGCACCCCGAGCACCACGCAGGAGGCGGCGGCGGTGGAGGCGGC…	MFASRLAAGGLLLLALLALALDGKPAAPQPLRKAPAGGTTAWRRELTEQPEGASRPAAGGGGGGGGGGGGGRSGSKAANAAPTAPKSKGAAAAAAAAARLMRDLRPDSKQARAAWGRMVHPEHHAGGGGGGGGGGGGASRRLKGVAKKGLGKGCFGLKLDRIGSMSGLGC	natriuretic peptide precursor [Philodryas chamissonis]	AJB84508.1	94.15
Ficolin (FICOLIN)	SB1881_PMATFICOLIN001	Putative percursor of snake venom Ficolin	ATGAAGCCTTGGGCTGGTTTCCACCTGATTTTCCTGGTTGCTAGTTCTGTGGAGGCTGAAGTCTCAAATTATGGCACTGGAGGACTCCAGGAGGCTGAAGCCACTTGCTGTGCACAGCTGAAGGGCTTAACACAATGCGGAAACAACAAGATTCTTCTCCAAGGTCAGGCTGGGATCCCTGGAATTCCAGGTGTGCCAGGAACAAATGGATCACCAGGGCTAAAGGGTGACCCTGGCCCTCAGGGGCCCCCAGGTGAAAGAGGATCTGCTGGGATAACTGGAAAAGCTGGACCGAAGGGAGACAAAGGCGACAAAGGGGATGCCTGCAACTTAGACAATTGTCAACCGAAAGAGACAGAAGCCAGAAACTGCAAGGACCTCCTGGAACGTGGGGAGACC…	MKPWAGFHLIFLVASSVEAEVSNYGTGGLQEAEATCCAQLKGLTQCGNNKILLQGQAGIPGIPGVPGTNGSPGLKGDPGPQGPPGERGSAGITGKAGPKGDKGDKGDACNLDNCQPKETEARNCKDLLERGETLSGWYTIYPTKENPVMAFCDMGTDGGGWLQFQRRQDGSVDFYRDWESYKKGFGNQGSEFWLGNDKIHLLTSSGTQQLRIDLEDFNGSRTFAIYSSFRIANESENYKLTLGSYLDGNMGDSLSGHNNYAFSTKDRDNDIYNGNCAASFKGGWWYTKCHSSNLNGLYHKGKHTSYADGINWAAGKGHYYSYKYADMKIRPQ	ryncolin-3-like [Thamnophis elegans]	XP_032076340.1	89.16
	SB1881_PMATFICOLIN002	Putative percursor of snake venom Ficolin	ATGAAGAGAGCTGGAGAGCAAGTAGGTCTCCTTCTGTTCTGCCTGATGATCGCAGTCCATCAAGGGGTCTCCTTCCCAGAACTTAAGGCGCTGGGCCTGGATGGCAACGATACAATAGCCATTGTGCGGGGGAGTCCAGGCTTGCCAGGACCAAAAGGGCCCCGGGGCCCCCCTGGTGTTCCAGGGGCCAAAGGAGACAAAGGGGACCCAGGACAACCTGGAGAGAAAGGCGAGAAAGGCGACCCAGGAGAAATTGACGAGAAGAAACTGGAGGCACTTCAGTGCAAGCGAGGTGCACCAAACTGCAAAGAGCTCCAGAAAAGAGGGGTGGTCCTGAGCGGCTGGTACACCATCTACCCCCAGGACTGCCAGCCACTGGAGGTGCTGTGTGACATGGAC…	MKRAGEQVGLLLFCLMIAVHQGVSFPELKALGLDGNDTIAIVRGSPGLPGPKGPRGPPGVPGAKGDKGDPGQPGEKGEKGDPGEIDEKKLEALQCKRGAPNCKELQKRGVVLSGWYTIYPQDCQPLEVLCDMDTDGGGWIVFQKRLDGSVDFFRDWDAYKRGFGNQLTEFWLGNDNLHRLTSLGKNELHVDLIDFNNKHSFAKYASFQVAAESDGYRLTLGAFTGGPAGDSLSNHDNMPFSTRDKQQDPKNFRCAETYKGAWWYNSCHHSNLNGKYWLGEHKTFADGINWRTGKGYNYSYKHSEMKIRPVD	ficolin-like 2, partial [Ahaetulla prasina]	AXL96625.1	79.15
Kunitz-type protein (KUNZ)	SB1881_PMATKUNZ001	Putative percursor of snake venom Kunitz-type protein	ATGGGCCGAAGTAGGAGCCGGCTTCAGGCCGGGCTCTTGGTGACTTGGTTTTTTTTCACCGGCCTGGTCGTTGGTCAGGAAGCCAACGGGGCAGGAGCCTCGTTTGGAGAAATGTGCCTCGCTCAGTTTACGGCCGGCTTTCCGGAGTTTGTGCTGGACACCAACGCCTCGGTGGACAACGGCGCCACTTTCCTGGGGTCGCCGCCGGTGGAGAGCAGCCGCGATTGCGTCCGCGCCTGTTGCAAGAACCCCAGTTGCAACTTGGCCCTGGTGGAGCAGGGCCCCGGGGAGGACGCGGACGGCATTCAGGGCTGTTACCTCCTCGACTGCTTTTACGACCAGGCCTTGGTCTGCAGGTTTGCCAAGAAGGACGGCTTCCTGAACTATGTCAGACGGGAG…	MGRSRSRLQAGLLVTWFFFTGLVVGQEANGAGASFGEMCLAQFTAGFPEFVLDTNASVDNGATFLGSPPVESSRDCVRACCKNPSCNLALVEQGPGEDADGIQGCYLLDCFYDQALVCRFAKKDGFLNYVRREVYNDYVTMRNRGNSDDQLPKAKAWMDVKVQPNDEPVILNGSESTDDNGIVNYEWTLLYGDSSVVMKKQNDIMMLSNMNEGIYIFQFTVTDTEDQQHCINITVTVLNSAQTVDHCLAPYKVGRCRGSFRRWYYNPEMEQCQQFIFGGCNPNKNNYVRKEECDLACKNVQGAVEKRQEPTCNGNCPPLYFKCEDGCCIDKDRECDYTPDCRDGSDEKSCDSYTQGFDKLQNINSMAKKYCVVMPDTGPCEESIPRWYYNPLTGKCGRF…	Kunitz-type protease inhibitor, partial [Boiga irregularis]	AWX67660.1	87.72
	SB1881_PMATKUNZ002	Putative percursor of snake venom Kunitz-type protein	ATGAGGCACGAAATGAGTCTGGCGCTGTTGATCACGTTGACGGCCGCTCTGGCGGCCGCAGAGTCGCCCCCAGACCGATGCCACTCGCCCAAGACAGTGGGCCCTTGTCGGGCATCCTTCCATCGGTGGTGGTACAATGCCACAAGTCAAACGTGCCAGGAATTCATTTTTGGGGGTTGCAGAGGCAGTGCCAACAACTTCTTCTCCGAACAGGACTGCTTCCAGACGTGTTTCAGAGGTGGGGCTGCAGAGGCCACAATGGTTCCTGGAGGGCCAGCCACTGAAGTGGCTACACCAAGAGCCGGAGGTCACCCAGAGGCCTACGAAAACAAGCCTGGCTTCAGAGAATTCTGTGCTGCGCCCCGGGTGGTAGGTCCCTGCCGGGCCTCCTTCCTCCGT…	MRHEMSLALLITLTAALAAAESPPDRCHSPKTVGPCRASFHRWWYNATSQTCQEFIFGGCRGSANNFFSEQDCFQTCFRGGAAEATMVPGGPATEVATPRAGGHPEAYENKPGFREFCAAPRVVGPCRASFLRWYFDLESRTCKRFIYGGCRGNKNNYLFQEHCLSQCTGDGEITEEPGDAGAHPRLPSEPFSISTRAVVLAVLLAILMTILLSSMGVFFVKICRKNPDLSVGTVWSTLDDKEYLMSNAYTL	kunitz-type protease inhibitor 2 isoform X1 [Pantherophis guttatus]	XP_034294279.1	89.29
Phospholipase B (PLB)	SB1881_PMATPLB001	Putative percursor of snake venom Phospholipase B	ATGGTCCGCTACGGCATCGCCTCCTCCTCGGACAATCGCCGCCTGCGATGCTGGAGCTGGTACTGGGGGGGACTTTTACTTCTCTGGGCCGCGGCAGGAACTCGAGCAGATCTCCACTATGCTACTGTATATTGGTTGAAAGCTGAAAAATCTTTCCAAGTTAGGGATGTATTAGACAAGAATGGCGATGCTTATGGCTATTACAATGACACTGTACAATCTACTGGATGGGGGATACTTGAGATCAAAGCAGGCTACGGTAATCAGCCCGTAAGCAATGAAATACTCATGTATGCTGCAGGTTTCTTGGAAGGCTACCTCACTGCTTCACGTATGAGTGACCATGTTTCAAATCTATATCATCAGCTGATTAAGAATGTCATCATTGAACAAAAAGTA…	MVRYGIASSSDNRRLRCWSWYWGGLLLLWAAAGTRADLHYATVYWLKAEKSFQVRDVLDKNGDAYGYYNDTVQSTGWGILEIKAGYGNQPVSNEILMYAAGFLEGYLTASRMSDHVSNLYHQLIKNVIIEQKVKDFMQKQDEWTRQQIKNNKDDPFWRNAGYIIAQLDGLYMGNVEWAKRQKRTPLTDFEISFLNAIGDLLDLIPALISDSRNNDFLSMREISRMYQWDMGHCSALIKVLPGYENIYFAHSSWFTYAATLRIYKHWDFRIIDPQTKTGRASFSSYPGFLVSLDDFYILGSGLIMLQTTNSVFNLSLLKQVVPESLFAWERVRIANMMADSGKNWAQTFEKENSGTYNNQYMILDTKKIKLQRSIDDGTLYIIEQVPNLVKYSDQTDILR…	phospholipase B-like 1 [Pantherophis guttatus]	XP_034259424.1	97.58
Snake venom Endogenous Matrix-Metalloproteinase 9 (seMMP-9)	SB1881_PMATSeMMP001	Putative percursor of snake venom endogenous matrix-metalloproteinase-9	ATGAGACTCCCAGTCCCGGCCTCCCTCCTCCTCCTCCTGGCGCTCCTGCCGCTGCCCTGTCCGTGGGCCGCCCCGACGGAGGCAGGGAAGGGCCCCGTAGTCATCACCTTCCCCGGGGACGCCGTCAGCCACCTGACGGACCGGGAGCTGGCCGCCCGCTACCTCCAGCGTTACGGGTACCTGACGACGACCAACCCCGGGGGGCAGGTGAAGCTGGAGACCCCCCTCAAGGCCATGCAGAAACAGCTGGGCTTGCCGGAAACAGGGGAGCTGGACGCCCCCACCCTCACGGCCATGCGAGCGCCCCGCTGCGGAGTCCCGGACGTGGGTCGCTTCCAGACCTTCGAGGGCGACCTCAAGTGGGACCACACGGACCTCACTTACCGGGTGGTCAACTAT…	MRLPVPASLLLLLALLPLPCPWAAPTEAGKGPVVITFPGDAVSHLTDRELAARYLQRYGYLTTTNPGGQVKLETPLKAMQKQLGLPETGELDAPTLTAMRAPRCGVPDVGRFQTFEGDLKWDHTDLTYRVVNYSPDLDGSIIEDAFARAFKVWSEVTPLTFTRQQEGEVDILIQFGTREHGDGYPFDGKDGLLAHAFPPGKDRFSGDAHFDDDEFWTLGTGIVVKTHFGNANGAICHFPFIFEGKSYPSCTTEGREDGLPWCATTPNYDQDKKYGFCPSELLFTYDGNSDGEKCVFPFVFEGKSYQGCTTDGRTDGYRWCATTANFDEDKKYGFCPNRDTAVIGGNSQGEPCSFPFKFLGQMYSSCTTEGRTDGKLWCATTSDYDADKKWGLCPDQGYS…	matrix metalloproteinase-9 [Pantherophis guttatus]	XP_034280049.1	89.57
Snake Venom Metalloproteinase P-III Class (SVMP P-III)	SB1881_PMATSVMPIII138	Putative percursor of snake venom metalloproteinase P-III Class	ATGATCCAAGTTCTTTTGGTAACTATATCTTTAGGGTTTTTTCCATATCAAGGGAGTTTATTATTCCTGGAATCCGGAAATGTTAAGGATTATGAGGTAGTATATCCACAAAAATTCCCTTTGTTGCCCAAAGGAGGACTTCAGAATGCTGAGCCAGAGACCAAGAATGAAGATACAATACAATATGAATTTCAAGTGAATGGAGAGCCATTGGTCCTTCACCTAGAAAGAAATAAAGGACTTTTTTCAGAAGATTACAGTGAAACTCATTATTCCCCTGATGGCAGAGAAATTACAACCACCCCTCCAGTTCAGGAACACTGCTATTATCATGGACACATTCAGAATGATGCTGACTCAACTGCAGTCATCAGTGCATGTAACGGTGTGAAAGGACAT…	MIQVLLVTISLGFFPYQGSLLFLESGNVKDYEVVYPQKFPLLPKGGLQNAEPETKNEDTIQYEFQVNGEPLVLHLERNKGLFSEDYSETHYSPDGREITTTPPVQEHCYYHGHIQNDADSTAVISACNGVKGHFKHQGETYFIEPLKLSNSEAHAVYKYENVEKEDETHKTCGVTETTWESDESIEKSPQLMVTPEQLRYLQAPKYIELCIVVDNVMFRKYTGNYTVIRTRVYEIVNTLNMIYRSLNIHVALTGVEFWSNQDQINVQADASVTLDLFGEWRKTNLLPRRRNDNAQLLTGINFNGPTLGLGYVGTLCKPKFSSAIVMDHNKMAVFIASAMAHEMGHNLGINHDRNSCTCGSNSCIMSPTLSFEPLYRFSNCSYQEHQSYLIRALPQCILN…	snake venom metalloproteinase 24, partial [Borikenophis portoricensis]	AXL96574.1	76.26
	SB1881_PMATSVMPIII240	Putative percursor of snake venom metalloproteinase P-III Class	ATGATCCAAGTACTCTTGGTGACTATATGCTTAGTGGTTTTTCCATATCAAGGGAGCTCTATGAAACTGAAATCCGGGAATGTTAATGATTATGAAGTAGTGTATCCACAGAAAGTGCCTGTATTGCCCAAAGGAGGACTTCAGAATGCTGAGCCAGAGACCGAGTATGAAGATACAATGCAATATGAATTTCAAGTGAATGGAGAGCCAGTGGTCCTTCACCTAAAAAGAAATAAAGGACTTTTTTCAGAAGATTACAGTGAAACTCATTATTCCCCTGATGGCAGAGAAATTACAACCACCCCTCCAGTTTGGAATCACTGCTATTATCATGGACACATCAAGAATGAAGCTGACTCAACTGCAGTCATCAGTGCATGTGACGGCTTGAAAGGACAT…	MIQVLLVTICLVVFPYQGSSMKLKSGNVNDYEVVYPQKVPVLPKGGLQNAEPETEYEDTMQYEFQVNGEPVVLHLKRNKGLFSEDYSETHYSPDGREITTTPPVWNHCYYHGHIKNEADSTAVISACDGLKGHFKHQGETYFIEPLKLSNSEAHAVYKYDSLEKEDGTHKTCGVTQTTWELDEPIEKISQVSITPEEQNTYLDAPKYIEFFIVVDNGMFRKYSSNLTAIRTRVYEIINIVNTIYRALNIHVALIGIEIWSNRDKINVQSAANVTLDLFGTWRETDLLPRRRNDNAQLITSIDFNGPTVGLGYVGTFCRSKHSSAIVQDHSALTSLMASTMAHEMGHNLGINHDTNACHCSSNACVMSPTIGSVPYYQFSSCSIQEHQRYLTRAQPQCIL…	snake venom metalloprotease [Philodryas olfersii]	ACS74987.1	92.52
	SB1881_PMATSVMPIII033	Putative percursor of snake venom metalloproteinase P-III Class	ATGATCCAAGCTCTCTTGGTTACTATATGCTTAGCGGGTTTTCCATATCAAGGGAGCTCTATAAAACTGGAATCCGGGAATGTTAATGATTATGAAGTAGTGTATCCACAAAAAGTGCCTGTATTGCCCAAAGGAGGACTTCAGAATGCTGAGCCAGAGACCGAATATGAAGATGCAATGCAATATGAATTTCAAGTGAATGGAGAGCCTGTGGTCCTTCACCTAGAAAGAAATAAAGGACTTTTTTCAGAAGATTACAGTGAAACTCATTATTCCCCTGATGGCAGAAAAATTATAACAAGCCCTCCAATTAAGGATCACTGCTATTATCATGGACACATCCAGAATGAAGCTGACTCAACTGCAGTCATCAGTGCATGCAATGGTTTGAAAGGACAT…	MIQALLVTICLAGFPYQGSSIKLESGNVNDYEVVYPQKVPVLPKGGLQNAEPETEYEDAMQYEFQVNGEPVVLHLERNKGLFSEDYSETHYSPDGRKIITSPPIKDHCYYHGHIQNEADSTAVISACNGLKGHFKHQGETYFIEPLKLSNSEAHAVYKYDSLEKEDKTHKTCRVTQTTWELNEPIEKISQVSITPEEQNKYLDAQKYIEFFIVVDNRMFRKYSSNFTDIRTRVYEIVNTLNTIYRALKIHVALIGLEIWSNGDQIKVQTNSTETLALFGAWREKDLLPRKRNDNAQLITDIDFDEATLGEAHMASFCHSRKSVAVVLDHSDRTSIMASTMSHELAHNLGIRHDRKFCNCNFNRCIMSPSASFQPSIQFSNCSIQDYQRYLIRRQPQCIL…	venom metalloprotease precursor [Philodryas chamissonis]	AJB84503.1	75.93
	SB1881_PMATSVMPIII022	Putative percursor of snake venom metalloproteinase P-III Class	ATGATCCAAGCTCTCTTGGTTACTATATGCTTAGCGGTTTTTCCATATCAAGGGAACTCGATAAAACTGGAATCCGGGAATGTTAATGATTATGAAGTAGTGTATCCACAAAAAGTGCCTGTATTGCCCAAAGGAGGACTTCAGAATGCTGAGCCAGAGACTGAGTATGAAGATGCAATGCAATTTGAATTTCAAGTGAATGGAGAGCCAGTGGTCCTTCACCTAGAAAGAAATAAAGGACTTTTTTCAGAAGATTACAGTGAAACTCATTATTCCCCTGATGGCAGAGAAATTACAACCACCCCTCCAGTTCGGAATCACTGCTATTATCATGGACACATCAAGAATGAAGCTGACTCAACTGCAGTCATCAGTGCATGCAATGGTTTGAAAGGACAT…	MIQALLVTICLAVFPYQGNSIKLESGNVNDYEVVYPQKVPVLPKGGLQNAEPETEYEDAMQFEFQVNGEPVVLHLERNKGLFSEDYSETHYSPDGREITTTPPVRNHCYYHGHIKNEADSTAVISACNGLKGHFKHQGETYFIEPLKLSNSEAHAVYKYDSLEKEDGTHKTCGVTQTTWELDESIEKISQVSITPEEQNTYLNAKKYIEFFIAVDNGMFRKYSSNLTAIRTRVYEIVNTLNTIYRALNIYVALIGLEIWSNRDKINVQSASNVTLDLFGEWRKTYLVPRKRNDNAQLITSIDFDGPTVGLGYVGTLCQLKHSSAIVQDHSDLTSLMASTMAHELGHNLGINHDTNACQCSSNACVMSPTIGSVPYYQFSSCSIQEHRRYLTRAQPQCIL…	venom metalloprotease precursor [Philodryas chamissonis]	AJB84503.1	93.17
	SB1881_PMATSVMPIII028	Putative percursor of snake venom metalloproteinase P-III Class	ATGATCCAAACTCTCTTGGTTACTATATGCTTAGCGATTTTTCCATATCAAGGGAGCTCTATAAAACTGGAATCCGGGAATGTTAATGATTATGAAGTAGTGTATCCACAAAAAGTGCCTGCGTTGCCTAAAGGAGGACTTCAGAATGCAGAGCCAGAGACCGAGTATGAAGATGCAATGCAATATGAATTTCAAGTGAATGGAGAGCCAGTGGTCCTTCACCTAGAAAGAAATAAAGGACTTTTTTCAGAAGATTACAGTGAAACTCATTATTCTCCTGATGGCAGAGAAATTACAACCACCCCCCCAGTTCAGAATTACTGCTATTATCATGGACACATCCAGAATGAAGCTGACTCAACTGCAGTAATCAGTGCATGTGACGGCTTGAAAGGACAT…	MIQTLLVTICLAIFPYQGSSIKLESGNVNDYEVVYPQKVPALPKGGLQNAEPETEYEDAMQYEFQVNGEPVVLHLERNKGLFSEDYSETHYSPDGREITTTPPVQNYCYYHGHIQNEADSTAVISACDGLKGHFKHQGETYFIEPLKLSNSEAHAVYKYDSLEKEDEIHKTCGVTQTTWELDEPIEKISQGSITPKEQNTYLDGKKYIEFFIVVDNGMFRKYTGNLTAIRTRVYEIVNTLNTMYRVLNIHVALIGLEIWSNQDQIHVQSNSSATLELFGEWREKKLIPRKRNDNAQLITSIVFNEETLGEAYLASLCMSRGSVAVVMDYSNLTSLMATVMAHELGHNLGMNHDTIDCSCNFNPCIMFPSASNVPYYQFSSCSIQEHRRYLSRYQPQCIL…	venom metalloprotease precursor [Philodryas chamissonis]	AJB84503.1	81.67
	SB1881_PMATSVMPIII001	Putative percursor of snake venom metalloproteinase P-III Class	ATGATCCAAGCTCTCTTGGTAACTATATGCTTAGCAGTTTTTCCATATCAAGGGAGCTCTATAATACTGGAATTCGGGAATGTTAATGATTATGAAGTAGTGTATCCACAAAAAGTGCCTGTATTGCCCAAAGGAGAACTTCAGAATGCTGAGCCAGAGACTGAATATGAAGATACAATACAACATGAATTTCAAGTGAATGGAGAGCCAGTGGTCCTTCACCTACAAAGAAATAAAGGACTTTTTTCGGAAGATTACAGTGAAACTCATTATTCCCCTGATGGCAAGGAAATTACAACCACCCCTCCAGTTCAGGATCACTGCTATTATCATGGACACATTCAGAATGATCCTGACTCAACTGCAGTCATCAGTGCATGTGATGGCTTGAAAGGACAT…	MIQALLVTICLAVFPYQGSSIILEFGNVNDYEVVYPQKVPVLPKGELQNAEPETEYEDTIQHEFQVNGEPVVLHLQRNKGLFSEDYSETHYSPDGKEITTTPPVQDHCYYHGHIQNDPDSTAVISACDGLKGHFKHQGETYFIEPLKLSNSEAHAVYKYDSLEKEDETHKTCGVTQTTWESDEPIEKSPQLMVTPEQLRYLEAPKYIELYIVVDNVMFRKYTGNYTAIRTRVYEIVNILNMIYRALKIHVALIGLEFWSNQDQINVQADASVTLDLFGEWRETDLLPRRSHDNAQLLTGINFNGPTVGIAYVGKLCSPMRSSAIVQDHNKMAKFIASSVAHEMGHNLGINHDIDSCTCGSDSCVMSPTLSSVPLYQFSNCSIQEHRNYLIRDLPQCILN…	venom metalloprotease precursor [Philodryas chamissonis]	AJB84503.1	79.38
	SB1881_PMATSVMPIII002	Putative percursor of snake venom metalloproteinase P-III Class	ATGATCCAAGTTCTCTTGGTTACTATATATTTAGTGGTTTTTCCATATCAAGGGAGTTCTATAATCCTGGAATCCGGGAATGTTAATGATTATGAAGTAGTATATCCACAAAAAGTGCCTGTGTTGCCCAAAGGAGGACTTCAGAATGCTGAGCCAGAGACCAAGTATGAAGATACAATGCAATATGAATTTCAAGTGAATGGAGAGCCAGTGGTCCTTCACCTAAAAAGAAATAAAGGACTTTTTTCAGAAGATTACAGTGAAACTCATTATTCGCCTGATGGCAGAGAAATTACAACCGCCCCTCCAGTTCAGGATCACTGCTATTATCATGGACACATCCAGAATGAAGCTGACTCAACTGCAGTCATCAGTGCATGCAATGGTTTGAAAGGACAT…	MIQVLLVTIYLVVFPYQGSSIILESGNVNDYEVVYPQKVPVLPKGGLQNAEPETKYEDTMQYEFQVNGEPVVLHLKRNKGLFSEDYSETHYSPDGREITTAPPVQDHCYYHGHIQNEADSTAVISACNGLKGHFKHQGETYFIEPLKLSNSEAHAVYKYDSLEKEDETHKTCGVTQTTWELDEPIENISQVSITPEEQNAYLDAQKYIEFFIVVDNRMFRKYSNNFSVISRRVYEIVNTLNTIYRALKIHVALIGLEIWSNGDQIKLQTNSTETLKLFGEWREKDLIPRKRNDYAQLITDIYFDEATLGEAYLGTLCQSRKSVAVVKDHTHSTGIMASTMSHELGHNLGIRHDRQFCNCNFYRCIMSPSVSYQPIIQFSNCSIQDHRRYLIRRQPQCIL…	venom metalloprotease precursor [Philodryas chamissonis]	AJB84503.1	76.59
	SB1881_PMATSVMPIII003	Putative percursor of snake venom metalloproteinase P-III Class	ATGATCCAAGCTCTCTTGGTAACTATATGCTTAGTGGTTTTTCCATATCAAGGGAGTTCTATAATCCTGGAAGCTGGGAAGGTTAACGATTATGAAGTAGTATATCCACAAAAAATCCCTGCATTGGCCAGAAGCAGAATTGAGCGGCGTGAGCAAAAGATGAAGTATGAAGATACCATGAAATATGAATTTAAAGTGAATGGAGAGCCAGTGGTCCTTCACTTAGAAAAAAATAGAGGACTTTTTTCCAAAGATTACACTGAGACTCATTATTCCCCTGATGGCAGAGAAATTACAACAAGCCCTCCAGTTGAGGATCACTGCTATTATCATGGTTACATTCAGAATGATGCCGATTCAATTGCAGTCATCAGTGCATGCGACGGCTTGAATGGGTAT…	MIQALLVTICLVVFPYQGSSIILEAGKVNDYEVVYPQKIPALARSRIERREQKMKYEDTMKYEFKVNGEPVVLHLEKNRGLFSKDYTETHYSPDGREITTSPPVEDHCYYHGYIQNDADSIAVISACDGLNGYFKNNGEMYLIEPLKTSENEAHAVYKYENLEKEDEIPKTCGAIHSSGKSDESIKKTSKLFSTPEEKEEYLESKKYIELYIVVDNLIFRKYNRNLTTIRTRVSQILNYVNQFYKPLNIHVALIGLEIWSDEDKIVINASSESTVTFFAEWRDSDLLPRKKNDNAQLLTGVHFDGLTLGVAYIGGMCNLWFSVGVIQDNNHQAVLTASIMTHEMGHNLGMQHDTDSCTCNEEPCIMKPAIGFYPPHQFSSCSLWYYEKYVMSENAQCIL…	LOW QUALITY PROTEIN: zinc metalloproteinase-disintegrin-like NaMP [Notechis scutatus]	XP_026536946.1	75.68
Vascular Endothelial Growth Factor (VEGF)	SB1881_PMATVEGF001	Putative percursor of snake venom vascular endothelial growth factor	ATGAACTTTCTGCTCACTTGGATCCACTGGGGGTTGGCGGCGCTGCTTTATTTCCACAACGCCAAGGTGTTGCAGGCTGCTCCTGCCCAGGGGGATGGAGAGAGGCAACAAGGTGAAGTTATCTCATTTATGAAGGTCTATGAGCGCAGTGCCTGCAGGGCAATTGAGACCATGGTAGATATTTTCCAGGAGTATCCTGATGAGGTGGAATACATCTTCAAGCCATCCTGTGTGGCCCTGATGAGATGTGCAGGATGCTGTAATGATGAAGCACTAGAATGTGTGCCTACAGAGGTGTACAATGTCACAATGGAGATCATGAAACTCAAACACTTTCAGAGCCAGCATATACATCCGATGAGCTTCCTGCAGCACAGTAGATGTGAATGCAGACCAAAG…	MNFLLTWIHWGLAALLYFHNAKVLQAAPAQGDGERQQGEVISFMKVYERSACRAIETMVDIFQEYPDEVEYIFKPSCVALMRCAGCCNDEALECVPTEVYNVTMEIMKLKHFQSQHIHPMSFLQHSRCECRPKKEVRIRQENHCEPCSERRKHLYKQDPLTCKCSCKFTDSRCKSKQLELNERTCRCEKPRR	vascular endothelial growth factor 1, partial [Borikenophis portoricensis]	AXL96597.1	97.40
	SB1881_PMATVEGF002	Putative percursor of snake venom vascular endothelial growth factor	ATGAACTTTCTGCTCACTTGGATCCACTGGGGGTTGGCGGCGCTGCTTTATTTCCACAACGCCAAGGTGTTGCAGGCTGCTCCTGCCCAGGGGGATGGAGAGAGGCAACAAGGTGAAGTTATCTCATTTATGAAGGTCTATGAGCGCAGTGCCTGCAGGGCAATTGAGACCATGGTAGATATTTTCCAGGAGTATCCTGATGAGGTGGAATACATCTTCAAGCCATCCTGTGTGGCCCTGATGAGATGTGCAGGATGCTGTAATGATGAAGCACTAGAATGTGTGCCTACAGAGGTGTACAATGTCACAATGGAGATCATGAAACTCAAACACTTTCAGAGCCAGCATATACATCCGATGAGCTTCCTGCAGCACAGTAGATGTGAATGCAGACCAAAG…	MNFLLTWIHWGLAALLYFHNAKVLQAAPAQGDGERQQGEVISFMKVYERSACRAIETMVDIFQEYPDEVEYIFKPSCVALMRCAGCCNDEALECVPTEVYNVTMEIMKLKHFQSQHIHPMSFLQHSRCECRPKKEVRIRQEKCEKPRR	vascular endothelial growth factor A isoform X3 [Thamnophis elegans]	XP_032072242.1	93.92
Waprin Protein (WAP)	SB1881_PMATWAP001	Putative percursor of snake venom Waprin protein	ATGAAACCTTGGATTCTACTTCTCCTAGCTGGTGTCCTCATTCTTTCAACTCAACAGACATCGGCAAAGCCCAAAAGAAGTCGTTACGAAATAGTCAAACCGGGTGAGTGTCCCATGTTCAAAATCTCTCCTGACCATCCATGTGACCAAAACTGTCAGTGGGACTCTAACTGCGAAGGGAATATGAAATGCTGCCCGGTGGGATGTGCCAGGGTCTGTTTCCCTCCAGGACCACTCTGA	MKPWILLLLAGVLILSTQQTSAKPKRSRYEIVKPGECPMFKISPDHPCDQNCQWDSNCEGNMKCCPVGCARVCFPPGPL	RecName: Full=Waprin-Phi3; Flags: Precursor [Philodryas olfersii]	A7X4M7.1	72.50

## Sheet: C. LATICEPS
Table S2. Identification and annotation of transcripts of putative toxins from the venom glands of Philodryadini snakes.
Chlorosoma laticeps
Toxin group	Sequence code	Annotation	Nucleotide sequence	Amino acid sequence	BLAST identification	Accession number	Identity %
5' nucleotidase (NUCL)	SB0512_CLATNUCL001	Putative percursor of snake venom 5' nucleotidase	ATGCAGAGCCCGAGGCGAGGGCGCGGGGCTCAGGGTTGCCCTGGAAGCGCCCCTTCGGCGACGCGGCGGCTCCTCGTCGGAGCCGTCTGGGTTTGCGCCGCGCTCTCGGCTGCCGCCGGCTCCTTCGAGCTCACCATTCTGCATACCAACGACGTCCACGCCCGCGTAGAGGAAAGCAGCCGGGACGCGGGCAAATGCGGCGGGCAGGACTGCTACGGGGGCGTCGCGCGCCGGGCTGCCAAGATCCAAGAGATCCGCGCCTCGCATCGCCACGTGTTGCTCCTGGACGCCGGGGATCAGTACCAGGGCACCATCTGGTTCAGCTACTACAAAGGGCGCGAAGTGGTGCAATTCATGAATATCCTGCGCTACGACGCGATGGCTCTAGGAAATCATGAA…	MQSPRRGRGAQGCPGSAPSATRRLLVGAVWVCAALSAAAGSFELTILHTNDVHARVEESSRDAGKCGGQDCYGGVARRAAKIQEIRASHRHVLLLDAGDQYQGTIWFSYYKGREVVQFMNILRYDAMALGNHEFDNGLDGLLDPLLKHVKFPILSANIRPKGPIASNISGYILPYKIINVGSEKVGIIGYTTKETPVLSNPGPYLEFRDEVEELQIHANKLTTLGVNKIIALGHSGFKEDRRIAQKVKGVDVVVGGHTNTFLYTGSPPSNEVAAGNYPFMELSDDGRQVPVVQAYAFGKYLGYLNVVFDDKGNVMKASGNPILLNKDIPEDPAVKAEVNKMSIQLKNYSSQEIGKTIVYLNGTTHACRFQECNLGNLICDAVVYNNLRHPDDDEWNHVS…	5' nucleotidase, partial [Spilotes sulphureus]	AXL95273.1	90.48
C-type Lectin (CTL)	SB0512_CLATCTL016	Putative percursor of snake venom C-type lectin	ATGGGGCGATTCATCTTTGTGAACCTGGGCTTGCTGGTCGTGGCTTTCTCCCTAAGGGGATCTGCAGCGGATTGTCCCTCTGGTTGGTCCTCCTATGATAAGTATTGTTACAAGGTCTTTGATGAACGCAAGAATTGGGACGAAGCAGAGCAATGCAGCTGGCAGTGGAGTGATGGCTCCAGCCTCGGTTACGAAGCCTGGGTTGAAGGACCCGATTGTGTTATGATGCGTTTACAGCCAGGTTTTATTGACTGGTACAGTGTAGAGTGCAAAAGCACATTGCCTTTCACCTGCAAGTTCCTGGCAAAGAGTGAGGATCCAGCTCCAGAGTGA	MGRFIFVNLGLLVVAFSLRGSAADCPSGWSSYDKYCYKVFDERKNWDEAEQCSWQWSDGSSLGYEAWVEGPDCVMMRLQPGFIDWYSVECKSTLPFTCKFLAKSEDPAPE	RecName: Full=Snaclec subunit B; AltName: Full=C-type lectin subunit B; Flags: Precursor [Philodryas olfersii]	Q09GK0.1	68.69
	SB0512_CLATCTL015	Putative percursor of snake venom C-type lectin	ATGGGGCGATTCAAGTTGCTGCACAGGGGCTTGGTTATCGTAGCATGCACAATGACGGGATCTGAAGCTTGCTGTCCCTGCGGTTGGTCCTCCTATGATAAGTATTGCTACAAGGTCTTTGATAAACGCAAGAATTGGGACGATGCCGAGAGGTTCTGCATGGAGCAGGGGAAAGGAGGCCACCTGGCCTCTCTCGGAAGCATTGAAGAGGGAAAATTTGTGGGCAAACTCATCTTTAAAAAATTAAAGGAACCCCCGACCCATGTCTGGATTGGACTGAGGGCTCAAGGCCAAGGACAGCAATGCAGCTCGAGGTGGAGTGATGGCTCCAGGATCGGTTATGAAAACTGGCATCCATTACAATCCAAAAAATGTATTGCGTTGTCAAAATGGACGGAG…	MGRFKLLHRGLVIVACTMTGSEACCPCGWSSYDKYCYKVFDKRKNWDDAERFCMEQGKGGHLASLGSIEEGKFVGKLIFKKLKEPPTHVWIGLRAQGQGQQCSSRWSDGSRIGYENWHPLQSKKCIALSKWTEYLKWYNHICDFTLPFICKFLAEPDDPE	RecName: Full=Snaclec subunit A; AltName: Full=C-type lectin subunit A; Flags: Precursor [Philodryas olfersii]	Q09GJ8.1	90.00
	SB0512_CLATCTL014	Putative percursor of snake venom C-type lectin	ATGGGGCGATTCATCTTTGTGAACCTGGGCTTGCTGGTCGTGGCTTTCTCCCTAAGGGGATCTGAAGCTTGCTGTCCCTGCGGTTGGTCCTCCTATGATAAGTATTGCTACAAGGTCTTTGATAAACGCAAGAATTGGGACGATGCCGAGAGGTTCTGCATGGAGCAGGGGAAAGGAGGCCACCTGGCCTCTCTCGGAAGCATTGAAGAGGGAAAATTTGTGGGCAAACTCATCTTTAAAAAATTAAAGGAACCCCAGACCCATGTCTGGATTGGACTGAGGGCTCAAGGCCAAGGACAGCAATGCAGCTCGAGGTGGAGTGATGGCTCCAGGATCGGTTATGAAAACTGGCATCCATTACAATCCAAAAAATGTATTGCGTTGTCAAAATGGACGGAG…	MGRFIFVNLGLLVVAFSLRGSEACCPCGWSSYDKYCYKVFDKRKNWDDAERFCMEQGKGGHLASLGSIEEGKFVGKLIFKKLKEPQTHVWIGLRAQGQGQQCSSRWSDGSRIGYENWHPLQSKKCIALSKWTEYLKWYNHICDFTLPFICKFLAEPDDPE	RecName: Full=Snaclec subunit A; AltName: Full=C-type lectin subunit A; Flags: Precursor [Philodryas olfersii]	Q09GJ8.1	95.00
	SB0512_CLATCTL004	Putative percursor of snake venom C-type lectin	ATGGAGCGATTCATCTTTGGAGTCTTGCTGGCTGTGGCCCTCTCCCTAAGTGGAACTGGAGCTGATCCCCAATGTCCCTCCGGTTGGTACTCCTATAATGGGCATTGCTACAAAGTCTTCAAACAATTCAAAAGCTGGGGCGATGCAGAGATGTTCTGCAGACGAGAGGAGGAAGGGGGCCATCTCGCCTCCATCCAAAGCAAGCCAGAGGCAGCTTTCGTGGCCAAGGTGGTCTTCCGCCATGTCTTGCTTTTCAATGTCTGGATCGGGCTGAGTGCTTCATGGAAACAACGCATCTGGAGGTGGAGTGATGGCTCCAGCTTCCGCTACAAATCCTGGGCACTAGGAGAACCCAACAACCTTCTTTGGAACGAGTACTGCGTTGCGCTGTCGAGCCTG…	MERFIFGVLLAVALSLSGTGADPQCPSGWYSYNGHCYKVFKQFKSWGDAEMFCRREEEGGHLASIQSKPEAAFVAKVVFRHVLLFNVWIGLSASWKQRIWRWSDGSSFRYKSWALGEPNNLLWNEYCVALSSLSGYHRWNDQSCGSKRYFICKFQPQGEGSTW	RecName: Full=C-type lectin lectoxin-Lio1; Short=CTL; Flags: Precursor [Erythrolamprus poecilogyrus]	A7X3Z4.1	71.78
	SB0512_CLATCTL002	Putative percursor of snake venom C-type lectin	ATGGGGCGATTCATCTTTGTGAACCTGGGCTTGCTGGTCGTGGCTTTCTCCCTAAGGGGATCTGCAGCGGATTGTCCCTCTGGTTGGTCCTCCTATGATAAGTATTGTTACAAGGTCTTTGATGAACGCAAGAATTGGGACGAAGCAGAGAGGTTCTGCATGGAGCAGAAGACGGGCAGCCATCTGGCCTCCATCCTTAGCAGTGAAGAAGGAGCTTATGTGGCCAATCTGGCCTTCAAACATTTGAAGCAACCTTCTATGTGGATCGGACTGAGTAATATATGGAATCAATGCAGCTGGCAGTGGAGTGATGGCTCCAGCCTCGGTTACGAAGCCTGGGTTGAAGGACCCGATTGTGTTATGATGCGTTTACAGCCAGGTTTTATTGACTGGTACAGT…	MGRFIFVNLGLLVVAFSLRGSAADCPSGWSSYDKYCYKVFDERKNWDEAERFCMEQKTGSHLASILSSEEGAYVANLAFKHLKQPSMWIGLSNIWNQCSWQWSDGSSLGYEAWVEGPDCVMMRLQPGFIDWYSVECKSTLPFTCKFLAKSEDPAPE	RecName: Full=Snaclec subunit B; AltName: Full=C-type lectin subunit B; Flags: Precursor [Philodryas olfersii]	Q09GK0	94.87
	SB0512_CLATCTL001	Putative percursor of snake venom C-type lectin	ATGGGGCGATTCATCTTTCTGACCCTCGGCTTGCTGGTCGTGGCTGTCTCCCTAAATGGAGCCAAAGGCTGTTGTTGTCCCCGTGATTGGCTCCCCATGAATGGGTTTTGCTACAAGGTCTTTGATGAGCACAAGAACTGGACTGATGCTGAGATGTTCTGCAGGAAAAACAATCCAGGCTGCCACCTTGCCTCCATCCATGGCACTGAAGAGTCAGCTGACTTGGCCGAATATGTTTCCGACTGTCTCATCAGTGGTGGAAATGTCTGGATTGGACTGAATGATCCAGAGAAACAACGCAATTGGCAGTGGACAGACAGATCCAATAACAGCTACCTGATGTGGAGCTCAGGAGAGCCCAACAACAGTGGGAAGAATGAACATTGTGTTGAACTTTGG…	MGRFIFLTLGLLVVAVSLNGAKGCCCPRDWLPMNGFCYKVFDEHKNWTDAEMFCRKNNPGCHLASIHGTEESADLAEYVSDCLISGGNVWIGLNDPEKQRNWQWTDRSNNSYLMWSSGEPNNSGKNEHCVELWRDSGYKNWNDKNCESIRAFLCKCRL	C-type lectin 3, partial [Ahaetulla prasina]	AXL96600.1	79.11
C-type Natriuretic Peptide (CNP)	SB0512_CLATCNP002	Putative percursor of snake venom C-type Natriuretic Peptide	ATGTTCGCCTCCCGTCTGGCGGCCGGCGGGCTGCTCTTGCTGGCCCTGCTGGCCCTGGCCCTCGACGGCAAGCCGGCGCCCCCGCAGCCGCTGCGCAAGCCTCCGGCGGGCGGCACGACGGCGTTGCGGCGGGAGCTGACGGAGCAGCCGGAGGGGTCGTCGGGTCCCGCGGCTGGCGGAGGAGGCCGCAGCGGCTCCAAGGCGGGCAACGCAGCCCCGACGGCACCGAAGAGCAAAGGGGCGGCGGCGGCGGCGGCGGCGGCGCGGCTGATGCGGGATTTGCGCCCCGACAGCAAGCAGGCGCGGGCCGCCTGGGGCCGGATGGTGCACCCCGAGCACCACGCAGGAGGCGGCGGCGGCGGCGGCGGGGGCGCCTCGCGTCGTCTGAAGGGGGTGGCC…	MFASRLAAGGLLLLALLALALDGKPAPPQPLRKPPAGGTTALRRELTEQPEGSSGPAAGGGGRSGSKAGNAAPTAPKSKGAAAAAAAARLMRDLRPDSKQARAAWGRMVHPEHHAGGGGGGGGGASRRLKGVAKKGLGKGCFGLKLDRIGSMSGLGC	natriuretic peptide [Calliophis bivirgatus]	QSI84022.1	80.56
	SB0512_CLATCNP001	Putative percursor of snake venom C-type Natriuretic Peptide	ATGTTCGCCTCCCGTCTGGCGGCCGGCGGGCTGCTCTTGCTGGCCCTGCTGGCCCTGGCCCTCGACGGCAAGCCGGCGCCCCCGCAGCCGCTGCGCAAGCCTCCGGCGGGCGGCACGACGGCGTTGCGGCGGGAGCTGACGGAGCAGCCGGAGGGGTCGTCGGGTCCCGCGGCTGGCGGAGGAGGCCGCAGCGGCTCCAAGGCGGGCAACGCAGCCCCGACGGCACCGAAGAGCAAAGGGGCGGCGGCGGCGGCGGCGGCGGCGCGGCTGATGCGGGATTTGCGCCCCGACAGCAAGCAGGCGCGGGCCGCCTGGGGCCGGATGGTGCACCCCGAGCACCACGCAGGAGGCGGCGGCGGCGGCGGTGGAGGCGGCGGCGGCGGGGGCGCCTCGCGTCGT…	MFASRLAAGGLLLLALLALALDGKPAPPQPLRKPPAGGTTALRRELTEQPEGSSGPAAGGGGRSGSKAGNAAPTAPKSKGAAAAAAAARLMRDLRPDSKQARAAWGRMVHPEHHAGGGGGGGGGGGGGGASRRLKGVAKKGLGKGCFGLKLDRIGSMSGLGC	natriuretic peptide [Calliophis bivirgatus]	QSI84022.1	81.51
Cystatin-C (CYS)	SB0512_CLATCYS001	Putative percursor of snake venom Cystatin-C	ATGGCGTTGTTGCGGGGGCTTTTGGTGGGCGGCTTACTCTTGCTCAGTTGCGTCTGCACGCAGGCGTTCGGGACCAGGCTCCTCGGGGGACTGGAGGATGCTTCCCCGGACGAACCGGGCGTCCGCAAGGCCCTTCAATTTGCCATGAACGAATACAACAGTGGAAGCAATGATATGTATCATAGTCGCGTATCCGAAGTGATCCGAACCCAAAAACAGATTGTCAGCGGAATTAAGTATTACTTCACAGTTAAGATTGGACGTACTGTTTGCCGTAAGGGAGCTTCTGACCTTGAAAATTGTGCATTTCATAGCACACCTAAACTGGCACAGACAATGACTTGCACCTTTGAGGTTTACGATATTCCTTGGATAAAGAGGATTTCCCTGGAAAAAAGT…	MALLRGLLVGGLLLLSCVCTQAFGTRLLGGLEDASPDEPGVRKALQFAMNEYNSGSNDMYHSRVSEVIRTQKQIVSGIKYYFTVKIGRTVCRKGASDLENCAFHSTPKLAQTMTCTFEVYDIPWIKRISLEKSSCT	cystatin [Notechis scutatus]	XP_026542252.1	77.08
Cysteine-rich secretory protein (CRISP)	SB0512_CLATCRISP001	Putative percursor of snake venom Cysteine-rich secretory protein	ATGATTGTCTTCATCTTGCTAAGTCTTGCTGCAGTGCTGCAACAGTCTTTTGGACTTGTTGATTTTAATTCTGAGTCACCCAGGAGACCAGAAATACAAAGGGTGATTGTTGACACGCACAATTCTTACAGAAGATCTGTCAGTCCAACTGCTAGCAACATGCTAAGAATGGAATGGTACGCTGAAGCTGCTGCAAATGCAGAACGTTGGGCGTCTCGGTGTATTTATGATCACAGCCCAGATTCTGACAGAGTTCTTGATGGAATACAATGTGGTGAAAATATATACAAGTCACCTAATCCCATGACATGGACTGAAATAATGCAGTCGTGGTATGATGAATACAAACATTTTGTCTTTGGCTATGGAGCAAACCCATCAAATTCTGTTATTGGCCAT…	MIVFILLSLAAVLQQSFGLVDFNSESPRRPEIQRVIVDTHNSYRRSVSPTASNMLRMEWYAEAAANAERWASRCIYDHSPDSDRVLDGIQCGENIYKSPNPMTWTEIMQSWYDEYKHFVFGYGANPSNSVIGHYTQIVWYKSYRIGCAAYYCPSSRYNYFYVCQYCPAGNFAGRTATPYNSGPTCGDCPSACDNGLCTNPCTHKNEFTNCNDLVQDSSCQDDWIKSNCAATCFCKNEII	RecName: Full=Cysteine-rich venom protein; Short=CRVP; AltName: Full=CRISP-PHI1; AltName: Full=CRISP-PHI2; AltName: Full=Cysteine-rich secretory protein; Flags: Precursor [Philodryas olfersii]	Q09GJ9.1	92.05
Phospholipase A2 inhibitor (iPLA)	SB0512_CLATiPLA002	Putative percursor of snake venom phospholipase A2 inhibitor	ATGAAGCATCTTCTTATTTTCACTGCTTTGATAATTACAGCAACTGCTGATGACCTGATCTGCACATGTTCTGCGTCAACGATTGGACCAGCGTGCAGCATGGCAAATACTTGTACTATCCCAAAGGGACAATGTTATTCAATTCAGAGGCAAATTGCTACCGAGAAAGATAAGTCAGTCAATGGAACAAGTAAAGGCTGCCAAGAAGACAAAGATCCTAAGGTCTGCAATGAAGGGGTTGTGTTCATTTCAACTGAGAATGTTTTTTATCTGCTGAGCAATGTTACATGCTGTGACAAAAATGAATGCAACAAAGATGTCATTGTAGAACTTCCAAACGTTTCAACCCTTAAGACTCTTTCCAGCAAAAAGCTGGTTTGCCCATCATGCTTTATTTTG…	MKHLLIFTALIITATADDLICTCSASTIGPACSMANTCTIPKGQCYSIQRQIATEKDKSVNGTSKGCQEDKDPKVCNEGVVFISTENVFYLLSNVTCCDKNECNKDVIVELPNVSTLKTLSSKKLVCPSCFILGKKECDAKQMNCSEGQDKCFTIIGKITKGEASQDFAAKGCAAQSAILKNGTTLTFGDASYKLDNVEVVEAKGGVSQISSCLSFAILLPSVLWFLLDSSLY	phospholipase A2 inhibitor and Ly6/PLAUR domain-containing protein-like [Pseudonaja textilis]	XP_026571254.1	63.71
	SB0512_CLATiPLA001	Putative percursor of snake venom phospholipase A2 inhibitor	ATGAAGCATCTTCTTATTTTTACTGCTTTGATAATTACAGCAACTGCTGATGACCTGATCTGCACATGTTCTGCGTCAACGATTGGACCAGCGTGCAGCATGGCAAATACTTGTACTATCCCAAAGGGACAATGTTATTCAATTCAGAGGCAAATTGCTACCGAGAAAGATAAGTCAGTCAATGGAACAAGTAAAGGCTGCCAAGAAGACAAAGATCCTAAGGTCTGCAATGAAGGGGTTGTGTTCATTTCAACTGAGAATGTTTTTTATCTGCTGAGCAATGTTACATGCTGTGACAAAAATGAATGCAACAAAGATGTCATTGTAGAACTTCCAAACGTTTCAACCCTTAAGACTCTTTCCAGCAAAAAGCTGGTTTGCCCATCATGCTTTATTTTG…	MKHLLIFTALIITATADDLICTCSASTIGPACSMANTCTIPKGQCYSIQRQIATEKDKSVNGTSKGCQEDKDPKVCNEGVVFISTENVFYLLSNVTCCDKNECNKDVIVELPNVSTLKTLSSKKLVCPSCFILGKKECDAKQMNCSEGQDKCFTIIGKITKGDASQDFAAKGCAAQSAILKNGTTVTFGDTSYKLNTVEVVEAKGGVSQISSCLSFAILLPSVLWFLLDSSLY	phospholipase A2 inhibitor and Ly6/PLAUR domain-containing protein-like [Pseudonaja textilis]	XP_026571254.1	62.87
Phospholipase B (PLB)	SB0512_CLATPLB001	Putative percursor of snake venom Phospholipase B	ATGGTCCGCCACGGCATCGCCTCCTCCTCCTCCTCCTCCTCGGACAATCGCCGCCTGCGATGCTGGAGCTGGTACTGGGGGGGACTTTTACTTCTCTGGGCCGTGGCGGAAACTCGAGCAGATCTCCACTATGCTACTGTATATTGGTTGGAAGCTGAAAAATCTTTCCAAATTAGGGATGTATTAGACAAGAATGGCGATGCTTATGGCTATTACAATGACACTGTACAATCTACTGGATGGGGGATACTTGAGATCAAAGCAGGCTACGGTAATCAGCCCGTAAGCAATGAAAAACTCATGTACGCTGCAGGTTTCTTGGAAGGCTACCTCACTGCTTCACGTATGAGTGACCATGTTGCAAATCTATATCATCAGCTGATTAAGAATGTCATCATT…	MVRHGIASSSSSSSDNRRLRCWSWYWGGLLLLWAVAETRADLHYATVYWLEAEKSFQIRDVLDKNGDAYGYYNDTVQSTGWGILEIKAGYGNQPVSNEKLMYAAGFLEGYLTASRMSDHVANLYHQLIKNVIIEQKVKDFMQKQDEWTRQQIKNNKDDPFWRNAGYIIAQLDGLYMGNVEWAKRQKRTPLTDFEISFLNAIGDLLDLIPALISDSRNNDFLSMREISRMYQWDMGHCSALIKVLPGYENIYFAHSSWFTYAATLRIYKHWDFRITDPQTKTGRASFSSYPGFLVSLDDFYILGSGLIMLQTTNSVFNLSLLKQVVPESLFAWERVRIANMMADSGKSWAQTFEKENSGTYNNQYMILDTKKIKLQRSIDDGTLYIIEQVPNLVKYSDQT…	phospholipase B-like 1 [Pantherophis guttatus]	XP_034259424.1	94.43
Snake Venom Acid Lipase (SVLIPA)	SB0512_CLATSVLIPA002	Putative percursor of snake venom Acid Lipase	ATGTGGCTGCTAATAATTGCAGTGAGCTTGTTCCAAGGCCTGGTAAATTCATCAGTGCTTGAGAGAAGAAAAAGAGGCGTGGATCCAGAAACATCCATGAACATTAGTGAAATTATTTTATTCAGAGGATATCCCAGTGAGGAATATGAGGTGGTGACAGATGATGGATATTTCCTAAGTATTAATAGAATTCCTTATGGAAAAATAAGTCAGAAAACCAAGGAACGGAGACCAGCTGTGTTTCTGCAACATGGCTTTCTTGCTGATGGCAGTAACTGGGTGACCAACCTAGACTACAACAGCTTGGGTTTTGTGCTAGCTGACGCTGGTTTTGATGTTTGGTTAGGGAACAGCAGAGGAAACACTTGGTCCCGAAAACACACCAACTATACCACAAAG…	MWLLIIAVSLFQGLVNSSVLERRKRGVDPETSMNISEIILFRGYPSEEYEVVTDDGYFLSINRIPYGKISQKTKERRPAVFLQHGFLADGSNWVTNLDYNSLGFVLADAGFDVWLGNSRGNTWSRKHTNYTTKQKEFWMFSFDEMAKYDLPASINFVLNKTGQEQLFYVGHSQGTTIGFIAFSAFPELAKKINMFFGLAPVMNTMFSSGALAKLGELPELLLKEIFGTKEFFPQNALIKWLATQVCDHVLLDDLCGNFFFLLCGFNEKNLNMSRVDVYSTHCPAGTSVQNMLHWCQVVKSGEMRAFDWGSRKENMAHYNQPTPPPYKMKGMLVPTAIWTGGHDFLADRKDVAMLITMIPNLIYHKEIPDWEHLDFIWGLDAPQRMFRDMIQMMRKAQYAH	putative lysosomal acid lipase/cholesteryl ester hydrolase [Pseudonaja textilis]	XP_026566277.1	91.50
Snake Venom Coagulation Factor X (FAXV)	SB0512_CLATFAXV001	Putative percursor of snake venom coagulation factor X	ATGGCTCCTCAGCTACTCCTCTGTCTGATCCTCACTTTTCTGTGGAGTCTCCCAAAGACTGAAAGTAATGTATTCTTAAAAAGCAAAGTGGCAAATAGATTTTTGCAAAGAACGAAACGAGCTAATTCACTGTTTGAGGAATTTAAACCGGGAAACATTGAAAGGGAATGTGTTGAAGAGAGATGCTCAAAAGAAGAAGCCAGGGAGGCATTTGAAGATCAAGAGAAAACTGAGAACTTCTGGAATATTTATGTAGATGGGGATCAGTGTTTCTCAAACCCCTGTCATTATGGTGGGACATGCAAAGACGGCATTGGTAGCTATACCTGTACCTGTTTGGCTGGCTATCAAGGGAAAAACTGTGAATATCTCATACATAAGTCCTGCAGATTGAACAAC…	MAPQLLLCLILTFLWSLPKTESNVFLKSKVANRFLQRTKRANSLFEEFKPGNIERECVEERCSKEEAREAFEDQEKTENFWNIYVDGDQCFSNPCHYGGTCKDGIGSYTCTCLAGYQGKNCEYLIHKSCRLNNGDCWHFCKLDQNEIQCSCAEGYILGDDGQSCVAGVEFPCGKITKARNKREASLPNFPEDFPDAYDEIDEHHFVETSTDFSSLVPIVQSQNETLKSKSDDDSDRNARVINGTDCKPGECPWQALLINENGDGFCGGTILSPIYVLTAAHCMNQTKYIKVVVGEVDISRKTTGRLLAVDKIYMHQKFVLATYDYDIAIIQLKTPIRFSENVIPACLPTADFANQVLMKQDLGTVSGFGRTKERGRTSHTLKVVKLPYVDRHVCKLSSN…	coagulation factor X [Pantherophis guttatus]	XP_034274932.1	90.29
Snake venom Endogenous Matrix-Metalloproteinase 9 (seMMP-9)	SB0512_CLATSeMMP007	Putative percursor of snake venom endogenous matrix-metalloproteinase-9	ATGAGACTCCCAGTCCCGGCCTCCCTCCTCCTCCTCCTGGCGCTCCTGCCGCTGCCCTGTCCGTGGGCCGCCCCGACGGAAGGGAAGGGCCCCCTAGTCATCACCTTCCCCGGGGACGCCGTCAGCCACCTGACGGACCGGGAGCTGGCCGCCCGCTACCTCCAGCGTTACGGGTACCTGACCACGACCAACCCCGGGGGGCAGGTGGAGCTGGAGACCCCCCTCAAGGCCATGCAGAAACAGCTGGGCTTGCCGGAAACAGGGGAGCTGGACGCCCCCACCCTCACGGCCATGCGAGCGCCCCGCTGCGGAGTCCCGGACGTGGGTCGCTTCCAGACCTTCGAGGGCGACCTCAAGTGGGACCACACGGACCTCACTTACCGGGTGGTCAACCATTCC…	MRLPVPASLLLLLALLPLPCPWAAPTEGKGPLVITFPGDAVSHLTDRELAARYLQRYGYLTTTNPGGQVELETPLKAMQKQLGLPETGELDAPTLTAMRAPRCGVPDVGRFQTFEGDLKWDHTDLTYRVVNHSPDLDGSIIEDAFVRAFQVWSDVTPLTFTRRQEGEVDILIQFGTGEHGDGYPFDGSDGLLAHAFPPGKDRFSGDAHFDDDEFWTLGRGVVVKTHFGNANGALCHFPFIFEGRSYSSCTTEGREDGLPWCATTPSYDQDKTYGFCPSELLFTYDGNSNGEKCVFPFVFEGKSYQGCTTDGRTDGYRWCATTANFDQDKKYGFCPNRDMAVVGGNSQGEPCSFPFKFLGQTYSSCTTEGREDGRLWCATTSDYDADQKWGFCPDRGYSL…	matrix metalloproteinase-9 [Pantherophis guttatus]	XP_034280049.1	86.08
Snake Venom Metalloproteinase P-III Class (SVMP P-III)	SB0512_CLATSVMPIII003	Putative percursor of snake venom metalloproteinase P-III Class	ATGATCCAAGTTCTATTGGTTACTATATACTTAGTGGTTTTTCCATATCAAGGGAGTTCTATAATCCTGGAATCCGGGAATGTTAATGATTATGAAGTAGTATATCCACAAAAAGTGCCTGTATTGCCCAAAGGAGGACTTCAGAATGCTGAGTCAGAGATCGAGTATGAAGATACAATGCAATATGAATTTCAAATGAATGGAGAGCCAGTGGTCCTTCACCTAGAAAGAAATAAAGGACTTTTTTCAGAAGATTACAGTGAAACTCATTATTCCCCTGATGGCAGGGAAATTACAACAAGCCCTCCAGTTCAGAATCACTGCTATTATCATGGACACATCCAGAATGAAGCTGACTCAACTGCAGTCATCAGTGCATGCAACGGCTTGAAAGGACAT…	MIQVLLVTIYLVVFPYQGSSIILESGNVNDYEVVYPQKVPVLPKGGLQNAESEIEYEDTMQYEFQMNGEPVVLHLERNKGLFSEDYSETHYSPDGREITTSPPVQNHCYYHGHIQNEADSTAVISACNGLKGHFKHQGETYFIEPLKLSNSEAHAVYKYDSLEKEDETHKTCGVTHTAWELDEPIEKISQVSITPEEQNAYLNAKKYIEFFIVVDNGMFKKYSSNLTAIRTRVYEIVNTVNKIYRALNIHVALIGLEFWSNKDKIDVQSAANVTLDLFGKWRETDLLPRRNHDNAQLITSTDFNGPTVGLGYVGTFCRPKHSSAIVQDHSNLTSSMMASIMAHEMGHNLGINHDTNACRCSSNACVMSPTIGSVPQYQFSSCSIEQHRSYLIRVQPQCI…	snake venom metalloproteinase 13, partial [Borikenophis portoricensis]	AXL96563.1	84.42
	SB0512_CLATSVMPIII007	Putative percursor of snake venom metalloproteinase P-III Class	ATGATCCAAGTTCTATTGGTTACTATATACTTAGTGGTTTTTCCATATCAAGGGAGCTCTATAATCCTGGAATCCGGGAATGTTAATGATTATGAAGTAGTATATCCACAAAAAGTTCCTGTATTGCCCAAAGGAGGACTTCAGAATGCTGAGCCAGAGACCGAGTATGAAGATACAATGCAATATGAATTTCAAGTGAATGGAGAGCCAGTGGTCCTTCACCTAGAAAGAAATAAAGGACTTTTTTCGGAAGATTACAGTGAAACTCATTATTCCCCTGATGGCAGGGAAATTACAACAAGCCCTCCAGTTCAGGATCACTGCTATTATCATGGACACATCCAGAATGAAGCTGACTCAACTGCAGTCATCAGTGCATGTGACGGTTTGAAAGGACAT…	MIQVLLVTIYLVVFPYQGSSIILESGNVNDYEVVYPQKVPVLPKGGLQNAEPETEYEDTMQYEFQVNGEPVVLHLERNKGLFSEDYSETHYSPDGREITTSPPVQDHCYYHGHIQNEADSTAVISACDGLKGHFKHQGETYFIEPLKLSNSEAHAVYKYDSLEKEDETHKTCGVIQTAWELAEPIEKISQVSITPEEQNTYLNAKKYIEFFIVVDNGMFRKYSSNLTAIRTRVYEIVNSLNTIYRPLNIHVALIGLEFWSNRDKINVQSAANVTLDLFGTWRETDLLPRRNHDNAQLITSTDFNGPTVGLGYVGTFCRPKHSSAIVQDHSDLTSMMASTMAHEMGHNLGINHDTNACRCSSNACVMSPTIGSVPQYQFSSCSIQEHQRYLTRAQPQCIL…	snake venom metalloprotease [Philodryas olfersii]	ACS74987.1	90.41
	SB0512_CLATSVMPIII001	Putative percursor of snake venom metalloproteinase P-III Class	ATGATCCAAGCTCTCTTGGTAACTATATGCTTAGTGGTTTTTCCATATCAAGGGAGTTCTATAATCCTGGAATCCGGGAATGTTAATGATTATGAAGCAGTATATCCACAAAAAGTGCCTGTATTGCCCAAAGGAGGACTTCAGAATGCTGAGCCAGAGACTGAGTATGAAGATGCAATGCAATTTGAATTTCAAGTGAATGGAGAGCCAGTGGTCCTTCATCTAGAAAGAAATAAAGGACTTTTTTCGGAAGATTACAGTGAAACTCATTATTCTCCTGATGGCAGAGAAATTACAACCACCCCTCCAGTTCAGGATCACTGCTATTATCATGGACACATCCAGAATGAAGCTGACTCAACTGCAGTCATCAGTGCATGTGACGGCTTGAAAGGACAT…	MIQALLVTICLVVFPYQGSSIILESGNVNDYEAVYPQKVPVLPKGGLQNAEPETEYEDAMQFEFQVNGEPVVLHLERNKGLFSEDYSETHYSPDGREITTTPPVQDHCYYHGHIQNEADSTAVISACDGLKGHFKHQGETYFVEPLKLSNSEAHAVYKYDSLEKEDETHKTCGVTQTTWELDEPIEKISQVSITPEEQNAYLNAQKYIEFFIVVDNRMFSKFSSNFTVIRTRVFEIVNTLNMIYKALKIHVALIGLEIWSNGDQINIKSKASETLKFFGDWRKKHLLPRKRNDNAQLITNIDFDGTTVGKAYVGSLCKLKKSVGVVQDYSDRTSMMATLMAHELGHNLGMDHDTNYCNCNLNQCIMFPSLGLEPSYWFTDCSIQNHRRYLIRHHPQCIL…	venom metalloprotease precursor [Philodryas chamissonis]	AJB84503.1	79.54
Snake Venom Serinoproteinase (SVSP)	SB0512_CLATSVSP015	Putative percursor of snake venom serinoproteinase	ATGATTGTAGTGCTCGAAGCACTTCTGATACTATGCCTTTCTTACGCAAGAACCCCTCCTAATCGGATCATTGGAGGCTTGGAATGTAACCAAAGAGGACATCGTTCCCTTGTACTCTTGTATAACTCTGCAGGGTATTTCTGCTCTGGGACCTTGCTTAATCACGAATGGGTGCTCACTGCTGCACACTGCAACAGAGAAAATATCCAGATAAAGCTTGGTGTGCATAACTTACATGTACCCAATGAGGATGAGCAGATAAGAGTCCCGAAGGACAAGTTGTGTTGTCTCGGTACCAGGAACTGTACCCAAATGAACCAGGACATCATGTTAATCAGGCTGAACAGTTCTGTTAACTATAGTAGACGCATCGCACCGCTCAGCTTGCCCTCCAACCCT…	MIVVLEALLILCLSYARTPPNRIIGGLECNQRGHRSLVLLYNSAGYFCSGTLLNHEWVLTAAHCNRENIQIKLGVHNLHVPNEDEQIRVPKDKLCCLGTRNCTQMNQDIMLIRLNSSVNYSRRIAPLSLPSNPPRVGSVCRIMGWGAITSPEVTYPEVPHCVNIQILHKEVCEAAYPILEGISNVLCAGELEGGKDSCKGDSGGPLICNGQIQGIVSWGHDHCALVLEPGVYTKVFDYIDWIQGIMAGNANVICPGDNF	RecName: Full=Snake venom serine protease; Short=SVSP; Flags: Precursor [Philodryas olfersii]	Q09GK1.1	86.87
	SB0512_CLATSVSP002	Putative percursor of snake venom serinoproteinase	ATGGCACTGATCGGAGTGCTAGCAAACCTTCTGATACTATGCCTTTCTTACGCAAGAACCCCTCCTAATCGGATCATTGGAGGCTTGGAATGTAACCAAAGAGGACATCGTTCCCTTGTACTCTTGTATAACTCTGCAGGGTATTTCTGCTCTGGGACCTTGCTTAATCACGAATGGGTGCTCACTGCTGCACACTGCAACAGAGAAAATATCCAGATAAAGCTTGGTGTGCATAACTTACATGTACCCAATGAGGATGAGCAGATAAGAGTCCCGAAGGACAAGTTGTGTTGTCTCGGTACCAGGAACTGTACCCAAATGAACCAGGACATCATGTTAATCAGGCTGAACAGTTCTGTTAACTATAGTAGACGCATCGCACCGCTCAGCTTGCCCTCC…	MALIGVLANLLILCLSYARTPPNRIIGGLECNQRGHRSLVLLYNSAGYFCSGTLLNHEWVLTAAHCNRENIQIKLGVHNLHVPNEDEQIRVPKDKLCCLGTRNCTQMNQDIMLIRLNSSVNYSRRIAPLSLPSNPPRVGSVCRIMGWGAITSPEVTYPEVPHCVNIQILHKEVCEAAYPILEGISNVLCAGELEGGKDSCKGDSGGPLICNGQIQGIVSWGHDHCALVLEPGVYTKVFDYIDWIQGIMAGNANVICPGDNF	RecName: Full=Snake venom serine protease; Short=SVSP; Flags: Precursor [Philodryas olfersii]	Q09GK1.1	88.51
Three-Finger Toxin (3FTX)	SB0512_CLAT3FTx005	Putative percursor of snake venom Three-finger toxin	ATGAAAACTCTGCTGCTGTCCTTGGTGGTGGTGGCATTCGTGTACCTGCACTCAGGACACACCATTAAATGTTGGTCATGCGACAACATTATTTGTATTAAGTCTCAGGATTGTCCAAATGCAACGGCATGCTTTAAAAAGAGCTCTGGTCTATTAGAACTGAATGTTGACAGGGGATGTGCTCCTGATTGCACTTATCCGGCAGCCGATGAGACAATTCAATATTGCGCAAAAGACAACTGCAACATGTAG	MKTLLLSLVVVAFVYLHSGHTIKCWSCDNIICIKSQDCPNATACFKKSSGLLELNVDRGCAPDCTYPAADETIQYCAKDNCNM	three-finger toxin [Helicops leopardinus]	UMW88050.1	62.20
	SB0512_CLAT3FTx001	Putative percursor of snake venom Three-finger toxin	ATGAAAACTCTGCTGCTGTCCTTGGTGGTGGTGGCATTCCTATGCCTGGACTCAGGACACACCATTAAATGTTATTCATGCTCTGGACCACTTTGTATGACTTTTCGGGATTGTCCAGATGCAATGGCATGTTCTAGAAAGAGGTCTGGTCTATTAGGAGAGAAGGTCATCAAGGAATGTGCTCCTGATTGCACTTATCCGGCACCCGGTGAGACAATTCAATATTGCGCAAAAGACAACTGCAACATGTAG	MKTLLLSLVVVAFLCLDSGHTIKCYSCSGPLCMTFRDCPDAMACSRKRSGLLGEKVIKECAPDCTYPAPGETIQYCAKDNCNM	three-finger toxin [Helicops leopardinus]	UMW88048.1	65.85
Vascular Endothelial Growth Factor (VEGF)	SB0512_CLATVEGF003	Putative percursor of snake venom vascular endothelial growth factor	ATGAACTTTCTGCTCACTTGGATCCACTGGGGGTTGGCGGCGCTGCTTTATTTCCACAACGCCAAGGTGTTGCAGGCTGCTCCTGCCCAGGGAGATGGAGAGAGGCAACAAGGTGAAGTTATCTCCTTTATGAAGGTCTATGAGCGCAGTGCCTGCAGGGTAATTGAGACCATGGTAGATATTTTCCAGGAGTATCCTGATGAGGTGGAATACATCTTCAAGCCATCCTGTGTGGCCCTGATGAGATGTGGAGGATGCTGTAATGATGAAGCACTAGAATGTGTGCCTACAGAGGTGTACAATGTCACAATGGAGATCATGAAACTCAAACACTTTCAGAGCCAGCATATACATCCGATGAGCTTCCTGCAGCACAGTAGATGTGAATGCAGACCAAAG…	MNFLLTWIHWGLAALLYFHNAKVLQAAPAQGDGERQQGEVISFMKVYERSACRVIETMVDIFQEYPDEVEYIFKPSCVALMRCGGCCNDEALECVPTEVYNVTMEIMKLKHFQSQHIHPMSFLQHSRCECRPKKEIRIRQENHCEPCSERRKHLYKQDPLTCKCSCKFTDSRCKSKQLELNERTCRCEKPRR	vascular endothelial growth factor 1, partial [Borikenophis portoricensis]	AXL96597.1	96.88
	SB0512_CLATVEGF001	Putative percursor of snake venom vascular endothelial growth factor	ATGAACTTTCTGCTCACTTGGATCCACTGGGGGTTGGCGGCGCTGCTTTATTTCCACAACGCCAAGGTGTTGCAGGCTGCTCCTGCCCAGGGAGATGGAGAGAGGCAACAAGGTGAAGTTATCTCCCTTATGAAGGGCTATGAGCGCAGTGCCTGCAGGGTAATTGAGACCATGGTAGATATTTTCCAGGAGTATCCTGATGAGGTGGAATACATCTTCAAGCCATCCTGTGTGGCCCTGATGAGATGTGGAGGATGCTGTAATGATGAAGCACTAGAATGTGTGCCTACAGAGGTGTACAATGTCACAATGGAGATCATGAAACTCAAACACTTTCAGAGCCAGCATATACATCCGATGAGCTTCCTGCAGCACAGTAGATGTGAATGCAGACCAAAG…	MNFLLTWIHWGLAALLYFHNAKVLQAAPAQGDGERQQGEVISLMKGYERSACRVIETMVDIFQEYPDEVEYIFKPSCVALMRCGGCCNDEALECVPTEVYNVTMEIMKLKHFQSQHIHPMSFLQHSRCECRPKKEIRIRQEKKSKRGKGKGQKRKRKRGRYKPQNFHCEPCSERRKHLYKQDPLTCKCSCKFTDSRCKSKQLELNERTCRCEKPRR	vascular endothelial growth factor A isoform X1 [Thamnophis elegans]	XP_032072240.1	93.52
Waprin Protein (WAP)	SB0512_CLATWAP002	Putative percursor of snake venom Waprin protein	ATGACGCTCAGGAGAGGCAGCTGCCCGCTCCTCCTCTTCTCCCTGGTGGGTCTCCTCACGACCCGTGCTCAGGAGCCTGGAGAGAACACCACAGCGGCCGCAGAGAAAGCTGGCACCTGCCCCCGGGCAGAGTTGGAGATGCCCAATAGGAACTGCACGGAGGAGTGCCAGTCCGATGCCGGCTGCGAGGAGAACAAGAAGTGCTGCTGGACAGGATGTGGGACTTCCTGCCAAATCCCAGACGAGAAACCCGGGTCCTGCCCAAATGTGGACGTGCCCATCCCGCCTCTGGGTCTTTGCAAAACCATGTGTAATATGGATTCGGACTGTTCAGGGACGATGAAATGCTGCAAAAATGGCTGCGGGCATATGACTTGTACATCGGCCAAGCCCTGA	MTLRRGSCPLLLFSLVGLLTTRAQEPGENTTAAAEKAGTCPRAELEMPNRNCTEECQSDAGCEENKKCCWTGCGTSCQIPDEKPGSCPNVDVPIPPLGLCKTMCNMDSDCSGTMKCCKNGCGHMTCTSAKP	RecName: Full=Waprin-Phi1; Flags: Precursor [Philodryas olfersii]	A7X4K1.1	85.82

## Sheet: C. VIRIDISSIMUM
Table S2. Identification and annotation of transcripts of putative toxins from the venom glands of Philodryadini snakes.
Chlorosoma viridissimum
Toxin group	Sequence code	Annotation	Nucleotide sequence	Amino acid sequence	BLAST identification	Accession number	Identity %
5' nucleotidase (NUCL)	SB0559_CVIRNUCL001	Putative percursor of snake venom 5' nucleotidase	ATGCAGACCCCGAGGCGAGGGCGCGGGGCTCAGGGTTGCCCTGGAAGCGCCCCTTCGGCGACGCGGCGGCTCCTGGTCGGAGCCGTCTGGGTTTGCGCCGCGCTCTCGGCTGCCGCCGGCTCCTTCGAGCTCACCATTCTGCATACCAACGACGTCCACGCTCGCGTAGAGGAAACCAGCCGAGACGCGGGCAAATGCGGCGGGCAGGACTGCTACGGTGGCGTCGCGCGTCGGGCTGCCAAGATCCAAGAGATCCGCGCCTCGCATCGCCACGTGTTGCTCCTGGACGCCGGGGATCAGTACCAGGGCACCATCTGGTTCAGCTACTACAAAGGGCGCGAAGTGGTGCAATTCATGAATATCCTGCGCTACGACGCGATGGCTCTAGGAAATCATGAA…	MQTPRRGRGAQGCPGSAPSATRRLLVGAVWVCAALSAAAGSFELTILHTNDVHARVEETSRDAGKCGGQDCYGGVARRAAKIQEIRASHRHVLLLDAGDQYQGTIWFSYYKGREVVQFMNILRYDAMALGNHEFDNGLDGLLDPLLKHVKFPILSANIRPKGPIASNISGYILPYKIINVGSEKVGIIGYTTKETPVLSNPGPYLEFRDEVEELQIQANKLTTLGVNKIIALGHSGFKEDRRIAQKVKGVDVVVGGHTNTFLYTGSPPSNEVAAGNYPFMELSDDGRQVPVVQAYAFGKYLGYLNVVFDDKGNVMKASGNPILLNKDIPEDPAVKAEVNKMSIQLKNYSSQEIGKTIVYLNGTTHACRFQECNLGNLICDAVVYNNLRHPDDDEWNHVS…	5' nucleotidase, partial [Spilotes sulphureus]	AXL95273.1	90.48
Acetylcholinesterase (AChE)	SB0559_CVIRAChE001	Putative percursor of snake venom Acetylcholinesterase	ATGATGCATACCGATGGGATGTGGAACCACACAAAAATTATCATGTGGTTTCTTCTGTTCTGTATGTTTGTCAAGAAGGTGTTCTCTGCTGGAGATGACACCATCATTGCTACTAAGAATGGAATGGTCAAAGGTATTGATTTACCTGTGCTTGGTGGAACAGTAACTGCATTTCTTGGGATTCCTTTTGCAACACCACCTATTGGTACACTCCGTTTCAAAAAGCCAGAATCTCGAGAGGAATGGAAAGGAATTTGGGATGCCACCAAGTTTGCCAACTCTTGCTTCCAACTCCTAGATAATGCTTTCCCTGGCTTTGAAGGGTCAGAGATGTGGAATCCAAACACAAAACTTAGTGAAGACTGCCTTTATCTCAATGTATGGGTTCCTTCTCCCAAG…	MMHTDGMWNHTKIIMWFLLFCMFVKKVFSAGDDTIIATKNGMVKGIDLPVLGGTVTAFLGIPFATPPIGTLRFKKPESREEWKGIWDATKFANSCFQLLDNAFPGFEGSEMWNPNTKLSEDCLYLNVWVPSPKPKNASVMVWIYGGGFYSGTSSLSVYDGKFLARVERVIVVSMNYRLGLFGFLALPGNEDAPGNVGLFDQRLALQWIHDNIGAFGGNSKSVTLFGESAGAVSVGFHLLSPQSYPLFTRAIMQSGSGNAPWGAILPSEARKRTLVLAELLHCTGKNETEIIFCLQNKEPQELLEKGEAVLMYTGLINLQFCPIVDGEFLDDMPEILLKKGHFKQTQILIGANKNEGTIILVYGGAPGFSKDNNSVINETEFQAGLKLAFPQLNEMGLES…	cholinesterase [Pantherophis guttatus]	XP_034294938.1	93.47
C-type Lectin (CTL)	SB0559_CVIRCTL0010	Putative percursor of snake venom C-type lectin	ATGGGGCGATTCATCTTTGTGAACCTGGGCTTGCTGGTTGTGGCTTTCTCCCTAAGGGGATCTGGAGCAGATTGTCCCTCTGGTTGGTCCTCCTATGATAAGTATTGTTACAAGGTCTTTGATGAACGCAAGAATTGGGACGAAGCAGAGAGGTTCTGCGGGGAGCAGAAGACGGGCAGCCACCTGGCCTCCATCCTTAGCAGCGAAGAAGGATCGTTCGTGGCCAATCTGGCCTTCAAACGTTTGAAGAACCCTTCTATGTGGATCGGACTGAGTAATATATGGAATCAATGCAGTTGGCAGTGGAGTGATGGCTCCAGCCTCGGTTACGAAGCCTGGGTTGAAGGACCCGATTGTGTTATGATGCGTTTAAAGCCAGGTTTTATCGACTGGTACAGT…	MGRFIFVNLGLLVVAFSLRGSGADCPSGWSSYDKYCYKVFDERKNWDEAERFCGEQKTGSHLASILSSEEGSFVANLAFKRLKNPSMWIGLSNIWNQCSWQWSDGSSLGYEAWVEGPDCVMMRLKPGFIDWYSVECKSTLPFTCKFLAKREDSAPE	c-type lectin-like protein precursor beta subunit [Philodryas chamissonis]	AJB84507.1	94.23
	SB0559_CVIRCTL006	Putative percursor of snake venom C-type lectin	ATGGGGCGATTCATCTTTGTGAGTCTCGGCTTGCTGGTTCTGGCTTTTTCCCTGAGTGGAATTGGAGCCGATCAACATTGTCCCTCTGGTTGGTCCTTCCACAATGTGTCTTGCTACAAGTTCTTTGACGACTGGATGACCTGGGATGAAGCGCAGAGGTTCTGCATGGACGAGCAGGAAAACGGCCAACTCGCCTCCATCAAAGATCTAGAAGAGTCAGTGAAGTTGTCCTCCCTGATCTCCAAAGCAAGGAGTATTTTTGATGTCTGGATTGGATTGAGGTTTTCAAAGAGAAAAGGCATCTGGGAGTGGATTGATGGCTCCAACGTGACCCAGACACGCTGGGAAGAAGGAAAACCCAAGGTTTTGAAGAAGGAGTTCTGTGCTGTACTGACAGCC…	MGRFIFVSLGLLVLAFSLSGIGADQHCPSGWSFHNVSCYKFFDDWMTWDEAQRFCMDEQENGQLASIKDLEESVKLSSLISKARSIFDVWIGLRFSKRKGIWEWIDGSNVTQTRWEEGKPKVLKKEFCAVLTARSHYLKWNNTNCRDWHPFVCKFQPRREASGC	RecName: Full=C-type lectin lectoxin-Phi1; Short=CTL; Flags: Precursor [Philodryas olfersii]	A7X406.1	80.13
	SB0559_CVIRCTL004	Putative percursor of snake venom C-type lectin	ATGGAGCGATTCATCTTTGGAGTCTTGCTGGCTGTGGCCCTCTCCCTGAGTGGAACTGGAGCTGATCCCCAATGTCCATCCGGTTGGTACTCCTATAATGGGCATTGCTACAAAGTCTTCAAACTATTGAAGAGCTGGAGCGATGCAGAGATGTTCTGCAGACGAGAGAAGGAAGGGGGCCATCTCGTCTCCATCCAAAGCAAGCCAGAGGCAGCTTTCGTGGCCAAGGTGGTCTCTTCAGGGAAACAACACATCTGGAGGTGGAGTGATGGCTTCAGCTTCCGCTACCAATTCTGGGCACTAGGAAAACCCAACAACTTTCTTTGGAACAAGTACTGCATTGTGCTGTCGAGCCTGTTAGAGTATCTTCGAGTATCTAAGAGTTGCGGATCCAAGCAT…	MERFIFGVLLAVALSLSGTGADPQCPSGWYSYNGHCYKVFKLLKSWSDAEMFCRREKEGGHLVSIQSKPEAAFVAKVVSSGKQHIWRWSDGFSFRYQFWALGKPNNFLWNKYCIVLSSLLEYLRVSKSCGSKHYFICEFQPQGEGSTW	RecName: Full=C-type lectin lectoxin-Lio1; Short=CTL; Flags: Precursor [Erythrolamprus poecilogyrus]	A7X3Z4.1	61.96
	SB0559_CVIRCTL003	Putative percursor of snake venom C-type lectin	ATGGGGCGATTCATCTTTGTGAACCTGGGCTTGCTGGTTGTGGCTTTCTCCTTAAGGGGATCTGAAGCTTGTTGTCCCTGCGGTTGGTCCTCCTATGATAAGTATTGCTACAAGGCCTTTGATAAACGCAAGAATTGGGACGATGCCGAGAGGTTCTGCATGGAGCAGGGGAAAGGCGGCCATCTGGCTTCTCTCGGAAGCATTGAAGAGGGAAAATTTGTGGGCAAACTCACCTTTAAAAAATTAAAGGAACAACCGACCCATGTCTGGATTGGACTGAGGGCTCAAGGCCAAGGACAGCAATGCAGCTCGAGGTGGAGTGATGGCTCCAGGATCGGTTATGAAAACTGGCATCCATTACAATCCAAAAAATGTATTGCGTTGTCAAAATGGACGGAG…	MGRFIFVNLGLLVVAFSLRGSEACCPCGWSSYDKYCYKAFDKRKNWDDAERFCMEQGKGGHLASLGSIEEGKFVGKLTFKKLKEQPTHVWIGLRAQGQGQQCSSRWSDGSRIGYENWHPLQSKKCIALSKWTEYLKWYNHICEFTLPFICKFLAEPDDPE	RecName: Full=Snaclec subunit A; AltName: Full=C-type lectin subunit A; Flags: Precursor [Philodryas olfersii]	Q09GJ8.1	94.38
	SB0559_CVIRCTL002	Putative percursor of snake venom C-type lectin	ATGGAGCGATTCATCTTTGGAATCTTGCTGGCTGTGGCCCTCTCCCTGAGTGGAACTGGAGCTGATCCCCAATGTCCCTCCAGTTGGTACTCCTATAATGGGCATTGCTACAAAGTCTTCAAACTATTCAAGAGCTGGAGAGATGCAGAGATGTTCTGCAGACGAGAGAAGGAAGGGGGCCATCTCGTCTCCATCCAAAGCAAGCCAGAGGCAGCTTTCGTGGCCAAGGTGGTCTCTTCAGGGAAACAACGCATCTGGAGGTGGAGTGATGGCTTCAGCTTCCGCTACCAATTCTGGGCACTAGGAAAACCCAACAACTTTCTTTGGAACAAGTACTGCATTGTGCTGTCGAGCCTGTTAGAGTATCTTCGAGTATCTAAGAGTTGCGGATCCAAGCAT…	MERFIFGILLAVALSLSGTGADPQCPSSWYSYNGHCYKVFKLFKSWRDAEMFCRREKEGGHLVSIQSKPEAAFVAKVVSSGKQRIWRWSDGFSFRYQFWALGKPNNFLWNKYCIVLSSLLEYLRVSKSCGSKHYFICEFQPQGEGSTW	RecName: Full=C-type lectin lectoxin-Lio1; Short=CTL; Flags: Precursor [Erythrolamprus poecilogyrus]	A7X3Z4.1	61.35
	SB0559_CVIRCTL001	Putative percursor of snake venom C-type lectin	ATGGGGCGATTCATCTTTGTGAGTCTCGGCTTGCTGGTTCTGGCTTTTTCCCTGAGTGGAATTGGAGCCGATCAACATTGTCCCTTTGGTTGGTTCTCCCACAATGTGTCTTGCTACAAGCTCATCAATGATTGGAAGACCTGGGACGAAGCGCAGAGGTTCTGCATGGATGAGCAGGAAAACGGCCAACTCGCCTCCATCAACGATGTGGGAGAGTCAGTGAAGTTGTCCGACGAGATCTCCAAAACATGGAGTATTTTTGATGTCTGGATTGGATTGAGGTTTTCAAAGAGAAAAGGCATCTGGGAGTGGATTGATGGCTCCAACGTGACCCACACACGCTGGGAAGAAGGAAAACCCAACGTTTTGAAGAAGGAGTTCTGTGCTGCACTGACATTC…	MGRFIFVSLGLLVLAFSLSGIGADQHCPFGWFSHNVSCYKLINDWKTWDEAQRFCMDEQENGQLASINDVGESVKLSDEISKTWSIFDVWIGLRFSKRKGIWEWIDGSNVTHTRWEEGKPNVLKKEFCAALTFRSHYLKLNGKDCSRGHRFLCKFQPRREASG	RecName: Full=C-type lectin lectoxin-Phi1; Short=CTL; Flags: Precursor [Philodryas olfersii]	A7X406.1	89.74
C-type Natriuretic Peptide (CNP)	SB0559_CVIRCNP001	Putative percursor of snake venom C-type Natriuretic Peptide	ATGTTCGCCTCCCGTCTGGCGGCCGGCGGGCTGCTCTTGCTGGCCCTGCTGGCCCTGGCCCTCGACGGCAAGCCGGCGCCCCCGCAGCCGCTGCGCAAGCCTCCGGCGGGCGGCACGACGGCGTTGCGGCGGGAGCTGACGGAGCAGCCGGAGGGGTCGTCGGGTCCCGCGGCTGGCGGAGGAGGAGGAGGAAGCGGCCGCAGCGGCTCCAAAGCGGGCAACGCAGCCCCGACGGCACCGAAGAGCAAAGGGGCGGCGGCGGCGGCGGCGGCGGCGGCGGCGCGGCTGATGCGGGATTTGCGCCCCGACAGCAAGCAGGCGCGGGCCGCCTGGGGCCGGATGGTGCACCCCGAGCACCACGCAGGAGGCGGCGGCGGCGGTGGCGGTGGAGGCGGCGGG…	MFASRLAAGGLLLLALLALALDGKPAPPQPLRKPPAGGTTALRRELTEQPEGSSGPAAGGGGGGSGRSGSKAGNAAPTAPKSKGAAAAAAAAAARLMRDLRPDSKQARAAWGRMVHPEHHAGGGGGGGGGGGGGASRRLKGVAKKGLGKGCFGLKLDRIGSMSGLGC	natriuretic peptide precursor [Philodryas chamissonis]	AJB84508.1	92.22
Cystatin-C (CYS)	SB0559_CVIRCYS002	Putative percursor of snake venom Cystatin-C	ATGGCGGCGTCGTGGTGGGTGCCTTTGGTGTGCGGCTGGCTCTTGCTCAGTTGCGCCTGCCCGGAGGCGCTCGGGACCAGGCTCCTCGGGGGACTGGAGGAGGCTTCCCCGGAGGAACCGGGCGTCCGTAAGGCCCTTCAGTTTGCCATGAACGAATACAACAGTGGAAGCAACGATATGTATCATAGTCGCGTGTCCGATGTGCTCCGAGCCCAAAAACAGATTGTCAGCGGAATTAAGTATTACTTCACAGTTAAGATTGGACGTACTGTTTGCCGTAAGGGAGCATCTGACCTTGAAAATTGTGCATTTCATAGCACACCTAAACTGGCACAGACAATGACTTGCACCTTTGAGGTTTACGATATTCCTTGGATAAAGAGGATTTCCCTGGAAAAA…	MAASWWVPLVCGWLLLSCACPEALGTRLLGGLEEASPEEPGVRKALQFAMNEYNSGSNDMYHSRVSDVLRAQKQIVSGIKYYFTVKIGRTVCRKGASDLENCAFHSTPKLAQTMTCTFEVYDIPWIKRISLEKSSCT	cystatin-2 [Crotalus tigris]	XP_039185234.1	86.44
	SB0559_CVIRCYS001	Putative percursor of snake venom Cystatin-C	ATGGTGCACTCCCGGCGGCCGATCCCGGCTGCCCTCGGCCTGCTCTGCGCCCTCCTGGGGCTGCTGCTGCTGCTGCCCTCGGGGGTGCCGGCGATGATCCCCGGGGGGCTTTCCCCCAGATCCGTCACGGACCCGGACGTGCAGCGAGCCGCCGCCTTCGCCGTGGAAGTATACAACGCGCGCAGCTCAAACGCCAACTACTTCAAGGACTTGCGCGTTGTGGACGCGCAGTCCCAGGTAGTCGCAGGGGTGAAATATTATCTGACGATGGAGTTGGCGAAAACCAAGTGCGAAAAGACCGCCGGCAAACTGAAGGTGTACAAAGAGATCCAGAACTGTGAACTCCCTCCAGGGGCTCAGCAGGAGAAACTAACTTGCGACTTCCAAATCTGGAGTCGT…	MVHSRRPIPAALGLLCALLGLLLLLPSGVPAMIPGGLSPRSVTDPDVQRAAAFAVEVYNARSSNANYFKDLRVVDAQSQVVAGVKYYLTMELAKTKCEKTAGKLKVYKEIQNCELPPGAQQEKLTCDFQIWSRPWLEKMELTKMSCN	RecName: Full=Cystatin; Flags: Precursor [Naja kaouthia]	E3P6P4.1	83.62
Cysteine-rich secretory protein (CRISP)	SB0559_CVIRCRISP001	Putative percursor of snake venom Cysteine-rich secretory protein	ATGATTGTCTTCATCTTGCTAAGTCTTGCTGCAGTGCTGCAACAGTCTTTTGGACTTGTTGATTTTAATTCTGAGTCACCCAGGAGACCAGAAATACAAAGGGTGATTGTTGACACGCACAATTCTTACAGAAGATCTGTCAGTCCAACTGCTAGCAACATGCTAAAAATGGAATGGTATGCTGAAGCTGCTGCAAATGCAGAACGTTGGGCGTCTCGATGTATTTATGATCACAGCCAAAATTCTGACAGAGTTCTTGATGGAATACAATGTGGTGAAAATATATACAAGTCAAGTAATCCCAGGGCATGGACTGAAATAATGCAGTTGTGGTATGATGAATACAAAAATTTTGACTTTGGCTATGGAGCAAACCCACCAGGTTCTGTTATTGGCCAT…	MIVFILLSLAAVLQQSFGLVDFNSESPRRPEIQRVIVDTHNSYRRSVSPTASNMLKMEWYAEAAANAERWASRCIYDHSQNSDRVLDGIQCGENIYKSSNPRAWTEIMQLWYDEYKNFDFGYGANPPGSVIGHYTQIVWYKSYRIGCAAYYCPSSRYNYFYVCQYCPAGNFAGRTATPYNSGPTCGDCPSACDNGLCTNPCTEKNEFTNCNDLVQDSSCQDDWIKTNCAATCFCKNEII	RecName: Full=Cysteine-rich venom protein; Short=CRVP; AltName: Full=CRISP-PHI1; AltName: Full=CRISP-PHI2; AltName: Full=Cysteine-rich secretory protein; Flags: Precursor [Philodryas olfersii]	Q09GJ9.1	94.56
Ku-wap-fusin protein (KUWAP)	SB0559_CVIRKUWAP002	Putative percursor of snake venom Ku-wap-fusin protein	ATGTGGGCCAGGGTCCTTCTCCTGGGGGTGCTTCTCTCCCTCCTTGCTGACCTCCATGCTGCCAGTGGTGGAGATGCTGGGGGTCAAAAGAGCTGGAATCCTCGGAACAGTGTCTGCCACTTCCCTAAAGACCCAGGTCCCTGTGACAACCTACGTCGTCACTGGTACTATGACTCAAGTTCCAACAGATGCAAACGTTTCTACTATGGAGGTTGCTATGGGAATGCTAACAATTTCAAGGACCTCAACGAATGTCAGCGCTGCTGTGTCATCTCAGATTTGAACAAGGCTGGCATCTGTCCCAAGCCAATTAGTCCCAAGGACAAAATTTGTGGCAAATTCTGCTCCAGCGATGTCAGATGCCCTGGCAATGAGCGCTGCTGTCCAACTTCTTGTGGA…	MWARVLLLGVLLSLLADLHAASGGDAGGQKSWNPRNSVCHFPKDPGPCDNLRRHWYYDSSSNRCKRFYYGGCYGNANNFKDLNECQRCCVISDLNKAGICPKPISPKDKICGKFCSSDVRCPGNERCCPTSCGQQCKYPEGDDWGYCPVMIHPPNKRENPLCFRNCTRDQECNVGFTFPREKCCPFGDGNLCVAIVEEHPGVCPLRVEVQPFVPCKDTCDDDHDCPLTEKCCFTGCSRGCLPSVRSDRCQLPQDQGSCSKELQRFYYDPEKKTCISFVYRGCEGNSNNFETKELCEKACGKISKEVCKLPADSGPCEGYSKQYYYNWKTKNCETFVYGLCGGNDNRFSTKLECQIVCHEFGQMQSSTA	papilin-like [Pseudonaja textilis]	XP_026580479.1	69.53
Phospholipase A2 inhibitor (iPLA)	SB0559_CVIRiPLA001	Putative percursor of snake venom Phospholipase A2 inhibitor	ATGAAGCATCTTCTTATTTTCACTGCTTTGATAACTACAGCAACTGCTGCTGACCTGATATGCACATGTTCTGCGCCAACGATTGGACCAGAGTGCACCGCGGAAAATACTTGTAGTATCCCAAAGGGACAATGTTATTCAATTCTGAGGCAAATTGCTGCTGAGAAAGATAAGTCAGTCGATGGTGGAGCAAGTAAAGGCTGCCAAGAAGACAAAGATGCTAAGGTCTGCAATGAAGGGGTTGTGTTCATTTCAACTGAGAATGTTTTTTATCTGCTGAGCAATGTTACATGCTGTGACAAAAATGAATGCAACAAAGATGTCATTGTAGAACTTCCAAAAGTTTCAACCCTTAAGACTCTTTCCAGCAAAAAGCTGGTTTGCCCATCATGCTTTACT…	MKHLLIFTALITTATAADLICTCSAPTIGPECTAENTCSIPKGQCYSILRQIAAEKDKSVDGGASKGCQEDKDAKVCNEGVVFISTENVFYLLSNVTCCDKNECNKDVIVELPKVSTLKTLSSKKLVCPSCFTLGKKQCDAKQMNCSESQDKCFTIIGTITKGGTAPQDFIAKGCAAQSAILKNGTTLAFGDASYKLDNVEVVEAKGGVSQISSCLSFAILLPSVLWFLLDSSLY	phospholipase A2 inhibitor and Ly6/PLAUR domain-containing protein-like [Notechis scutatus]	XP_026537221.1	62.61
Phospholipase B (PLB)	SB0559_CVIRPLB001	Putative percursor of snake venom Phospholipase B	ATGGTCCGCCACGGCATCGCCTCCTCCTCCTCCTCGGACAATCGCCGCCTGCGATGCTGGAGCTGGTACTGGGGGGGACTTTTACTTCTCTGGGCCATGGCAGAAACTCGAGCAGATCTCCACTATGCTACTGTATATTGGTTGGAAGCTGAAAAATCTTTTCAAGTTAGGGATGTATTAGACAAAAATGGCGATGCTTATGGCTATTACAATGACACTGTACAATCTACTGGATGGGGGATACTTGAGATCAAAGCAGGCTACGGTAATCAGCCCATAAGCAATGAAATACTCATGTACGCTGCAGGTTTCTTGGAAGGCTACCTCACTGCTTCACGTATGAGTGACCATATTGCAAATCTATATCATCAGCTGATTAAGAATGTCATCATTGAACAA…	MVRHGIASSSSSDNRRLRCWSWYWGGLLLLWAMAETRADLHYATVYWLEAEKSFQVRDVLDKNGDAYGYYNDTVQSTGWGILEIKAGYGNQPISNEILMYAAGFLEGYLTASRMSDHIANLYHQLIKNVIIEQKVKDFMQKQDEWTRQQIKNNKDDPFWRNAGYIIAQLDGLYMGNVEWAKRQKRTPLTDFEISFLNAIGDLLDLIPALISDSRNNDFLSMREISRMYQWDMGHCSALIKVLPGYENIYFAHSSWFTYAATLRIYKHWDFRITDPQTKIGRASFSSYPGFLVSLDDFYILGSGLIMLQTTNSVFNLSLLKQVVPESLFAWERVRIANMMADSGKSWAQIFEKENSGTYNNQYMILDTKKIKLQRSIDDGTLYIIEQVPNLVKYSDQTDI…	phospholipase B, partial [Spilotes sulphureus]	AXL95274.1	94.23
Snake Venom Acid Lipase (SVLIPA)	SB0559_CVIRSVLIPA002	Putative percursor of snake venom Acid Lipase	ATGTGGCTGCTAATAATTGCAGTGAGCTTATTCCAAGGCCTGGTAAATTCATCAGTGCTTGAGAGAAGAAAAAGAGGTGTGGATCCAGAAACATCCATGAACATTAGTGAAATTATTTTATTCAGAGGATATCCCAGTGAGGAATATGAGGTGGTGACAGATGATGGGTATTTCCTAAGTATTAATAGAATTCCTTATGGAAAAATAAGTCAGAAAACCAAGGAACGGAGACCAGCTGTGTTTCTGCAACATGGCTTTCTTGCTGATGGCAGTAACTGGGTGACCAACCTAGACTACAACAGCCTGGGTTTTGTGCTAGCTGACGCTGGTTTTGATGTTTGGTTAGGGAACAGCAGAGGAAACACTTGGTCCCGAAAACACACCAACTATACCACAAAG…	MWLLIIAVSLFQGLVNSSVLERRKRGVDPETSMNISEIILFRGYPSEEYEVVTDDGYFLSINRIPYGKISQKTKERRPAVFLQHGFLADGSNWVTNLDYNSLGFVLADAGFDVWLGNSRGNTWSRKHTNYTTKQKEFWMFSFDEMAKYDLPASINFVLNKTGQEQLFYVGHSQGSTIGFIAFSAFPELAKKINMFFGLAPVMNTMFSSGALAKLGELPELLLKEIFGTKEFFPQNALIKWLATQVCDHVLLDDLCGNFFFLLCGFNEKNLNMSRVDVYSTHCPAGTSVQNMLHWRQVVKSGEMRAFDWGSRKENMDHYNQPTPPPYKMKGMLVPTAIWTGGHDFLADKKDVAILITMIPNLIYHKEIPDWEHLDFIWGLDAPQRMFRDMIQMMRKAQYAH	putative lysosomal acid lipase/cholesteryl ester hydrolase [Pseudonaja textilis]	XP_026566277.1	90.75
Snake venom Endogenous Matrix-Metalloproteinase 9 (seMMP-9)	SB0559_CVIRSeMMP022	Putative percursor of snake venom endogenous matrix-metalloproteinase-9	ATGAGACTCCCAGTCCCGGCCTCCCTCCTCCTCCTGGCGCTCCTGCCGCTGCCCTGTCCGTGGGCCGCCCCGACGGAAGGGAAGGGCCCCGTAGTCATCACCTTCCCCGGGGACGCCGTCAGCCACCTGACGGACCGGGAGCTGGCCGCCCGCTACCTCCAGCGTTACGGGTACCTGACCACGACCAACCCCGGGGGGCAGGTGCAGCTGGAGACCCCCCTCAAGGCCATGCAGAAACAGCTGGGCTTGCCGGAAACAGGGGAGCTGGACGCCCCCACCCTCACGGCCATGCGAGCGCCCCGCTGCGGAGTCCCGGACGTGGGTCGCTTCCAGACCTTCGAGGGCGACCTCAAGTGGGACCACACGGACATCACTTACCGGGTGGTCAACTATTCCCCT…	MRLPVPASLLLLALLPLPCPWAAPTEGKGPVVITFPGDAVSHLTDRELAARYLQRYGYLTTTNPGGQVQLETPLKAMQKQLGLPETGELDAPTLTAMRAPRCGVPDVGRFQTFEGDLKWDHTDITYRVVNYSPDLDGSVIEDAFVRAFQVWSDVTPLTFTRRQEGEVDILIQFGTGEHGDGYPFDGSDGLLAHAFPPGKDRFSGDAHFDDDEFWTLGTGLVVKTHFGNADGALCHFPFTFEGKSYSSCTTEGREDGLPWCATTSDYDQDKTYGFCPSELLFTYDGNSNGEKCVFPFVFEGKSYQGCTTDGRTDGYRWCATTANYDQDKKYGFCPNRDTAVVGGNSQGEPCSFPFKFLGQTYSSCTTEGRDDGRLWCATTSDFDADKKWGFCPDQGYSLF…	matrix metalloproteinase-9 [Pantherophis guttatus]	XP_034280049.1	85.25
	SB0559_CVIRSeMMP018	Putative percursor of snake venom endogenous matrix-metalloproteinase-9	ATGAGACTCCCAGTCCCGGCCTCCCTCCTCCTCCTGGCGCTCCTGCCGCTGCCCTGTCCGTGGGCCGCCCCGACGGAAGGGAAGGGCCCCGTAGTCATCACCTTCCCCGGGGACGCCGTCAGCCACCTGACGGACCGGGAGCTGGCCGCCCGCTACCTCCAGCGTTACGGGTACCTGACCACGACCAACCCCGGGGGGCAGGTGGAGCTGGAGACCCCCCTCAAGGCCATGCAGAAACAGCTGGGCTTGCCGGAAACAGGGGAGCTGGACGCCCCCACCCTCACGGCCATGCGAGCGCCCCGCTGCGGAGTCCCGGACGTGGGTCGCTTCAAGATCTACGGGGACAACTTCAAGTGGGACCACAATGACCTCACTTACCGGGTGGTCAACCATTCCCCT…	MRLPVPASLLLLALLPLPCPWAAPTEGKGPVVITFPGDAVSHLTDRELAARYLQRYGYLTTTNPGGQVELETPLKAMQKQLGLPETGELDAPTLTAMRAPRCGVPDVGRFKIYGDNFKWDHNDLTYRVVNHSPDLDVSIIEDAFVRAFQVWSEVVPLTFTHQQEGEVDILIQFGTGNHGDNYPFDGKYGVLAHAFHPGQGPISGDAHFDEDELWTLGTGVVVKTHFGNANGALCHFPFIYGGKSYSSCTTEGREDGLPWCATTPSYDQDNTYGFCPSELLFTYDGNSNGEKCVFPFVFEGKSYQGCTTDGRTDGYRWCATTANYDQDKKYGFCPNRDMTVIGGNSQGEHCSFPFKFLGRMYSSCTTYGRKEGRPWCATTSDYDADQKWGFCPDQGFSLF…	matrix metalloproteinase-9 [Pantherophis guttatus]	XP_034280049.1	77.65
	SB0559_CVIRSeMMP011	Putative percursor of snake venom endogenous matrix-metalloproteinase-9	ATGAGACTCCCAGTCCCGGCCTCCCTCCTTCTCCTGGCGCTCCTGCCGCTGCCCTGTCCGTGGGCCGCCCCGACGGAAGGGAAGGGCCCCGTAGTCATCACCTTCCCCGGGGACGCCGTCAGCCACCTGACGGACCGGGAGCTGGCCGCCCGCTACCTCCAGCGTTACGGGTACCTGACCACGACCAACCCCGGGGGGCAGGTGCAGCTGGAGACCCCCCTCAAGGCCATGCAGAAACAGCTGGGCTTGCCGGAAACAGGGGAGCTGGACGCCCCCACCCTCACGGCCATGCGAGCGCCCCGCTGCGGAGTCCCGGACGTGGGTCGCTTCAAGATCTACGGGGACAACTTCAAGTGGGACCACAATGACCTCACTTACCGGGTGGTCAACCATTCCCCT…	MRLPVPASLLLLALLPLPCPWAAPTEGKGPVVITFPGDAVSHLTDRELAARYLQRYGYLTTTNPGGQVQLETPLKAMQKQLGLPETGELDAPTLTAMRAPRCGVPDVGRFKIYGDNFKWDHNDLTYRVVNHSPDLDVSIIEDAFVRAFQVWSDVVPLTFTHQQEGEVDILIQFGTGNHGDNYPFDGKYGVLAHAFHPGQGPISGDAHFDEDELWTLGTGVVVKTHFGNANGALCHFPFIYGGKSYSSCTTEGREDGLPWCATTPSYDQDNTYGFCPSELLFTYDGNSNGEKCVFPFVFEGKSYQGCTTDGRTDGYRWCATTANYDQDKKYGFCPNRDTAVVGGNSQGEPCSFPFKFLGQTYSSCTTEGRDDGRLWCATTSDFDADKKWGFCPDQGYSLF…	matrix metalloproteinase-9 [Pantherophis guttatus]	XP_034280049.1	82.27
Snake Venom Metalloproteinase P-III Class (SVMP P-III)	SB0559_CVIRSVMPIII010	Putative percursor of snake venom metalloproteinase P-III Class	ATGATCCAAGTTCTCTTGGTTACTATATACTTAGTGGTTTTTCCATATCAAGGGAGCTCTATAATCCTGGAATCCGGGAATGTTAATGATTATGAAGTAGTATATCCACAAAAAGTGCCTGTATTGCCCAAAGGAGGACTTCAGAATGCTGAGCCAGAGACCGAGTATGAAGATACAATGCAATATGAATTTCAAGTGAATGGAGAGCCAGTGGTCCTTCACCTAGAAAGAAATAAAGGACTTTTTTCGGAAGATTACAGTGAAACTCATTATTCCCCTGATGGCAGAGAAATTACAACAAGCCCTCCAGTTCAGAATCACTGCTATTATCATGGACGCATCCAGAATGAAGCTGACTCAACTGCAGTCATCAGTGCATGTGACGGCTTGAAAGGACAT…	MIQVLLVTIYLVVFPYQGSSIILESGNVNDYEVVYPQKVPVLPKGGLQNAEPETEYEDTMQYEFQVNGEPVVLHLERNKGLFSEDYSETHYSPDGREITTSPPVQNHCYYHGRIQNEADSTAVISACDGLKGHFKHQGETYFIEPLKLSNSEAHVVYKYDSLEKEDETHKSCGVTHTTWELDEPIEKISQVSITPKEQNTYLNAKKYIEFFIAVDNGMFRKYSRDLTAIKTRVYEIVNTVNMICRALNIHVALIGLEIWSNQDQINVQSNEHVTLDLFGEWRKTNLLPRKRNDNAQLLTSIDFNGPTIGYGYVGTICHPKESSAVVQDHSDLTSMVASTMAHEMGHNLGIHHDTNACHCNSNGCVMSPSIGSVPQYQFSSCSIQEHQSYLTRAQPQCIL…	venom metalloprotease precursor [Philodryas chamissonis]	AJB84503.1	86.20
	SB0559_CVIRSVMPIII008	Putative percursor of snake venom metalloproteinase P-III Class	ATGATCCAAGTTCTCTTGGTTACTATATACTTAGTGGTTTTTCCATATCAAGGGAGCTCTATAATCCTGGAATCTGGGAATGTTAATGATTATGAAGTAGTATATCCACAAAAAGTGCCTGTATTGCCCAAAGGAGGACTTCAGAATGCTGAGCCAGAGACCGAGTATGAAGATACAATGCAATATGAATTTCAAGTGAATGGAGAGCCAGTGGTCCTTCACCTAGAAAGAAATAAAGGACTTTTTTCGGAAGATTACAGTGAAACTCATTATTCCCCTGATGGCAGAGAAATTACAACAAGCCCTCCAGTTCAGAATCACTGCTATTATCATGGACACATCCAGAATGAAGCTGACTCAACTGCAGTCATCAGTGCATGTGACGGTTTGAAAGGACAT…	MIQVLLVTIYLVVFPYQGSSIILESGNVNDYEVVYPQKVPVLPKGGLQNAEPETEYEDTMQYEFQVNGEPVVLHLERNKGLFSEDYSETHYSPDGREITTSPPVQNHCYYHGHIQNEADSTAVISACDGLKGHFKHQGETYFIEALKLSNSEAHAVYKYDSLEKEDETHKTCGVTQTAWELDEPIEKISQVSITPKEQNTYLNAKKYIEFFIAVDNGMFRKYSSDLTAIRTRVYEIVNIVNTIYRALNTHVALIGLEIWSNRDQINVQSASNVTLDLFGEWRKTNLIPRKRNDNAQLITSTDFDGPTVGLGYVGTLCQLKRSSAIVQDHSDLTSLMASTMAHELGHNLGINHDTNACHCSSNACVMFPTIGSVPQYQFSSCSIEQHERYLTRAQPQCIL…	venom metalloprotease precursor [Philodryas chamissonis]	AJB84503.1	90.03
	SB0559_CVIRSVMPIII006	Putative percursor of snake venom metalloproteinase P-III Class	ATGATCCAAGCTCTCTTGGTAACTATAAGCTTAGTAGTTTTTCCATATCAAGGGAGCTCTATAAAACTGGAATCCGGGAATGTTAATGATTATGAAGTAGTGTATCCACAAAAAGTGTCTGCATTGCCCAAAGGAGGACTTCAGAATGCTGAGCCAGAGAGCAAGTATGAAGATGCAATGCAATTTGAATTTCAAGTGAATGGAGAGCCAGTGGTCCTTCACCTAGAAAGAAATAAAGGACTTTTTTCGGAAGATTACAGTGAAACTCATTATTCCCCTGATGGCAGAGAAATTACAACAAGCCCTCCAGTTCAGGATCACTGCTATTATCATGGGCACGTCCAGAATGAAGCTGACTCAACTGCAGTCATCAGTGCATGTGACGGCTTGAAAGGACAT…	MIQALLVTISLVVFPYQGSSIKLESGNVNDYEVVYPQKVSALPKGGLQNAEPESKYEDAMQFEFQVNGEPVVLHLERNKGLFSEDYSETHYSPDGREITTSPPVQDHCYYHGHVQNEADSTAVISACDGLKGHFKHQGETYFIEPLKLSNSEAHAVYKYDSLEKEDETHKTCGVTQTAWELDEPIEKISQVSITPKEQNTYLNAKKYIEFFIAVDNGMFRKYSSDLTAIRTRVYEIVNIVNTIYRALNTHVALIGLEIWSNRDQINVQSASNVTLDLFGEWRKTNLIPRKRNDNAQLITSTDFDGSTVGLGYVGTLCQLKHSSAIVQDHSDLTSLMASTMAHELGHNLGINHDTNACHCSSNACVMFPTIGSVPLYQFSSCSIEQHERYLTRAQPQCIL…	venom metalloprotease precursor [Philodryas chamissonis]	AJB84503.1	89.71
	SB0559_CVIRSVMPIII002	Putative percursor of snake venom metalloproteinase P-III Class	ATGATCCAAGCTCTCTTGGTAACTATATGCTTAGTGGTTTTTCCATATCAAGGGAGCTCTACAATTCTGAAATCCGGAAAAGTTAAAGATTATGAAGTAGTGTATCCACAAAAAGTCCTTCCATTGTCTACAAGAGGAACTGAGTGGCGTGAGGAAAAGATCAAATATGAAGACACCATGAAATATGAATTTAAAGTGAATGGAGAGCCAGTGGTCCTTAACCTAGAAAAAAATAAACAACTTTTTTCCAAAGATTACACTGAGACTCATTATTCCCCTGATGGCAGAGAAATTACAACAAACCCTCAGGTTGAGGATCACTGCTATTATCATGGTTACGTTCAGAATGATGCCGACTCAACTGCAGTCATCAGTGCATGTGACGGCTTGAATGGGTAT…	MIQALLVTICLVVFPYQGSSTILKSGKVKDYEVVYPQKVLPLSTRGTEWREEKIKYEDTMKYEFKVNGEPVVLNLEKNKQLFSKDYTETHYSPDGREITTNPQVEDHCYYHGYVQNDADSTAVISACDGLNGYFKNNGEMYLIEPLKPSDNEVHAVYKYESLEKEDETPKTCGAIHSSGKSDEPTKKTSKIFSTPEEKKEYLESKKYVELYIVADNLIFRKYDRNITTIRTRVSEILNNVNMFYKPLNIHVALIGLEIWSDEDKIVISASSESTVISFAAWRYVDLLPRKKNDNAQLLTGINFDEGILGLAFIGGMCNYLESVGAIQDNNYRAILTASILTHELGHNLGMPHDTDSCTCNTGLCIMKPRLDFSPPRQFSPCSLWDFENFVLREDAQCIL…	metalloproteinase [Dispholidus typus]	QGC85372.1	76.25
	SB0559_CVIRSVMPIII009	Putative percursor of snake venom metalloproteinase P-III Class	ATGATCCAAGTTCTCTTGGTTACTATATACTTAGTGGTTTTTCCATATCAAGGGAGCTCTATAATCCTGGAATCTGGGAATGTTAATGATTATGAAGTAGTATATCCACAAAAAGTGCCTGTATTGCCCAAAGGAGGACTTCAGAATGCTGAGCCAGAGACCGAGTATGAAGATACAATGCAATATGAATTTCAAGTGAATGGAGAGCCAGTGGTCCTTCACCTAGAAAGAAATAAAGGACTTTTTTCGGAAGATTACAGTGAAACTCATTATTCCCCTGATGGCAGAGAAATTACAACAAGCCCTCCAGTTCAGAATCACTGCTATTATCATGGACACATCCAGAATGAAGCTGACTCAACTGCAGTCATCAGTGCATGTGACGGTTTGAAAGGACAT…	MIQVLLVTIYLVVFPYQGSSIILESGNVNDYEVVYPQKVPVLPKGGLQNAEPETEYEDTMQYEFQVNGEPVVLHLERNKGLFSEDYSETHYSPDGREITTSPPVQNHCYYHGHIQNEADSTAVISACDGLKGHFKHQGETYFIEALKLSNSEAHAVYKYDSLEKEDETHKTCGVTQTAWELDEPIEKISQGSITPEEQNTYLNAKKYIEFFIVVDNGMFRKYSRNLTAIRTRVYEIVNTLNTVYRALNIHVALIGVEFWSNRDKINVQSAANVTLDLFGTWRETDLLPRRNHDNAQLLTSTDFNGPTVGLGYVGTFCRPKHSSAIVQDHSDLTSIMASTMAHEMGHNLGINHDTNACHCSSNACVMSPSIGSVPQYQFSSCSIEQHERYLTRAQPQCIL…	snake venom metalloprotease [Philodryas olfersii]	ACS74987.1	89.92
	SB0559_CVIRSVMPIII007	Putative percursor of snake venom metalloproteinase P-III Class	ATGATCCAAGTTCTCTTGGTTACTATATACTTAGTGGTTTTTCCATATCAAGGGAGCTCTATAATCCTGGAATCCGGGAATGTTAATGATTATGAAGTAGTATATCCACAAAAAGTGCCTGTATTGCCCAAAGGAGGACTTCAGAATGCTGAGCCAGAGACCGAGTATGAAGATACAATGCAATATGAATTTCAAGTGAATGGAGAGCCAGTGGTCCTTCACCTAGAAAGAAATAAAGGACTTTTTTCGGAAGATTACAGTGAAACTCATTATTCCCCTGATGGCAGAGAAATTACAACAAGCCCTCCAGTTCAGAATCACTGCTATTATCATGGACACATCCAGAATGAAGCTGACTCAACTGCAGTCATCAGTGCATGTGACGGTTTGAAAGGACAT…	MIQVLLVTIYLVVFPYQGSSIILESGNVNDYEVVYPQKVPVLPKGGLQNAEPETEYEDTMQYEFQVNGEPVVLHLERNKGLFSEDYSETHYSPDGREITTSPPVQNHCYYHGHIQNEADSTAVISACDGLKGHFKHQGETYFIEALKLSNSEAHAVYKYENVEKEDETHKTCGVTQTAWELDEPIEKISQGSITPEEQNTYLNAKKYIEFFIVVDNGMFRKYSSNLTAIRTRVYEIVNTLNTVYRALNIHVALIGVEFWSNRDKINVQSAANVTLDLFGTWRETDLLPRRNHDNAQLLTSTDFNGPTVGLGYVGTFCRPKHSSAIVQDHSDLTSIMASTMAHEMGHNLGINHDTNACHCSSNACVMSPSIGSVPQYQFSSCSIEQHERYLTRAQPQCIL…	venom metalloprotease precursor [Philodryas chamissonis]	AJB84503.1	88.07
	SB0559_CVIRSVMPIII004	Putative percursor of snake venom metalloproteinase P-III Class	ATGATCCAAGCTCTCTTGGTCACTATATGCTTAGTGGTTTTTCTATATCAAGGGAGTTCTATAATCCTGGAATCCGGGAATGTTAATGATTATGAAGTAGTGTATCCACAAAAAGTGCCTGTATTGCCCAAAGGAGGACTTCAGAATGCTGAGCCAGAGACTGAGTATGAAGATGCAATGCAATTTGAATTTCAAGTGAATGGAGAGCCAGTGGTCCTTCATCTAGAAAGAAATAAAGGACTTTTTTCGGAAGATTACAGTGAAACTTATTATTCTCCTGATGGCAGAGAAATTACAACCACCCCTCCAGTTCAGAATCACTGCTATTATCATGGACACATCCAGAATGAAGCTGACTCAACTGCAGTCATCAGTGCATGCAATGGTTTGAAAGGACAT…	MIQALLVTICLVVFLYQGSSIILESGNVNDYEVVYPQKVPVLPKGGLQNAEPETEYEDAMQFEFQVNGEPVVLHLERNKGLFSEDYSETYYSPDGREITTTPPVQNHCYYHGHIQNEADSTAVISACNGLKGHFKHQGETYFIEPLKLSNSEAHAVYQYDSLEKEDETHKTCGVTQTTWELDEPIEKISQVSITPEEQNAYLNAQKYIEFFIVVDNRMFRKCSSNFTVIRTRVYEIVNTLNMIYGALKIHVALIGLEIWSNGDQINITSNSSVTLELFGGWREKDLIPRKRNDYAQLITDIIFDEETLGEAYMASLCQSRRSVAVVQYYSNRTSIMATIMAHELGHNLGMDHDTNYCYCNFIQCIMFPSISVEPSYWFTDCSIQEHRRYLTKHHPQCIL…	venom metalloprotease precursor [Philodryas chamissonis]	AJB84503.1	77.24
	SB0559_CVIRSVSP002	Putative percursor of snake venom serinoproteinase	ATGGCATTGATCGGAGTGCTAGCAAACCTTCTGATACTATGCCTTTCTTACGCAATAACCCCTCCTAATCGGATCATTGGAGGCTTGGAATGTAACCAAAGTGAACATCGTTCCCTTGCACTCTTGTATAACTCTGCAGGGATTTTCTGCTCTGGGACTTTGCTTAACCACGAATGGGTGCTCACCGCTGCACACTGCAACAGACAAAACTTCCAGATAAAGCTTGGTGTGCATAACTTACGTGTACCCAATGAGGATGAGCAGATAAGAGTCCCGAAGGACAAGGTGTGTTGTCTCAGTACCAGGAACTGTACCCAAATGAACCAGGACATCATGTTAATCAGGCTGAACAGTTCTGTTAACTATAGTAGACGCATCGCACCACTCAGCTTGCCCTCC…	MALIGVLANLLILCLSYAITPPNRIIGGLECNQSEHRSLALLYNSAGIFCSGTLLNHEWVLTAAHCNRQNFQIKLGVHNLRVPNEDEQIRVPKDKVCCLSTRNCTQMNQDIMLIRLNSSVNYSRRIAPLSLPSNRPRVGLVCRVMGWGTITSPEVTFPEVPHCVNIQILHKEVCEAAYPIVERYNHVLCAGELEGEKDSCGGDSGGPLICNGPIQGIVSWGRFPCALVLEPGVYTKVFDYIDWIQDIMAGNANLICPGDNF	RecName: Full=Snake venom serine protease; Short=SVSP; Flags: Precursor [Philodryas olfersii]	Q09GK1.1	85.06
Three-Finger Toxin (3FTX)	SB0559_CVIR3FTx005	Putative percursor of snake venom Three-finger toxin	ATGAAAACTCTGCTGCTGTCCTTGGTGGTGGTGGCATTCGTGTACCTGCACTCAGGACACACCATTAAATGTCACACTTGCAAGAACAAGTTTTGTATTCGCTCTCAGGATTGTCCAAATGCAACGGCATGCTATAAATCGAGCTCTAATCTATTGGAATCGAAGCCCCGCAGGGGATGTGCTGGTGGTTGCTTTCTTCCGGCAGCCGGTGAGAAAACTGTATATTGTACAAAAGACAACTGCAACCAGTAG	MKTLLLSLVVVAFVYLHSGHTIKCHTCKNKFCIRSQDCPNATACYKSSSNLLESKPRRGCAGGCFLPAAGEKTVYCTKDNCNQ	three-finger toxin [Helicops leopardinus]	UMW88048.1	55.42
	SB0559_CVIR3FTx001	Putative percursor of snake venom Three-finger toxin	ATGAAAACTCTGCTGCTGTCCTTGGTGGTGGTGGCATTCATGTTCCTGGACTCAGGACACACCATTGAATGTTGCTCTGAACCACTTTGTATGACTTTTCAGAATTGTCCAAATGCAACGGCATGTTATATAAAGAGATCTGGTCTATTGGGATCGAATATTGAAAGGGGATGTGTTACTAATTACACTAATCCGGCACCCGGTGACGCAATTCAATATTGCGCAAAAGACAAGTGCAACTTGTAG	MKTLLLSLVVVAFMFLDSGHTIECCSEPLCMTFQNCPNATACYIKRSGLLGSNIERGCVTNYTNPAPGDAIQYCAKDKCNL	three-finger toxin [Helicops leopardinus]	UMW88048.1	63.41
Vascular Endothelial Growth Factor (VEGF)	SB0559_CVIRVEGF003	Putative percursor of snake venom vascular endothelial growth factor	ATGAACTTTCTGCTCACTTGGATCCACTGGGGGTTGGCGGCGCTGCTTTATTTCCACAACGCCAAGGTGTTGCAGGCTGCTCCTGCCCAGGGGGATGGAGAGAGGCAACAAGGTGAAGTTATCTCATTTATGAAGGTCTATGAGCGCAGTGCCTGCAGGGTAATTGAGACCATGGTAGATATTTTCCAGGAGTATCCTGATGAGGTGGAATACATCTTCAAGCCATCATGTGTGGCCCTGATGAGATGTGGAGGATGCTGTAATGATGAAGCACTAGAATGTGTGCCTACAGAGGTGTACAATGTCACAATGGAGATCATGAAACTCAAACACTTTCAGAGCCAGCATATACATCCGATGAGCTTCCTGCAGCACAGTAGATGTGAATGCAGACCAAAG…	MNFLLTWIHWGLAALLYFHNAKVLQAAPAQGDGERQQGEVISFMKVYERSACRVIETMVDIFQEYPDEVEYIFKPSCVALMRCGGCCNDEALECVPTEVYNVTMEIMKLKHFQSQHIHPMSFLQHSRCECRPKKEIRIRQENHCEPCSERRKHLYKQDPLTCKCSCKFTDSRCKSKQLELNERTCRCEKPRR	vascular endothelial growth factor 1, partial [Borikenophis portoricensis]	AXL96597.1	96.88
	SB0559_CVIRVEGF001	Putative percursor of snake venom vascular endothelial growth factor	ATGAACTTTCTGCTCACTTGGATCCACTGGGGGTTGGCGGCGCTGCTTTATTTCCACAACGCCAAGGTGTTGCAGGCTGCTCCTGCCCAGGGGGATGGAGAGAGGCAACAAGGTGAAGTTATCTCATTTATGAAGGTCTATGAGCGCAGTGCCTGCAGGGTAATTGAGACCATGGTAGATATTTTCCAGGAGTATCCTGATGAGGTGGAATACATCTTCAAGCCATCATGTGTGGCCCTGATGAGATGTGGAGGATGCTGTAATGATGAAGCACTAGAATGTGTGCCTACAGAGGTGTACAATGTCACAATGGAGATCATGAAACTCAAACACTTTCAGAGCCAGCATATACATCCGATGAGCTTCCTGCAGCACAGTAGATGTGAATGCAGACCAAAG…	MNFLLTWIHWGLAALLYFHNAKVLQAAPAQGDGERQQGEVISFMKVYERSACRVIETMVDIFQEYPDEVEYIFKPSCVALMRCGGCCNDEALECVPTEVYNVTMEIMKLKHFQSQHIHPMSFLQHSRCECRPKKEIRIRQEKKSKRGKGKGQKRKRKRGRYKPQNFHCEPCSERRKHLYKQDPLTCKCSCKFTDSRCKSKQLELNERTCRCEKPRR	vascular endothelial growth factor A isoform X1 [Thamnophis elegans]	XP_032072240.1	94.44
Waprin Protein (WAP)	SB0559_CVIRWAP002	Putative percursor of snake venom Waprin protein	ATGACGCTCAGGAGAGGCAGCTGCCCACTCCTCCTCTTCTCCCTGGTGGGTCTTCTCACGACCTGTGCTCAGGAGCCTGATGCGGCTGGACAGAACACCACAGCGGTCGCAGAGAAAGCTGGCACCTGTCCCCAGGCAGAGTTGGAGATGCCCAATAGGAACTGCACGGAGGAATGCCAGTCCGACGCCGGCTGCGAGGAGAACAAGAAGTGCTGCTGGACAGGATGTGGGACTTCCTGCCAAATCCCAGACGAGAAACCCGGGTCCTGCCCAAATGTGGACGTGCCCATCCCGCCTCTGGGTCTTTGCAAAACCATGTGTAGTAAGGATTCAGACTGTTCAGGGACGATGAAATGCTGCAGAAATGGCTGCGGGCATATGACTTGTACAACGGCCAAG…	MTLRRGSCPLLLFSLVGLLTTCAQEPDAAGQNTTAVAEKAGTCPQAELEMPNRNCTEECQSDAGCEENKKCCWTGCGTSCQIPDEKPGSCPNVDVPIPPLGLCKTMCSKDSDCSGTMKCCRNGCGHMTCTTAKP	RecName: Full=Waprin-Phi1; Flags: Precursor [Philodryas olfersii]	A7X4K1.1	92.54

## Sheet: X. ARGENTEUS
Table S2. Identification and annotation of transcripts of putative toxins from the venom glands of Philodryadini snakes.
Xenoxybelis argenteus
Toxin group	Sequence code	Annotation	Nucleotide sequence	Amino acid sequence	BLAST identification	Accession number	Identity %
Acetylcholinesterase (AChE)	SB1590_XARGAChE001	Putative percursor of snake venom Acetylcholinesterase	ATGCCTTGTCTGCTATGCCCGTCTCTCTTGTGCTGCCTTCTCTTCCTCCTCCCCTTTTCATTAGCCTCCAATTCTGCTTCTAATGGGGACACAGTGGTCCTAACCAGCAGTGGCCCTATTAAGGGCAAGCAGTTTCTGTCTGGTCTTGGACCTGTGACTGCCTATCTAGGCATTCCTTATGCTCAGCCTCCCCTGGGGAAGTTACGTTTCCAGAAACCTCTCCCACATCAGCCATGGAATCAAACATTGGAAGCCACCAGTTTTGGCAATTCCTGTCCTCAATTTATTTCCCGGGATGCCCCTGAAGCAGATATATGGTCTCCTAAAACACCATTGTCAGAAGATTGCCTTTTCCTCAACATTTGGGTGCCACATCGACAAACTTCTTCACCAGTGCCA…	MPCLLCPSLLCCLLFLLPFSLASNSASNGDTVVLTSSGPIKGKQFLSGLGPVTAYLGIPYAQPPLGKLRFQKPLPHQPWNQTLEATSFGNSCPQFISRDAPEADIWSPKTPLSEDCLFLNIWVPHRQTSSPVPVLVWIHGGSYAFGTSSVDIFNGTHLAATENVIVVTINYRLGALGFLYLPRAAPGNLGLWDQQLALKWVKENAAAFGGDPSRVTVLGHSAGGSCANLHLLSPKSQDLFAQMVIQSGTANAYWALRTPEEAKRLSLEFVHLLGCSEDNNVSIVHCLQTKNVSELIQQEIAMSFKGVLADFPFRPIIDGEFLLGDPAKLMEEGQIQVKPVLIGITSDEAATYVQYLFSNITHNLINQEQLLKGIQLLVPNATEDFIRTIALKYSEGQHG…	cholinesterase-like [Pantherophis guttatus]	XP_034277495.1	88.29
	SB1590_XARGAChE002	Putative percursor of snake venom Acetylcholinesterase	ATGCCTTGTCTGCTATGCCCATCTCTCTTGTGCTGCCTCCTCCTCCTCTTTCCATTAGCCTCCGGTTCTGCTTCTAAAGGGGACACAGTGGTCGTAACCAGCAGTGGCCCTATTAAGGGCAAACAGTTCCTATCTGGCCTTGGATCTGTGACAGCCTATCTAGGCATTCCTTATGCTGAGTCTCCCCTGAGGAAGTTGCGTTTCCAGAAACCTCTCCCACATCATCCATGGAGTCAAACATTGGAAGCCACCAGTTTTGGTAATTCCTGTCCTCAATTTATTTCCCGGGATGTCCCTGAAGCAGATATATGGTCTCCTAAAACACCATTGTCAGAAGATTGCCTTTCCCTCAACATCTGGGTGCCACATCCACAACCTCCTTCACCAGTGCCAGTTTTG…	MPCLLCPSLLCCLLLLFPLASGSASKGDTVVVTSSGPIKGKQFLSGLGSVTAYLGIPYAESPLRKLRFQKPLPHHPWSQTLEATSFGNSCPQFISRDVPEADIWSPKTPLSEDCLSLNIWVPHPQPPSPVPVLVWIHGGSYAFGTSSVDIFNGTHLAATENVIVVTINYRLGALGFLYLPPAAPGNLGLWDQQLALKWIKENAAAFGGDPSRVTVLGHSSGGSCANLHLLAPKSQDLFAQMVIQSGTANAYWALRTPEEAKQKSLEFVRLLGCSKDNNISIMHCLHTKNVSELIQQEIAMSFKGVLADFPFRPIIDGEFLLGDPAKLMEEGKIQVKPVLIGTTSDEAATYVHYIFSNITHNLINQEQLLKGIQLLVPNATEDFIRTIAMRYSEGQHGPT…	cholinesterase-like isoform X1 [Pantherophis guttatus]	XP_034277491.1	88.11
C-type Lectin (CTL)	SB1590_XARGCTL001	Putative percursor of snake venom C-type lectin	ATGGGGCGATTAATCTTTGTGAACCTGGGCTTGCTGGTTGTGGCTTTCTCCCTAAGGGGATCTGGAGCAGATTGTCCCTCTGGTTGGTCCTCCTATGATAAGTATTGTTACAAGGTCTTTGATGAACGCAAGAATTGGGACGAAGCAGAGAGGTTCTGCGTGGAACAGAAGACAGGCAGCCACCTGGCCTCCATCCTTAGCAGTGAAGAAGGAGCTTTCGTGGCCAATCTGGCCTTCAAACGTTTGAAGCACCCTTCTATGTGGATCGGACTGAGTAACATATGGAATCAATGCAGCTGGCAGTGGAGTGATGGCTCCAGCCTCGGTTACGAAGCCCGGGTTGAAGGACCCGATTGTGTTATGATGCGTTTACAGCCAGGTTATATCGACTGGTACAAT…	MGRLIFVNLGLLVVAFSLRGSGADCPSGWSSYDKYCYKVFDERKNWDEAERFCVEQKTGSHLASILSSEEGAFVANLAFKRLKHPSMWIGLSNIWNQCSWQWSDGSSLGYEARVEGPDCVMMRLQPGYIDWYNVECKSTLPFTCKFLAKREDPAPE	RecName: Full=Snaclec subunit B; AltName: Full=C-type lectin subunit B; Flags: Precursor [Philodryas olfersii]	Q09GK0.1	93.59
	SB1590_XARGCTL002	Putative percursor of snake venom C-type lectin	ATGGAGCGATTCATCTTTGGAGTCTTGCTGGCTGTGGCCCTCTCCCTGAGTGGAACTGGAGCTGAACCCCAATGTCCCTCCGGTTGGTCCTCCTGTAATGGACAATGCTACAAAGTCTTCAAACTATTCAAAAGCTGGGACGATGCAGAGATGTTCTGCAGTCGAGAGGAGGAAGGGGGGCATCTCGCCTCCATCCAAAGCAAGCCAGAGGCATCTTTCGTGGCCAAGCTGGTCTCCCGCTATGCCTTCTTTTTGAACGTCTGGATCGGGCTGAGTGCTTCACGGAATCAACGCACCTGGGGGTGGAGTGATGGCTCCAGCTTCCGCTACCAATCCTGGGCACTAGGAGAACCCAACAACTTTCTTTGGAACGAGTACTGCGTTACGCTGTCGAGCCTG…	MERFIFGVLLAVALSLSGTGAEPQCPSGWSSCNGQCYKVFKLFKSWDDAEMFCSREEEGGHLASIQSKPEASFVAKLVSRYAFFLNVWIGLSASRNQRTWGWSDGSSFRYQSWALGEPNNFLWNEYCVTLSSLSGYRRWNDQNCGIKRYFICKFQPQGEGSTW	RecName: Full=C-type lectin lectoxin-Lio1; Short=CTL; Flags: Precursor [Erythrolamprus poecilogyrus]	A7X3Z4.1	71.17
	SB1590_XARGCTL003	Putative percursor of snake venom C-type lectin	ATGGCCCCTTTCCGCCTTGGCCTCTTGGTCTGCCTGGTGCTTGTCCCCTTCGCAGCCAATGGCCAGGCGGCCCCCTGCCCCAGCGGCTGGCTCTCCTACAACGGCCACTGCTACGGCTACTTCCAGCAGGAGGTGAACTGGCAACAGGCTGAGGACTTCTGCCAACGCCACAGTGGCCACCTGGCCTCCCTCCAGACCCGTGAAGAGCACCTGGCTGTGGCCGACTTCCTGACCAAGGCTCAGTGGTGGGAGCGCGAGGACGTCTGGCTGGGATTCTTCCTCCCCTCCAACAGCCGGAGCTGGGCCTGGGTGGACGGCAGCCCCGTGGGCTACACCGCCTGGGAAAAGCACTACCGCCGGTCCTGGAAGAAATGTGCCGCCCTGGATGACTCTTCCGGG…	MAPFRLGLLVCLVLVPFAANGQAAPCPSGWLSYNGHCYGYFQQEVNWQQAEDFCQRHSGHLASLQTREEHLAVADFLTKAQWWEREDVWLGFFLPSNSRSWAWVDGSPVGYTAWEKHYRRSWKKCAALDDSSGFMLWDDDSCYDRNPFLCKSLAAAAPPQAPQGGQP	rheacalcin-1-like [Pantherophis guttatus]	XP_034285960.1	87.43
	SB1590_XARGCTL004	Putative percursor of snake venom C-type lectin	ATGGGGCGATTCATCCTTCTGACCCTCGGCTTGCTGGTCGTGGCTTTCTCCCTTAATGGAATCGGAGCTGATCACCCTTGCCCCACGGACTGGTCCTCCTTTGAGCACTTTTGCTACAAGATCTTCAAACAACGGAAGACCTGGGAAGAGGCAGAGACGTCCTGCGGCCAAGAGCAGAATGGCAGCCATCTCATCTCCATCCAAAGCTGGGCAGAGTCAGATTACGCGGCCAAGCTGGCCTCCAGAAATGTGCTCTTCTCCAATGTCTGGATCGGACTGAAGGATGCGGAGAAAAATGGCACTTGGAGTGATGGCTCCGGCTTCGGTTACACATCCTGGCAAATGAGGCACTTTCACCCTGGGGATGATAAGGGGTTCTGCGCTGTGCTATCCAGGCGG…	MGRFILLTLGLLVVAFSLNGIGADHPCPTDWSSFEHFCYKIFKQRKTWEEAETSCGQEQNGSHLISIQSWAESDYAAKLASRNVLFSNVWIGLKDAEKNGTWSDGSGFGYTSWQMRHFHPGDDKGFCAVLSRRSGYLGWKNVNCESKNFFICKLQPKSDGST	RecName: Full=C-type lectin lectoxin-Lei1; Short=CTL; Flags: Precursor [Leioheterodon madagascariensis]	A7X401.1	62.18
	SB1590_XARGCTL005	Putative percursor of snake venom C-type lectin	ATGAGGCGATTCATCTTTCTGACCCTCGGCTTGCTGGTCATGGCTTTGTCCCTTAATGGAGCCAAAGGTAGTTGTTGTCCCCATGATTGGCTGCCCATGAACAAGTTTTGCTACAAGGTCTTCGATGACCACAAGAACTGGAATGACGCCGAGATGTTCTGCAGGAAATACAAGCCAGGCTGCCACCTCGCTTCCATCCATGACAGTGAAGAGTCAGATGACTTGTCCGAATATGTTTCCGACTATCTCAAAAGTGGTGGAAATGTCTGGATTGGATACAGTGACTCACAGAAACAAGGCAATTGGGAGTGGACAGACAGATCCAATAACAGGTACCTGATGTGGAAGCAAGGAGAGCCCAACAACAATGGGAACAATGAATATTGTGTTGAGCTTTGG…	MRRFIFLTLGLLVMALSLNGAKGSCCPHDWLPMNKFCYKVFDDHKNWNDAEMFCRKYKPGCHLASIHDSEESDDLSEYVSDYLKSGGNVWIGYSDSQKQGNWEWTDRSNNRYLMWKQGEPNNNGNNEYCVELWSLSGYKNWNDENCASTRAYLCQCRF	C-type lectin 3, partial [Ahaetulla prasina]	AXL96600.1	80.38
	SB1590_XARGCTL006	Putative percursor of snake venom C-type lectin	ATGGGGCGATTCATCTTTGTGAACCTGGGCTTGCTGGTCATGGCTTTCTCCCTAAGGGGATCTGAAGCTTGTTGTCCCTGCGGCTGGTCCTCCTATGATAAGTATTGCTACAAGGTCTTCGATAAACGCAAGAATTGGGACGATGCCGAGAGGTTCTGCATGGAGCAGGGGAAAAGTGGCCATCTGGCCTCTCTCGGAAGCATTGAAGAGGGAAAATTTGTGAGCAAACTCACCTTTAAGAAATTAAAGGAACACCCGTCCTATGTCTGGATCGGACTGAGGGCTCAAGGCCAAGGACAGCAATGCAGCTCGAGGTGGAGTGATGGCTCCAGGATAGTTTATGAAAACTGGCACCCATTACAATCCAGAAAATGCATTGCGTTGTCAAAATGGACGGAG…	MGRFIFVNLGLLVMAFSLRGSEACCPCGWSSYDKYCYKVFDKRKNWDDAERFCMEQGKSGHLASLGSIEEGKFVSKLTFKKLKEHPSYVWIGLRAQGQGQQCSSRWSDGSRIVYENWHPLQSRKCIALSKWTEYLKWYNHICDFTLPFICKFLAEPDDPE	RecName: Full=Snaclec subunit A; AltName: Full=C-type lectin subunit A; Flags: Precursor [Philodryas olfersii]	Q09GJ8.1	93.75
	SB1590_XARGCTL007	Putative percursor of snake venom C-type lectin	ATGCTTCTCATCACTTGCTTCATCTTTGGTCTCTTGGGCAGCCTTACCTGGGCAGGTCCACGTGGTCGGACTGTCTGCCCTTCTGGCACCTTTGCCTATAAAGACGGAAGCGAGTGGAATTGCTACAAGTTCTATGAAGATCAGTTCAACTTTGAAGAGGCTGAGGAAGAGTGTCAGTTCAAATGGAAAGGTCATTTAGCATCTTTCAGATCATACAAGCAGGCAAGATCCATTGGTGCCTATGTCACTAAAGAAAACAGAGAGGGTGATTATGTCTGGATTGGGCTCCAACGAGATATAAATTCTACTTTGACTAGTGGATGGCGCTGGAAGGATGGATCACGATCCAAGTTTACCAGGTGGAGCGTTGGTGAACCCAACAAACTGATTTGCAATGCG…	MLLITCFIFGLLGSLTWAGPRGRTVCPSGTFAYKDGSEWNCYKFYEDQFNFEEAEEECQFKWKGHLASFRSYKQARSIGAYVTKENREGDYVWIGLQRDINSTLTSGWRWKDGSRSKFTRWSVGEPNKLICNAACVGLSPPSGHLTWSDLDCSRELPFLCKWKLA	C-type lectin 3, partial [Spilotes sulphureus]	AXL95269.1	77.71
	SB1590_XARGCTL008	Putative percursor of snake venom C-type lectin	ATGGGGCGATTCATCTTTATGAGTCTCGGCTTGCTGGTTCTGGCTTTTTCCTTGAGTGGAATTGGAGCCGATCAACATTGTCCTTCTGGTTGGTCCTCCCACAATGTGTTTTGCTACAAGTTCTTCGACGACTGGATGACCTGGGACGAAGCGCAGAGGTTCTGCATGGAAGAGCAGGAAAACGGCCACCTTGCCTCCATCAAAGATCTAGAAGAGTCAGTGAAGTTGTCCTACCTGATCTCCAAAGCAAGGAATATCTTTGATGTCTGGATTGGATTGAGGCTTTCAAAGAGAAAAAGCATCTGGGAGTGGAGTGATGGCTCCAACGTGACCCAGACACGCTGGGAAGAAGGAGAACCCAAAGTTTTGAAGAAGGAGTTCTGTACTATACTGACATCC…	MGRFIFMSLGLLVLAFSLSGIGADQHCPSGWSSHNVFCYKFFDDWMTWDEAQRFCMEEQENGHLASIKDLEESVKLSYLISKARNIFDVWIGLRLSKRKSIWEWSDGSNVTQTRWEEGEPKVLKKEFCTILTSRSHYLKWNNTNCRDWHPFVCKFQLQREASGC	RecName: Full=C-type lectin lectoxin-Phi1; Short=CTL; Flags: Precursor [Philodryas olfersii]	A7X406.1	78.85
	SB1590_XARGCTL009	Putative percursor of snake venom C-type lectin	ATGGGATTCTTTATGTACATCGGCCTCTGTTGCCTTGGAATATTGATCACTAATCCTTTTTTGGGAGCCAAGGCTGCATCATGCCCCAGAGACTGGTTGCAGAAACAGGGGAACTGCTATGGATATTTTGATGACAGACTAACTTGGGATGATGCTGAGCTTGAGTGCCAAAGCCATGGCCCTGGATGTCATCTCGCCTCTGTCCTCAGCTTTCAAGAATCCTCATTGGTGTCTAAATATGTGAAAGACAAACAGGAATCATCTAGCCATGTCTGGATTGGAGCCAGTGATATGTCAGGGAAAAGGCGATGGAGGTGGGCTGACGAATCCACCTTCAATTACAAAGCCTGGAGAGCAGGCCAGCCAGACAACCATAGGAAGAATGAGCACTGTGTGGAG…	MGFFMYIGLCCLGILITNPFLGAKAASCPRDWLQKQGNCYGYFDDRLTWDDAELECQSHGPGCHLASVLSFQESSLVSKYVKDKQESSSHVWIGASDMSGKRRWRWADESTFNYKAWRAGQPDNHRKNEHCVELTNYSGFKLWNDNICDNLNAYICKYQL	C-type lectin BpLec-like [Pantherophis guttatus]	XP_034267484.1	85.62
	SB1590_XARGCTL010	Putative percursor of snake venom C-type lectin	ATGGGGCGATTCATCTTTGTGAGCCTCGGCTTGCTGGTTCTGGCTTTTTCCCTGAGTGGAATTGGAGCCGATCAACATTGTCCCTTTGGTTGGTTCTCCCACAATGTGTCTTGCTACAAGCTCATCAACGATTGGAAGACTTGGGACGAAGCGCAGAGGTTCTGCATGGAAAAGCAGGAAAACGGCCAACTCGCCTCCATCAACGATGTGGGAGAGTCAGTGAAGTTGTCCGACGAGATCTCCAAAACATGGAGTATCTTTGATGTCTGGATTGGATTGAGGCTTTCAAAGAGAAAAGGCATCTGGGAGTGGAGTGATGGCTCCAACGTGACCCACACACGCTGGGAAAAAGGAGAACCCAACAACCTTTTTAAGAAGGAGTTCTGTGTTGCACTGACA…	MGRFIFVSLGLLVLAFSLSGIGADQHCPFGWFSHNVSCYKLINDWKTWDEAQRFCMEKQENGQLASINDVGESVKLSDEISKTWSIFDVWIGLRLSKRKGIWEWSDGSNVTHTRWEKGEPNNLFKKEFCVALTAGSHYLKWNDKDCNRGHRFLCKFQPRRDASG	RecName: Full=C-type lectin lectoxin-Phi1; Short=CTL; Flags: Precursor [Philodryas olfersii]	A7X406.1	90.38
	SB1590_XARGCTL011	Putative percursor of snake venom C-type lectin	ATGCTTCTCATCACTTGCTTCATCTTTGGTCTCTTGGGCAGCCTTACCTGGGCAGGTCCTTATGGCCGGTCTGTCTGTCCTTCTGGCACCTTTGCCTATAAAGACGGAAGCGAGTGGAATTGCTACAAATTCTATGAAGATCCGCTCACCTTTGAAGATGCTGAGCAAGAGTGTCAGTTCAAATGGAAAGGTCATTTAGCATCTTTCAACTCGGAGAAGCAGGCAAAATCCCTTGGTGCCTATGTCACTAGAGAAAATGAGGAGAGTCTTTTTGTCTGGATTGGGCTCCGACGAGATGCAGGGTCCAGTATGAGTACTGGATGGCGCTGGGTTGATGGATCACGATCCAGGTACAGAAAGTGGACCTCTGGCCAACCCGACAATATAGACAAGATCCAG…	MLLITCFIFGLLGSLTWAGPYGRSVCPSGTFAYKDGSEWNCYKFYEDPLTFEDAEQECQFKWKGHLASFNSEKQAKSLGAYVTRENEESLFVWIGLRRDAGSSMSTGWRWVDGSRSRYRKWTSGQPDNIDKIQYCVGLNPSGHLTWNDLNCSYKHPFLCKWKPA	C-type lectin 7, partial [Borikenophis portoricensis]	AXL96591.1	77.58
	SB1590_XARGCTL012	Putative percursor of snake venom C-type lectin	ATGGCCCCTTTCCGCCTTGGCCTCTTGGTCTGCCTGGTGCTTGTCCCCTTCGCAGCCAATGGCCAAGTGGCCCCCTGCCCCAGCGGCTGGCTCTCCTACAACGGCCACTGCTACGGCTACTTCGAGCAGGAGGTGAACTGGCAACAGGCTGAGGACTTCTGCCAACGCTACAGTGGCCACCTGGCCTCCCTCCAGACCCGTGAAGAGCACCTGGCTGTGGCCGACTTCCTGACCAAGGCTCAGTGGTGGGAGCGCGAGGACGTCTGGCTGGGATTCTTCCTCCCCTCCAATAGCCGGAGCTGGGCCTGGGTGGACGGCAGCCCCGTGGGCTACACCGCCTGGGAAAAGCACTACCGCCGGTCCTGGAAGAACTGCGCCACCCTGGATGACTCTTCCGGA…	MAPFRLGLLVCLVLVPFAANGQVAPCPSGWLSYNGHCYGYFEQEVNWQQAEDFCQRYSGHLASLQTREEHLAVADFLTKAQWWEREDVWLGFFLPSNSRSWAWVDGSPVGYTAWEKHYRRSWKNCATLDDSSGFMLWDDDSCYDRNPFLCKSLAAAAPPQAPQGGQP	rheacalcin-1-like [Pantherophis guttatus]	XP_034285960.1	86.23
	SB1590_XARGCTL013	Putative percursor of snake venom C-type lectin	ATGGCCCCTTTCCGCCTTGGCCTCTTGGTCTGCCTGGTGCTTGTCCCCTTCGCAGCCAATGGCCAAGCGGCCCCCTGCCCCAGCGGCTGGCTCTCCTACAACGGCCACTGCTACGGCTACTTCGAGCGGGAGGTGAACTGGCAACAGGCTGAGGACTTCTGCCAACGCCACAGTGGCCACCTGGCCTCCCTCCAGACCCGTGAAGAGCACCTGGCTGTGGCCGACTTCCTGACCAAGGCTCAGTGGTGGGAGCGTGAGGACGTCTGGCTGGGATTCTTCCTCCCCTCCAACAGCCGGAGCTGGGCCTGGGTGGACGGCAGCCCCGTAGGCTACACCGCCTGGGAAAAGCACTACCGCCGGTCCTGGAAGAAATGTGCCGCCCTGGATGATTCTTCCGGG…	MAPFRLGLLVCLVLVPFAANGQAAPCPSGWLSYNGHCYGYFEREVNWQQAEDFCQRHSGHLASLQTREEHLAVADFLTKAQWWEREDVWLGFFLPSNSRSWAWVDGSPVGYTAWEKHYRRSWKKCAALDDSSGFMLWDDDSCYDENPFLCKSLAAAAPPQAPQGGQL	rheacalcin-1-like [Pantherophis guttatus]	XP_034285960.1	86.75
C-type Natriuretic Peptide (CNP)	SB1590_XARGCNP001	Putative percursor of snake venom C-type Natriuretic Peptide	ATGTTCGCCTCCCGTCTGGCGGCCGGCGGGCTGCTCTTGCTGGCCCTGCTGGCCCTGGCCCTCGACGGCAAGCCGGCGCCCCCGCAGCCGCTGCGCAAGGCTCCGTCGGGCGGCACGACGGCGTTGCGGCGGGAGCTGACGGAGCAGCCGGAGGGGTCCTCGGGTCCCGCGGCTGGAGGAGGAGGAGGCGGAGGCCGCAGCGGCTCCAAAGCGGCCAATGCAGCCCCGACGGCACCGAAGAGCAAAGGGGCGGCGGCAGCGGCGGCGGCGCGGCTGATGCGGGATTTGCGCCCCGACAGCAAGCAGGCGCGGGCCGCCTGGGGCCGGATGGTGCACCCCGAGCACCACGCGGGAGGCGGCGGCGGTGGAGGCGGCGGCGGCGGGGGCGCCTCGCGTCGT…	MFASRLAAGGLLLLALLALALDGKPAPPQPLRKAPSGGTTALRRELTEQPEGSSGPAAGGGGGGGRSGSKAANAAPTAPKSKGAAAAAAARLMRDLRPDSKQARAAWGRMVHPEHHAGGGGGGGGGGGGASRRLKGVAKKGLGKGCFGLKLDRIGSMSGLGC	natriuretic peptide precursor [Philodryas chamissonis]	AJB84508.1	94.55
Cysteine-rich secretory protein (CRISP)	SB1590_XARGCRISP001	Putative percursor of snake venom Cysteine-rich secretory protein	ATGATTGTCTTCATCTTGCTAAATCTTGCTGCAGTGCTGCAACAGTCTTTTGGACTTGTTGATTTTAATTCTGAGTCACCCAGGAGACCAGAAATACAAAGGGTGATTGTTGACACGCACAATTCTTACAGAAGATCTGTCAGTCCAACTGCTAGCAACATGCTAAAAATGGAATGGTATGCTGAAGCTGCTGCAAATGCTGAACGTTGGGCGTCTCTATGTACTTATGGTCACAGCCAAAATTCTGACAGAGTTCTTGATGGAATACAATGTGGTGAAAATATATACATGTCAAGTAATCCCAGGGCATGGACTGAAATAATGCAATTGTGGTATGATGAATACAAAAATTTTGACTTTGGCTATGGAGCAAACCCACCAGGTTCTGTTATTGGCCAT…	MIVFILLNLAAVLQQSFGLVDFNSESPRRPEIQRVIVDTHNSYRRSVSPTASNMLKMEWYAEAAANAERWASLCTYGHSQNSDRVLDGIQCGENIYMSSNPRAWTEIMQLWYDEYKNFDFGYGANPPGSVIGHYTQIVWYKSRLIGCAAYYCPSSLYNYFYVCQYCPAGNFAGRTATPYNSGPTCGDCPSACDNGLCTNPCLSQNKFTNCNELVQQSSCEDDWIKSNCAATCFCKNKII	RecName: Full=Cysteine-rich venom protein; Short=CRVP; AltName: Full=CRISP-PHI1; AltName: Full=CRISP-PHI2; AltName: Full=Cysteine-rich secretory protein; Flags: Precursor [Philodryas olfersii]	Q09GJ9.1	94.14
Ficolin (FICOLIN)	SB1590_XARGFICOLIN001	Putative percursor of snake venom Ficolin	ATGAAAACTTGGGCTGGTTTCCACCTGATTTTCCTGATTGCTAGTTCTGTGGAGGCTGAAGTCTCAAATTATGGCACTGGAGGACTCCAGGATGCTGAAGCCACTTGCTGTGCACAGCTGAAGGGCTTAACACAATGCGGAAGCGACAAGATTCTTCTTCAAGGTCAGGCTGGGATACCTGGAATTCCAGGTGTGCCAGGAACAAATGGATCACCAGGGCTAAAGGGTGACCCCGGTCCGCAGGGGCCCCCAGGTGAAAGAGGATCTGCTGGGATAACTGGAAAAGCTGGTCCGAAAGGAGACAAAGGAGACAAAGGAGGCAAAGGAGATTCCTGCAGCTTAGACAATTGTCAACCAAAAGAGAGAGAAGCCAGAAACTGCAAGGACCTCCTAGAATGT…	MKTWAGFHLIFLIASSVEAEVSNYGTGGLQDAEATCCAQLKGLTQCGSDKILLQGQAGIPGIPGVPGTNGSPGLKGDPGPQGPPGERGSAGITGKAGPKGDKGDKGGKGDSCSLDNCQPKEREARNCKDLLECGETLSGWYTIYPTKENPMMAFCDMGTDGGGWLQFQRRQDGSVDFYRDWESYKKGFGNQGSEFWLGNDKIHLLTSSGTQQLRIDLEDFNGSRTFAIYSSFRIANESENYKLTLGSYLDGNMGDSLSGHNDHAFSTKDRDNDIYNGNCATSFKGGWWYTNCHSSNLNGLYHKGKHTSYADGINWATGKGHYYSYKYADMKIRPQ	ryncolin-3-like isoform X3 [Thamnophis elegans]	XP_032076324.1	88.02
	SB1590_XARGFICOLIN002	Putative percursor of snake venom Ficolin	ATGAAAACTTGGGCTGGTTTCCACCTGATTTTCCTGATTGCTAGTTCTGTGGAGGCTGAAGTCTCAAATTATGGCACTGGAGGACTCCAGGATGCTGAAGCCACTTGCTGTGCACAGCTGAAGGGCTTAACACAATGCGGAAACCACAAGATTCTTCTTCAAGGTCAGGCTGGGATACCTGGAATTCCAGGTGTGCCAGGAACAAATGGATCACCAGGGCTAAAGGGTGACCCCGGTCCGCAGGGGCCCCCAGGTGAAAGAGGATCTGCTGGGATAACTGGAAAAGCTGGTCCGAAAGGAGACAAAGGAGACAAAGGAGGCAAAGAGAGAGAAGCCAGAAACTGCAAGGACCTCCTAGAATGTGGGGAGACCCTGAGTGGCTGGTATACAATCTACCCA…	MKTWAGFHLIFLIASSVEAEVSNYGTGGLQDAEATCCAQLKGLTQCGNHKILLQGQAGIPGIPGVPGTNGSPGLKGDPGPQGPPGERGSAGITGKAGPKGDKGDKGGKEREARNCKDLLECGETLSGWYTIYPTKENPMMAFCDMGTDGGGWLQFQRRQDGSVDFYRDWESYKKGFGNQGSEFWLGNDKIHLLTSSGTQQLRIDLEDFNGSRTFAIYSSFRIANESENYKLTLGSYLDGNMGDSLSGHNDHAFSTKDRDNDIYNGNCATSFKGGWWYTNCHSSNLNGLYHKGKHTSYADGINWATGKGHYYSYKYADMKIRPQ	ryncolin-3-like isoform X3 [Thamnophis elegans]	XP_032076324.1	86.71
	SB1590_XARGFICOLIN003	Putative percursor of snake venom Ficolin	ATGAGGAGATCTGGAGAGCAAGTGGGTCTCTTTCTGTTCTGCCTGATGATCGCAATCCATCGAGGGGCCTCCTTCCCAGAACTTAAGGAGCTGGGCCTGGATGGCAACGATACAATAGCCATTGTGCGAGGGAGTCCAGGCTTGCCAGGACCAAAAGGGCCACGTGGCCCTCCTGGTGTTCCAGGGGCCAAAGGAGAAAAAGGGGACCCAGGACAACCTGGAGAGAAAGGCGAGAAAGGCGACCCAGGAGAGTTTGACGAGAAGAAGCTGAAGGCGCTTCAGTGCAAGCAAGGTGCCCGAAACTGCAAAGAGCTCCTGAAAAGAGGGGAGATCCTGAGTGGCTGGTATATCATCTACCCCAAGGACTGCCAGCCTTTGAAGGTGCTGTGCGACATGGAC…	MRRSGEQVGLFLFCLMIAIHRGASFPELKELGLDGNDTIAIVRGSPGLPGPKGPRGPPGVPGAKGEKGDPGQPGEKGEKGDPGEFDEKKLKALQCKQGARNCKELLKRGEILSGWYIIYPKDCQPLKVLCDMDTDGGGWIVFQRRWDGSVDFFRDWAAYKRGFGNQLTEFWLGNDNLHLLTSLGKNELHVDLIDFNNEHSFAKYASFQVAAESDEYRLTLGAFTEGPAGDSLSNHNNMPFSTRDKQQDPKNFRCAETYKGAWWYNSCHYSNLNGRYWLGEHKTFADGINWRTGKGYNYSYKHSEMKIRPVD	ficolin-1-like [Thamnophis elegans]	XP_032089425.1	77.04
Kunitz-type protein (KUNZ)	SB1590_XARGKUNZ001	Putative percursor of snake venom Kunitz-type protein	ATGAGGCACGGAATGAGTCTGGCGCTTTTGATCACGTTGACGGCCGCTCTAGCGGCCGCAGAGTCGCCCCCAGACCGATGCCACTCGCCCAAGACAGTGGGCCCTTGTCGGGCATCCTTCCATCGGTGGTGGTACAATGCCACAAGTCAAACGTGCCAGGAATTCATTTTTGGGGGTTGCAAAGGCAGTGCCAACAACTTCTTCTCTGAACAGGACTGCTTCCAGACATGTTTCAGAGGTGGGGCTGCAGAGGCCACAGTGGTTCCTGGAGGGCCAGCCACTGAAGTGGCTACACCAAGAGCCGGAGGTTACCCAGAGGCCTACGAAAACAAGCCTGGCTTCAGAGAATTCTGTGCTGCGCCCCAGGTGGTAGGTCCCTGCCGGGCCTCCTTCCTCCGT…	MRHGMSLALLITLTAALAAAESPPDRCHSPKTVGPCRASFHRWWYNATSQTCQEFIFGGCKGSANNFFSEQDCFQTCFRGGAAEATVVPGGPATEVATPRAGGYPEAYENKPGFREFCAAPQVVGPCRASFLRWYFDLESRMCKMFVYGGCHGNKNNYLFQEHCLSQCTGDGEITEEPGNAGAHPRLPSEPFSFSTRAVVLAVLLAILMTILLGSMGVFFVKICRKNPDLSVGTVWSTLDDKEYLMSNAYTL	kunitz-type protease inhibitor 2 isoform X1 [Notechis scutatus]	XP_026543549.1	91.81
Natriuretic Peptide (NP)	SB1590_XARGCNP001	Putative percursor of snake venom Natriuretic Peptide	ATGTTCGCCTCCCGTCTGGCGGCCGGCGGGCTGCTCTTGCTGGCCCTGCTGGCCCTGGCCCTCGACGGCAAGCCGGCGCCCCCGCAGCCGCTGCGCAAGGCTCCGTCGGGCGGCACGACGGCGTTGCGGCGGGAGCTGACGGAGCAGCCGGAGGGGTCCTCGGGTCCCGCGGCTGGAGGAGGAGGAGGCGGAGGCCGCAGCGGCTCCAAAGCGGCCAATGCAGCCCCGACGGCACCGAAGAGCAAAGGGGCGGCGGCAGCGGCGGCGGCGCGGCTGATGCGGGATTTGCGCCCCGACAGCAAGCAGGCGCGGGCCGCCTGGGGCCGGATGGTGCACCCCGAGCACCACGCGGGAGGCGGCGGCGGTGGAGGCGGCGGCGGCGGGGGCGCCTCGCGTCGT…	MFASRLAAGGLLLLALLALALDGKPAPPQPLRKAPSGGTTALRRELTEQPEGSSGPAAGGGGGGGRSGSKAANAAPTAPKSKGAAAAAAARLMRDLRPDSKQARAAWGRMVHPEHHAGGGGGGGGGGGGASRRLKGVAKKGLGKGCFGLKLDRIGSMSGLGC	natriuretic peptide precursor [Philodryas chamissonis]	AJB84508.1	94.55
Phosphodiesterase (PDE)	SB1590_XARGPDE001	Putative percursor of snake venom Phosphodiesterase	ATGCATGTTGAAATCTTATCCAGAATGGTTTTTTTAGTAATAGTGCTCCTATTAAATGGAATAATTTGTTACTCCGATGGTAAATCTGTTAGCAAGTCAGAACCAAGATTACTTCTGGTGTCTTTTGATGGCTTCAGGGCTGATTATTTGAAGAAATATGAACTTCCACATCTCCAGGATTTTATTAAAGCTGGTGTATTAGTAGAGCATGTTACCAATGCTTTCATCACAAAAACTTTTCCAAACCACTACAGTATAGTCACAGGCTTGTATGAAGAAAGCCATGGTATTGTAGCAAATGAAATGTTTGACATTGATACAAAGAAAAATTTTTCACAGTTTAATGATACGGATCCTTTCTGGTGGGATGAAGCAATTCCTATATGGGTAAGCAATGAA…	MHVEILSRMVFLVIVLLLNGIICYSDGKSVSKSEPRLLLVSFDGFRADYLKKYELPHLQDFIKAGVLVEHVTNAFITKTFPNHYSIVTGLYEESHGIVANEMFDIDTKKNFSQFNDTDPFWWDEAIPIWVSNEWQENKTSASAMWPGTDVKIHNTLPHFFMKYNYSVSFSERVEKIIEWLNSSNPLVTFATLYWEEPDASGHRYGPEDTKNMTKVLQEVDKHIGLLVEKLKVSNLWEEINVIITSDHGMAQCSQERLIKLDRCIDPSSYVLIDRSPVAAILPNNVTHVYDLLKNCSPNMKVYLKEEIPERYHYHHNKRIQPIILVADEGWTIVQNGSLPRLGDHGYDDTLPSMQPFLAAHGPAFRKNYRLNSIRTIDIYPMMCHILGLKSQPNNGTLSN…	bis(5'-adenosyl)-triphosphatase ENPP4-like [Pantherophis guttatus]	XP_034282676.1	96.53
Phospholipase B (PLB)	SB1590_XARGPLB001	Putative percursor of snake venom Phospholipase B	ATGGTCCGCCACGGCATCGCCTCCTCCTCGGACAATCGCCGCCTGCGATGCTGGAGCTGGTACTGGGGGGGACTTTTAGTTCTCTGGGCCGTGGCAGAAACTCGAGCAGATCTCCACTATGCTACTGTATATTGGTTGGAAGCTGAAAAATCTTTCCAAGTTAGGGATGTATTAGACAAGAATGGTGATGCTTATGGCTATTACAATGACACTGTACAATCTACTGGATGGGGGATACTTGAGATCAAAGCAGGCTACGGTACTCAGCCCGTAAGCAATGAAATACTCATGTACGCTGCAGGTTTCTTGGAAGGCTACCTCACTGCTTCACGTATGAGTGACCATGTTGCAAATCTATATCATCAGCTGATTAAGAATGTCATCATTGAACAAAAAGTA…	MVRHGIASSSDNRRLRCWSWYWGGLLVLWAVAETRADLHYATVYWLEAEKSFQVRDVLDKNGDAYGYYNDTVQSTGWGILEIKAGYGTQPVSNEILMYAAGFLEGYLTASRMSDHVANLYHQLIKNVIIEQKVKDFMQKQDEWTRQQIKNNKDDPFWRNAGYIIAQLDGLYMGNVEWAKRQKRTPLTDFEISFLNAIGDLLDLIPALISDSRNNDFLSMREISRMYQWDMGHCSALIKVLPGYENIYFAHSSWFTYAATLRIYKHWDFRITDPQTKSGRASFSSYPGFLVSLDDFYILGSGLIMLQTTNSVFNLSLLKQVVPESLFAWERVRIANMMADSGKGWAQTFEKENSGTYNNQYMILDTKKIKLQRSIDDGTLYIIEQVPNLVKYSDQTDILR…	phospholipase B-like 1 [Pantherophis guttatus]	XP_034259424.1	94.94
Snake venom Endogenous Matrix-Metalloproteinase 9 (seMMP-9)	SB1590_XARGseMMP001	Putative percursor of snake venom snake venom endogenous matrix-metalloproteinase-9	ATGAGACTCCCAGTGCCGGCCTCCCTCCTCCTCCTCCTGGCGCTCCTGCCGCTGCCCTGTCCGTGGGCCGCCCCGACGGAAGGGAAGAGCCCCGTCGTCATCACCTTCCCCGGGGACGCCGTCAGCCACCTGACGGACCGGGAGCTGGCCGCCCGCTACCTCCAGCGTTACGGGTACCTGACGACGACCAACCCCGGGGGGCAGGTGAAGCTGGAGACCCCCCTCAAGGCCATGCAGAAACAGCTGGGCTTGCCGGAAACAGGGGAGCTGGACGCCCCCACCCTCACGGCCATGCGAGCGCCCCGCTGCGGAGTCCCGGACGTGGGTCGCTTCCAGACCTTCGAGGGCGACCTCAAGTGGGACCACACGAACCTCACTTACCGGGTGGTCAACTATTCC…	MRLPVPASLLLLLALLPLPCPWAAPTEGKSPVVITFPGDAVSHLTDRELAARYLQRYGYLTTTNPGGQVKLETPLKAMQKQLGLPETGELDAPTLTAMRAPRCGVPDVGRFQTFEGDLKWDHTNLTYRVVNYSPDLDGSIIEDAFARAFQVWREVTPLTFTRRQEGEVDILIQFGTGEHGDGYPFDGKDGLLAHAFPPGRDRFSGDAHFDDDEFWTLGRGVVVKTHFGNANGAVCRFPFIFEGKSYSSCTTEGREDGLPWCATTPDYDRDKTYGFCPSELLFTYDGNSDGEKCVFPFVFEGKSYQGCTTDGRTDGYRWCATTANFDQDKKYGFCPNRDTAVIGGNSQGEPCSFPFKFLGQTYSSCTTEGRTDGKPWCATTSDFDADKKWGFCPDQGYSL…	matrix metalloproteinase-9 [Pantherophis guttatus]	XP_034280049.1	90.00
Snake Venom Metalloproteinase P-III Class (SVMP P-III)	SB1590_XARGSVMPIII001	Putative percursor of snake venom metalloproteinase P-III Class	ATGATCCAAGCTCTCTTGGTTACTATATGCTTAGCGGTTTTTCCATATCAAGGGAGCTCTATAAAACTAGAATCCGGGAATGTTAATGATTATGAAGTGGTATATCCAAAAAAAATGCCTGTATGGCCCAAAGGAGGACTTCAGAATGCTGAGCCAGAGACTGAATATGAAGATGCAATGCAATATGAATTTCAAGTGAATGGAGAGCCAGTGGTCATTCACCTAGAAAGAAATAAAGGACTTTTTTCAGAAGATTACAGTGAAACTCATTATTCTCCTGATGGCAGAGAAATTACAACCACCCCTCCAGTTCAGGATCACTGCTATTATCACGGACACATCCAGAATGAAGCTGACTCAACTGCAGTCATCAGTGCATGTGACGGCTTGAAAGGACAT…	MIQALLVTICLAVFPYQGSSIKLESGNVNDYEVVYPKKMPVWPKGGLQNAEPETEYEDAMQYEFQVNGEPVVIHLERNKGLFSEDYSETHYSPDGREITTTPPVQDHCYYHGHIQNEADSTAVISACDGLKGHFKHQGETYFIEPLTLSNNEAHAVYKYDSLEKKDETHKTCGVTKTTWELDEPIEKITPEEQNAYLDAQKYIEFFIVVDNRMFRKYSSNFTVIRTRVYEIVNILNVIYRALKIHVALIGLEIWSNGDQIKVQSNSTVTLELFGEWREKDLIPRKRNDNAQLITDIDFDEATLGEASMASLCQSRKSVAVVLDHSETTSIMASTMAHELGHNLGIRHDRKSCNCNFYRCLMFPSASFQPSYQFSNCSIQDYQRYLIRRHPQCILNKPVI…	venom metalloprotease precursor [Philodryas chamissonis]	AJB84503.1	77.56
	SB1590_XARGSVMPIII002	Putative percursor of snake venom metalloproteinase P-III Class	ATGATCCAAGTTCTCTTGGTTACTATATACTTAGTGGTTTTTCCATATCAAGGGAGTTCTATAATCCTGGAATCCGGGAATGTTAATGATTATGAAGTAGTGTATCCACAAAAAGTGCCTGTATTGCCCAAAGGAGGACTTCAGAATGTTGAGCCAGAGACTGAGTATGAAGATACAATGCAATATGAATTTCAAGTGAATGGAGAGCCAGTGGTCCTTCACCTAGAAAGAAATAAAGGACTTTTTTCGGAAGATTACAGTGAAACTCATTATTCCCCTGATGGCAGAGAAATTACAACAAGCCCTCCAGTTCAGAATCACTGCTATTATCATGGACACATCCAGAATGAAGCTGACTCAACTGCAGTCATCAGTGCATGTGACGGCTTGAAAGGACAT…	MIQVLLVTIYLVVFPYQGSSIILESGNVNDYEVVYPQKVPVLPKGGLQNVEPETEYEDTMQYEFQVNGEPVVLHLERNKGLFSEDYSETHYSPDGREITTSPPVQNHCYYHGHIQNEADSTAVISACDGLKGHFKHQGETYFIEPLKLSNNEAHAVYKYDSLEKEDETHKTCGVTQTTWELDEPIEKISQVSITPEEQNTYLDAKKYIEFFIVVDNGMFRKYSSNLTAIRTRVYEIVNTVNTIYRALKIHVALIGVEFWSNRDKINVQSAANVTLDLFGAWRETDLLPRRNHDNAQLLTSTDFDGPTVGLGYVGTFCRPKHSSAIVQDHSDLTSLMASTMAHEMGHNLGINHDTNSCNCSSHACVMSPSIGSVPYYQFSSCSIEEHRRYLTRAQPQCIL…	snake venom metalloproteinase 13, partial [Borikenophis portoricensis]	AXL96563.1	88.13
	SB1590_XARGSVMPIII003	Putative percursor of snake venom metalloproteinase P-III Class	ATGATCCAAGCTCTCTTGGTAACTATATGCTTAGCGGTTTTTCCATATCAAGGGAGTTCTATAATCCTGGAAGCTGGGAAGGTTAACGATTATGAAGTAGTATATCCACAAAAAATCCCTGCATTGGCCAGAAGCAGAATTGAGCGGCGTGAGCAAAAGATGAAGTATGAAGATACCATGAAATATGAATTTAAAGTAAATGGAGAACCAGTGGTCCTTTATTTAGAAAAAAATAGACAACTTTTTTCCAAAGATTACACTGAGACTCATTATTCCCCTGATGGCAGAGAAATTACAACAAGCCCTCCAGTTGAGGATCACTGCTATTATCATGGTTACATTCAGAATGATGCCGACTCAACTGCAGTCATCAGTGTATGTGACGGCTTGAATGGGTAT…	MIQALLVTICLAVFPYQGSSIILEAGKVNDYEVVYPQKIPALARSRIERREQKMKYEDTMKYEFKVNGEPVVLYLEKNRQLFSKDYTETHYSPDGREITTSPPVEDHCYYHGYIQNDADSTAVISVCDGLNGYFKNNGEMYLIEPLKPSDNEAHAVYKYESLEKEDEIPKTCGAIHSSGKSDESIKKTSKLFSTPKEKEEYLESKKYIELYIVADNLIFRKYNRDITTIRMRVSEIVNSVNQFYKPLNIHVALIGLDIWSDEDKIVINASSEYTVRSFAAWRHSNLLPRKMNDNAQLLTGVHFDGQTLGIAFKGKMCNFWQSVGVVQDNNNKAVLIASIMTHEIGHNLGMNHDTDSCTCNTGPCIMKPAIDFYPPLKFSSCSLWDYEQYAMTEDAQCIL…	metalloproteinase [Dispholidus typus]	QGC85372.1	76.45
Three-finger toxin (3FTX)	SB1590_XARG3FTX001	Putative percursor of snake venom Three-finger toxin	ATGAAAACTCTGCTGCTGTCCTTGGTGGTGGTGGCATTCGTGTACCTGGACTCAGGACACACCATTAAATGTCACTCATGCAACAGAATGATGTGTATAGGTTCTGAGGATTGTCCAAATGCAATGGCATGCTATAAAAAGACTTCTGGTCTATTAGGATTGAATGTCGACAAGGGATGTGCTACTAATTGCACTTTTCCGGCAGCCGATGAGAGAATTGAATATTGCGCAAAAGACAGGTGCAACCATTAG	MKTLLLSLVVVAFVYLDSGHTIKCHSCNRMMCIGSEDCPNAMACYKKTSGLLGLNVDKGCATNCTFPAADERIEYCAKDRCNH	three-finger toxin [Heterodon nasicus]	UMW88055.1	69.51
	SB1590_XARG3FTX002	Putative percursor of snake venom Three-finger toxin	ATGAAAACTCTGCTGCTGTCCTTGGTGGTGGTGGCATTCGTGTACCTGGACTCAGGATACACCATTAAATGTAATTCATGCTCTAGACCACCTTGTATGACTTTTCAGGATTGTCCAGATGCAACGGCATGCTATACAAAGAGGTCTGGTCTATTAGGACTGCCTTTCGCCCAGGGATGTGCTACTAATTGCACTTTTCCGGCAGCCGATGAGAAAATTGAATATTGCGCAAAAGACAGGTGTAACCGTTAG	MKTLLLSLVVVAFVYLDSGYTIKCNSCSRPPCMTFQDCPDATACYTKRSGLLGLPFAQGCATNCTFPAADEKIEYCAKDRCNR	three-finger toxin [Helicops leopardinus]	UMW88048.1	71.08
Vascular Endothelial Growth Factor (VEGF)	SB1590_XARGVEGF001	Putative percursor of snake venom vascular endothelial growth factor	ATGAACTTTCTGCTCACTTGGATCCACTGGGGGTTGGCGGCGCTGCTTTATTTCCACAACGCCAAGGTGTTGCAGGCTGCTCCTGCCCAGGGGGATGGAGAAAGGCAACAAGGTGAAGTTATCTCATTTATGAAGGTCTATGAGCGCAGTGCCTGCAGGGTAATTGAGACCATGGTAGATATTTTCCAGGAGTATCCTGATGAAGTGGAATACATCTTCAAGCCATCCTGTGTGGCCCTGATGAGATGTGCAGGATGCTGTAATGATGAAGCACTAGAATGTATGCCTACAGAGGTGTACAATGTGACAATGGAGATCATGAAACTCAAACACTTTCAGAGCCAGCATATACATCCGATGAGCTTCCTGCAGCACAGTAGATGTGAATGCAGACCAAAG…	MNFLLTWIHWGLAALLYFHNAKVLQAAPAQGDGERQQGEVISFMKVYERSACRVIETMVDIFQEYPDEVEYIFKPSCVALMRCAGCCNDEALECMPTEVYNVTMEIMKLKHFQSQHIHPMSFLQHSRCECRPKKEIRIRQEKCEKPRR	vascular endothelial growth factor A isoform X3 [Thamnophis elegans]	XP_032072242.1	92.57
	SB1590_XARGVEGF002	Putative percursor of snake venom vascular endothelial growth factor	ATGAACTTTCTGCTCACTTGGATCCACTGGGGGTTGGCGGCGCTGCTTTATTTCCACAACGCCAAGGTGTTGCAGGCTGCTCCTGCCCAGGGGGATGGAGAAAGGCAACAAGGTGAAGTTATCTCATTTATGAAGGTCTATGAGCGCAGTGCCTGCAGGGTAATTGAGACCATGGTAGATATTTTCCAGGAGTATCCTGATGAAGTGGAATACATCTTCAAGCCATCCTGTGTGGCCCTGATGAGATGTGCAGGATGCTGTAATGATGAAGCACTAGAATGTATGCCTACAGAGGTGTACAATGTGACAATGGAGATCATGAAACTCAAACACTTTCAGAGCCAGCATATACATCCGATGAGCTTCCTGCAGCACAGTAGATGTGAATGCAGACCAAAG…	MNFLLTWIHWGLAALLYFHNAKVLQAAPAQGDGERQQGEVISFMKVYERSACRVIETMVDIFQEYPDEVEYIFKPSCVALMRCAGCCNDEALECMPTEVYNVTMEIMKLKHFQSQHIHPMSFLQHSRCECRPKKEIRIRQEKKSKRGKGKGQKRKRKRGRYKPQNFHCEPCSERRKHLYKQDPLTCKCSCKFTDSRCKSKQLELNERTCRCEKPRR	vascular endothelial growth factor A isoform X1 [Thamnophis elegans]	XP_032072240.1	94.44
