# Supplementary material for: The Venom Composition of the Snake Tribe Philodryadini: ‘Omic’ Techniques Reveal Intergeneric Variability among South American Racers
Source: Toxins (Basel). 2023 Jun 27;15(7):415. doi: 10.3390/toxins15070415 (PMC10467154; doi:10.3390/toxins15070415)
Supplement: Supplementary file 1 [file toxins-15-00415-s001.zip › Supplementary_Table_S3_rsem_expression.xlsx]

## Sheet: SB0001 P OLF
Table S3. Expression levels of toxins expressed in TPM and FPKM in the venom gland of Philodryadini individuals.
Transcriptomic analysis of individual SB0001 Philodryas olfersii
Protein Group	transcript_id	length	effective_length	expected_count	TPM	FPKM	IsoPct
CNP	SB0001_POLFCNP001	486	278.91	11322	20836.74	24547.57	100
CRISP	SB0001_POLFCRISP001	720	512.91	41225	41256.38	48603.75	100
CTL	SB0001_POLFCTL002	498	290.91	79	139.39	164.22	100
CTL	SB0001_POLFCTL003	483	275.91	9281	17266.18	20341.13	100
CTL	SB0001_POLFCTL004	471	263.93	221	429.82	506.36	100
CTL	SB0001_POLFCTL006	471	263.93	10574	20565.05	24227.49	100
CTL	SB0001_POLFCTL008	495	287.91	195	347.66	409.57	100
HYAL	SB0001_POLFHYAL001	1344	1136.91	353	159.38	187.76	100
iPLA	SB0001_POLFiPLA001	705	497.91	272	280.41	330.35	100
KUNZ	SB0001_POLFKUNZ001	1107	899.91	192	109.52	129.02	100
KUWAP	SB0001_POLFKUWAP001	420	213.25	32	77.03	90.74	100
NUCL	SB0001_POLFNUCL001	1767	1559.91	169	55.61	65.51	100
PLB	SB0001_POLFPLB001	1662	1454.91	5947	2098.14	2471.79	100
seMMP-9	SB0001_POLFSeMMP001	2079	1871.91	8589.47	4710.68	5549.6	100														4710.68
seMMP-9	SB0001_POLFSeMMP004	2079	1871.91	31.06	8.52	10.04	100
SVMP P-III	SB0001_POLFSVMPIII001	1836	1628.91	212618.44	67000.13	78932.23	100														5549.6
SVMP P-III	SB0001_POLFSVMPIII002	1854	1646.91	28834.38	8986.95	10587.45	100
SVMP P-III	SB0001_POLFSVMPIII003	1845	1637.91	54371.28	17039.28	20073.82	100
SVMP P-III	SB0001_POLFSVMPIII004	1836	1628.91	233399.36	73548.59	86646.92	100
SVMP P-III	SB0001_POLFSVMPIII005	1824	1616.91	43230.99	13724.01	16168.13	100
SVMP P-III	SB0001_POLFSVMPIII006	1839	1631.91	41279.7	12984.11	15296.46	100
SVMP P-III	SB0001_POLFSVMPIII007	1848	1640.91	16479.18	5154.93	6072.97	100
SVMP P-III	SB0001_POLFSVMPIII008	1836	1628.91	73421.67	23136.57	27256.98	100
SVSP	SB0001_POLFSVSP001	792	584.91	3813.11	3346.28	3942.22	100
SVSP	SB0001_POLFSVSP002	786	578.91	8194.89	7266.13	8560.17	100
VEGF	SB0001_POLFVEGF001	579	371.91	61	84.19	99.18	100

## Sheet: SB0026 P OLF
Table S3. Expression levels of toxins expressed in TPM and FPKM in the venom gland of Philodryadini individuals
Transcriptomic analysis of individual SB0026 Philodryas olfersii
Protein Group	transcript_id	length	effective_length	expected_count	TPM	FPKM	IsoPct
CNP	SB0001_POLFCNP001	486	285.6	5143	5622.27	6947.98	100
CRISP	SB0001_POLFCRISP001	720	519.6	55286	33219.89	41052.99	100
CTL	SB0001_POLFCTL003	483	282.6	2268	2505.67	3096.49	100
CTL	SB0001_POLFCTL006	471	270.61	3137	3619.3	4472.71	100
CTL	SB0001_POLFCTL008	495	294.6	108	114.46	141.45	100
HYAL	SB0001_POLFHYAL001	1344	1143.6	645	176.09	217.61	100
iPLA	SB0001_POLFiPLA001	705	504.6	135	83.53	103.23	100
NUCL	SB0001_POLFNUCL001	1767	1566.6	548	109.21	134.96	100
PLB	SB0001_POLFPLB001	1662	1461.6	5491	1172.93	1449.51	100
seMMP-9	SB0026_POLFSeMMP001	2079	1878.6	10544	1752.35	2165.55	100
SVMP P-III	SB0001_POLFSVMPIII001	1836	1635.6	224940.67	42937.94	53062.52	100
SVMP P-III	SB0001_POLFSVMPIII002	1854	1653.6	34397.09	6494.44	8025.8	100
SVMP P-III	SB0001_POLFSVMPIII003	1845	1644.6	97447.97	18499.62	22861.75	100
SVMP P-III	SB0001_POLFSVMPIII004	1836	1635.6	302465.76	57736.37	71350.35	100
SVMP P-III	SB0001_POLFSVMPIII005	1824	1623.6	84521.56	16253.2	20085.63	100
SVMP P-III	SB0001_POLFSVMPIII006	1839	1638.6	2449.05	466.63	576.66	100
SVMP P-III	SB0001_POLFSVMPIII007	1848	1647.6	19114.35	3622.08	4476.15	100
SVMP P-III	SB0001_POLFSeMMP008	1836	1635.6	1068.57	203.97	252.07	100
SVSP	SB0001_POLFSVSP001	792	591.6	1351.7	713.35	881.56	100
SVSP	SB0001_POLFSVSP002	786	585.6	10289.3	5485.76	6779.27	100
VEGF	SB0001_POLFVEGF001	579	378.6	106	87.41	108.03	100

## Sheet: SB0132 P OLF
Table S3. Expression levels of toxins expressed in TPM and FPKM in the venom gland of Philodryadini individuals.
Transcriptomic analysis of individual SB0132 Philodryas olfersii
Protein Group	transcript_id	length	effective_length	expected_count	TPM	FPKM	IsoPct
CNP	SB0001_POLFCNP001	486	329.12	14984	3550.44	4042.53	100
CRISP	SB0001_POLFCRISP001	720	563.12	194840	26982.7	30722.52	100
CTL	SB0001_POLFCTL002	498	341.12	1022	233.64	266.03	100
CTL	SB0001_POLFCTL003	483	326.12	21547	5152.5	5866.64	100
CTL	SB0001_POLFCTL004	471	314.12	1675	415.84	473.48	100
CTL	SB0001_POLFCTL006	471	314.12	17618	4373.91	4980.14	100
CTL	SB0001_POLFCTL008	495	338.12	2375	547.77	623.7	100
CYS	SB0001_POLFCYS001	432	275.12	500	141.73	161.37	100
CYS	SB0001_POLFCYS002	411	254.12	263	80.71	91.9	100
HYAL	SB0001_POLFHYAL001	1344	1187.12	867	56.96	64.85	100
iPLA	SB0001_POLFiPLA001	705	548.12	1978	281.42	320.43	100
KUNZ	SB0001_POLFKUNZ001	1107	950.12	909	74.61	84.95	100
KUWAP	SB0001_POLFKUWAP001	420	263.12	184	54.53	62.09	100
NUCL	SB0001_POLFNUCL001	1767	1610.12	360	17.44	19.85	100
PLB	SB0001_POLFPLB001	1662	1505.12	14020	726.41	827.1	100
seMMP-9	SB0001_POLFSeMMP004	2079	1922.12	61.88	2.51	2.86	100
seMMP-9	SB0001_POLFSeMMP001	2079	1922.12	6008.52	243.78	277.56	100
seMMP-9	SB0026_POLFSeMMP001	2079	1922.12	18336.6	743.95	847.07	100
SVMP P-III	SB0001_POLFSVMPIII001	1836	1679.12	441233.81	20492.49	23332.77	100
SVMP P-III	SB0001_POLFSVMPIII002	1854	1697.12	95379.06	4382.76	4990.22	100
SVMP P-III	SB0001_POLFSVMPIII003	1845	1688.12	108550.91	5014.62	5709.65	100
SVMP P-III	SB0001_POLFSVMPIII004	1836	1679.12	690775.37	32082.1	36528.71	100
SVMP P-III	SB0001_POLFSVMPIII005	1824	1667.12	125224.63	5857.75	6669.64	100
SVMP P-III	SB0001_POLFSVMPIII006	1839	1682.12	18562.66	860.58	979.86	100
SVMP P-III	SB0001_POLFSVMPIII007	1848	1691.12	40359.62	1861.15	2119.1	100
SVMP P-III	SB0001_POLFSVMPIII008	1836	1679.12	272666.96	12663.64	14418.83	100
SVSP	SB0001_POLFSVSP001	792	635.12	5616.44	689.63	785.21	100
SVSP	SB0001_POLFSVSP002	786	629.12	29415.56	3646.29	4151.67	100
VEGF	SB0001_POLFVEGF001	579	422.12	207	38.24	43.54	100

## Sheet: SB0183 P ASZ
Table S3. Expression levels of toxins expressed in TPM and FPKM in the venom gland of Philodryadini individuals.
Transcriptomic analysis of individual SB0183 Philodryas agassizii
Protein Group	transcript_id	length	effective_length	expected_count	TPM	FPKM	IsoPct
3FTX	SB0183_PASZ3FTX001	249	84.2	19937	12538.16	20930.51	100
3FTX	SB0183_PASZ3FTX002	249	84.2	13978	8790.61	14674.56	100
CNP	SB0183_PASZCNP001	486	319.44	1722	285.44	476.49	100
CRISP	SB0183_PASZCRISP001	720	553.44	222724	21309.12	35572.27	100
CTL	SB0183_PASZCTL001	492	325.44	468.77	76.27	127.32	100
CTL	SB0183_PASZCTL002	477	310.44	15262.66	2603.27	4345.75	100
CTL	SB0183_PASZCTL003	477	310.44	3926.34	669.69	1117.95	100
CTL	SB0183_PASZCTL004	492	325.44	1226.23	199.51	333.05	100
CTL	SB0183_PASZCTL005	552	385.44	179.74	24.69	41.22	100
CTL	SB0183_PASZCTL006	498	331.44	2010.21	321.15	536.11	100
CTL	SB0183_PASZCTL007	471	304.44	37391	6503.27	10856.2	100
CTL	SB0183_PASZCTL008	495	328.44	38111	6144.14	10256.69	100
CTL	SB0183_PASZCTL009	396	229.44	2.05	0.47	0.79	100
iPLA	SB0183_PASZiPLA001	702	535.44	1860	183.94	307.06	100
KUNZ	SB0183_PASZKUNZ002	303	136.44	156.04	60.56	101.09	100
KUWAP	SB0183_PASZKUWAP001	1098	931.44	3245.86	184.52	308.03	100
KUWAP	SB0183_PASZKUWAP002	420	253.44	3962	827.76	1381.82	100
KUWAP	SB0183_PASZKUWAPZ003	1113	946.44	4726.1	264.41	441.39	100
PLB	SB0183_PASZPLB001	1662	1495.44	11324	400.96	669.34	100
seMMP-9	SB0183_PASZSeMMP002	2076	1909.44	19246	533.71	890.95	100
seMMP-9	SB0183_PASZSeMMP003	1902	1735.44	5700.38	173.93	290.34	100
seMMP-9	SB0183_PASZSeMMP004	1902	1735.44	574.44	17.53	29.26	100
seMMP-9	SB0183_PASZSeMMP001	2076	1909.44	21100.18	585.13	976.78	100
SVMP P-III	SB0183_PASZSVMPIII001	1836	1669.44	210037.87	6661.9	11121	100
SVMP P-III	SB0183_PASZSVMPIII002	1833	1666.44	399543.25	12695.37	21192.95	100
SVMP P-III	SB0183_PASZSVMPIII003	1836	1669.44	557402.81	17679.48	29513.15	100
SVMP P-III	SB0183_PASZSVMPIII004	1851	1684.44	59482.21	1869.83	3121.4	100
SVMP P-III	SB0183_PASZSVMPIII005	1851	1684.44	20740.31	651.97	1088.37	100
SVMP P-III	SB0183_PASZSVMPIII006	1845	1678.44	57571.53	1816.24	3031.93	100
SVSP	SB0183_PASZSVSP001	786	619.44	1564	133.69	223.18	100
WAP	SB0183_PASZWAP001	408	241.44	1840	403.53	673.63	100
WAP	SB0183_PASZWAP002	240	76.16	1571	1092.18	1823.22	100

## Sheet: SB0235 P PAT
Table S3. Expression levels of toxins expressed in TPM and FPKM in the venom gland of Philodryadini individuals.
Transcriptomic analysis of individual SB0235 Philodryas patagoniensis
Protein Group	Transcript id	Length	Effective Length	Expected Count	TPM	FPKM	IsoPct
AChE	SB0235_PPATAChE001	1746	1576.73	107.71	3.21	3.52	100
AChE	SB0235_PPATAChE002	1821	1651.73	69.29	1.97	2.16	100
CNP	SB0235_PPATCNP001	477	307.73	8715.99	1331.19	1461.32	100
CNP	SB0235_PPATCNP002	483	313.73	5234.01	784.1	860.75	100
CRISP	SB0235_PPATCRISP001	720	550.73	413845	35317.46	38770.02	100
CTL	SB0235_PPATCTL001	483	313.73	20283	3038.56	3335.61	100
CTL	SB0235_PPATCTL004	471	301.73	8104.77	1262.45	1385.87	100
CTL	SB0235_PPATCTL006	471	301.73	4998.02	778.52	854.63	100
CTL	SB0235_PPATCTL007	495	325.73	7277	1049.99	1152.64	100
CTL	SB0235_PPATCTL009	471	301.73	1267.49	197.43	216.73	100
CTL	SB0235_PPATCTL010	471	301.73	393.51	61.3	67.29	100
CTL	SB0235_PPATCTL011	492	322.73	1484	216.12	237.24	100
CTL	SB0235_PPATCTL013	498	328.73	34	4.86	5.34	100
CTL	SB0235_PPATCTL014	333	163.73	57.22	16.42	18.03	100
CYS	SB0235_PPATCYS001	411	241.73	360	69.99	76.84	100
iPLA	SB0235_PPATiPLA001	702	532.73	1184	104.46	114.67	100
KUNZ	SB0235_PPATKUNZ002	303	133.73	9.81	3.45	3.78	100
KUNZ	SB0235_PPATKUNZ003	303	133.73	65.19	22.91	25.15	100
KUWAP	SB0235_PPATKUWAP001	420	250.73	107	20.06	22.02	100
NUCL	SB0235_PPATNUCL002	1767	1597.73	386	11.35	12.46	100
PLB	SB0235_PPATPLB001	1545	1375.73	4206.96	143.72	157.77	100
PLB	SB0235_PPATPLB002	1662	1492.73	17477.04	550.27	604.06	100
seMMP-9	SB0235_PPATSeMMP001	2076	1906.73	533631.82	13153.5	14439.35	100
seMMP-9	SB0235_PPATSVMMP002	2070	1900.73	581267.09	14372.89	15777.95	100
SVLIPA	SB0235_PPATSVLIPA001	1203	1033.73	112.81	5.13	5.63	100
SVLIPA	SB0235_PPATSVLIPA002	1203	1033.73	108.05	4.91	5.39	100
SVLIPA	SB0235_PPATSVLIPA003	1203	1033.73	66.14	3.01	3.3	100
SVMP P-III	SB0235_PPATSVMPIII001	1836	1666.73	210225.76	5928.02	6507.53	100
SVMP P-III	SB0235_PPATSVMPIII002	1851	1681.73	19689.77	550.27	604.06	100
SVMP P-III	SB0235_PPATSVMPIII003	1836	1666.73	298060.24	8404.8	9226.44	100
SVMP P-III	SB0235_PPATSVMPIII004	1866	1696.73	23681.77	655.98	720.11	100
SVMP P-III	SB0235_PPATSVMPIII005	1851	1681.73	491465.05	13734.89	15077.58	100
SVMP P-III	SB0235_PPATSVMPIII006	1746	1576.73	203316.94	6060.45	6652.91	100
SVMP P-III	SB0235_PPATSVMPIII007	1842	1672.73	300948.48	8455.81	9282.43	100
SVMP P-III	SB0235_PPATSVMPIII008	1833	1663.73	1140451.2	32216.82	35366.27	100
SVMP P-III	SB0235_PPATSVMPIII009	1845	1675.73	276198.64	7746.51	8503.8	100
SVMP P-III	SB0235_PPATSVMPIII010	1827	1657.73	282386.87	8006.07	8788.73	100
SVMP P-III	SB0235_PPATSVMPIII011	1830	1660.73	161602.87	4573.4	5020.48	100
SVSP	SB0235_PPATSVSP001	792	622.73	66297.86	5003.68	5492.83	100
SVSP	SB0235_PPATSVSP002	786	616.73	91923.02	7005.18	7689.99	100
VEGF	SB0235_PPATVEGF001	642	472.73	267	26.55	29.14	100
WAP	SB0235_PPATWAP001	408	238.73	1297	255.34	280.31	100
WAP	SB0235_PPATWAP002	255	86.96	62	33.51	36.79	100
WAP	SB0235_PPATWAP003	252	84.2	1596.72	891.22	978.35	100
WAP	SB0235_PPATWAP004	240	73.45	1671.28	1069.39	1173.93	100

## Sheet: SB0307 P NAT
Table S3. Expression levels of toxins expressed in TPM and FPKM in the venom gland of Philodryadini individuals.
Transcriptomic analysis of individual SB0307 Philodryas nattereri
Protein Group	transcript_id	length	effective_length	expected_count	TPM	FPKM	IsoPct
CNP	SB0307_PNATCNP001	510	349.48	17886.97	3249.52	4007.15	100
CNP	SB0307_PNATCNP003	501	340.48	4489.03	837.08	1032.24	100
CRISP	SB0307_PNATCRISP001	714	553.48	427495	49038.16	60471.39	100
CTL	SB0307_PNATCTL004	471	310.48	34946.57	7146.21	8812.34	100
CTL	SB0307_PNATCTL005	483	322.48	49771.43	9799.01	12083.64	100
CTL	SB0307_PNATCTL006	477	316.48	2741	549.88	678.08	100
CTL	SB0307_PNATCTL007	495	334.48	14978	2843.08	3505.94	100
CFV	SB0307_PNATCVF001	4734	4573.48	2802	38.9	47.97	100
CYS	SB0307_PNATCYS001	411	250.48	380	96.32	118.78	100
iPLA	SB0307_PNATiPLA001	705	544.48	2979	347.37	428.36	100
PLB	SB0307_PNATPLB001	1662	1501.48	30295	1281.02	1579.69	100
seMMP-9	SB0307_PNATSeMMP001	2070	1909.48	124165.07	4128.48	5091.03	100
seMMP-9	SB0307_PNATSeMMP003	2070	1909.48	127890.93	4252.36	5243.8	100
SVLIPA	SB0307_PNATSVLIPA001	1203	1042.48	497	30.13	36.98	100
SVMP P-III	SB0307_PNATSVMPIII001	1848	1687.48	246937.6	9290.82	11456.97	100
SVMP P-III	SB0307_PNATSVMPIII002	1848	1687.48	683872.15	25730.11	31729.08	100
SVMP P-III	SB0307_PNATSVMPIII004	1836	1675.48	206429.31	7822.35	9646.13	100
SVMP P-III	SB0307_PNATSVMPIII005	1845	1684.48	247645.96	9334.06	11510.3	100
SVMP P-III	SB0307_PNATSVMPIII006	1836	1675.48	251596.49	9533.9	11756.73	100
SVMP P-III	SB0307_PNATSeMMP007	1845	1684.48	364186.48	13726.61	16926.97	100
SVSP	SB0307_PNATSVSP001	792	631.48	49367.46	4963.48	6120.71	100
SVSP	SB0307_PNATSVSP002	906	745.48	446.54	38.03	46.9	100
WAP	SB0307_PNATWAP001	240	81.45	463	360.9	445.04	100
WAP	SB0307_PNATWAP002	405	244.48	287	74.53	91.91	100

## Sheet: SB01881 P MAT
Table S3. Expression levels of toxins expressed in TPM and FPKM in the venom gland of Philodryadini individuals.
Transcriptomic analysis of individual SB1881 Philodryas mattogrossensis
Protein Group	transcript_id	length	effective_length	expected_count	TPM	FPKM	IsoPct
CNP	SB1881_PMATCNP002	513	341.77	948	496.58	489.42	100
CRISP	SB1881_PMATCRISP001	720	548.77	298689	97441.5	96036.36	100
CTL	SB1881_PMATCTL001	483	311.77	21718	12470.9	12291.07	100
CTL	SB1881_PMATCTL002	471	299.77	21099	12600.44	12418.74	100
CTL	SB1881_PMATCTL003	495	323.77	1489	823.32	811.45	100
CTL	SB1881_PMATCTL004	498	326.77	379	207.64	204.65	100
CTL	SB1881_PMATCTL005	483	311.77	74	42.49	41.88	100
CTL	SB1881_PMATCTL006	498	326.77	50	27.39	27	100
CTL	SB1881_PMATCTL007	513	341.77	32	16.76	16.52	100
CTL	SB1881_PMATCTL009	495	323.77	44	24.33	23.98	100
CTL	SB1881_PMATCTL010	531	359.77	84	41.8	41.2	100
FICOLIN	SB1881_PMATFICOLIN001	999	827.77	537	116.14	114.46	100
FICOLIN	SB1881_PMATFICOLIN002	936	764.77	1005	235.26	231.87	100
KUNZ	SB1881_PMATKUNZ001	1542	1370.77	136	17.76	17.51	100
KUNZ	SB1881_PMATKUNZ002	759	587.77	773	235.44	232.05	100
PLB	SB1881_PMATPLB001	1662	1490.77	9748	1170.64	1153.76	100
seMMP-9	SB1881_PMATSeMMP001	2073	1901.77	116933	11007.7	10848.97	100
SVMP P-III	SB1881_PMATSVMPIII001	1833	1661.77	23687.08	2551.87	2515.07	100
SVMP P-III	SB1881_PMATSVMPIII002	1842	1670.77	226195.34	24237.31	23887.8	100
SVMP P-III	SB1881_PMATSVMPIII003	1848	1676.77	44904.46	4794.39	4725.25	100
SVMP P-III	SB1881_PMATSVMPIII022	1848	1676.77	165768.68	17698.91	17443.68	100
SVMP P-III	SB1881_PMATSVMPIII028	1836	1664.77	88904.89	9560.68	9422.81	100
SVMP P-III	SB1881_PMATSVMPIII033	1848	1676.77	74946.09	8001.9	7886.51	100
SVMP P-III	SB1881_PMATSVMPIII138	1845	1673.77	528686.15	56548.3	55732.86	100
SVMP P-III	SB1881_PMATSVMPIII240	1848	1676.77	670193.3	71555.66	70523.81	100
VEGF	SB1881_PMATVEGF001	579	407.77	215.62	94.66	93.3	100
VEGF	SB1881_PMATVEGF002	447	275.77	5.38	3.49	3.44	100
WAP	SB1881_PMATWAP001	240	71.98	831	2066.78	2036.98	100

## Sheet: SB0512 C LAT
Table S3. Expression levels of toxins expressed in TPM and FPKM in the venom gland of Philodryadini individuals.
Transcriptomic analysis of individual SB0512 Chlorosoma laticeps
Protein Group	Transcript id	Length	Effective Length	Expected Count	TPM	FPKM	IsoPct
3FTx	SB0512_CLAT3FTx001	252	82.37	108	127.54	121.95	100
3FTx	SB0512_CLAT3FTx005	252	82.37	321	379.07	362.46	100
CNP	SB0512_CLATCNP001	489	317.85	1589.51	486.46	465.14	100
CNP	SB0512_CLATCNP002	474	302.85	1430.49	459.48	439.34	100
CRISP	SB0512_CLATCRISP001	720	548.85	32016	5815.75	5428.35	100
CTL	SB0512_CLATCTL001	477	305.85	18	5.72	5.47	100
CTL	SB0512_CLATCTL002	471	299.85	45852.28	14875.28	14223.39	100
CTL	SB0512_CLATCTL004	492	320.85	28	8.49	8.12	100
CTL	SB0512_CLATCTL014	483	311.85	27071.98	8444.67	8074.59	100
CTL	SB0512_CLATCTL015	483	311.85	11217.02	3498.97	3345.63	100
CTL	SB0512_CLATCTL016	333	161.85	152.72	91.79	87.76	100
CYS	SB0512_CLATCYS001	435	263.85	696	256.6	245.36	100
CYS	SB0512_CLATCYS001	411	239.85	168	68.14	65.15	100
FAXV	SB0512_CLATFAXV001	1455	1283.85	61	4.62	4.42	100
iPLA	SB0512_CLATiPLA001	702	530.85	343.03	62.86	60.1	100
iPLA	SB0512_CLATiPLA002	702	530.85	342.97	62.85	60.09	100
NUCL	SB0512_CLATNUCL001	1767	1595.85	624	38.04	36.37	100
PLB	SB0512_CLATPLB001	1674	1502.85	11371	736.03	703.77	100
seMMP-9	SB0512_CLATSeMMP007	2043	1871.85	1812107.48	94172.88	90045.88	100																693
SVLIPA	SB0512_CLATSVLIPA002	1203	1031.85	123	11.6	11.09	100
SVMP P-III	SB0512_CLATSVMPIII001	1836	1664.85	196425.46	11762.97	10979.41	100
SVMP P-III	SB0512_CLATSVMPIII003	1851	1679.85	93232.57	5533.39	5164.8	100
SVMP P-III	SB0512_CLATSVMPIII007	1848	1676.85	100269.97	5961.71	5564.59	100
SVSP	SB0512_CLATSVSP002	786	614.85	92933.46	14703.27	14058.92	100
SVSP	SB0512_CLATSVSP015	780	608.85	20.54	3.28	3.14	100
VEGF	SB0512_CLATVEGF001	651	479.85	119.91	24.31	23.24	100
VEGF	SB0512_CLATVEGF003	579	407.85	223.09	53.21	50.88	100
WAP	SB0512_CLATWAP002	396	224.85	72	31.15	29.78	100

## Sheet: SB0559 C VIR
Table S3. Expression levels of toxins expressed in TPM and FPKM in the venom gland of Philodryadini individuals.
Transcriptomic analysis of individual SB0559 Chlorosoma viridissimum
Protein Group	Transcript id	Length	Effective Length	Expected Count	TPM	FPKM	IsoPct
3FTx	SB0559_CVIR3FTx001	246	74.19	488	520.53	454.45	100
3FTx	SB0559_CVIR3FTx005	252	79.55	127	126.34	110.3	100
CNP	SB0559_CVIRCNP001	504	329.87	387	92.84	81.06	100
CRISP	SB0559_CVIRCRISP001	720	545.87	129218	18732.85	16354.93	100
CTL	SB0559_CVIRCTL001	492	317.87	546	135.93	118.67	100
CTL	SB0559_CVIRCTL002	447	272.87	302.74	87.8	76.65	100
CTL	SB0559_CVIRCTL003	483	308.87	23263	5960.17	5203.59	100
CTL	SB0559_CVIRCTL004	447	272.87	257.26	74.61	65.14	100
CTL	SB0559_CVIRCTL006	495	320.87	91	22.44	19.59	100
CTL	SB0559_CVIRCTL010	471	296.87	26430	7045.29	6150.97	100
CYS	SB0559_CVIRCYS001	444	269.87	474	138.99	121.35	100
CYS	SB0559_CVIRCYS002	414	239.87	420	138.56	120.97	100
iPLA	SB0559_CVIRiPLA001	708	533.87	2087	309.35	270.09	100
KUWAP	SB0559_CVIRKUWAP002	1107	932.87	895	75.92	66.29	100
NUCL	SB0559_CVIRNUCL001	1767	1592.87	6933	344.44	300.72	100
PLB	SB0559_CVIRPLB001	1668	1493.87	10933	579.16	505.64	100
seMMP-9	SB0559_CVIRSeMMP011	2037	1862.87	278163.95	11816.53	10316.56	100
seMMP-9	SB0559_CVIRSeMMP018	2037	1862.87	870618.42	36984.26	32289.54	100
seMMP-9	SB0559_CVIRSeMMP022	2037	1862.87	238162.16	10117.23	8832.97	100
SVLIPA	SB0559_CVIRSVLIPA002	1203	1028.87	254	19.54	17.06	100
SVMP P-III	SB0559_CVIRSVMPIII002	1839	1664.87	45894.4	2181.48	1904.57	100
SVMP P-III	SB0559_CVIRSVMPIII004	1848	1673.87	259661.97	12276.04	10717.74	100
SVMP P-III	SB0559_CVIRSVMPIII006	1839	1664.87	100284.57	4766.78	4161.7	100
SVMP P-III	SB0559_CVIRSVMPIII008	1839	1664.87	103121.87	4901.65	4279.44	100
SVMP P-III	SB0559_CVIRSVMPIII009	1848	1673.87	284464.04	13448.6	11741.46	100
SVMP P-III	SB0559_CVIRSVMPIII010	1851	1676.87	22892.92	1080.37	943.23	100
SVSP	SB0559_CVIRSVSP002	786	611.87	75554.23	9771.69	8531.29	100
VEGF	SB0559_CVIRVEGF001	651	476.87	75.18	12.48	10.89	100
VEGF	SB0559_CVIRVEGF003	579	404.87	104.82	20.49	17.89	100
WAP	SB0559_CVIRWAP002	405	230.87	206	70.61	61.65	100

## Sheet: SB01590 X ARG
Table S3. Expression levels of toxins expressed in TPM and FPKM in the venom gland of Philodryadini individuals.
Transcriptomic analysis of individual SB1590 Xenoxybelis argenteus
Protein Group	transcript_id	length	effective_length	expected_count	TPM	FPKM	IsoPct
3FTX	SB1590_XARG3FTX001	252	80.28	706	1356.88	1230.72	100
3FTX	SB1590_XARG3FTX002	252	80.28	154	295.98	268.46	100
AChE	SB1590_XARGAChE001	1686	1512.42	846.38	86.35	78.32	100
AChE	SB1590_XARGAChE002	1779	1605.42	1473.62	141.63	128.46	100
CRISP	SB1590_XARGCRISP001	720	546.42	171072	48306.86	43815.52	100
CTL	SB1590_XARGCTL001	471	297.42	3658	1897.72	1721.28	100
CTL	SB1590_XARGCTL002	492	318.42	384	186.08	168.77	100
CTL	SB1590_XARGCTL003	504	330.42	342.7	160.03	145.15	100
CTL	SB1590_XARGCTL004	489	315.42	209	102.24	92.73	100
CTL	SB1590_XARGCTL005	477	303.42	110	55.94	50.74	100
CTL	SB1590_XARGCTL006	483	309.42	3902	1945.79	1764.88	100
CTL	SB1590_XARGCTL007	498	324.42	3059	1454.89	1319.62	100
CTL	SB1590_XARGCTL008	495	321.42	2056	986.98	895.21	100
CTL	SB1590_XARGCTL009	483	309.42	465	231.88	210.32	100
CTL	SB1590_XARGCTL010	495	321.42	120	57.61	52.25	100
CTL	SB1590_XARGCTL011	495	321.42	34	16.32	14.8	100
CTL	SB1590_XARGCTL012	504	330.42	185.41	86.58	78.53	100
CTL	SB1590_XARGCTL013	504	330.42	38.89	18.16	16.47	100
FICOLIN	SB1590_XARGFICOLIN001	1008	834.42	4312.74	797.49	723.34	100
FICOLIN	SB1590_XARGFICOLIN002	972	798.42	7712.26	1490.41	1351.84	100
FICOLIN	SB1590_XARGFICOLIN003	936	762.42	7259	1469.06	1332.47	100
KUNZ	SB1590_XARGKUNZ001	759	585.42	1511	398.25	361.22	100
PLB	SB1590_XARGPLB001	1662	1488.42	6125	634.94	575.91	100
seMMP-9	SB1590_XARGSeMMP001	2070	1896.42	13180.13	1072.36	972.66	100
SVMP P-III	SB1590_XARGSVMPIII001	1833	1659.42	89456	8317.79	7544.45	100
SVMP P-III	SB1590_XARGSVMPIII002	1848	1674.42	144277.31	13295.01	12058.9	100
VEGF	SB1590_XARGVEGF001	447	273.42	40.09	22.63	20.52	100
VEGF	SB1590_XARGVEGF002	651	477.42	90.91	29.38	26.65	100

[truncated: 1 more sheets: TOX VS. Ñ TOX.]
