# Supplementary material for: The Venom Composition of the Snake Tribe Philodryadini: ‘Omic’ Techniques Reveal Intergeneric Variability among South American Racers
Source: Toxins (Basel). 2023 Jun 27;15(7):415. doi: 10.3390/toxins15070415 (PMC10467154; doi:10.3390/toxins15070415)
Supplement: Supplementary file 1 [file toxins-15-00415-s001.zip › Supplementary_Table_S4_proteomic_analyses.xlsx]

## Sheet: P. OLFERSII
Table S4. Abundance of putative toxins spectra expressed in venom pools identified from of proteomic analysis by mass spectrometry (LC-MS/MS).
Proteomic analysis of Philodryas olfersii venom pool (SB0026, SB0130, SB0131, SB0370)
Protein Group	Identified Proteins (78)	Molecular Weight	Total Spectra Count (TSC)*	Exclusive Unique Spectrum Count (EUSC)*
CRISP	SB0001_POLFCRISP001	27 kDa	509.508	128.273
CRISP	SB0235_PPATCRISP001	27 kDa	315.646	4.06296
CRISP	SB0183_PASZCRISP001	27 kDa	308.812	5.22381
CRISP	SB1590_XARGCRISP001	27 kDa	301.977	2.90212
CRISP	SB1881_PMATCRISP001	27 kDa	247.298	1.16085
CRISP	SB0559_CVIRCRISP001	27 kDa	209.395	1.74127
CRISP	rev_SB1881_PMATCRISP001	27 kDa	1.86405	1.74127
CRISP	rev_SB0001_POLFCRISP001	27 kDa	1.86405	1.16085
CTL	SB0001_POLFCTL006	18 kDa	75.8048	38.3079
CTL	SB0001_POLFCTL003	18 kDa	60.2711	27.8603
CTL	rev_SB0235_PPATCTL014	13 kDa	3.72811	2.90212
CVF	SB0307_PNATCVF001	177 kDa	6.83486	3.48254
FAXV	rev_SB0183_PASZFAXV001	54 kDa	1.86405	1.74127
FAXV	SB0183_PASZFAXV001	54 kDa	1.2427	1.16085
KUWAP	SB0183_PASZKUWAP003	41 kDa	1.86405	1.74127
KUWAP	rev_SB0559_CVIRKUWAP002	41 kDa	1.2427	1.16085
PLB	SB0001_POLFPLB001	64 kDa	11.1843	6.96508
seMMP-9	SB0026_POLFSeMMP001	77 kDa	100.038	50.4968
seMMP-9	SB0307_PNATSeMMP001	77 kDa	57.1643	1.16085
SVMP P-III	SB0001_POLFSVMPIII004	68 kDa	508.265	195.022
SVMP P-III	SB0001_POLFSVMPIII001	68 kDa	464.771	157.875
SVMP P-III	SB0001_POLFSVMPIII008	68 kDa	388.344	22.6365
SVMP P-III	SB0235_PPATSVMPIII008	68 kDa	277.123	2.90212
SVMP P-III	SB0001_POLFSVMPIII003	69 kDa	277.123	120.728
SVMP P-III	SB0001_POLFSVMPIII002	69 kDa	219.337	92.8677
SVMP P-III	SB0235_PPATSVMPIII010	68 kDa	211.881	4.06296
SVMP P-III	SB0001_POLFSVMPIII005	69 kDa	195.726	70.2312
SVMP P-III	SB1881_PMATSVMPIII022	68 kDa	191.376	5.22381
SVMP P-III	SB1881_PMATSVMPIII138	69 kDa	182.677	4.64338
SVMP P-III	SB0307_PNATSVMPIII006	68 kDa	174.6	2.32169
SVMP P-III	SB0183_PASZSVMPIII003	68 kDa	152.852	2.32169
SVMP P-III	SB1881_PMATSVMPIII240	69 kDa	136.697	1.16085
SVMP P-III	SB0001_POLFSVMPIII006	68 kDa	126.134	1.74127
SVMP P-III	SB0307_PNATSVMPIII002	69 kDa	107.494	1.74127
SVMP P-III	SB0559_CVIRSVMPIII006	68 kDa	111.222	2.90212
SVMP P-III	SB0001_POLFSVMPIII007	70 kDa	97.5521	33.6645
SVMP P-III	SB0307_PNATSVMPIII001	70 kDa	86.9892	1.74127
SVMP P-III	SB1881_PMATSVMPIII003	70 kDa	87.6105	1.16085
SVMP P-III	SB0235_PPATSVMPIII001	69 kDa	78.2902	1.16085
SVMP P-III	SB0235_PPATSVMPIII005	69 kDa	77.6689	2.32169
SVMP P-III	SB0235_PPATSVMPIII011	69 kDa	70.2127	1.74127
SVMP P-III	SB0559_CVIRSVMPIII009	69 kDa	67.1059	1.74127
SVMP P-III	SB0512_CLATSVMPIII007	69 kDa	63.9992	2.32169
SVMP P-III	SB1881_PMATSVMPIII033	69 kDa	60.8924	9.86719
SVMP P-III	SB0235_PPATSVMPIII007	69 kDa	48.4654	1.16085
SVMP P-III	SB1590_XARGSVMPIII001	69 kDa	49.0867	2.90212
SVMP P-III	SB0235_PPATSVMPIII009	68 kDa	45.98	1.74127
SVMP P-III	SB1881_PMATSVMPIII001	68 kDa	32.9316	2.32169
SVMP P-III	SB0512_CLATSVMPIII001	69 kDa	32.3103	3.48254
SVMP P-III	SB0235_PPATSVMPIII004	69 kDa	12.427	6.38465
SVMP P-III	SB0235_PPATSVMPIII002	69 kDa	9.32027	2.90212
SVMP P-III	rev_SB0001_POLFSVMPIII001	68 kDa	3.10676	2.32169
SVMP P-III	rev_SB0559_CVIRSVMPIII004	69 kDa	3.72811	2.90212
SVMP P-III	rev_SB0183_PASZSVMPIII003	68 kDa	2.4854	1.74127
SVMP P-III	rev_SB0001_POLFSVMPIII006	68 kDa	3.72811	2.90212
SVMP P-III	rev_SB0235_PPATSVMPIII003	68 kDa	2.4854	1.74127
SVMP P-III	rev_SB1590_XARGSVMPIII001	69 kDa	3.10676	2.32169
SVMP P-III	rev_SB0307_PNATSVMPIII004	68 kDa	3.10676	1.16085
SVMP P-III	rev_SB0512_CLATSVMPIII001	69 kDa	1.86405	1.74127
SVMP P-III	rev_SB0235_PPATSVMPIII002	69 kDa	1.86405	1.74127
SVMP P-III	rev_SB0001_POLFSVMPIII002	69 kDa	1.86405	1.74127
SVMP P-III	rev_SB0183_PASZSVMPIII006	69 kDa	1.86405	1.16085
SVMP P-III	rev_SB1881_PMATSVMPIII001	68 kDa	1.86405	1.16085
SVMP P-III	rev_SB1881_PMATSVMPIII003	70 kDa	1.2427	1.16085
SVMP P-III	rev_SB0183_PASZSVMPIII005	69 kDa	1.86405	1.16085
SVMP P-III	rev_SB0559_CVIRSVMPIII002	70 kDa	1.2427	1.16085
SVMP P-III	rev_SB0235_PPATSVMPIII009	68 kDa	1.2427	1.16085
SVMP P-III	rev_SB1881_PMATSVMPIII028	69 kDa	1.2427	1.16085
SVMP P-III	rev_SB0001_POLFSVMPIII008	68 kDa	1.2427	1.16085
SVSP	SB0001_POLFSVSP002	28 kDa	206.91	65.0074
SVSP	SB0001_POLFSVSP001	29 kDa	160.93	16.2518
SVSP	SB0183_PASZSVSP001	28 kDa	160.93	6.38465
WAP	SB0235_PPATWAP003	9 kDa	3.72811	3.48254
WAP	rev_SB0235_PPATWAP003	9 kDa	3.10676	1.74127
WAP	rev_SB0183_PASZWAP001	14 kDa	3.72811	2.90212
WAP	SB0512_CLATWAP002	14 kDa	2.4854	2.32169
WAP	rev_SB0559_CVIRWAP002	14 kDa	2.4854	1.74127
WAP	rev_SB0183_PASZWAP002	9 kDa	2.4854	2.32169
* Relative expression is indicated by the total spectral count (TSC) normalized and by the exclusive unique spectra count (EUSC) normalized.

## Sheet: P. AGASSIZII
Table S4. Abundance of putative toxins spectra expressed in venom pools identified from of proteomic analysis by mass spectrometry (LC-MS/MS).
Proteomic analysis of Philodryas agassizii venom (SB0183)
Protein Group	Identified Proteins (15)	Molecular Weight	Total Spectra Count (TSC)*	Exclusive Unique Spectrum Count (EUSC)*
3FTX	SB0183_PASZ3FTX001	9 kDa	126.989	25.6522
3FTX	SB0183_PASZ3FTX002	9 kDa	84.6591	25.6522
CNP	SB0183_PASZCNP001	16 kDa	42.3295	17.1014
CRISP	SB0183_PASZCRISP001	27 kDa	761.932	171.014
CTL	SB0183_PASZCTL002	18 kDa	105.824	25.6522
KUWAP	SB0183_PASZKUWAP003	41 kDa	84.6591	25.6522
seMMP-9	SB0183_PASZSeMMP001	77 kDa	486.79	102.609
SVMP P-III	SB0183_PASZSVMPIII003	68 kDa	2222.3	273.623
SVMP P-III	SB0183_PASZSVMPIII001	68 kDa	1248.72	162.464
SVMP P-III	SB0183_PASZSVMPIII006	69 kDa	783.097	119.71
SVMP P-III	SB0183_PASZSVMPIII004	69 kDa	613.778	111.159
SVMP P-III	SB0001_POLFSVMPIII002	69 kDa	444.46	17.1014
SVMP P-III	SB0235_PPATSVMPIII004	69 kDa	338.636	68.4058
SVMP P-III	rev_SB0001_POLFSVMPIII008	68 kDa	63.4943	17.1014
WAP	SB0183_PASZWAP002	9 kDa	42.3295	17.1014
* Relative expression is indicated by the total spectral count (TSC) normalized and by the exclusive unique spectra count (EUSC) normalized.

## Sheet: P. PATAGONIENSIS
Table S4. Abundance of putative toxins spectra expressed in venom pools identified from of proteomic analysis by mass spectrometry (LC-MS/MS).
Proteomic analysis of Philodryas patagoniensis venom pool (SB0136, SB0235, SB0255)
Protein Group	Identified Proteins (57)	Molecular Weight	Total Spectra Count (TSC)*	Exclusive Unique Spectrum Count (EUSC)*
3FTx	rev_SB0512_CLAT3FTx005	9 kDa	1.66592	1.55468
AChE	SB1590_XARGAChE002	66 kDa	3.33184	2.33202
CRISP	SB0235_PPATCRISP001	27 kDa	187.416	83.1752
CRISP	SB0183_PASZCRISP001	27 kDa	152.432	3.10935
CTL	SB0001_POLFCTL006	18 kDa	28.3207	6.21871
CTL	SB0235_PPATCTL001	18 kDa	28.3207	12.4374
CTL	SB0235_PPATCTL004	18 kDa	33.3184	19.4335
CTL	SB0183_PASZCTL003	18 kDa	2.49888	1.55468
CVF	SB0307_PNATCVF001	177 kDa	36.6503	20.2108
FICOLIN	SB1881_PMATFICOLIN002	35 kDa	9.99553	5.44137
KUWAP	rev_SB0235_PPATKUWAP001	15 kDa	1.66592	1.55468
KUWAP	rev_SB0559_CVIRKUWAP002	41 kDa	1.66592	1.55468
PLB	SB0235_PPATPLB002	64 kDa	4.99776	3.10935
seMMP-9	SB0235_PPATSeMMP002	77 kDa	612.226	167.128
seMMP-9	SB0235_PPATSeMMP001	77 kDa	572.244	19.4335
seMMP-9	SB0307_PNATSeMMP001	77 kDa	307.362	2.33202
seMMP-9	SB0559_CVIRSeMMP022	76 kDa	282.374	3.10935
seMMP-9	SB0512_CLATSeMMP007	76 kDa	264.049	2.33202
SVMP P-III	SB0235_PPATSVMPIII010	68 kDa	451.465	76.9565
SVMP P-III	SB0235_PPATSVMPIII008	68 kDa	403.986	170.237
SVMP P-III	SB0235_PPATSVMPIII001	69 kDa	295.701	4.66403
SVMP P-III	SB0235_PPATSVMPIII006	66 kDa	280.708	1.55468
SVMP P-III	SB0235_PPATSVMPIII005	69 kDa	265.714	120.487
SVMP P-III	SB0001_POLFSVMPIII001	68 kDa	258.218	1.55468
SVMP P-III	SB0235_PPATSVMPIII003	68 kDa	256.552	94.058
SVMP P-III	SB0235_PPATSVMPIII011	69 kDa	234.062	16.3241
SVMP P-III	SB0235_PPATSVMPIII007	69 kDa	236.561	89.3939
SVMP P-III	SB0183_PASZSVMPIII005	69 kDa	231.563	4.66403
SVMP P-III	SB0183_PASZSVMPIII003	68 kDa	209.906	11.6601
SVMP P-III	SB0307_PNATSVMPIII006	68 kDa	194.913	1.55468
SVMP P-III	SB0001_POLFSVMPIII002	69 kDa	194.08	6.99605
SVMP P-III	SB1881_PMATSVMPIII138	69 kDa	162.427	48.195
SVMP P-III	SB1881_PMATSVMPIII022	68 kDa	139.937	5.44137
SVMP P-III	SB0183_PASZSVMPIII001	68 kDa	128.276	5.44137
SVMP P-III	SB0001_POLFSVMPIII004	68 kDa	114.116	3.10935
SVMP P-III	SB0001_POLFSVMPIII006	68 kDa	94.9575	3.10935
SVMP P-III	SB0183_PASZSVMPIII006	69 kDa	81.6301	3.88669
SVMP P-III	SB0559_CVIRSVMPIII006	68 kDa	79.9642	2.33202
SVMP P-III	SB0559_CVIRSVMPIII008	68 kDa	74.9665	1.55468
SVMP P-III	SB0235_PPATSVMPIII009	68 kDa	64.9709	6.21871
SVMP P-III	SB1881_PMATSVMPIII001	68 kDa	64.9709	2.33202
SVMP P-III	SB0235_PPATSVMPIII002	69 kDa	32.4855	17.8788
SVMP P-III	SB0512_CLATSVMPIII001	69 kDa	29.9866	3.10935
SVMP P-III	SB0235_PPATSVMPIII004	69 kDa	25.8218	8.55072
SVMP P-III	rev_SB0183_PASZSVMPIII003	68 kDa	4.1648	3.10935
SVMP P-III	rev_SB0559_CVIRSVMPIII009	69 kDa	2.49888	1.55468
SVMP P-III	rev_SB0559_CVIRSVMPIII008	68 kDa	1.66592	1.55468
SVMP P-III	rev_SB0001_POLFSVMPIII006	68 kDa	1.66592	1.55468
SVMP P-III	rev_SB0235_PPATSVMPIII001	69 kDa	1.66592	1.55468
SVSP	SB0235_PPATSVSP002	29 kDa	97.4564	48.9723
SVSP	SB0235_PPATSVSP001	29 kDa	99.9553	23.3202
SVSP	SB0183_PASZSVSP001	28 kDa	79.1313	15.5468
WAP	SB0235_PPATWAP003	9 kDa	10.8285	5.44137
WAP	SB0235_PPATWAP001	14 kDa	5.83072	3.88669
WAP	rev_SB0307_PNATWAP002	14 kDa	2.49888	2.33202
WAP	SB0512_CLATWAP002	14 kDa	2.49888	2.33202
WAP	rev_SB0307_PNATWAP001	9 kDa	1.66592	1.55468
* Relative expression is indicated by the total spectral count (TSC) normalized and by the exclusive unique spectra count (EUSC) normalized.

## Sheet: P. NATTERERI
Table S4. Abundance of putative toxins spectra expressed in venom pools identified from of proteomic analysis by mass spectrometry (LC-MS/MS).
Proteomic analysis of Philodryas nattereri venom pool (SB0707, SB1027, SB1028)
Protein Group	Identified Proteins (69)	Molecular Weight	Total Spectra Count (TSC)*	Exclusive Unique Spectrum Count (EUSC)*
AChE	SB1590_XARGAChE001	62 kDa	2.68614	1.14508
CRISP	SB0307_PNATCRISP001	27 kDa	433.14	123.096
CRISP	SB1881_PMATCRISP001	27 kDa	202.803	1.71761
CRISP	SB0183_PASZCRISP001	27 kDa	75.2118	1.14508
CTL	SB1881_PMATCTL002	18 kDa	28.2044	14.3134
CTL	SB0307_PNATCTL005	19 kDa	25.5183	13.1684
CTL	SB0512_CLATCTL016	13 kDa	10.7445	1.14508
CTL	SB1881_PMATCTL010	20 kDa	8.05841	4.00776
CTL	SB0307_PNATCTL006	18 kDa	3.35767	1.71761
CTL	SB1881_PMATCTL007	19 kDa	2.0146	1.14508
CVF	SB0307_PNATCVF001	177 kDa	51.0366	26.3367
FAXV	SB0512_CLATFAXV001	54 kDa	2.0146	1.71761
iPLA	SB0307_PNATiPLA001	25 kDa	9.40148	5.15284
KUNZ	rev_SB0001_POLFKUNZ001	41 kDa	1.34307	1.14508
KUNZ	rev_SB1881_PMATKUNZ001	58 kDa	1.34307	1.14508
KUNZ	SB1881_PMATKUNZ002	28 kDa	1.34307	1.14508
KUWAP	SB0001_POLFKUWAP001	15 kDa	2.0146	1.71761
KUWAP	SB0183_PASZKUWAP003	41 kDa	2.0146	1.14508
PLB	SB1590_XARGPLB001	64 kDa	5.37227	2.86269
seMMP-9	SB0307_PNATSeMMP003	77 kDa	519.767	162.028
seMMP-9	SB0001_POLFSeMMP001	77 kDa	410.979	15.4585
seMMP-9	SB1881_PMATSeMMP001	77 kDa	377.402	10.3057
seMMP-9	SB0559_CVIRSeMMP022	76 kDa	157.139	1.14508
seMMP-9	rev_SB0559_CVIRSeMMP018	76 kDa	1.34307	1.14508
seMMP-9	rev_SB0559_CVIRSeMMP022	76 kDa	1.34307	1.14508
SVMP P-III	SB0307_PNATSVMPIII005	69 kDa	596.322	204.968
SVMP P-III	SB1881_PMATSVMPIII138	69 kDa	486.191	24.6191
SVMP P-III	SB0307_PNATSVMPIII006	68 kDa	465.373	158.593
SVMP P-III	SB0307_PNATSVMPIII001	70 kDa	365.315	112.79
SVMP P-III	SB0307_PNATSVMPIII002	69 kDa	326.366	92.7511
SVMP P-III	SB0235_PPATSeMMP002	77 kDa	285.402	2.29015
SVMP P-III	SB0235_PPATSVMPIII005	69 kDa	259.884	76.72
SVMP P-III	SB0001_POLFSVMPIII002	69 kDa	198.774	13.1684
SVMP P-III	SB0235_PPATSVMPIII010	68 kDa	186.686	1.71761
SVMP P-III	SB0183_PASZSVMPIII003	68 kDa	184.672	2.86269
SVMP P-III	SB0235_PPATSVMPIII003	68 kDa	159.154	3.43523
SVMP P-III	SB1881_PMATSVMPIII003	70 kDa	151.095	1.14508
SVMP P-III	SB1881_PMATSVMPIII022	68 kDa	146.394	1.14508
SVMP P-III	SB0001_POLFSVMPIII007	70 kDa	141.694	1.14508
SVMP P-III	SB0559_CVIRSVMPIII009	69 kDa	139.679	2.86269
SVMP P-III	SB0512_CLATSVMPIII007	69 kDa	142.365	1.14508
SVMP P-III	SB0183_PASZSVMPIII004	69 kDa	128.935	1.14508
SVMP P-III	SB0559_CVIRSVMPIII008	68 kDa	118.862	1.71761
SVMP P-III	SB0559_CVIRSVMPIII007	68 kDa	111.475	1.71761
SVMP P-III	SB0235_PPATSVMPIII001	69 kDa	83.2702	2.29015
SVMP P-III	SB1881_PMATSVMPIII033	69 kDa	75.2118	2.29015
SVMP P-III	SB0235_PPATSVMPIII007	69 kDa	72.5257	1.14508
SVMP P-III	SB0235_PPATSVMPIII011	69 kDa	53.7227	1.14508
SVMP P-III	SB0559_CVIRSVMPIII010	69 kDa	57.7519	3.43523
SVMP P-III	SB0512_CLATSVMPIII001	69 kDa	32.2336	2.86269
SVMP P-III	SB0235_PPATSVMPIII004	69 kDa	6.71534	2.29015
SVMP P-III	rev_SB1881_PMATSVMPIII033	69 kDa	4.70074	2.86269
SVMP P-III	SB0559_CVIRSVMPIII002	70 kDa	4.70074	1.14508
SVMP P-III	rev_SB0235_PPATSVMPIII005	69 kDa	2.68614	1.71761
SVMP P-III	rev_SB0559_CVIRSVMPIII004	69 kDa	2.68614	1.71761
SVMP P-III	rev_SB0235_PPATSVMPIII007	69 kDa	1.34307	1.14508
SVMP P-III	rev_SB0001_POLFSVMPIII002	69 kDa	2.0146	1.71761
SVMP P-III	rev_SB0183_PASZSVMPIII003	68 kDa	2.0146	1.14508
SVMP P-III	rev_SB0235_PPATSVMPIII011	69 kDa	1.34307	1.14508
SVMP P-III	rev_SB0307_PNATSVMPIII002	69 kDa	1.34307	1.14508
SVSP	SB0307_PNATSVSP001	29 kDa	71.1826	32.6346
SVSP	SB0183_PASZSVSP001	28 kDa	14.7738	1.71761
SVSP	SB0307_PNATSVSP002	33 kDa	12.0876	1.71761
WAP	SB0307_PNATWAP002	14 kDa	5.37227	3.43523
WAP	SB0307_PNATWAP001	9 kDa	5.37227	3.43523
WAP	rev_SB0235_PPATWAP003	9 kDa	2.68614	2.29015
WAP	SB0183_PASZWAP002	9 kDa	1.34307	1.14508
WAP	rev_SB0235_PPATWAP001	14 kDa	1.34307	1.14508
WAP	rev_SB0307_PNATWAP001	9 kDa	1.34307	1.14508
* Relative expression is indicated by the total spectral count (TSC) normalized and by the exclusive unique spectra count (EUSC) normalized.

## Sheet: C. LATICEPS
Table S4. Abundance of putative toxins spectra expressed in venom pools identified from of proteomic analysis by mass spectrometry (LC-MS/MS).
Proteomic analysis of Chlorosoma laticeps venom (SB0512)
Protein Group	Identified Proteins (37)	Molecular Weight	Total Spectra Count (TSC)*	Exclusive Unique Spectrum Count (EUSC)*
CRISP	SB0512_CLATCRISP001	27 kDa	132.982	54.8566
CTL	SB0512_CLATCTL015	18 kDa	99.7363	38.5163
CTL	SB0512_CLATCTL002	18 kDa	80.0913	31.5134
CTL	SB1881_PMATCTL005	18 kDa	18.1339	5.83581
CTL	rev_SB1590_XARGCTL013	19 kDa	4.53347	3.50148
CVF	SB0307_PNATCVF001	177 kDa	9.06694	4.66864
KUNZ	rev_SB0001_POLFKUNZ001	41 kDa	3.02231	2.33432
PLB	SB0512_CLATPLB001	65 kDa	9.06694	4.66864
seMMP-9	SB0512_CLATSeMMP007	76 kDa	1361.55	316.301
seMMP-9	SB0559_CVIRSeMMP022	76 kDa	751.045	15.1731
seMMP-9	SB0559_CVIRSeMMP011	76 kDa	698.154	11.6716
seMMP-9	SB0307_PNATSeMMP001	77 kDa	596.907	46.6864
seMMP-9	SB0183_PASZSeMMP002	77 kDa	518.327	3.50148
seMMP-9	SB1881_PMATSeMMP001	77 kDa	521.349	5.83581
seMMP-9	SB0512_CLATiPLA002	25 kDa	12.0892	5.83581
seMMP-9	SB0512_CLATiPLA001	25 kDa	10.5781	2.33432
seMMP-9	SB0512_CLAT3FTx005	9 kDa	12.0892	4.66864
seMMP-9	SB1590_XARGAChE001	62 kDa	6.04462	2.33432
SVMP P-III	SB0512_CLATSVMPIII001	69 kDa	530.416	168.071
SVMP P-III	SB0512_CLATSVMPIII007	69 kDa	406.501	135.391
SVMP P-III	SB0512_CLATSVMPIII003	69 kDa	243.296	44.3521
SVMP P-III	SB0559_CVIRSVMPIII004	69 kDa	129.959	7.00297
SVMP P-III	SB0183_PASZSVMPIII002	68 kDa	125.426	4.66864
SVMP P-III	SB0001_POLFSVMPIII007	70 kDa	98.2252	11.6716
SVMP P-III	SB1881_PMATSVMPIII033	69 kDa	89.1582	11.6716
SVMP P-III	SB1590_XARGSVMPIII001	69 kDa	90.6694	3.50148
SVMP P-III	SB1881_PMATSVMPIII022	68 kDa	78.5801	7.00297
SVMP P-III	SB0235_PPATSVMPIII007	69 kDa	75.5578	3.50148
SVMP P-III	SB0559_CVIRSVMPIII007	68 kDa	71.0243	2.33432
SVMP P-III	SB0183_PASZSVMPIII003	68 kDa	64.9797	9.33729
SVMP P-III	SB1881_PMATSVMPIII001	68 kDa	45.3347	4.66864
SVMP P-III	SB0001_POLFSVMPIII006	68 kDa	40.8012	3.50148
SVMP P-III	SB0235_PPATSVMPIII009	68 kDa	36.2677	8.17013
SVMP P-III	SB1590_XARGSVMPIII003	69 kDa	22.6673	9.33729
SVMP P-III	rev_SB0512_CLATSVMPIII001	69 kDa	7.55578	5.83581
SVSP	SB0512_CLATSVSP002	29 kDa	412.546	166.904
WAP	SB0512_CLATWAP002	14 kDa	36.2677	12.8388
* Relative expression is indicated by the total spectral count (TSC) normalized and by the exclusive unique spectra count (EUSC) normalized.

## Sheet: C. VIRIDISSIMUM
Table S4. Abundance of putative toxins spectra expressed in venom pools identified from of proteomic analysis by mass spectrometry (LC-MS/MS).
Proteomic analysis of Chlorosoma viridissimum venom (SB0559)
Protein Group	Identified Proteins (38)	Molecular Weight	Total Spectra Count (TSC)*	Exclusive Unique Spectrum Count (EUSC)*
CNP	SB0307_PNATCNP001	16 kDa	1.71758	3.10118
CRISP	SB0559_CVIRCRISP001	27 kDa	258.496	94.5861
CRISP	rev_SB0235_PPATCRISP001	27 kDa	1.71758	3.10118
CTL	SB0559_CVIRCTL003	18 kDa	33.4928	37.2142
CTL	SB0559_CVIRCTL010	18 kDa	23.1873	24.8095
CTL	SB1881_PMATCTL005	18 kDa	2.57637	3.10118
FICOLIN	SB1590_XARGFICOLIN003	35 kDa	12.0231	12.4047
FICOLIN	SB1881_PMATFICOLIN002	35 kDa	7.72911	3.10118
KUNZ	rev_SB0183_PASZKUNZ002	11 kDa	1.71758	3.10118
NUCL	rev_SB0512_CLATNUCL001	64 kDa	1.71758	3.10118
PLB	SB0512_CLATPLB001	65 kDa	9.44669	9.30355
seMMP-9	SB0559_CVIRSeMMP018	76 kDa	1070.05	66.6754
seMMP-9	SB0559_CVIRSeMMP011	76 kDa	960.127	289.961
seMMP-9	SB0559_CVIRSeMMP022	76 kDa	899.153	85.2825
seMMP-9	SB0512_CLATSeMMP007	76 kDa	863.942	24.8095
seMMP-9	SB01590_XARGSeMMP001	76 kDa	588.271	12.4047
seMMP-9	SB0235_PPATSeMMP002	77 kDa	578.824	10.8541
seMMP-9	SB0183_PASZSeMMP002	77 kDa	551.343	4.65177
SVMP P-III	SB0559_CVIRSVMPIII004	69 kDa	433.689	138.003
SVMP P-III	SB0559_CVIRSVMPIII009	69 kDa	203.533	120.946
SVMP P-III	SB0559_CVIRSVMPIII007	68 kDa	169.182	54.2707
SVMP P-III	SB0512_CLATSVMPIII001	69 kDa	121.948	4.65177
SVMP P-III	SB0559_CVIRSVMPIII008	68 kDa	126.242	20.1577
SVMP P-III	SB0559_CVIRSVMPIII006	68 kDa	120.231	6.20237
SVMP P-III	SB0559_CVIRSVMPIII010	69 kDa	56.6801	12.4047
SVMP P-III	SB0183_PASZSVMPIII003	68 kDa	38.6455	4.65177
SVMP P-III	SB0001_POLFSVMPIII004	68 kDa	32.634	4.65177
SVMP P-III	SB0235_PPATSVMPIII007	69 kDa	36.0692	4.65177
SVMP P-III	SB1590_XARGSVMPIII002	69 kDa	25.7637	3.10118
SVMP P-III	SB1881_PMATSVMPIII138	69 kDa	24.0461	13.9553
SVMP P-III	SB0559_CVIRSVMPIII002	70 kDa	27.4813	27.9106
SVMP P-III	SB1881_PMATSVMPIII001	68 kDa	15.4582	4.65177
SVMP P-III	SB0001_POLFSVMPIII002	69 kDa	15.4582	4.65177
SVMP P-III	rev_SB0001_POLFSVMPIII006	68 kDa	3.43516	6.20237
SVSP	SB0559_CVIRSVSP002	29 kDa	115.078	46.5177
SVSP	SB0512_CLATSVSP002	29 kDa	14.5994	3.10118
WAP	SB0183_PASZWAP001	14 kDa	2.57637	4.65177
WAP	rev_SB0235_PPATWAP001	14 kDa	1.71758	3.10118
* Relative expression is indicated by the total spectral count (TSC) normalized and by the exclusive unique spectra count (EUSC) normalized.

## Sheet: X. ARGENTEUS
Table S4. Abundance of putative toxins spectra expressed in venom pools identified from of proteomic analysis by mass spectrometry (LC-MS/MS).
Proteomic analysis of Xenoxybelis argenteus venom (SB1590)
Protein Group	Identified Proteins (37)	Molecular Weight	Total Spectra Count (TSC)*	Exclusive Unique Spectrum Count (EUSC)*
CRISP	SB1590_XARGCRISP001	27 kDa	1676.61	200.08
CTL	SB1590_XARGCTL006	19 kDa	60.3532	42.5367
CTL	SB1590_XARGCTL001	18 kDa	59.1461	31.5087
CTL	SB0512_CLATCTL002	18 kDa	19.313	3.15087
CTL	rev_SB0235_PPATCTL014	13 kDa	2.41413	3.15087
FAXV	SB0512_CLATFAXV001	54 kDa	4.82826	4.7263
FICOLIN	SB1590_XARGFICOLIN003	35 kDa	19.313	12.6035
KUNZ	rev_SB0001_POLFKUNZ001	41 kDa	2.41413	3.15087
PLB	SB1590_XARGPLB001	64 kDa	19.313	17.3298
seMMP-9	SB01590_XARGSeMMP001	76 kDa	212.443	124.459
seMMP-9	SB0512_CLATSeMMP007	76 kDa	77.2521	6.30174
SVMP P-III	SB0235_PPATSVMPIII005	69 kDa	669.921	88.2243
SVMP P-III	SB0001_POLFSVMPIII002	69 kDa	599.911	11.028
SVMP P-III	SB1590_XARGSVMPIII002	69 kDa	528.694	204.806
SVMP P-III	SB1881_PMATSVMPIII138	69 kDa	359.705	83.498
SVMP P-III	SB1590_XARGSVMPIII001	69 kDa	365.74	148.091
SVMP P-III	SB1881_PMATSVMPIII003	70 kDa	322.286	4.7263
SVMP P-III	SB0307_PNATSVMPIII002	69 kDa	288.488	12.6035
SVMP P-III	SB0307_PNATSVMPIII005	69 kDa	265.554	12.6035
SVMP P-III	SB1881_PMATSVMPIII240	69 kDa	216.064	20.4806
SVMP P-III	SB0512_CLATSVMPIII001	69 kDa	205.201	7.87717
SVMP P-III	SB0001_POLFSVMPIII003	69 kDa	194.337	14.1789
SVMP P-III	SB0559_CVIRSVMPIII009	69 kDa	190.716	9.4526
SVMP P-III	SB1881_PMATSVMPIII022	68 kDa	187.095	17.3298
SVMP P-III	SB0235_PPATSVMPIII007	69 kDa	184.681	6.30174
SVMP P-III	SB0183_PASZSVMPIII003	68 kDa	184.681	11.028
SVMP P-III	SB0307_PNATSVMPIII001	70 kDa	166.575	4.7263
SVMP P-III	SB0235_PPATSVMPIII009	68 kDa	97.7722	9.4526
SVMP P-III	SB1881_PMATSVMPIII033	69 kDa	72.4238	9.4526
SVMP P-III	SB0001_POLFSVMPIII006	68 kDa	50.6967	4.7263
SVMP P-III	SB1881_PMATSVMPIII001	68 kDa	48.2826	4.7263
SVMP P-III	SB0307_PNATSVMPIII004	68 kDa	41.0402	7.87717
SVMP P-III	SB0559_CVIRSVMPIII002	70 kDa	24.1413	9.4526
SVMP P-III	SB1590_XARGSVMPIII003	69 kDa	19.313	14.1789
SVMP P-III	rev_SB0307_PNATSVMPIII006	68 kDa	7.24238	6.30174
SVMP P-III	rev_SB0307_PNATSVMPIII001	70 kDa	3.62119	4.7263
SVMP P-III	rev_SB0235_PPATSVMPIII009	68 kDa	2.41413	3.15087
* Relative expression is indicated by the total spectral count (TSC) normalized and by the exclusive unique spectra count (EUSC) normalized.
