# Supplementary material for: The Venom Composition of the Snake Tribe Philodryadini: ‘Omic’ Techniques Reveal Intergeneric Variability among South American Racers
Source: Toxins (Basel). 2023 Jun 27;15(7):415. doi: 10.3390/toxins15070415 (PMC10467154; doi:10.3390/toxins15070415)
Supplement: Supplementary file 1 [file toxins-15-00415-s001.zip › Supplementary_Table_S5 _identification_peptides_sdspage.xlsx]

## Sheet: Band 1 - C.LAT
Table S5. Identification of venom proteins from bands of interest on the SDS-PAGE gel using the final master set of annotated sequences from Philodryadini as a database.
Chlorosoma laticeps - Band 1
PHILODRYADINI DATABASE
Protein Group	-10lgP	Coverage (%)	#Peptides	Description
CTL	47.69	14	2	SB0512_CLATCTL014
seMMP-9	404.70	49	56	SB0512_CLATSeMMP007
seMMP-9	351.20	38	33	SB1590_XARGseMMP9_001
seMMP-9	334.96	40	44	SB0559_CVIRSeMMP022
seMMP-9	331.20	40	38	SB0559_CVIRSeMMP011
seMMP-9	315.60	37	39	SB0307_PNATSeMMP001
seMMP-9	314.09	32	39	SB0001_POLFSeMMP001
seMMP-9	305.65	39	42	SB0235_PPATSeMMP002
seMMP-9	303.04	35	44	SB0183_PASZSeMMP001
SVMP P-III	68.95	5	2	SB0512_CLATSVMPIII001
SVMP P-III	54.29	6	3	SB0559_CVIRSVMPIII007
SVSP	306.54	56	20	SB0512_CLATSVSP002
SVSP	239.69	41	13	SB0001_POLFSVSP002
SVSP	239.68	36	11	SB0001_POLFSVSP001
SVSP	132.62	13	7	SB0559_CVIRSVSP007
SVSP	129.74	24	10	SB0307_PNATSVSP001
SVSP	114.17	22	7	SB0559_CVIRSVSP002

## Sheet: Band 2 - C.VIR
Table S5. Identification of venom proteins from bands of interest on the SDS-PAGE gel using the final master set of annotated sequences from Philodryadini as a database.
Chlorosoma viridissimum - Band 2
PHILODRYADINI DATABASE
Protein Group	-10lgP	Coverage (%)	#Peptides	Description
CNP	20.60	8	1	SB0559_CVIRCNP001
CTL	36.87	19	2	SB0559_CVIRCTL011
CTL	28.22	8	1	SB0512_CLATCTL014
CTL	21.38	11	1	SB0183_PASZCTL005
seMMP-9	438.68	45	70	SB0559_CVIRSeMMP011
seMMP-9	434.38	38	63	SB0559_CVIRSeMMP022
seMMP-9	379.35	39	52	SB0559_CVIRSeMMP018
seMMP-9	377.99	45	57	SB0183_PASZSeMMP001
seMMP-9	369.21	49	51	SB0307_PNATSeMMP001
seMMP-9	363.80	46	61	SB0512_CLATSeMMP007
seMMP-9	350.14	49	47	SB1590_XARGseMMP9_001
seMMP-9	345.93	40	54	SB0235_PPATSeMMP002
seMMP-9	343.93	38	52	SB0235_PPATSeMMP001
seMMP-9	330.50	43	48	SB0001_POLFSeMMP001
SVMP P-III	224.22	23	20	SB0559_CVIRSVMPIII009
SVMP P-III	161.38	14	11	SB0559_CVIRSVMPIII004
SVMP P-III	146.62	15	10	SB0559_CVIRSVMPIII010
SVMP P-III	125.31	14	11	SB1590_XARGSVMPIII002
SVMP P-III	100.55	7	7	SB0235_PPATSVMPIII009
SVMP P-III	85.54	6	6	SB0559_CVIRSVMPIII012
SVMP P-III	83.20	8	5	SB0183_PASZSVMPIII005
SVMP P-III	85.93	10	6	SB0307_PNATSVMPIII003
SVMP P-III	44.64	3	3	SB1881_PMATSVMPIII002
SVSP	223.49	26	14	SB0559_CVIRSVSP002
SVSP	172.10	14	8	SB0512_CLATSVSP015
SVSP	158.77	17	8	SB0001_POLFSVSP001

## Sheet: Band 3 - C.VIR
Table S5. Identification of venom proteins from bands of interest on the SDS-PAGE gel using the final master set of annotated sequences from Philodryadini as a database.
Chlorosoma viridissimum - Band 3
PHILODRYADINI DATABASE
Protein Group	-10lgP	Coverage (%)	#Peptides	Description
CVF	22.22	2	1	SB0307_PNATCVF001
FICOLIN	20.42	2	1	SB1881_PMATFICOLIN002
iPLA	32.89	11	1	SB0001_POLFiPLA001
seMMP-9	496.05	55	94	SB0559_CVIRSeMMP018
seMMP-9	495.55	53	98	SB0559_CVIRSeMMP011
seMMP-9	412.53	46	61	SB0559_CVIRSeMMP022
seMMP-9	365.85	50	67	SB0512_CLATSeMMP007
seMMP-9	355.67	41	57	SB0183_PASZSeMMP001
seMMP-9	342.19	46	63	SB0235_PPATSeMMP002
seMMP-9	335.75	44	49	SB1590_XARGseMMP9_001
seMMP-9	335.59	34	49	SB0307_PNATSeMMP001
seMMP-9	333.14	48	53	SB0001_POLFSeMMP001
SVMP P-III	186.03	14	8	SB0559_CVIRSVMPIII004
SVMP P-III	158.96	13	10	SB0559_CVIRSVMPIII009
SVMP P-III	108.55	4	4	SB1881_PMATSVMPIII004
SVMP P-III	42.22	7	2	SB0183_PASZSVMPIII005
SVMP P-III	42.22	7	2	SB0235_PPATSVMPIII005
SVMP P-III	42.22	7	2	SB0183_PASZSVMPIII004
SVMP P-III	33.70	4	1	SB0307_PNATSVMPIII003
seMMP-9	158.68	15	7	SB0512_CLATSVSP002
SVSP	290.10	35	18	SB0559_CVIRSVSP002
SVSP	158.68	15	7	SB0512_CLATSVSP015

## Sheet: Band 4 - P.PAT
Table S5. Identification of venom proteins from bands of interest on the SDS-PAGE gel using the final master set of annotated sequences from Philodryadini as a database.
Philodryas patagoniensis - Band 4
PHILODRYADINI DATABASE
Protein Group	-10lgP	Coverage (%)	#Peptides	Description
seMMP-9	442.28	51	57	SB0235_PPATSeMMP001
seMMP-9	440.91	51	55	SB0235_PPATSeMMP002
seMMP-9	393.29	39	42	SB0183_PASZSeMMP001
seMMP-9	366.05	30	34	SB0001_POLFSeMMP001
seMMP-9	356.95	30	25	SB1590_XARGseMMP9_001
seMMP-9	338.18	30	32	SB0307_PNATSeMMP001
seMMP-9	291.90	31	32	SB0559_CVIRSeMMP022
seMMP-9	288.97	35	35	SB0512_CLATSeMMP007
seMMP-9	284.41	28	27	SB0559_CVIRSeMMP018
SVMP P-III	265.64	25	27	SB0001_POLFSVMPIII003
SVMP P-III	239.91	24	26	SB0307_PNATSVMPIII005
SVMP P-III	149.34	10	6	SB1590_XARGSVMPIII002
SVMP P-III	107.89	5	5	SB1881_PMATSVMPIII001
SVMP P-III	101.13	7	6	SB0183_PASZSVMPIII006
SVSP	57.36	10	2	SB0001_POLFSVSP001
SVSP	20.25	1	1	SB0307_PNATCVF001

## Sheet: Band 5 - P.NAT
Table S5. Identification of venom proteins from bands of interest on the SDS-PAGE gel using the final master set of annotated sequences from Philodryadini as a database.
Philodryas nattereri - Band 5
PHILODRYADINI DATABASE
Protein Group	-10lgP	Coverage (%)	#Peptides	Description
iPLA	63.42	4	1	SB0307_PNATiPLA001
seMMP-9	302.95	30	22	SB0307_PNATSeMMP001
seMMP-9	241.52	11	9	SB0559_CVIRSeMMP011
seMMP-9	214.44	14	13	SB0183_PASZSeMMP001
SVMP P-III	119.45	6	4	SB0307_PNATSVMPIII005
SVMP P-III	57.71	3	3	SB0559_CVIRSVMPIII005
SVMP P-III	57.57	5	4	SB0235_PPATSVMPIII009
SVMP P-III	51.56	6	4	SB0001_POLFSVMPIII007
SVSP	148.39	14	3	SB0307_PNATSVSP001
SVSP	108.49	15	3	SB0001_POLFSVSP001
SVSP	105.69	16	3	SB0235_PPATSVSP001

## Sheet: Band 6 - P.OLF
Table S5. Identification of venom proteins from bands of interest on the SDS-PAGE gel using the final master set of annotated sequences from Philodryadini as a database.
Philodryas olfersii - Band 6
PHILODRYADINI DATABASE
Protein Group	-10lgP	Coverage (%)	#Peptides	Description
CTL	28.02	6	1	SB0307_PNATCTL005
CTL	28.02	6	1	SB0512_CLATCTL014
CTL	28.02	6	1	SB0512_CLATCTL015
CTL	28.02	6	1	SB0559_CVIRCTL003
CTL	28.02	6	1	SB0001_POLFCTL003
CTL	28.02	6	1	SB1881_PMATCTL001
CTL	28.02	6	1	SB1590_XARGCTL006
CTL	28.02	6	1	SB0235_PPATCTL001
seMMP-9	289.52	28	18	SB0559_CVIRSeMMP011
seMMP-9	276.70	29	21	SB0559_CVIRSeMMP018
seMMP-9	234.27	26	20	SB0183_PASZSeMMP001
seMMP-9	208.53	16	15	SB0307_PNATSeMMP001
seMMP-9	185.77	23	17	SB0001_POLFSeMMP001
seMMP-9	146.24	19	15	SB0235_PPATSeMMP002
seMMP-9	133.34	24	17	SB0512_CLATSeMMP007
seMMP-9	128.56	22	14	SB0559_CVIRSeMMP022
SVMP P-III	215.89	16	13	SB0001_POLFSVMPIII004
SVMP P-III	84.17	11	8	SB0559_CVIRSVMPIII010
SVSP	101.90	22	4	SB0235_PPATSVSP001
SVSP	97.75	10	3	SB0235_PPATSVSP002
SVSP	97.75	10	3	SB0001_POLFSVSP001
SVSP	97.75	10	3	SB0307_PNATSVSP001
SVSP	97.75	10	3	SB0001_POLFSVSP002
SVSP	97.75	10	3	SB0183_PASZSVSP001

## Sheet: Band 7 - P.OLF
Table S5. Identification of venom proteins from bands of interest on the SDS-PAGE gel using the final master set of annotated sequences from Philodryadini as a database.
Philodryas olfersii - Band 7
PHILODRYADINI DATABASE
Protein Group	-10lgP	Coverage (%)	#Peptides	Description
CRISP	96.71	12	4	SB1590_XARGCRISP001
CTL	36.22	6	1	SB0001_POLFCTL003
iPLA	20.45	12	1	SB0307_PNATiPLA001
seMMP-9	135.22	14	3	SB0559_CVIRSeMMP011
seMMP-9	129.85	8	2	SB0559_CVIRSeMMP018
seMMP-9	124.36	2	2	SB0307_PNATSeMMP001
seMMP-9	124.36	2	2	SB0183_PASZSeMMP001
SVLIPA	22.67	2	1	SB0307_PNATSVLIPA001
SVMP P-III	194.21	21	18	SB0001_POLFSVMPIII004
SVMP P-III	79.03	6	5	SB0001_POLFSVMPIII003
SVMP P-III	76.06	4	3	SB0307_PNATSVMPIII003
SVMP P-III	47.29	9	5	SB0235_PPATSVMPIII007
SVSP	293.78	43	13	SB0001_POLFSVSP002
SVSP	234.10	25	10	SB0307_PNATSVSP001
SVSP	228.48	24	10	SB0235_PPATSVSP002
SVSP	184.03	30	12	SB0559_CVIRSVSP007
SVSP	180.35	26	12	SB0307_PNATSVSP002
SVSP	117.89	15	5	SB0559_CVIRSVSP002
